# Supplementary material
Source: publisher site journal article supplement (https://www.dovepress.com/get_supplementary_file.php?f=333251.docx)
Supplement: Supplementary file 1 [file get_supplementary_file.php]

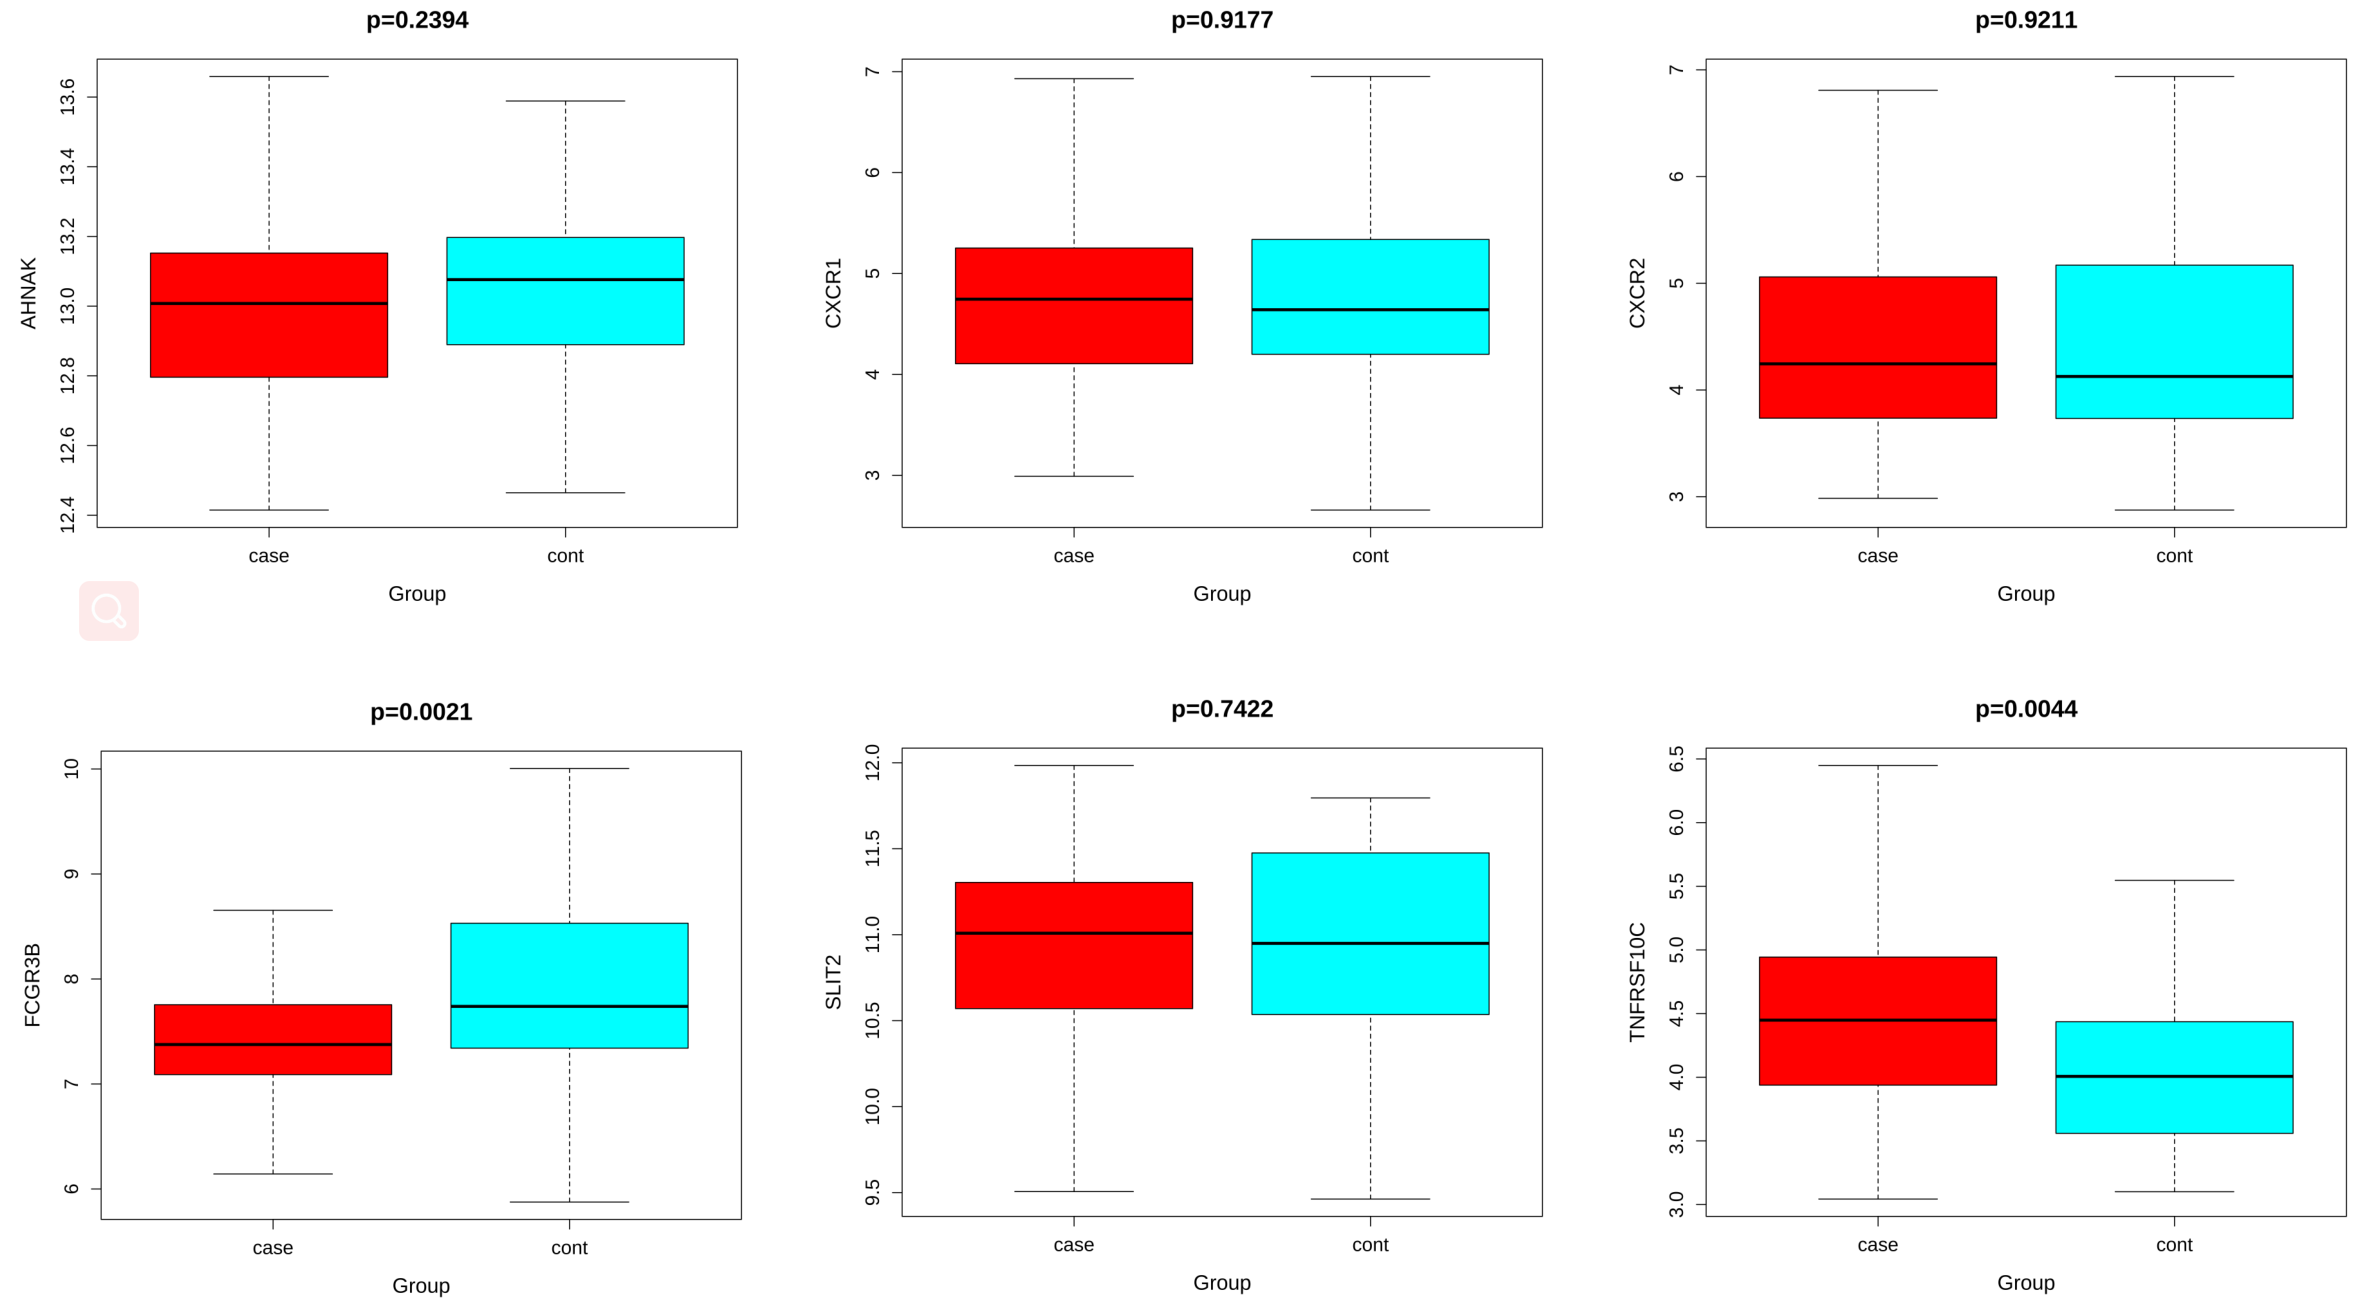


**Supplementary Figure 1.** The expression levels of the above six hub genes in the GSE76925 dataset.


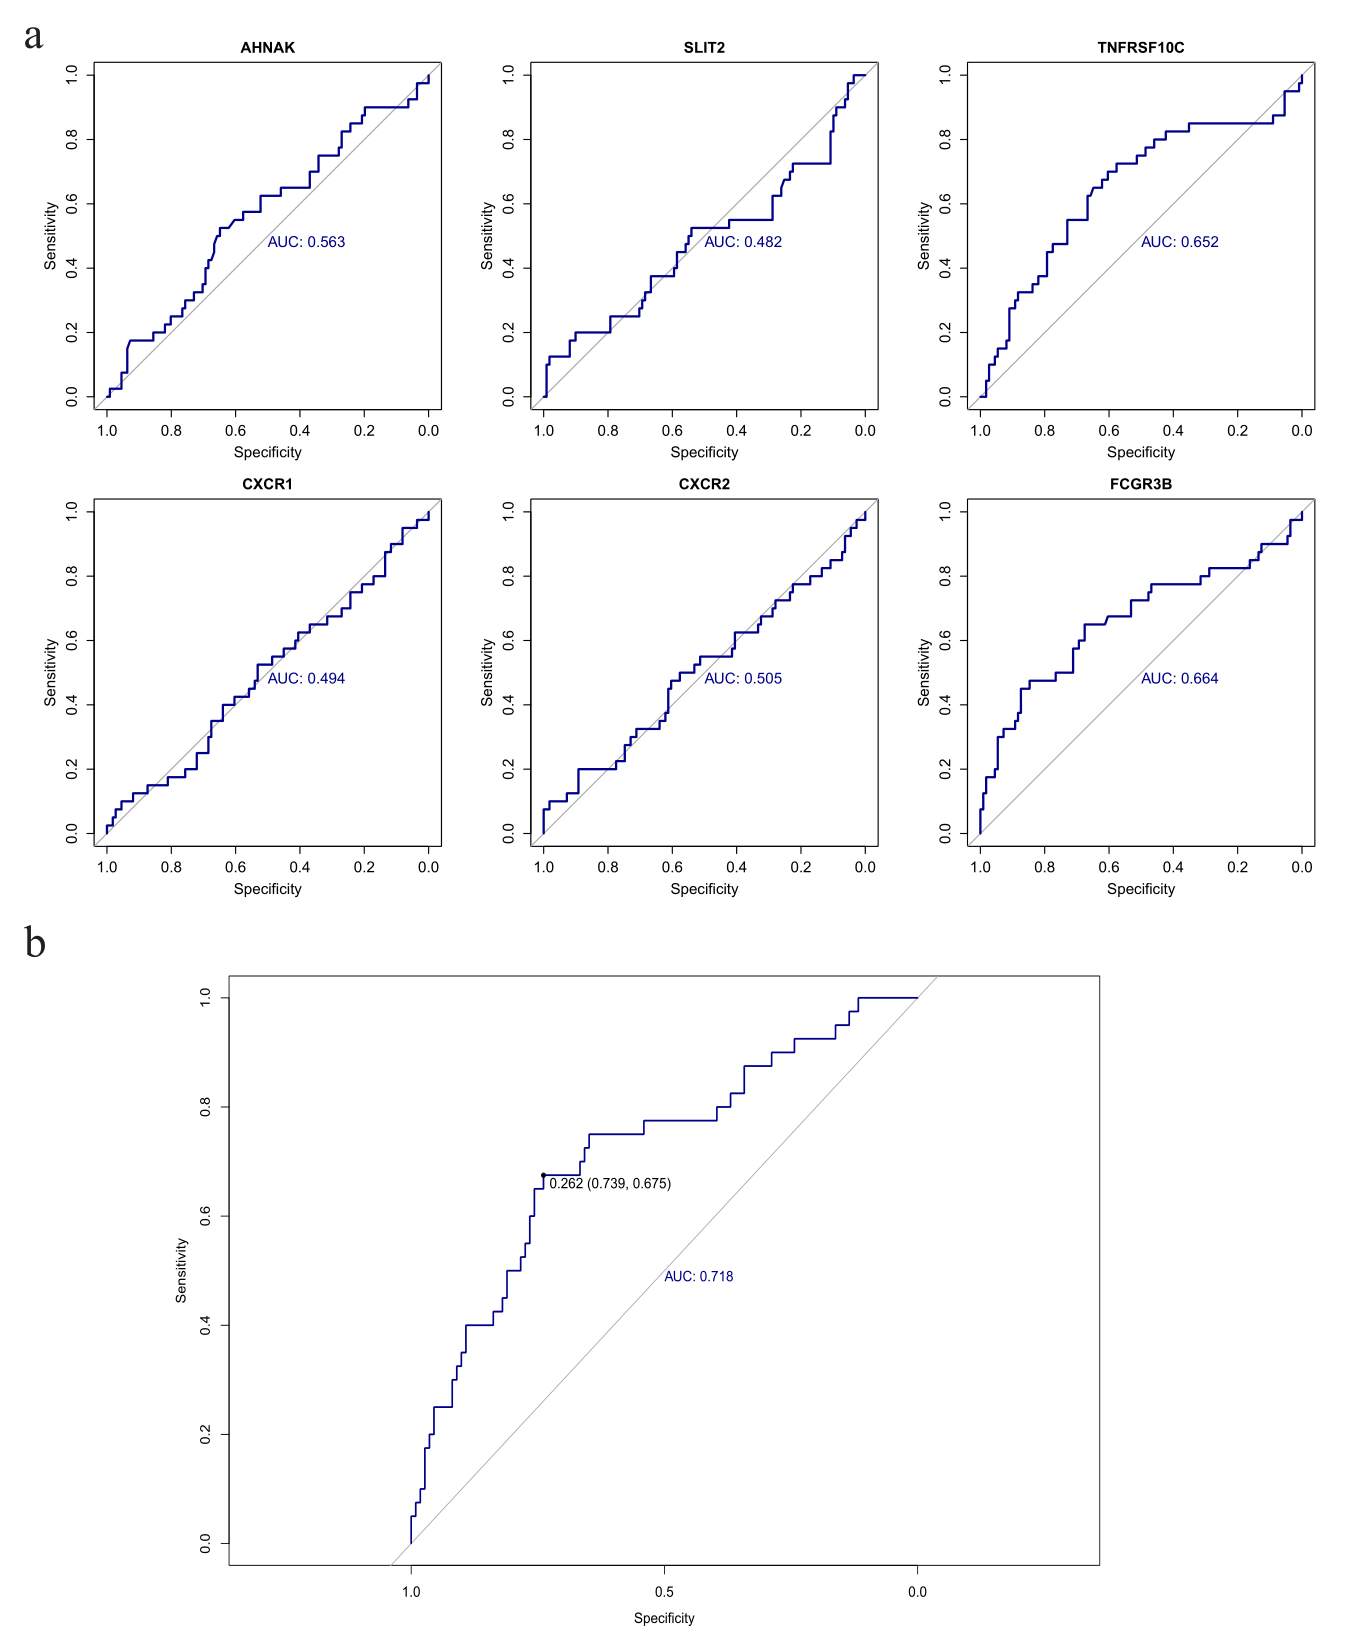


**Supplementary Figure 2.** The diagnostic value of the six hub genes and the logistic regression model based on them in the GSE76925 database (a-b).

| logFC | AveExpr | t | P.Value | adj.P.Val | B |  |
| --- | --- | --- | --- | --- | --- | --- |
| COX6A1 | -0.62377 | 7.832013 | -11.7706 | 4.01E-24 | 6.71E-20 | 44.09567 |
| STRA13 | -0.73198 | 4.423239 | -11.1526 | 2.51E-22 | 1.40E-18 | 40.05356 |
| LSM7 | -0.7741 | 5.653476 | -11.0759 | 4.18E-22 | 1.40E-18 | 39.55422 |
| RAD54L2 | 0.626831 | 2.276254 | 10.9208 | 1.17E-21 | 3.27E-18 | 38.54633 |
| NHSL2 | 0.685177 | 1.176795 | 10.85878 | 1.77E-21 | 4.23E-18 | 38.14408 |
| CCDC56 | -0.65685 | 5.133443 | -10.8149 | 2.37E-21 | 4.95E-18 | 37.85986 |
| STX8 | -0.66855 | 4.856493 | -10.435 | 2.91E-20 | 4.87E-17 | 35.40855 |
| TRAPPC6A | -0.61674 | 4.111716 | -10.4136 | 3.35E-20 | 5.10E-17 | 35.27097 |
| HMBOX1 | 0.966394 | 1.925715 | 10.39466 | 3.79E-20 | 5.29E-17 | 35.1492 |
| RPL36AL | -0.59105 | 8.578817 | -10.3724 | 4.39E-20 | 5.65E-17 | 35.00641 |
| GTF3C3 | 0.566563 | 3.317301 | 10.35271 | 5.00E-20 | 5.97E-17 | 34.87994 |
| RNF181 | -0.55311 | 5.532986 | -10.3256 | 5.97E-20 | 6.54E-17 | 34.70612 |
| RPLP2 | -0.88573 | 10.40133 | -10.3184 | 6.26E-20 | 6.54E-17 | 34.66026 |
| NUDT3 | 0.564914 | 3.765933 | 10.1184 | 2.32E-19 | 2.04E-16 | 33.38117 |
| ATP5G1 | -0.56461 | 5.693015 | -10.091 | 2.77E-19 | 2.32E-16 | 33.20647 |
| S100A6 | -0.77938 | 10.09609 | -9.9133 | 8.80E-19 | 5.89E-16 | 32.07668 |
| MRPL27 | -0.51315 | 5.01514 | -9.84915 | 1.33E-18 | 8.11E-16 | 31.67026 |
| C14orf49 | 0.634011 | 1.980491 | 9.838863 | 1.43E-18 | 8.11E-16 | 31.60513 |
| KIAA0889 | 0.54837 | 2.242235 | 9.815132 | 1.66E-18 | 8.61E-16 | 31.455 |
| NDUFB7 | -0.67569 | 6.110621 | -9.81193 | 1.70E-18 | 8.61E-16 | 31.43478 |
| RPL35 | -0.75012 | 9.643314 | -9.78365 | 2.04E-18 | 9.86E-16 | 31.25604 |
| FAM127B | -0.56711 | 4.615987 | -9.74985 | 2.54E-18 | 1.09E-15 | 31.04257 |
| RPS12 | -0.74955 | 10.6852 | -9.74912 | 2.55E-18 | 1.09E-15 | 31.038 |
| COX4I1 | -0.53657 | 7.438754 | -9.7193 | 3.09E-18 | 1.23E-15 | 30.84983 |
| RPL27 | -0.7989 | 10.45515 | -9.68299 | 3.91E-18 | 1.52E-15 | 30.621 |
| TRAPPC2L | -0.5955 | 4.934879 | -9.65781 | 4.59E-18 | 1.64E-15 | 30.46253 |
| NBPF10 | 0.641295 | 3.695349 | 9.619651 | 5.87E-18 | 1.98E-15 | 30.22251 |
| EDF1 | -0.54563 | 7.754479 | -9.61851 | 5.92E-18 | 1.98E-15 | 30.21531 |
| RASSF7 | -0.9153 | 4.516952 | -9.6135 | 6.11E-18 | 2.01E-15 | 30.18387 |
| MRPS24 | -0.60206 | 4.97718 | -9.59512 | 6.88E-18 | 2.17E-15 | 30.06837 |
| POLD4 | -0.64934 | 5.367461 | -9.57869 | 7.64E-18 | 2.37E-15 | 29.96522 |
| NDUFA7 | -0.64848 | 4.706135 | -9.56411 | 8.40E-18 | 2.51E-15 | 29.87372 |
| FASTK | -0.63581 | 3.830693 | -9.533 | 1.03E-17 | 2.99E-15 | 29.67863 |
| IFT43 | -0.56471 | 4.740448 | -9.53141 | 1.04E-17 | 2.99E-15 | 29.66868 |
| ERN1 | 0.752386 | 2.498546 | 9.489972 | 1.35E-17 | 3.63E-15 | 29.40915 |
| NDUFAB1 | -0.55985 | 5.964225 | -9.46312 | 1.60E-17 | 4.07E-15 | 29.24114 |
| APRT | -0.59687 | 4.927382 | -9.45535 | 1.69E-17 | 4.21E-15 | 29.19259 |
| TMSB4X | -0.6759 | 12.99883 | -9.42946 | 1.99E-17 | 4.73E-15 | 29.03085 |
| TMEM134 | -0.55771 | 4.068597 | -9.42833 | 2.00E-17 | 4.73E-15 | 29.02376 |
| COX8A | -0.66011 | 7.544303 | -9.40636 | 2.31E-17 | 5.29E-15 | 28.88663 |
| SPSB3 | -0.75595 | 4.294291 | -9.38288 | 2.68E-17 | 5.92E-15 | 28.74015 |
| EIF2C2 | 0.670732 | 1.904031 | 9.379541 | 2.74E-17 | 5.95E-15 | 28.71933 |
| DDI2 | 0.77418 | 1.628066 | 9.346031 | 3.39E-17 | 7.16E-15 | 28.51055 |
| TRMT112 | -0.53987 | 7.145363 | -9.34451 | 3.42E-17 | 7.16E-15 | 28.5011 |
| ARF5 | -0.50026 | 5.80441 | -9.32145 | 3.97E-17 | 7.93E-15 | 28.35754 |
| KRTCAP2 | -0.59432 | 6.511135 | -9.31983 | 4.01E-17 | 7.93E-15 | 28.3475 |
| ZNF121 | 0.553462 | 2.289829 | 9.318984 | 4.03E-17 | 7.93E-15 | 28.34221 |
| NME3 | -0.73404 | 4.054524 | -9.31461 | 4.14E-17 | 8.06E-15 | 28.31498 |
| SEC61B | -0.59477 | 7.086024 | -9.25103 | 6.21E-17 | 1.13E-14 | 27.92 |
| RUNDC2A | 0.58543 | 1.791349 | 9.229194 | 7.13E-17 | 1.24E-14 | 27.78457 |
| PRKAR2A | 0.786012 | 3.067418 | 9.207896 | 8.16E-17 | 1.37E-14 | 27.65257 |
| HIPK2 | 0.622403 | 3.25407 | 9.196334 | 8.78E-17 | 1.44E-14 | 27.58096 |
| DDT | -0.63759 | 5.795812 | -9.17514 | 1.00E-16 | 1.63E-14 | 27.44975 |
| IFI27L2 | -0.75752 | 6.050026 | -9.13884 | 1.26E-16 | 2.00E-14 | 27.22536 |
| TMEM219 | -0.56819 | 5.643213 | -9.10328 | 1.58E-16 | 2.41E-14 | 27.00576 |
| ASXL2 | 0.703561 | 2.322966 | 9.102955 | 1.59E-16 | 2.41E-14 | 27.00378 |
| RPS15 | -0.64412 | 9.099212 | -9.09651 | 1.65E-16 | 2.47E-14 | 26.964 |
| KLF7 | 0.743002 | 2.951932 | 9.090987 | 1.71E-16 | 2.51E-14 | 26.92996 |
| DOCK5 | 0.60435 | 2.268958 | 9.074274 | 1.90E-16 | 2.72E-14 | 26.82692 |
| KIAA0754 | 0.808881 | 1.268383 | 9.070015 | 1.95E-16 | 2.77E-14 | 26.80068 |
| C19orf70 | -0.69539 | 3.639056 | -9.02237 | 2.64E-16 | 3.51E-14 | 26.50739 |
| ANAPC11 | -0.56712 | 4.999753 | -9.01537 | 2.76E-16 | 3.63E-14 | 26.46432 |
| RPS10 | -0.5507 | 9.320857 | -9.0136 | 2.79E-16 | 3.65E-14 | 26.45344 |
| SFT2D2 | 0.602952 | 3.268855 | 9.004622 | 2.95E-16 | 3.83E-14 | 26.39828 |
| RPS20 | -0.51961 | 9.555979 | -8.97106 | 3.64E-16 | 4.46E-14 | 26.19219 |
| FKBP8 | -0.54051 | 5.725308 | -8.97065 | 3.65E-16 | 4.46E-14 | 26.18969 |
| BRAF | 0.536867 | 1.706254 | 8.908037 | 5.41E-16 | 6.34E-14 | 25.80593 |
| ENTPD5 | 0.5322 | 2.252847 | 8.903929 | 5.55E-16 | 6.46E-14 | 25.78079 |
| HRAS | -0.64479 | 3.695261 | -8.88521 | 6.25E-16 | 7.11E-14 | 25.66626 |
| C19orf56 | -0.52968 | 5.725962 | -8.83593 | 8.50E-16 | 9.06E-14 | 25.36528 |
| IRF3 | -0.53552 | 4.517156 | -8.83434 | 8.59E-16 | 9.10E-14 | 25.35557 |
| NDUFB2 | -0.54497 | 7.200546 | -8.83317 | 8.65E-16 | 9.11E-14 | 25.34845 |
| COX6B1 | -0.52133 | 7.119649 | -8.81239 | 9.85E-16 | 1.02E-13 | 25.22174 |
| FUT11 | 0.549086 | 3.247295 | 8.804121 | 1.04E-15 | 1.07E-13 | 25.17134 |
| PPM1L | 0.500825 | 1.152091 | 8.801927 | 1.05E-15 | 1.08E-13 | 25.15798 |
| FAM168A | 0.661643 | 3.206529 | 8.781309 | 1.20E-15 | 1.21E-13 | 25.03242 |
| PSMB3 | -0.51472 | 6.028753 | -8.76929 | 1.29E-15 | 1.25E-13 | 24.95932 |
| ERC1 | 0.54048 | 2.816531 | 8.753106 | 1.43E-15 | 1.35E-13 | 24.86087 |
| NUDT4 | 0.628731 | 2.997526 | 8.752431 | 1.43E-15 | 1.35E-13 | 24.85676 |
| UBXN7 | 0.80109 | 1.991863 | 8.740801 | 1.54E-15 | 1.45E-13 | 24.78609 |
| RNF24 | 0.558498 | 2.180464 | 8.733145 | 1.61E-15 | 1.50E-13 | 24.73958 |
| NUBP2 | -0.53736 | 3.777467 | -8.72024 | 1.75E-15 | 1.61E-13 | 24.66125 |
| RPS25 | -0.53331 | 10.71853 | -8.71537 | 1.80E-15 | 1.65E-13 | 24.63169 |
| C10orf125 | -0.72183 | 4.214237 | -8.70573 | 1.91E-15 | 1.72E-13 | 24.57316 |
| CDK3 | -0.88646 | 1.756531 | -8.69862 | 2.00E-15 | 1.78E-13 | 24.53004 |
| MRPL14 | -0.58343 | 5.800321 | -8.69549 | 2.04E-15 | 1.81E-13 | 24.51107 |
| ETFB | -0.632 | 5.218279 | -8.68036 | 2.24E-15 | 1.93E-13 | 24.41938 |
| FAM160A1 | 0.521816 | 1.214399 | 8.643176 | 2.82E-15 | 2.36E-13 | 24.19429 |
| TRIM44 | 0.614822 | 4.169714 | 8.625417 | 3.15E-15 | 2.56E-13 | 24.08693 |
| IGF2R | 0.52257 | 4.61226 | 8.566783 | 4.53E-15 | 3.54E-13 | 23.73309 |
| MGAT5 | 0.813912 | 2.577731 | 8.565908 | 4.55E-15 | 3.55E-13 | 23.72781 |
| CDKL5 | 0.79457 | 1.13112 | 8.552962 | 4.93E-15 | 3.77E-13 | 23.64982 |
| COX7C | -0.51528 | 9.451737 | -8.5197 | 6.06E-15 | 4.51E-13 | 23.44966 |
| ZC3H13 | 0.562653 | 3.555802 | 8.482574 | 7.61E-15 | 5.40E-13 | 23.22666 |
| HINT2 | -0.5126 | 4.651894 | -8.47149 | 8.15E-15 | 5.76E-13 | 23.16015 |
| NDUFS7 | -0.51535 | 5.159264 | -8.45325 | 9.12E-15 | 6.33E-13 | 23.05078 |
| NOP10 | -0.54024 | 6.939417 | -8.42303 | 1.10E-14 | 7.47E-13 | 22.86983 |
| C17orf56 | -0.5957 | 2.982334 | -8.40904 | 1.20E-14 | 8.04E-13 | 22.78618 |
| MICAL2 | 0.739894 | 3.319463 | 8.373099 | 1.49E-14 | 9.71E-13 | 22.57146 |
| TMEM110-MUSTN1 | 0.900949 | 1.078287 | 8.336044 | 1.87E-14 | 1.18E-12 | 22.35052 |
| BAD | -0.52431 | 4.72008 | -8.31722 | 2.10E-14 | 1.31E-12 | 22.23842 |
| C6orf1 | -0.54332 | 3.709735 | -8.31514 | 2.12E-14 | 1.32E-12 | 22.22605 |
| JOSD2 | -0.67005 | 3.8947 | -8.28693 | 2.52E-14 | 1.55E-12 | 22.05835 |
| ZKSCAN1 | 0.637184 | 2.615372 | 8.269782 | 2.80E-14 | 1.69E-12 | 21.9565 |
| ATP5I | -0.64626 | 7.410312 | -8.25396 | 3.08E-14 | 1.83E-12 | 21.8626 |
| SIVA1 | -0.50674 | 5.008108 | -8.24032 | 3.35E-14 | 1.97E-12 | 21.78177 |
| FDX1L | -0.51276 | 3.372998 | -8.2214 | 3.76E-14 | 2.17E-12 | 21.66968 |
| EXOC6B | 0.677092 | 2.362013 | 8.217985 | 3.84E-14 | 2.20E-12 | 21.64947 |
| PDZD8 | 0.565264 | 2.412368 | 8.215379 | 3.90E-14 | 2.22E-12 | 21.63405 |
| RABAC1 | -0.51853 | 6.051108 | -8.18887 | 4.58E-14 | 2.58E-12 | 21.47728 |
| BST2 | -0.5568 | 6.658597 | -8.18534 | 4.68E-14 | 2.63E-12 | 21.45643 |
| SEPW1 | -0.55889 | 7.404843 | -8.15595 | 5.59E-14 | 3.06E-12 | 21.28291 |
| DPM3 | -0.77638 | 5.904646 | -8.12351 | 6.80E-14 | 3.60E-12 | 21.09172 |
| TTBK2 | 0.518035 | 1.232551 | 8.115824 | 7.12E-14 | 3.74E-12 | 21.04645 |
| C9orf142 | -0.70266 | 3.764026 | -8.10652 | 7.54E-14 | 3.89E-12 | 20.9917 |
| TCEB2 | -0.60028 | 6.643905 | -8.10363 | 7.67E-14 | 3.93E-12 | 20.97468 |
| PTPRCAP | -0.81665 | 4.060071 | -8.06555 | 9.65E-14 | 4.81E-12 | 20.75096 |
| COMTD1 | -0.67586 | 2.611762 | -8.05988 | 9.98E-14 | 4.91E-12 | 20.71773 |
| MRPL41 | -0.69942 | 5.43539 | -8.04821 | 1.07E-13 | 5.21E-12 | 20.64927 |
| RCAN3 | 0.554889 | 2.737465 | 8.043956 | 1.10E-13 | 5.33E-12 | 20.62432 |
| MOBKL1B | 0.613725 | 5.341652 | 8.038039 | 1.14E-13 | 5.49E-12 | 20.58964 |
| TIMM17B | -0.50481 | 3.836396 | -8.02155 | 1.26E-13 | 6.03E-12 | 20.49307 |
| MIF | -0.7141 | 6.410898 | -8.00272 | 1.41E-13 | 6.67E-12 | 20.3829 |
| LRCH3 | 0.52643 | 2.67404 | 7.994835 | 1.48E-13 | 6.94E-12 | 20.3368 |
| AURKAIP1 | -0.5782 | 4.814835 | -7.97514 | 1.66E-13 | 7.64E-12 | 20.22173 |
| RPLP1 | -0.66654 | 10.8077 | -7.9656 | 1.76E-13 | 8.02E-12 | 20.16604 |
| C6orf226 | -0.64995 | 3.341482 | -7.96107 | 1.81E-13 | 8.20E-12 | 20.13965 |
| ETV3 | 0.680218 | 3.597664 | 7.953455 | 1.89E-13 | 8.55E-12 | 20.09523 |
| NRP2 | 0.516473 | 3.709407 | 7.944137 | 2.00E-13 | 8.95E-12 | 20.04091 |
| FEM1B | 0.585017 | 2.917246 | 7.941897 | 2.03E-13 | 9.02E-12 | 20.02786 |
| ATF7IP | 0.611276 | 2.814643 | 7.921048 | 2.30E-13 | 9.95E-12 | 19.90646 |
| MRPL55 | -0.64469 | 3.81949 | -7.90765 | 2.49E-13 | 1.06E-11 | 19.82853 |
| C16orf79 | -0.60202 | 1.735367 | -7.9042 | 2.54E-13 | 1.08E-11 | 19.80846 |
| HIGD2A | -0.55776 | 5.688636 | -7.90013 | 2.60E-13 | 1.11E-11 | 19.78482 |
| REL | 0.822426 | 2.281707 | 7.882614 | 2.89E-13 | 1.21E-11 | 19.68305 |
| TP53I13 | -0.5639 | 3.697127 | -7.88252 | 2.89E-13 | 1.21E-11 | 19.68252 |
| RPL18A | -0.52288 | 9.058778 | -7.86089 | 3.29E-13 | 1.35E-11 | 19.55703 |
| ATL3 | 0.603123 | 2.870009 | 7.853429 | 3.44E-13 | 1.40E-11 | 19.51377 |
| RGP1 | 0.500962 | 3.439949 | 7.845362 | 3.60E-13 | 1.46E-11 | 19.46703 |
| C17orf61 | -0.54335 | 5.765976 | -7.83823 | 3.76E-13 | 1.51E-11 | 19.42572 |
| NBPF24 | 0.575154 | 0.993642 | 7.834672 | 3.84E-13 | 1.54E-11 | 19.40512 |
| HIPK3 | 0.778158 | 3.397921 | 7.822263 | 4.13E-13 | 1.64E-11 | 19.33332 |
| TNFRSF14 | -0.56204 | 4.655644 | -7.80348 | 4.62E-13 | 1.82E-11 | 19.22476 |
| ZC3HAV1L | 0.507068 | 1.855229 | 7.785957 | 5.13E-13 | 1.99E-11 | 19.12356 |
| RPL18 | -0.53981 | 9.172069 | -7.76287 | 5.88E-13 | 2.23E-11 | 18.99042 |
| CHCHD5 | -0.50346 | 3.898154 | -7.73714 | 6.85E-13 | 2.52E-11 | 18.84226 |
| RAB24 | -0.55094 | 3.933124 | -7.73696 | 6.85E-13 | 2.52E-11 | 18.84125 |
| HCST | -0.72327 | 5.128803 | -7.73217 | 7.05E-13 | 2.57E-11 | 18.81369 |
| CNTN1 | 0.607765 | 1.567909 | 7.731562 | 7.08E-13 | 2.57E-11 | 18.81018 |
| PTPLB | 0.794269 | 3.805358 | 7.697383 | 8.66E-13 | 3.08E-11 | 18.61383 |
| CEMP1 | -0.535 | 2.534401 | -7.66013 | 1.08E-12 | 3.71E-11 | 18.40031 |
| MYO9A | 0.589426 | 1.62613 | 7.649955 | 1.14E-12 | 3.92E-11 | 18.34208 |
| EVC | 0.507134 | 2.64641 | 7.623217 | 1.34E-12 | 4.47E-11 | 18.18926 |
| ZBED3 | 0.687047 | 2.274613 | 7.612986 | 1.42E-12 | 4.71E-11 | 18.13085 |
| NBPF1 | 0.502637 | 2.926972 | 7.597528 | 1.56E-12 | 5.04E-11 | 18.04268 |
| GANC | 0.546404 | 3.194226 | 7.558217 | 1.96E-12 | 6.15E-11 | 17.81887 |
| BSCL2 | -0.51346 | 4.060471 | -7.55802 | 1.96E-12 | 6.15E-11 | 17.81773 |
| C19orf71 | -0.52642 | 2.209197 | -7.53961 | 2.18E-12 | 6.82E-11 | 17.71315 |
| EIF4EBP3 | -0.52947 | 3.917442 | -7.53054 | 2.30E-12 | 7.15E-11 | 17.66163 |
| GDPD3 | -0.60205 | 2.461165 | -7.52295 | 2.41E-12 | 7.45E-11 | 17.6186 |
| DUSP23 | -0.6081 | 4.344377 | -7.51363 | 2.54E-12 | 7.83E-11 | 17.56572 |
| PSME2 | -0.5341 | 6.801796 | -7.48584 | 2.99E-12 | 9.01E-11 | 17.40836 |
| C2orf54 | -0.63321 | 2.879439 | -7.4829 | 3.04E-12 | 9.15E-11 | 17.39175 |
| GOLIM4 | 0.617502 | 4.726295 | 7.468516 | 3.30E-12 | 9.75E-11 | 17.31042 |
| MPZL3 | 0.592964 | 2.554744 | 7.461044 | 3.45E-12 | 1.01E-10 | 17.26821 |
| NCOA2 | 0.629995 | 2.224853 | 7.45943 | 3.48E-12 | 1.01E-10 | 17.25909 |
| NDUFA13 | -0.52936 | 7.130307 | -7.4568 | 3.54E-12 | 1.03E-10 | 17.24426 |
| AHNAK | 0.595543 | 7.226378 | 7.44346 | 3.82E-12 | 1.10E-10 | 17.16896 |
| EPOR | -0.55227 | 3.14937 | -7.44214 | 3.85E-12 | 1.10E-10 | 17.16149 |
| LCAT | -0.59823 | 3.691933 | -7.43605 | 3.99E-12 | 1.13E-10 | 17.12719 |
| MFSD10 | -0.5057 | 4.49023 | -7.41828 | 4.42E-12 | 1.24E-10 | 17.02706 |
| ANTXR2 | 0.541732 | 3.654576 | 7.410296 | 4.63E-12 | 1.28E-10 | 16.9821 |
| EGFR | 0.67719 | 3.076278 | 7.381957 | 5.45E-12 | 1.47E-10 | 16.82279 |
| SAP25 | -0.77487 | 2.696718 | -7.36653 | 5.96E-12 | 1.59E-10 | 16.73617 |
| PIDD | -0.55136 | 2.163979 | -7.35872 | 6.24E-12 | 1.65E-10 | 16.69237 |
| ALG11 | 0.555822 | 2.538039 | 7.33956 | 6.97E-12 | 1.82E-10 | 16.58504 |
| SIK2 | 0.546551 | 3.447415 | 7.338545 | 7.01E-12 | 1.82E-10 | 16.57935 |
| PCSK5 | 0.534439 | 2.15517 | 7.335991 | 7.11E-12 | 1.84E-10 | 16.56506 |
| CRIP2 | -0.58386 | 6.21654 | -7.31057 | 8.23E-12 | 2.09E-10 | 16.42288 |
| C19orf60 | -0.63062 | 4.215056 | -7.30732 | 8.39E-12 | 2.12E-10 | 16.40472 |
| C17orf90 | -0.64177 | 3.040445 | -7.30497 | 8.50E-12 | 2.15E-10 | 16.39162 |
| SLFN5 | 0.688004 | 3.476541 | 7.289674 | 9.28E-12 | 2.29E-10 | 16.30624 |
| NFATC2 | 0.696919 | 1.895805 | 7.286134 | 9.47E-12 | 2.33E-10 | 16.28649 |
| PRDX5 | -0.53416 | 7.326312 | -7.28447 | 9.56E-12 | 2.35E-10 | 16.2772 |
| LATS1 | 0.518341 | 2.28079 | 7.281268 | 9.74E-12 | 2.38E-10 | 16.25936 |
| ITGA9 | 0.634353 | 2.400155 | 7.272957 | 1.02E-11 | 2.49E-10 | 16.21304 |
| ZNF192 | 0.542965 | 2.331827 | 7.261796 | 1.09E-11 | 2.63E-10 | 16.15088 |
| C16orf48 | -0.59917 | 3.018295 | -7.24218 | 1.22E-11 | 2.90E-10 | 16.04174 |
| C22orf36 | -0.51129 | 2.067015 | -7.19931 | 1.56E-11 | 3.62E-10 | 15.80382 |
| ECHDC2 | -0.50984 | 4.430537 | -7.19183 | 1.62E-11 | 3.74E-10 | 15.76239 |
| 8-Mar | 0.519979 | 3.210514 | 7.183773 | 1.70E-11 | 3.90E-10 | 15.7178 |
| MAN2A1 | 0.508549 | 2.561669 | 7.167482 | 1.87E-11 | 4.21E-10 | 15.6277 |
| CD52 | -0.69592 | 8.439253 | -7.16281 | 1.92E-11 | 4.30E-10 | 15.60188 |
| ZNF524 | -0.50428 | 2.723454 | -7.15323 | 2.02E-11 | 4.50E-10 | 15.54898 |
| PAM16 | -0.52005 | 3.96555 | -7.14546 | 2.11E-11 | 4.66E-10 | 15.50606 |
| SULT1A2 | -0.51897 | 2.980103 | -7.14269 | 2.15E-11 | 4.72E-10 | 15.4908 |
| SCAND1 | -0.66234 | 3.956926 | -7.14201 | 2.16E-11 | 4.72E-10 | 15.48705 |
| PALM2-AKAP2 | 0.798831 | 1.736119 | 7.133723 | 2.26E-11 | 4.93E-10 | 15.44135 |
| EIF2AK2 | 0.671173 | 3.271977 | 7.131343 | 2.29E-11 | 4.99E-10 | 15.42823 |
| GTF2A1 | 0.691737 | 2.668806 | 7.125377 | 2.37E-11 | 5.13E-10 | 15.39535 |
| TNFRSF10C | 0.79576 | 2.643319 | 7.122285 | 2.41E-11 | 5.21E-10 | 15.37832 |
| HDAC10 | -0.51275 | 2.609104 | -7.1167 | 2.49E-11 | 5.36E-10 | 15.34754 |
| LUC7L | -0.52078 | 4.865376 | -7.10457 | 2.67E-11 | 5.70E-10 | 15.28083 |
| CCNT1 | 0.64029 | 1.902779 | 7.10264 | 2.69E-11 | 5.75E-10 | 15.2702 |
| B3GAT3 | -0.57005 | 2.759119 | -7.08083 | 3.05E-11 | 6.40E-10 | 15.15036 |
| PLA2G4B | -0.92585 | 2.22322 | -7.07209 | 3.20E-11 | 6.68E-10 | 15.10241 |
| RASEF | 0.656198 | 2.113019 | 7.0557 | 3.51E-11 | 7.23E-10 | 15.01252 |
| ROCK2 | 0.523432 | 3.316923 | 7.054122 | 3.54E-11 | 7.28E-10 | 15.00388 |
| MRPL23 | -0.5001 | 5.107391 | -7.04581 | 3.72E-11 | 7.53E-10 | 14.95835 |
| LIME1 | -0.61209 | 2.317476 | -7.04224 | 3.79E-11 | 7.65E-10 | 14.9388 |
| SLC19A1 | -0.50392 | 3.739553 | -7.02842 | 4.10E-11 | 8.23E-10 | 14.86319 |
| ATHL1 | -0.7423 | 4.308506 | -7.0153 | 4.41E-11 | 8.76E-10 | 14.79153 |
| KCNA3 | 0.57675 | 2.164812 | 7.00194 | 4.76E-11 | 9.33E-10 | 14.7186 |
| LNPEP | 0.581706 | 1.493448 | 6.973891 | 5.57E-11 | 1.08E-09 | 14.56575 |
| ZNF444 | -0.50266 | 3.344007 | -6.97266 | 5.60E-11 | 1.08E-09 | 14.55905 |
| TBC1D10C | -0.55863 | 3.409481 | -6.96654 | 5.80E-11 | 1.11E-09 | 14.52573 |
| LOC100128071 | -0.6188 | 1.958814 | -6.93985 | 6.73E-11 | 1.27E-09 | 14.38075 |
| BICC1 | 0.614655 | 2.026474 | 6.919554 | 7.54E-11 | 1.41E-09 | 14.27066 |
| UGCG | 0.681214 | 4.076554 | 6.909339 | 7.99E-11 | 1.49E-09 | 14.21532 |
| C9orf16 | -0.5167 | 4.501446 | -6.90453 | 8.20E-11 | 1.52E-09 | 14.18928 |
| MAN1A2 | 0.525239 | 2.515507 | 6.901886 | 8.32E-11 | 1.54E-09 | 14.17498 |
| LGALS1 | -0.55482 | 8.871735 | -6.87618 | 9.61E-11 | 1.74E-09 | 14.03605 |
| DDR2 | 0.74637 | 2.084045 | 6.867607 | 1.01E-10 | 1.82E-09 | 13.98978 |
| SKIL | 0.617082 | 3.578084 | 6.780849 | 1.63E-10 | 2.76E-09 | 13.52343 |
| ZNF692 | -0.50635 | 3.147629 | -6.78009 | 1.64E-10 | 2.77E-09 | 13.51935 |
| BROX | 0.511553 | 3.614555 | 6.762254 | 1.81E-10 | 3.02E-09 | 13.42393 |
| PANK3 | 0.565933 | 2.063737 | 6.745796 | 1.98E-10 | 3.28E-09 | 13.336 |
| TSPO | -0.52362 | 6.339097 | -6.74258 | 2.01E-10 | 3.33E-09 | 13.31885 |
| IFI27 | -0.57167 | 7.881928 | -6.73915 | 2.05E-10 | 3.39E-09 | 13.30051 |
| COX4I2 | -0.73888 | 4.215895 | -6.734 | 2.11E-10 | 3.47E-09 | 13.27307 |
| RC3H2 | 0.540546 | 2.020211 | 6.706748 | 2.45E-10 | 3.95E-09 | 13.12789 |
| CRYAB | -0.57923 | 4.863977 | -6.68544 | 2.75E-10 | 4.36E-09 | 13.01465 |
| SAMHD1 | 0.539158 | 5.744485 | 6.68531 | 2.76E-10 | 4.36E-09 | 13.01394 |
| PRSS8 | -0.57914 | 5.007306 | -6.6849 | 2.76E-10 | 4.36E-09 | 13.01178 |
| CRIP1 | -0.81993 | 8.327656 | -6.68443 | 2.77E-10 | 4.37E-09 | 13.00927 |
| TMSB10 | -0.53185 | 10.79582 | -6.67487 | 2.92E-10 | 4.57E-09 | 12.95851 |
| MICALCL | 0.560825 | 2.151803 | 6.661788 | 3.13E-10 | 4.87E-09 | 12.88916 |
| LAT | -0.54472 | 3.231713 | -6.65596 | 3.23E-10 | 5.01E-09 | 12.85831 |
| SESN3 | 0.631144 | 1.612447 | 6.646001 | 3.42E-10 | 5.26E-09 | 12.80556 |
| TMED8 | 0.60872 | 1.697001 | 6.641604 | 3.50E-10 | 5.36E-09 | 12.7823 |
| ROR1 | 0.574206 | 2.253235 | 6.630172 | 3.72E-10 | 5.68E-09 | 12.72186 |
| GPSM1 | -0.55711 | 3.201386 | -6.61375 | 4.07E-10 | 6.16E-09 | 12.63516 |
| ELK3 | 0.615326 | 4.082527 | 6.601366 | 4.36E-10 | 6.53E-09 | 12.56985 |
| RAB17 | -0.5323 | 3.522432 | -6.58222 | 4.83E-10 | 7.15E-09 | 12.46903 |
| ZNF141 | 0.525631 | 2.009745 | 6.535032 | 6.24E-10 | 9.01E-09 | 12.22134 |
| EGFL7 | -0.7053 | 5.136285 | -6.51186 | 7.07E-10 | 1.01E-08 | 12.10013 |
| CLIC3 | -0.67937 | 5.523409 | -6.47873 | 8.46E-10 | 1.18E-08 | 11.92722 |
| NPFF | -0.59901 | 1.73962 | -6.46741 | 8.99E-10 | 1.24E-08 | 11.8683 |
| CLMP | 0.589423 | 2.236874 | 6.462846 | 9.21E-10 | 1.27E-08 | 11.84454 |
| DDX21 | 0.578984 | 4.329604 | 6.438704 | 1.05E-09 | 1.42E-08 | 11.7191 |
| CCDC75 | 0.551145 | 3.046777 | 6.429946 | 1.10E-09 | 1.48E-08 | 11.67367 |
| PCDHGB7 | 0.573211 | 2.357073 | 6.422595 | 1.14E-09 | 1.53E-08 | 11.63556 |
| VAMP5 | -0.50744 | 5.984748 | -6.41973 | 1.16E-09 | 1.55E-08 | 11.62071 |
| CYP7B1 | 0.529392 | 1.564416 | 6.419015 | 1.16E-09 | 1.56E-08 | 11.61702 |
| ST8SIA6 | 0.636313 | 1.517081 | 6.380599 | 1.43E-09 | 1.86E-08 | 11.4184 |
| SH3PXD2B | 0.506436 | 2.600487 | 6.349967 | 1.68E-09 | 2.14E-08 | 11.26056 |
| MAN1A1 | 0.568435 | 4.862464 | 6.347521 | 1.71E-09 | 2.16E-08 | 11.24798 |
| SGPP2 | 0.690951 | 2.930679 | 6.345565 | 1.72E-09 | 2.18E-08 | 11.23792 |
| PTPRG | 0.549139 | 2.482803 | 6.336606 | 1.81E-09 | 2.27E-08 | 11.19186 |
| FOSL2 | 0.949078 | 5.352825 | 6.323357 | 1.94E-09 | 2.42E-08 | 11.12384 |
| TCP11L2 | 0.521504 | 3.267937 | 6.269896 | 2.57E-09 | 3.09E-08 | 10.85025 |
| HIGD1B | -0.62889 | 4.934176 | -6.25741 | 2.75E-09 | 3.28E-08 | 10.78655 |
| KIFC2 | -0.50937 | 3.061091 | -6.247 | 2.90E-09 | 3.44E-08 | 10.73355 |
| GNAQ | 0.719347 | 4.781475 | 6.23903 | 3.03E-09 | 3.58E-08 | 10.69296 |
| MSI2 | 0.546569 | 3.160018 | 6.232651 | 3.13E-09 | 3.68E-08 | 10.66052 |
| NAT14 | -0.52765 | 2.813087 | -6.2256 | 3.25E-09 | 3.81E-08 | 10.62467 |
| TMEM125 | -0.51956 | 5.392791 | -6.21199 | 3.49E-09 | 4.05E-08 | 10.5556 |
| IKZF3 | 0.571917 | 1.692876 | 6.203677 | 3.64E-09 | 4.22E-08 | 10.51343 |
| C20orf46 | -0.64763 | 3.449297 | -6.18778 | 3.96E-09 | 4.55E-08 | 10.4329 |
| PCP2 | -0.56569 | 1.533029 | -6.09241 | 6.51E-09 | 7.06E-08 | 9.952694 |
| EFCAB4A | -0.5362 | 3.157682 | -6.08143 | 6.89E-09 | 7.40E-08 | 9.89771 |
| CKB | -0.57355 | 4.852331 | -6.05901 | 7.74E-09 | 8.18E-08 | 9.785647 |
| ZBED6 | 0.692414 | 1.121838 | 6.045023 | 8.32E-09 | 8.71E-08 | 9.715904 |
| MXD1 | 0.591529 | 3.313987 | 6.037731 | 8.64E-09 | 9.00E-08 | 9.679574 |
| TIAF1 | -0.54237 | 1.342492 | -6.03745 | 8.65E-09 | 9.01E-08 | 9.678162 |
| INHBA | 0.797643 | 3.341121 | 6.029662 | 9.01E-09 | 9.33E-08 | 9.639409 |
| NRN1L | -0.50807 | 1.375079 | -6.02703 | 9.13E-09 | 9.41E-08 | 9.626305 |
| KLF2 | 0.819763 | 5.325188 | 5.997707 | 1.06E-08 | 1.07E-07 | 9.480687 |
| GPR15 | 0.562198 | 1.096656 | 5.982464 | 1.15E-08 | 1.15E-07 | 9.405173 |
| C17orf87 | 0.524086 | 3.960843 | 5.875788 | 1.98E-08 | 1.84E-07 | 8.88029 |
| SLC30A1 | 0.529028 | 2.659378 | 5.864883 | 2.09E-08 | 1.93E-07 | 8.826993 |
| KIRREL | 0.556935 | 2.937849 | 5.860565 | 2.14E-08 | 1.97E-07 | 8.805903 |
| VSIG2 | -0.60103 | 4.3007 | -5.84769 | 2.28E-08 | 2.08E-07 | 8.743083 |
| HSPB1 | -0.56593 | 7.534858 | -5.84549 | 2.30E-08 | 2.10E-07 | 8.732391 |
| GPRIN3 | 0.559184 | 1.780361 | 5.80208 | 2.87E-08 | 2.56E-07 | 8.521348 |
| CYP1B1 | 0.673428 | 3.361999 | 5.79125 | 3.03E-08 | 2.68E-07 | 8.468868 |
| S100A14 | -0.53158 | 5.805607 | -5.69867 | 4.81E-08 | 4.06E-07 | 8.022989 |
| ITGA8 | 0.678761 | 3.159202 | 5.67045 | 5.54E-08 | 4.60E-07 | 7.888078 |
| ZBTB16 | 0.781763 | 2.914795 | 5.649606 | 6.14E-08 | 5.02E-07 | 7.788718 |
| ARL5B | 0.649738 | 2.409131 | 5.599434 | 7.86E-08 | 6.26E-07 | 7.550609 |
| UPK3BL | -0.63494 | 4.06997 | -5.53317 | 1.09E-07 | 8.33E-07 | 7.238435 |
| SLIT3 | 0.586818 | 3.805537 | 5.509682 | 1.22E-07 | 9.21E-07 | 7.128384 |
| ITGB6 | 0.562868 | 3.994684 | 5.480462 | 1.40E-07 | 1.04E-06 | 6.991964 |
| CD84 | 0.526663 | 2.390616 | 5.44227 | 1.69E-07 | 1.23E-06 | 6.814439 |
| COL8A1 | 0.567869 | 3.865958 | 5.376954 | 2.31E-07 | 1.62E-06 | 6.512894 |
| GALNT5 | 0.580489 | 2.836935 | 5.333782 | 2.84E-07 | 1.94E-06 | 6.315022 |
| GGTLC1 | -0.60662 | 3.423538 | -5.32215 | 3.00E-07 | 2.04E-06 | 6.26193 |
| DYRK3 | 0.55807 | 2.810815 | 5.268148 | 3.88E-07 | 2.56E-06 | 6.016422 |
| IFI6 | -0.57111 | 7.147623 | -5.2494 | 4.24E-07 | 2.77E-06 | 5.931614 |
| TNNI2 | -0.50276 | 2.615684 | -5.24062 | 4.42E-07 | 2.87E-06 | 5.892002 |
| PALM3 | -0.69608 | 2.468817 | -5.23671 | 4.50E-07 | 2.92E-06 | 5.874368 |
| SCO2 | -0.50011 | 3.639458 | -5.21614 | 4.96E-07 | 3.19E-06 | 5.78173 |
| SLC22A31 | -0.61211 | 3.719824 | -5.20311 | 5.27E-07 | 3.36E-06 | 5.723186 |
| CST6 | -0.55398 | 3.964126 | -5.20023 | 5.34E-07 | 3.40E-06 | 5.710298 |
| TNNC1 | -0.62007 | 5.636651 | -5.19291 | 5.53E-07 | 3.50E-06 | 5.677474 |
| SOD2 | 0.676553 | 7.103484 | 5.181514 | 5.83E-07 | 3.66E-06 | 5.626434 |
| ISG15 | -0.62134 | 5.19316 | -5.14455 | 6.92E-07 | 4.27E-06 | 5.461492 |
| RBM14-RBM4 | 0.600312 | 4.31759 | 5.068117 | 9.86E-07 | 5.86E-06 | 5.123208 |
| NTRK2 | 0.545581 | 1.37422 | 5.021794 | 1.22E-06 | 7.07E-06 | 4.920032 |
| CD163 | 0.533829 | 5.699728 | 4.921307 | 1.92E-06 | 1.06E-05 | 4.484138 |
| F13A1 | 0.676963 | 4.190437 | 4.855696 | 2.58E-06 | 1.39E-05 | 4.20315 |
| FBN1 | 0.573728 | 3.108903 | 4.700461 | 5.12E-06 | 2.57E-05 | 3.549917 |
| NFKBIZ | 0.579387 | 5.368201 | 4.684805 | 5.48E-06 | 2.73E-05 | 3.48495 |
| TNIP3 | 0.569918 | 1.508398 | 4.660962 | 6.08E-06 | 3.00E-05 | 3.386339 |
| AKAP12 | 0.602175 | 3.741851 | 4.660874 | 6.08E-06 | 3.00E-05 | 3.385974 |
| ITLN2 | -0.61148 | 3.301617 | -4.64288 | 6.58E-06 | 3.22E-05 | 3.311823 |
| RPS26 | -0.54974 | 7.858428 | -4.63319 | 6.86E-06 | 3.34E-05 | 3.271986 |
| FGG | 1.34233 | 3.50898 | 4.575386 | 8.79E-06 | 4.18E-05 | 3.035663 |
| SGMS2 | 0.503281 | 4.171731 | 4.509506 | 1.16E-05 | 5.38E-05 | 2.769195 |
| DKK2 | 0.511574 | 2.263025 | 4.490571 | 1.26E-05 | 5.76E-05 | 2.693179 |
| MMRN1 | 0.626139 | 3.133582 | 4.486964 | 1.28E-05 | 5.84E-05 | 2.678726 |
| SLIT2 | 0.563426 | 4.034495 | 4.485099 | 1.29E-05 | 5.88E-05 | 2.671257 |
| GNLY | -0.58625 | 4.383 | -4.44398 | 1.53E-05 | 6.85E-05 | 2.507222 |
| COL14A1 | 0.656824 | 3.333136 | 4.405303 | 1.80E-05 | 7.92E-05 | 2.354026 |
| RPL37 | 0.527951 | 6.919885 | 4.403347 | 1.82E-05 | 7.97E-05 | 2.346304 |
| TNFAIP3 | 0.553328 | 4.658743 | 4.377617 | 2.02E-05 | 8.77E-05 | 2.245028 |
| S100A8 | 0.619874 | 6.886785 | 4.351589 | 2.25E-05 | 9.66E-05 | 2.143063 |
| FGA | 0.539191 | 1.180313 | 4.332027 | 2.44E-05 | 0.000104 | 2.066749 |
| GSTT2B | -0.67161 | 1.137626 | -4.28275 | 2.99E-05 | 0.000125 | 1.875741 |
| C1orf15-NBL1 | -0.7616 | 1.705907 | -4.2085 | 4.04E-05 | 0.000163 | 1.591345 |
| VWF | 0.565973 | 5.667752 | 4.156753 | 4.97E-05 | 0.000197 | 1.395532 |
| DEFB1 | 0.841767 | 2.678687 | 4.132293 | 5.48E-05 | 0.000215 | 1.303669 |
| CLC | 0.798707 | 1.668412 | 4.128018 | 5.57E-05 | 0.000219 | 1.287661 |
| PTGS2 | 0.677742 | 4.678069 | 4.112838 | 5.92E-05 | 0.00023 | 1.230923 |
| CXCR2 | 0.5659 | 2.074637 | 4.031272 | 8.16E-05 | 0.000307 | 0.929038 |
| RETN | -0.76657 | 5.01806 | -4.00612 | 9.00E-05 | 0.000335 | 0.836971 |
| SERPINE1 | 0.780021 | 3.602231 | 4.003204 | 9.10E-05 | 0.000338 | 0.826318 |
| PLA2G1B | -0.56208 | 4.512706 | -3.95851 | 0.000108 | 0.000394 | 0.664004 |
| CXCR1 | 0.511542 | 1.358138 | 3.852061 | 0.000162 | 0.00057 | 0.283559 |
| IL7R | 0.545024 | 4.454189 | 3.834805 | 0.000173 | 0.000603 | 0.222713 |
| PEBP4 | -0.50959 | 6.408788 | -3.82946 | 0.000177 | 0.000613 | 0.203897 |
| DMBT1 | 0.646007 | 4.60461 | 3.729514 | 0.000256 | 0.000858 | -0.14351 |
| FCGR3B | 0.597656 | 3.552424 | 3.700442 | 0.000285 | 0.000945 | -0.24309 |
| FCN1 | 0.509468 | 3.858225 | 3.69323 | 0.000293 | 0.000968 | -0.26769 |
| NCOA7 | 0.50115 | 5.418927 | 3.645109 | 0.000349 | 0.001133 | -0.43078 |
| EGR3 | 0.632019 | 3.503981 | 3.632828 | 0.000365 | 0.001177 | -0.4721 |
| C11orf96 | 0.636829 | 5.413953 | 3.631302 | 0.000367 | 0.001182 | -0.47723 |
| SFTPC | -0.56685 | 13.31754 | -3.59224 | 0.000422 | 0.001338 | -0.60782 |
| LIF | 0.70294 | 3.180171 | 3.560481 | 0.000473 | 0.001483 | -0.71311 |
| THBS1 | 0.703367 | 5.818655 | 3.535545 | 0.000517 | 0.001609 | -0.7952 |
| MAPK15 | -0.56642 | 2.628405 | -3.53033 | 0.000526 | 0.001635 | -0.81232 |
| ATF3 | 0.653401 | 5.682214 | 3.453108 | 0.00069 | 0.00209 | -1.06302 |
| CDKN1A | 0.513288 | 6.048804 | 3.433921 | 0.000737 | 0.002216 | -1.12456 |
| CCDC80 | 0.613914 | 4.747621 | 3.397086 | 0.000837 | 0.002483 | -1.24186 |
| CDRT4 | -0.52263 | 0.718985 | -3.39316 | 0.000848 | 0.002511 | -1.2543 |
| NAMPT | 0.52974 | 6.021616 | 3.389062 | 0.00086 | 0.002542 | -1.26727 |
| CSRNP1 | 0.504579 | 4.98976 | 3.375862 | 0.0009 | 0.002646 | -1.30895 |
| MAFF | 0.518796 | 4.646599 | 3.366039 | 0.000931 | 0.002723 | -1.33987 |
| RPL21 | -1.08269 | 2.712861 | -3.36154 | 0.000945 | 0.00276 | -1.35401 |
| HAS2 | 0.614076 | 2.713587 | 3.268191 | 0.001295 | 0.003661 | -1.64355 |
| S100A12 | 0.684847 | 2.858183 | 3.233107 | 0.001455 | 0.004058 | -1.7505 |
| FOSB | 0.875994 | 6.933715 | 3.185233 | 0.001703 | 0.004647 | -1.89478 |
| FOLR3 | -0.52473 | 2.107258 | -3.16945 | 0.001793 | 0.004859 | -1.94193 |
| UPK3B | -0.54256 | 5.348111 | -3.15376 | 0.001887 | 0.005086 | -1.98859 |
| EGR1 | 0.627732 | 7.614101 | 3.152009 | 0.001898 | 0.005112 | -1.99379 |
| C4orf48 | 0.528589 | 3.584284 | 3.114811 | 0.00214 | 0.005683 | -2.10353 |
| SOCS3 | 0.574051 | 6.663382 | 3.090219 | 0.002316 | 0.006097 | -2.17543 |
| AREG | 0.535872 | 3.695566 | 2.9322 | 0.0038 | 0.009467 | -2.62521 |
| FOSL1 | 0.60828 | 2.497918 | 2.913669 | 0.004022 | 0.009962 | -2.67656 |
| NR4A3 | 0.6295 | 3.911718 | 2.820633 | 0.005327 | 0.012743 | -2.92985 |
| CCL24 | -0.61763 | 2.509225 | -2.81654 | 0.005392 | 0.01288 | -2.94082 |
| SELE | 0.635219 | 2.601504 | 2.658794 | 0.008544 | 0.019327 | -3.35248 |
| IGJ | 0.527077 | 9.035088 | 2.588633 | 0.010418 | 0.023036 | -3.52853 |
| CAPS | -0.60137 | 3.631634 | -2.54672 | 0.011706 | 0.025467 | -3.63162 |
| RND1 | 0.628126 | 4.343123 | 2.470182 | 0.014429 | 0.030606 | -3.81582 |
| SCGB3A1 | -0.76403 | 6.808949 | -2.43388 | 0.015908 | 0.033264 | -3.90135 |
| IL6 | 0.732456 | 5.365206 | 2.408187 | 0.017034 | 0.035315 | -3.96118 |
| IL8 | 0.644591 | 5.18433 | 2.360406 | 0.019318 | 0.039376 | -4.07084 |
|  |  |  |  |  |  |  |

Supplementary Table1: DEGs in COPD samples compared to normal samples in the GSE57148 dataset.

| Terms | Counts | GeneRatio | BgRatio | pValue | FDR | foldEnrichment | geneID | geneSymbol | Category |
| --- | --- | --- | --- | --- | --- | --- | --- | --- | --- |
| GO:0098542~defense response to other organism | 11 | 11/43 | 498/18012 | 1.67E-08 | 3.20E-05 | 9.252452 | ENSG00000187608/ENSG00000118503/ENSG00000115523/ENSG00000055332/ENSG00000130303/ENSG00000171560/ENSG00000187908/ENSG00000136244/ENSG00000174775/ENSG00000164825/ENSG00000157873 | ISG15/TNFAIP3/GNLY/EIF2AK2/BST2/FGA/DMBT1/IL6/HRAS/DEFB1/TNFRSF14 | GO_BP |
| GO:0048872~homeostasis of number of cells | 8 | 8/43 | 246/18012 | 1.04E-07 | 9.94E-05 | 13.62223 | ENSG00000187608/ENSG00000118503/ENSG00000168685/ENSG00000136244/ENSG00000240972/ENSG00000180871/ENSG00000122641/ENSG00000213658 | ISG15/TNFAIP3/IL7R/IL6/MIF/CXCR2/INHBA/LAT | GO_BP |
| GO:0050679~positive regulation of epithelial cell proliferation | 7 | 7/43 | 201/18012 | 4.45E-07 | 0.000181 | 14.58799 | ENSG00000118503/ENSG00000106178/ENSG00000174775/ENSG00000109321/ENSG00000146648/ENSG00000119508/ENSG00000118257 | TNFAIP3/CCL24/HRAS/AREG/EGFR/NR4A3/NRP2 | GO_BP |
| GO:0060135~maternal process involved in female pregnancy | 5 | 5/43 | 65/18012 | 4.53E-07 | 0.000181 | 32.22182 | ENSG00000073756/ENSG00000128342/ENSG00000139574/ENSG00000267281/ENSG00000187266 | PTGS2/LIF/NPFF/AC023509.3/EPOR | GO_BP |
| GO:0051249~regulation of lymphocyte activation | 9 | 9/43 | 415/18012 | 4.73E-07 | 0.000181 | 9.084225 | ENSG00000118503/ENSG00000144802/ENSG00000168685/ENSG00000136244/ENSG00000240972/ENSG00000101096/ENSG00000122641/ENSG00000157873/ENSG00000213658 | TNFAIP3/NFKBIZ/IL7R/IL6/MIF/NFATC2/INHBA/TNFRSF14/LAT | GO_BP |
| GO:0046879~hormone secretion | 8 | 8/43 | 314/18012 | 6.66E-07 | 0.000187 | 10.6722 | ENSG00000171560/ENSG00000136244/ENSG00000122641/ENSG00000128342/ENSG00000139574/ENSG00000267281/ENSG00000104918/ENSG00000146648 | FGA/IL6/INHBA/LIF/NPFF/AC023509.3/RETN/EGFR | GO_BP |
| GO:0032103~positive regulation of response to external stimulus | 8 | 8/43 | 315/18012 | 6.82E-07 | 0.000187 | 10.63832 | ENSG00000144802/ENSG00000073756/ENSG00000106178/ENSG00000136244/ENSG00000240972/ENSG00000145147/ENSG00000180871/ENSG00000146648 | NFKBIZ/PTGS2/CCL24/IL6/MIF/SLIT2/CXCR2/EGFR | GO_BP |
| GO:0009914~hormone transport | 8 | 8/43 | 324/18012 | 8.43E-07 | 0.000202 | 10.34281 | ENSG00000171560/ENSG00000136244/ENSG00000122641/ENSG00000128342/ENSG00000139574/ENSG00000267281/ENSG00000104918/ENSG00000146648 | FGA/IL6/INHBA/LIF/NPFF/AC023509.3/RETN/EGFR | GO_BP |
| GO:0042113~B cell activation | 7 | 7/43 | 241/18012 | 1.50E-06 | 0.000243 | 12.16675 | ENSG00000118503/ENSG00000130303/ENSG00000168685/ENSG00000136244/ENSG00000240972/ENSG00000101096/ENSG00000122641 | TNFAIP3/BST2/IL7R/IL6/MIF/NFATC2/INHBA | GO_BP |
| GO:0002718~regulation of cytokine production involved in immune response | 5 | 5/43 | 84/18012 | 1.64E-06 | 0.000243 | 24.93355 | ENSG00000130303/ENSG00000136244/ENSG00000240972/ENSG00000119508/ENSG00000157873 | BST2/IL6/MIF/NR4A3/TNFRSF14 | GO_BP |
| GO:0048660~regulation of smooth muscle cell proliferation | 6 | 6/43 | 155/18012 | 1.73E-06 | 0.000243 | 16.21485 | ENSG00000118503/ENSG00000073756/ENSG00000136244/ENSG00000105835/ENSG00000146648/ENSG00000119508 | TNFAIP3/PTGS2/IL6/NAMPT/EGFR/NR4A3 | GO_BP |
| GO:0018108~peptidyl-tyrosine phosphorylation | 8 | 8/43 | 359/18012 | 1.82E-06 | 0.000243 | 9.334456 | ENSG00000184557/ENSG00000055332/ENSG00000136244/ENSG00000240972/ENSG00000109321/ENSG00000128342/ENSG00000146648/ENSG00000157873 | SOCS3/EIF2AK2/IL6/MIF/AREG/LIF/EGFR/TNFRSF14 | GO_BP |
| GO:0001776~leukocyte homeostasis | 5 | 5/43 | 86/18012 | 1.84E-06 | 0.000243 | 24.3537 | ENSG00000118503/ENSG00000136244/ENSG00000240972/ENSG00000180871/ENSG00000213658 | TNFAIP3/IL6/MIF/CXCR2/LAT | GO_BP |
| GO:0048659~smooth muscle cell proliferation | 6 | 6/43 | 157/18012 | 1.86E-06 | 0.000243 | 16.0083 | ENSG00000118503/ENSG00000073756/ENSG00000136244/ENSG00000105835/ENSG00000146648/ENSG00000119508 | TNFAIP3/PTGS2/IL6/NAMPT/EGFR/NR4A3 | GO_BP |
| GO:0018212~peptidyl-tyrosine modification | 8 | 8/43 | 362/18012 | 1.93E-06 | 0.000243 | 9.257099 | ENSG00000184557/ENSG00000055332/ENSG00000136244/ENSG00000240972/ENSG00000109321/ENSG00000128342/ENSG00000146648/ENSG00000157873 | SOCS3/EIF2AK2/IL6/MIF/AREG/LIF/EGFR/TNFRSF14 | GO_BP |
| GO:0050730~regulation of peptidyl-tyrosine phosphorylation | 7 | 7/43 | 252/18012 | 2.02E-06 | 0.000243 | 11.63566 | ENSG00000184557/ENSG00000136244/ENSG00000240972/ENSG00000109321/ENSG00000128342/ENSG00000146648/ENSG00000157873 | SOCS3/IL6/MIF/AREG/LIF/EGFR/TNFRSF14 | GO_BP |
| GO:0042742~defense response to bacterium | 7 | 7/43 | 259/18012 | 2.43E-06 | 0.000274 | 11.32118 | ENSG00000187608/ENSG00000115523/ENSG00000171560/ENSG00000187908/ENSG00000136244/ENSG00000164825/ENSG00000157873 | ISG15/GNLY/FGA/DMBT1/IL6/DEFB1/TNFRSF14 | GO_BP |
| GO:0046883~regulation of hormone secretion | 7 | 7/43 | 268/18012 | 3.04E-06 | 0.000324 | 10.94099 | ENSG00000171560/ENSG00000122641/ENSG00000128342/ENSG00000139574/ENSG00000267281/ENSG00000104918/ENSG00000146648 | FGA/INHBA/LIF/NPFF/AC023509.3/RETN/EGFR | GO_BP |
| GO:0048661~positive regulation of smooth muscle cell proliferation | 5 | 5/43 | 97/18012 | 3.34E-06 | 0.000337 | 21.59194 | ENSG00000073756/ENSG00000136244/ENSG00000105835/ENSG00000146648/ENSG00000119508 | PTGS2/IL6/NAMPT/EGFR/NR4A3 | GO_BP |
| GO:0002697~regulation of immune effector process | 8 | 8/43 | 395/18012 | 3.69E-06 | 0.000354 | 8.483721 | ENSG00000118503/ENSG00000130303/ENSG00000144802/ENSG00000168685/ENSG00000136244/ENSG00000240972/ENSG00000119508/ENSG00000157873 | TNFAIP3/BST2/NFKBIZ/IL7R/IL6/MIF/NR4A3/TNFRSF14 | GO_BP |
| GO:0002367~cytokine production involved in immune response | 5 | 5/43 | 102/18012 | 4.28E-06 | 0.000391 | 20.53352 | ENSG00000130303/ENSG00000136244/ENSG00000240972/ENSG00000119508/ENSG00000157873 | BST2/IL6/MIF/NR4A3/TNFRSF14 | GO_BP |
| GO:0071887~leukocyte apoptotic process | 5 | 5/43 | 104/18012 | 4.71E-06 | 0.000395 | 20.13864 | ENSG00000168685/ENSG00000136244/ENSG00000240972/ENSG00000180871/ENSG00000119508 | IL7R/IL6/MIF/CXCR2/NR4A3 | GO_BP |
| GO:0002250~adaptive immune response | 8 | 8/43 | 410/18012 | 4.86E-06 | 0.000395 | 8.173341 | ENSG00000118503/ENSG00000171560/ENSG00000144802/ENSG00000168685/ENSG00000136244/ENSG00000174775/ENSG00000157873/ENSG00000213658 | TNFAIP3/FGA/NFKBIZ/IL7R/IL6/HRAS/TNFRSF14/LAT | GO_BP |
| GO:0033138~positive regulation of peptidyl-serine phosphorylation | 5 | 5/43 | 105/18012 | 4.94E-06 | 0.000395 | 19.94684 | ENSG00000073756/ENSG00000136244/ENSG00000240972/ENSG00000128342/ENSG00000146648 | PTGS2/IL6/MIF/LIF/EGFR | GO_BP |
| GO:0050731~positive regulation of peptidyl-tyrosine phosphorylation | 6 | 6/43 | 189/18012 | 5.44E-06 | 0.000418 | 13.2979 | ENSG00000184557/ENSG00000136244/ENSG00000240972/ENSG00000109321/ENSG00000128342/ENSG00000157873 | SOCS3/IL6/MIF/AREG/LIF/TNFRSF14 | GO_BP |
| GO:0002685~regulation of leukocyte migration | 6 | 6/43 | 192/18012 | 5.96E-06 | 0.00042 | 13.09012 | ENSG00000106178/ENSG00000136244/ENSG00000240972/ENSG00000145147/ENSG00000180871/ENSG00000157873 | CCL24/IL6/MIF/SLIT2/CXCR2/TNFRSF14 | GO_BP |
| GO:0070661~leukocyte proliferation | 7 | 7/43 | 297/18012 | 5.98E-06 | 0.00042 | 9.87268 | ENSG00000118503/ENSG00000130303/ENSG00000168685/ENSG00000136244/ENSG00000240972/ENSG00000101096/ENSG00000157873 | TNFAIP3/BST2/IL7R/IL6/MIF/NFATC2/TNFRSF14 | GO_BP |
| GO:0007565~female pregnancy | 6 | 6/43 | 193/18012 | 6.14E-06 | 0.00042 | 13.02229 | ENSG00000073756/ENSG00000128342/ENSG00000105835/ENSG00000139574/ENSG00000267281/ENSG00000187266 | PTGS2/LIF/NAMPT/NPFF/AC023509.3/EPOR | GO_BP |
| GO:0048608~reproductive structure development | 8 | 8/43 | 431/18012 | 7.01E-06 | 0.000461 | 7.775104 | ENSG00000184557/ENSG00000073756/ENSG00000145147/ENSG00000122641/ENSG00000128342/ENSG00000104918/ENSG00000146648/ENSG00000187266 | SOCS3/PTGS2/SLIT2/INHBA/LIF/RETN/EGFR/EPOR | GO_BP |
| GO:0061458~reproductive system development | 8 | 8/43 | 434/18012 | 7.37E-06 | 0.000461 | 7.721359 | ENSG00000184557/ENSG00000073756/ENSG00000145147/ENSG00000122641/ENSG00000128342/ENSG00000104918/ENSG00000146648/ENSG00000187266 | SOCS3/PTGS2/SLIT2/INHBA/LIF/RETN/EGFR/EPOR | GO_BP |
| GO:0002440~production of molecular mediator of immune response | 6 | 6/43 | 200/18012 | 7.53E-06 | 0.000461 | 12.56651 | ENSG00000130303/ENSG00000168685/ENSG00000136244/ENSG00000240972/ENSG00000119508/ENSG00000157873 | BST2/IL7R/IL6/MIF/NR4A3/TNFRSF14 | GO_BP |
| GO:0002696~positive regulation of leukocyte activation | 7 | 7/43 | 310/18012 | 7.92E-06 | 0.000461 | 9.458665 | ENSG00000144802/ENSG00000168685/ENSG00000136244/ENSG00000240972/ENSG00000101096/ENSG00000119508/ENSG00000157873 | NFKBIZ/IL7R/IL6/MIF/NFATC2/NR4A3/TNFRSF14 | GO_BP |
| GO:0050864~regulation of B cell activation | 5 | 5/43 | 116/18012 | 8.04E-06 | 0.000461 | 18.05533 | ENSG00000118503/ENSG00000136244/ENSG00000240972/ENSG00000101096/ENSG00000122641 | TNFAIP3/IL6/MIF/NFATC2/INHBA | GO_BP |
| GO:0002720~positive regulation of cytokine production involved in immune response | 4 | 4/43 | 54/18012 | 8.16E-06 | 0.000461 | 31.02842 | ENSG00000136244/ENSG00000240972/ENSG00000119508/ENSG00000157873 | IL6/MIF/NR4A3/TNFRSF14 | GO_BP |
| GO:0097529~myeloid leukocyte migration | 6 | 6/43 | 205/18012 | 8.67E-06 | 0.000475 | 12.26001 | ENSG00000163464/ENSG00000106178/ENSG00000136244/ENSG00000240972/ENSG00000145147/ENSG00000180871 | CXCR1/CCL24/IL6/MIF/SLIT2/CXCR2 | GO_BP |
| GO:0050867~positive regulation of cell activation | 7 | 7/43 | 322/18012 | 1.01E-05 | 0.000539 | 9.106168 | ENSG00000144802/ENSG00000168685/ENSG00000136244/ENSG00000240972/ENSG00000101096/ENSG00000119508/ENSG00000157873 | NFKBIZ/IL7R/IL6/MIF/NFATC2/NR4A3/TNFRSF14 | GO_BP |
| GO:0002683~negative regulation of immune system process | 8 | 8/43 | 455/18012 | 1.04E-05 | 0.000539 | 7.364988 | ENSG00000118503/ENSG00000130303/ENSG00000168685/ENSG00000240972/ENSG00000145147/ENSG00000180871/ENSG00000122641/ENSG00000157873 | TNFAIP3/BST2/IL7R/MIF/SLIT2/CXCR2/INHBA/TNFRSF14 | GO_BP |
| GO:0019722~calcium-mediated signaling | 6 | 6/43 | 215/18012 | 1.14E-05 | 0.000574 | 11.68978 | ENSG00000163464/ENSG00000101096/ENSG00000164825/ENSG00000180871/ENSG00000146648/ENSG00000213658 | CXCR1/NFATC2/DEFB1/CXCR2/EGFR/LAT | GO_BP |
| GO:0023061~signal release | 8 | 8/43 | 463/18012 | 1.18E-05 | 0.00058 | 7.237732 | ENSG00000171560/ENSG00000136244/ENSG00000122641/ENSG00000128342/ENSG00000139574/ENSG00000267281/ENSG00000104918/ENSG00000146648 | FGA/IL6/INHBA/LIF/NPFF/AC023509.3/RETN/EGFR | GO_BP |
| GO:0050708~regulation of protein secretion | 8 | 8/43 | 465/18012 | 1.22E-05 | 0.000584 | 7.206602 | ENSG00000118503/ENSG00000171560/ENSG00000136244/ENSG00000240972/ENSG00000139574/ENSG00000267281/ENSG00000146648/ENSG00000157873 | TNFAIP3/FGA/IL6/MIF/NPFF/AC023509.3/EGFR/TNFRSF14 | GO_BP |
| GO:0030595~leukocyte chemotaxis | 6 | 6/43 | 220/18012 | 1.30E-05 | 0.000596 | 11.4241 | ENSG00000163464/ENSG00000106178/ENSG00000136244/ENSG00000240972/ENSG00000145147/ENSG00000180871 | CXCR1/CCL24/IL6/MIF/SLIT2/CXCR2 | GO_BP |
| GO:0070663~regulation of leukocyte proliferation | 6 | 6/43 | 221/18012 | 1.33E-05 | 0.000596 | 11.37241 | ENSG00000118503/ENSG00000130303/ENSG00000136244/ENSG00000240972/ENSG00000101096/ENSG00000157873 | TNFAIP3/BST2/IL6/MIF/NFATC2/TNFRSF14 | GO_BP |
| GO:1903706~regulation of hemopoiesis | 8 | 8/43 | 471/18012 | 1.34E-05 | 0.000596 | 7.114798 | ENSG00000187608/ENSG00000055332/ENSG00000144802/ENSG00000168685/ENSG00000101096/ENSG00000122641/ENSG00000128342/ENSG00000119508 | ISG15/EIF2AK2/NFKBIZ/IL7R/NFATC2/INHBA/LIF/NR4A3 | GO_BP |
| GO:0033002~muscle cell proliferation | 6 | 6/43 | 223/18012 | 1.40E-05 | 0.000597 | 11.27041 | ENSG00000118503/ENSG00000073756/ENSG00000136244/ENSG00000105835/ENSG00000146648/ENSG00000119508 | TNFAIP3/PTGS2/IL6/NAMPT/EGFR/NR4A3 | GO_BP |
| GO:0044706~multi-multicellular organism process | 6 | 6/43 | 223/18012 | 1.40E-05 | 0.000597 | 11.27041 | ENSG00000073756/ENSG00000128342/ENSG00000105835/ENSG00000139574/ENSG00000267281/ENSG00000187266 | PTGS2/LIF/NAMPT/NPFF/AC023509.3/EPOR | GO_BP |
| GO:0002791~regulation of peptide secretion | 8 | 8/43 | 493/18012 | 1.86E-05 | 0.00074 | 6.797302 | ENSG00000118503/ENSG00000171560/ENSG00000136244/ENSG00000240972/ENSG00000139574/ENSG00000267281/ENSG00000146648/ENSG00000157873 | TNFAIP3/FGA/IL6/MIF/NPFF/AC023509.3/EGFR/TNFRSF14 | GO_BP |
| GO:0002438~acute inflammatory response to antigenic stimulus | 3 | 3/43 | 22/18012 | 1.89E-05 | 0.00074 | 57.12051 | ENSG00000180871/ENSG00000139574/ENSG00000267281 | CXCR2/NPFF/AC023509.3 | GO_BP |
| GO:0032102~negative regulation of response to external stimulus | 7 | 7/43 | 355/18012 | 1.91E-05 | 0.00074 | 8.259679 | ENSG00000184557/ENSG00000118503/ENSG00000171560/ENSG00000240972/ENSG00000145147/ENSG00000139574/ENSG00000267281 | SOCS3/TNFAIP3/FGA/MIF/SLIT2/NPFF/AC023509.3 | GO_BP |
| GO:0002700~regulation of production of molecular mediator of immune response | 5 | 5/43 | 139/18012 | 1.94E-05 | 0.00074 | 15.06776 | ENSG00000130303/ENSG00000136244/ENSG00000240972/ENSG00000119508/ENSG00000157873 | BST2/IL6/MIF/NR4A3/TNFRSF14 | GO_BP |
| GO:0033135~regulation of peptidyl-serine phosphorylation | 5 | 5/43 | 139/18012 | 1.94E-05 | 0.00074 | 15.06776 | ENSG00000073756/ENSG00000136244/ENSG00000240972/ENSG00000128342/ENSG00000146648 | PTGS2/IL6/MIF/LIF/EGFR | GO_BP |
| GO:0002446~neutrophil mediated immunity | 8 | 8/43 | 497/18012 | 1.97E-05 | 0.00074 | 6.742595 | ENSG00000130303/ENSG00000163464/ENSG00000136244/ENSG00000240972/ENSG00000180871/ENSG00000104918/ENSG00000197081/ENSG00000162747 | BST2/CXCR1/IL6/MIF/CXCR2/RETN/IGF2R/FCGR3B | GO_BP |
| GO:0046888~negative regulation of hormone secretion | 4 | 4/43 | 68/18012 | 2.05E-05 | 0.00075 | 24.64022 | ENSG00000122641/ENSG00000128342/ENSG00000139574/ENSG00000267281 | INHBA/LIF/NPFF/AC023509.3 | GO_BP |
| GO:0051607~defense response to virus | 6 | 6/43 | 239/18012 | 2.07E-05 | 0.00075 | 10.51591 | ENSG00000187608/ENSG00000118503/ENSG00000055332/ENSG00000130303/ENSG00000187908/ENSG00000136244 | ISG15/TNFAIP3/EIF2AK2/BST2/DMBT1/IL6 | GO_BP |
| GO:0050678~regulation of epithelial cell proliferation | 7 | 7/43 | 361/18012 | 2.12E-05 | 0.000754 | 8.122399 | ENSG00000118503/ENSG00000106178/ENSG00000174775/ENSG00000109321/ENSG00000146648/ENSG00000119508/ENSG00000118257 | TNFAIP3/CCL24/HRAS/AREG/EGFR/NR4A3/NRP2 | GO_BP |
| GO:0042698~ovulation cycle | 4 | 4/43 | 69/18012 | 2.17E-05 | 0.000758 | 24.28311 | ENSG00000145147/ENSG00000122641/ENSG00000104918/ENSG00000146648 | SLIT2/INHBA/RETN/EGFR | GO_BP |
| GO:0050729~positive regulation of inflammatory response | 5 | 5/43 | 145/18012 | 2.37E-05 | 0.000813 | 14.44427 | ENSG00000144802/ENSG00000073756/ENSG00000106178/ENSG00000136244/ENSG00000146648 | NFKBIZ/PTGS2/CCL24/IL6/EGFR | GO_BP |
| GO:0051384~response to glucocorticoid | 5 | 5/43 | 146/18012 | 2.45E-05 | 0.000819 | 14.34533 | ENSG00000073756/ENSG00000136244/ENSG00000145147/ENSG00000109321/ENSG00000146648 | PTGS2/IL6/SLIT2/AREG/EGFR | GO_BP |
| GO:0046697~decidualization | 3 | 3/43 | 24/18012 | 2.48E-05 | 0.000819 | 52.36047 | ENSG00000073756/ENSG00000128342/ENSG00000187266 | PTGS2/LIF/EPOR | GO_BP |
| GO:0150076~neuroinflammatory response | 4 | 4/43 | 73/18012 | 2.72E-05 | 0.000873 | 22.95253 | ENSG00000073756/ENSG00000136244/ENSG00000105835/ENSG00000146648 | PTGS2/IL6/NAMPT/EGFR | GO_BP |
| GO:0022409~positive regulation of cell-cell adhesion | 6 | 6/43 | 251/18012 | 2.73E-05 | 0.000873 | 10.01316 | ENSG00000171560/ENSG00000144802/ENSG00000168685/ENSG00000136244/ENSG00000119508/ENSG00000157873 | FGA/NFKBIZ/IL7R/IL6/NR4A3/TNFRSF14 | GO_BP |
| GO:0001890~placenta development | 5 | 5/43 | 152/18012 | 2.98E-05 | 0.000936 | 13.77907 | ENSG00000184557/ENSG00000073756/ENSG00000128342/ENSG00000146648/ENSG00000187266 | SOCS3/PTGS2/LIF/EGFR/EPOR | GO_BP |
| GO:0002526~acute inflammatory response | 5 | 5/43 | 158/18012 | 3.59E-05 | 0.001086 | 13.25581 | ENSG00000073756/ENSG00000136244/ENSG00000180871/ENSG00000139574/ENSG00000267281 | PTGS2/IL6/CXCR2/NPFF/AC023509.3 | GO_BP |
| GO:0002819~regulation of adaptive immune response | 5 | 5/43 | 158/18012 | 3.59E-05 | 0.001086 | 13.25581 | ENSG00000118503/ENSG00000144802/ENSG00000168685/ENSG00000136244/ENSG00000157873 | TNFAIP3/NFKBIZ/IL7R/IL6/TNFRSF14 | GO_BP |
| GO:0051251~positive regulation of lymphocyte activation | 6 | 6/43 | 264/18012 | 3.62E-05 | 0.001086 | 9.520085 | ENSG00000144802/ENSG00000168685/ENSG00000136244/ENSG00000240972/ENSG00000101096/ENSG00000157873 | NFKBIZ/IL7R/IL6/MIF/NFATC2/TNFRSF14 | GO_BP |
| GO:1903532~positive regulation of secretion by cell | 7 | 7/43 | 398/18012 | 3.96E-05 | 0.001168 | 7.367302 | ENSG00000171560/ENSG00000136244/ENSG00000240972/ENSG00000122641/ENSG00000104918/ENSG00000146648/ENSG00000157873 | FGA/IL6/MIF/INHBA/RETN/EGFR/TNFRSF14 | GO_BP |
| GO:0031960~response to corticosteroid | 5 | 5/43 | 162/18012 | 4.04E-05 | 0.001174 | 12.92851 | ENSG00000073756/ENSG00000136244/ENSG00000145147/ENSG00000109321/ENSG00000146648 | PTGS2/IL6/SLIT2/AREG/EGFR | GO_BP |
| GO:0043900~regulation of multi-organism process | 7 | 7/43 | 404/18012 | 4.35E-05 | 0.001246 | 7.257886 | ENSG00000187608/ENSG00000118503/ENSG00000055332/ENSG00000130303/ENSG00000240972/ENSG00000122641/ENSG00000197081 | ISG15/TNFAIP3/EIF2AK2/BST2/MIF/INHBA/IGF2R | GO_BP |
| GO:2000106~regulation of leukocyte apoptotic process | 4 | 4/43 | 83/18012 | 4.51E-05 | 0.001272 | 20.18717 | ENSG00000168685/ENSG00000240972/ENSG00000180871/ENSG00000119508 | IL7R/MIF/CXCR2/NR4A3 | GO_BP |
| GO:0050727~regulation of inflammatory response | 7 | 7/43 | 411/18012 | 4.85E-05 | 0.001349 | 7.134273 | ENSG00000184557/ENSG00000118503/ENSG00000144802/ENSG00000073756/ENSG00000106178/ENSG00000136244/ENSG00000146648 | SOCS3/TNFAIP3/NFKBIZ/PTGS2/CCL24/IL6/EGFR | GO_BP |
| GO:0051222~positive regulation of protein transport | 7 | 7/43 | 414/18012 | 5.08E-05 | 0.001374 | 7.082575 | ENSG00000171560/ENSG00000073756/ENSG00000136244/ENSG00000240972/ENSG00000174775/ENSG00000146648/ENSG00000157873 | FGA/PTGS2/IL6/MIF/HRAS/EGFR/TNFRSF14 | GO_BP |
| GO:0003018~vascular process in circulatory system | 5 | 5/43 | 170/18012 | 5.08E-05 | 0.001374 | 12.32011 | ENSG00000171560/ENSG00000073756/ENSG00000145147/ENSG00000180871/ENSG00000146648 | FGA/PTGS2/SLIT2/CXCR2/EGFR | GO_BP |
| GO:0050673~epithelial cell proliferation | 7 | 7/43 | 417/18012 | 5.32E-05 | 0.001409 | 7.031621 | ENSG00000118503/ENSG00000106178/ENSG00000174775/ENSG00000109321/ENSG00000146648/ENSG00000119508/ENSG00000118257 | TNFAIP3/CCL24/HRAS/AREG/EGFR/NR4A3/NRP2 | GO_BP |
| GO:0070098~chemokine-mediated signaling pathway | 4 | 4/43 | 87/18012 | 5.43E-05 | 0.001409 | 19.25902 | ENSG00000163464/ENSG00000106178/ENSG00000145147/ENSG00000180871 | CXCR1/CCL24/SLIT2/CXCR2 | GO_BP |
| GO:0045907~positive regulation of vasoconstriction | 3 | 3/43 | 31/18012 | 5.44E-05 | 0.001409 | 40.53713 | ENSG00000171560/ENSG00000073756/ENSG00000146648 | FGA/PTGS2/EGFR | GO_BP |
| GO:0050829~defense response to Gram-negative bacterium | 4 | 4/43 | 88/18012 | 5.68E-05 | 0.001451 | 19.04017 | ENSG00000187908/ENSG00000136244/ENSG00000164825/ENSG00000157873 | DMBT1/IL6/DEFB1/TNFRSF14 | GO_BP |
| GO:1904894~positive regulation of STAT cascade | 4 | 4/43 | 89/18012 | 5.93E-05 | 0.001497 | 18.82623 | ENSG00000184557/ENSG00000168685/ENSG00000136244/ENSG00000128342 | SOCS3/IL7R/IL6/LIF | GO_BP |
| GO:0051047~positive regulation of secretion | 7 | 7/43 | 427/18012 | 6.17E-05 | 0.001532 | 6.866946 | ENSG00000171560/ENSG00000136244/ENSG00000240972/ENSG00000122641/ENSG00000104918/ENSG00000146648/ENSG00000157873 | FGA/IL6/MIF/INHBA/RETN/EGFR/TNFRSF14 | GO_BP |
| GO:0070372~regulation of ERK1 and ERK2 cascade | 6 | 6/43 | 291/18012 | 6.23E-05 | 0.001532 | 8.636778 | ENSG00000171560/ENSG00000106178/ENSG00000240972/ENSG00000174775/ENSG00000128342/ENSG00000146648 | FGA/CCL24/MIF/HRAS/LIF/EGFR | GO_BP |
| GO:0033028~myeloid cell apoptotic process | 3 | 3/43 | 33/18012 | 6.58E-05 | 0.001597 | 38.08034 | ENSG00000136244/ENSG00000240972/ENSG00000180871 | IL6/MIF/CXCR2 | GO_BP |
| GO:0050900~leukocyte migration | 7 | 7/43 | 433/18012 | 6.74E-05 | 0.001616 | 6.771792 | ENSG00000163464/ENSG00000106178/ENSG00000136244/ENSG00000240972/ENSG00000145147/ENSG00000180871/ENSG00000157873 | CXCR1/CCL24/IL6/MIF/SLIT2/CXCR2/TNFRSF14 | GO_BP |
| GO:0060326~cell chemotaxis | 6 | 6/43 | 298/18012 | 7.10E-05 | 0.001682 | 8.4339 | ENSG00000163464/ENSG00000106178/ENSG00000136244/ENSG00000240972/ENSG00000145147/ENSG00000180871 | CXCR1/CCL24/IL6/MIF/SLIT2/CXCR2 | GO_BP |
| GO:1903708~positive regulation of hemopoiesis | 5 | 5/43 | 184/18012 | 7.40E-05 | 0.001732 | 11.38271 | ENSG00000187608/ENSG00000144802/ENSG00000168685/ENSG00000122641/ENSG00000128342 | ISG15/NFKBIZ/IL7R/INHBA/LIF | GO_BP |
| GO:0002702~positive regulation of production of molecular mediator of immune response | 4 | 4/43 | 95/18012 | 7.65E-05 | 0.001769 | 17.63721 | ENSG00000136244/ENSG00000240972/ENSG00000119508/ENSG00000157873 | IL6/MIF/NR4A3/TNFRSF14 | GO_BP |
| GO:0001893~maternal placenta development | 3 | 3/43 | 35/18012 | 7.86E-05 | 0.001778 | 35.90432 | ENSG00000073756/ENSG00000128342/ENSG00000187266 | PTGS2/LIF/EPOR | GO_BP |
| GO:1990868~response to chemokine | 4 | 4/43 | 96/18012 | 7.97E-05 | 0.001778 | 17.45349 | ENSG00000163464/ENSG00000106178/ENSG00000145147/ENSG00000180871 | CXCR1/CCL24/SLIT2/CXCR2 | GO_BP |
| GO:1990869~cellular response to chemokine | 4 | 4/43 | 96/18012 | 7.97E-05 | 0.001778 | 17.45349 | ENSG00000163464/ENSG00000106178/ENSG00000145147/ENSG00000180871 | CXCR1/CCL24/SLIT2/CXCR2 | GO_BP |
| GO:0070371~ERK1 and ERK2 cascade | 6 | 6/43 | 308/18012 | 8.52E-05 | 0.001879 | 8.160072 | ENSG00000171560/ENSG00000106178/ENSG00000240972/ENSG00000174775/ENSG00000128342/ENSG00000146648 | FGA/CCL24/MIF/HRAS/LIF/EGFR | GO_BP |
| GO:1904951~positive regulation of establishment of protein localization | 7 | 7/43 | 452/18012 | 8.82E-05 | 0.001923 | 6.487137 | ENSG00000171560/ENSG00000073756/ENSG00000136244/ENSG00000240972/ENSG00000174775/ENSG00000146648/ENSG00000157873 | FGA/PTGS2/IL6/MIF/HRAS/EGFR/TNFRSF14 | GO_BP |
| GO:0050863~regulation of T cell activation | 6 | 6/43 | 312/18012 | 9.15E-05 | 0.001972 | 8.055456 | ENSG00000144802/ENSG00000168685/ENSG00000136244/ENSG00000101096/ENSG00000157873/ENSG00000213658 | NFKBIZ/IL7R/IL6/NFATC2/TNFRSF14/LAT | GO_BP |
| GO:0001819~positive regulation of cytokine production | 7 | 7/43 | 457/18012 | 9.45E-05 | 0.002014 | 6.416162 | ENSG00000055332/ENSG00000073756/ENSG00000136244/ENSG00000240972/ENSG00000174775/ENSG00000119508/ENSG00000157873 | EIF2AK2/PTGS2/IL6/MIF/HRAS/NR4A3/TNFRSF14 | GO_BP |
| GO:0030593~neutrophil chemotaxis | 4 | 4/43 | 101/18012 | 9.72E-05 | 0.002026 | 16.58945 | ENSG00000163464/ENSG00000106178/ENSG00000145147/ENSG00000180871 | CXCR1/CCL24/SLIT2/CXCR2 | GO_BP |
| GO:0050830~defense response to Gram-positive bacterium | 4 | 4/43 | 101/18012 | 9.72E-05 | 0.002026 | 16.58945 | ENSG00000187908/ENSG00000136244/ENSG00000164825/ENSG00000157873 | DMBT1/IL6/DEFB1/TNFRSF14 | GO_BP |
| GO:0009615~response to virus | 6 | 6/43 | 325/18012 | 0.000114 | 0.00236 | 7.733238 | ENSG00000187608/ENSG00000118503/ENSG00000055332/ENSG00000130303/ENSG00000187908/ENSG00000136244 | ISG15/TNFAIP3/EIF2AK2/BST2/DMBT1/IL6 | GO_BP |
| GO:0045124~regulation of bone resorption | 3 | 3/43 | 40/18012 | 0.000118 | 0.002402 | 31.41628 | ENSG00000118503/ENSG00000136244/ENSG00000146648 | TNFAIP3/IL6/EGFR | GO_BP |
| GO:1903531~negative regulation of secretion by cell | 5 | 5/43 | 206/18012 | 0.000126 | 0.002544 | 10.16708 | ENSG00000118503/ENSG00000122641/ENSG00000128342/ENSG00000139574/ENSG00000267281 | TNFAIP3/INHBA/LIF/NPFF/AC023509.3 | GO_BP |
| GO:0043312~neutrophil degranulation | 7 | 7/43 | 483/18012 | 0.000133 | 0.002663 | 6.070779 | ENSG00000130303/ENSG00000163464/ENSG00000240972/ENSG00000180871/ENSG00000104918/ENSG00000197081/ENSG00000162747 | BST2/CXCR1/MIF/CXCR2/RETN/IGF2R/FCGR3B | GO_BP |
| GO:0070374~positive regulation of ERK1 and ERK2 cascade | 5 | 5/43 | 209/18012 | 0.000135 | 0.002666 | 10.02114 | ENSG00000171560/ENSG00000106178/ENSG00000240972/ENSG00000174775/ENSG00000146648 | FGA/CCL24/MIF/HRAS/EGFR | GO_BP |
| GO:0019731~antibacterial humoral response | 3 | 3/43 | 42/18012 | 0.000136 | 0.002668 | 29.92027 | ENSG00000171560/ENSG00000187908/ENSG00000164825 | FGA/DMBT1/DEFB1 | GO_BP |
| GO:0002283~neutrophil activation involved in immune response | 7 | 7/43 | 486/18012 | 0.000138 | 0.002683 | 6.033305 | ENSG00000130303/ENSG00000163464/ENSG00000240972/ENSG00000180871/ENSG00000104918/ENSG00000197081/ENSG00000162747 | BST2/CXCR1/MIF/CXCR2/RETN/IGF2R/FCGR3B | GO_BP |
| GO:0002688~regulation of leukocyte chemotaxis | 4 | 4/43 | 112/18012 | 0.000145 | 0.002779 | 14.96013 | ENSG00000136244/ENSG00000240972/ENSG00000145147/ENSG00000180871 | IL6/MIF/SLIT2/CXCR2 | GO_BP |
| GO:0021795~cerebral cortex cell migration | 3 | 3/43 | 43/18012 | 0.000146 | 0.002779 | 29.22445 | ENSG00000145147/ENSG00000146648/ENSG00000118257 | SLIT2/EGFR/NRP2 | GO_BP |
| GO:0002699~positive regulation of immune effector process | 5 | 5/43 | 214/18012 | 0.000151 | 0.002804 | 9.787003 | ENSG00000144802/ENSG00000136244/ENSG00000240972/ENSG00000119508/ENSG00000157873 | NFKBIZ/IL6/MIF/NR4A3/TNFRSF14 | GO_BP |
| GO:1903039~positive regulation of leukocyte cell-cell adhesion | 5 | 5/43 | 214/18012 | 0.000151 | 0.002804 | 9.787003 | ENSG00000144802/ENSG00000168685/ENSG00000136244/ENSG00000119508/ENSG00000157873 | NFKBIZ/IL7R/IL6/NR4A3/TNFRSF14 | GO_BP |
| GO:0042119~neutrophil activation | 7 | 7/43 | 496/18012 | 0.000157 | 0.002896 | 5.911665 | ENSG00000130303/ENSG00000163464/ENSG00000240972/ENSG00000180871/ENSG00000104918/ENSG00000197081/ENSG00000162747 | BST2/CXCR1/MIF/CXCR2/RETN/IGF2R/FCGR3B | GO_BP |
| GO:1990266~neutrophil migration | 4 | 4/43 | 115/18012 | 0.000161 | 0.002933 | 14.56987 | ENSG00000163464/ENSG00000106178/ENSG00000145147/ENSG00000180871 | CXCR1/CCL24/SLIT2/CXCR2 | GO_BP |
| GO:0022602~ovulation cycle process | 3 | 3/43 | 46/18012 | 0.000179 | 0.003241 | 27.3185 | ENSG00000145147/ENSG00000122641/ENSG00000104918 | SLIT2/INHBA/RETN | GO_BP |
| GO:0000302~response to reactive oxygen species | 5 | 5/43 | 223/18012 | 0.000182 | 0.003253 | 9.392012 | ENSG00000118503/ENSG00000136244/ENSG00000109321/ENSG00000146648/ENSG00000119508 | TNFAIP3/IL6/AREG/EGFR/NR4A3 | GO_BP |
| GO:0019730~antimicrobial humoral response | 4 | 4/43 | 119/18012 | 0.000183 | 0.003253 | 14.08013 | ENSG00000115523/ENSG00000171560/ENSG00000187908/ENSG00000164825 | GNLY/FGA/DMBT1/DEFB1 | GO_BP |
| GO:0071621~granulocyte chemotaxis | 4 | 4/43 | 120/18012 | 0.000189 | 0.0033 | 13.96279 | ENSG00000163464/ENSG00000106178/ENSG00000145147/ENSG00000180871 | CXCR1/CCL24/SLIT2/CXCR2 | GO_BP |
| GO:0002437~inflammatory response to antigenic stimulus | 3 | 3/43 | 47/18012 | 0.000191 | 0.0033 | 26.73726 | ENSG00000180871/ENSG00000139574/ENSG00000267281 | CXCR2/NPFF/AC023509.3 | GO_BP |
| GO:2000107~negative regulation of leukocyte apoptotic process | 3 | 3/43 | 47/18012 | 0.000191 | 0.0033 | 26.73726 | ENSG00000168685/ENSG00000240972/ENSG00000180871 | IL7R/MIF/CXCR2 | GO_BP |
| GO:0035690~cellular response to drug | 6 | 6/43 | 360/18012 | 0.0002 | 0.003418 | 6.981395 | ENSG00000118503/ENSG00000073756/ENSG00000136244/ENSG00000145147/ENSG00000146648/ENSG00000119508 | TNFAIP3/PTGS2/IL6/SLIT2/EGFR/NR4A3 | GO_BP |
| GO:0046850~regulation of bone remodeling | 3 | 3/43 | 48/18012 | 0.000203 | 0.003452 | 26.18023 | ENSG00000118503/ENSG00000136244/ENSG00000146648 | TNFAIP3/IL6/EGFR | GO_BP |
| GO:0048146~positive regulation of fibroblast proliferation | 3 | 3/43 | 49/18012 | 0.000216 | 0.003639 | 25.64594 | ENSG00000240972/ENSG00000197956/ENSG00000146648 | MIF/S100A6/EGFR | GO_BP |
| GO:0051048~negative regulation of secretion | 5 | 5/43 | 233/18012 | 0.000224 | 0.003731 | 8.988921 | ENSG00000118503/ENSG00000122641/ENSG00000128342/ENSG00000139574/ENSG00000267281 | TNFAIP3/INHBA/LIF/NPFF/AC023509.3 | GO_BP |
| GO:0002687~positive regulation of leukocyte migration | 4 | 4/43 | 128/18012 | 0.000242 | 0.004006 | 13.09012 | ENSG00000106178/ENSG00000136244/ENSG00000180871/ENSG00000157873 | CCL24/IL6/CXCR2/TNFRSF14 | GO_BP |
| GO:0046887~positive regulation of hormone secretion | 4 | 4/43 | 131/18012 | 0.000265 | 0.00434 | 12.79034 | ENSG00000171560/ENSG00000122641/ENSG00000104918/ENSG00000146648 | FGA/INHBA/RETN/EGFR | GO_BP |
| GO:0021879~forebrain neuron differentiation | 3 | 3/43 | 53/18012 | 0.000273 | 0.00444 | 23.7104 | ENSG00000145147/ENSG00000122641/ENSG00000118257 | SLIT2/INHBA/NRP2 | GO_BP |
| GO:0048545~response to steroid hormone | 6 | 6/43 | 385/18012 | 0.000287 | 0.004618 | 6.528058 | ENSG00000073756/ENSG00000136244/ENSG00000145147/ENSG00000109321/ENSG00000146648/ENSG00000119508 | PTGS2/IL6/SLIT2/AREG/EGFR/NR4A3 | GO_BP |
| GO:1901342~regulation of vasculature development | 6 | 6/43 | 387/18012 | 0.000295 | 0.004708 | 6.494321 | ENSG00000118503/ENSG00000073756/ENSG00000106178/ENSG00000136244/ENSG00000101096/ENSG00000180871 | TNFAIP3/PTGS2/CCL24/IL6/NFATC2/CXCR2 | GO_BP |
| GO:0021537~telencephalon development | 5 | 5/43 | 248/18012 | 0.000298 | 0.004731 | 8.445236 | ENSG00000145147/ENSG00000122641/ENSG00000146648/ENSG00000119508/ENSG00000118257 | SLIT2/INHBA/EGFR/NR4A3/NRP2 | GO_BP |
| GO:0030072~peptide hormone secretion | 5 | 5/43 | 252/18012 | 0.000321 | 0.004876 | 8.311185 | ENSG00000171560/ENSG00000136244/ENSG00000139574/ENSG00000267281/ENSG00000146648 | FGA/IL6/NPFF/AC023509.3/EGFR | GO_BP |
| GO:0022029~telencephalon cell migration | 3 | 3/43 | 56/18012 | 0.000322 | 0.004876 | 22.4402 | ENSG00000145147/ENSG00000146648/ENSG00000118257 | SLIT2/EGFR/NRP2 | GO_BP |
| GO:0032722~positive regulation of chemokine production | 3 | 3/43 | 56/18012 | 0.000322 | 0.004876 | 22.4402 | ENSG00000055332/ENSG00000136244/ENSG00000240972 | EIF2AK2/IL6/MIF | GO_BP |
| GO:0042542~response to hydrogen peroxide | 4 | 4/43 | 138/18012 | 0.000323 | 0.004876 | 12.14156 | ENSG00000118503/ENSG00000136244/ENSG00000109321/ENSG00000119508 | TNFAIP3/IL6/AREG/NR4A3 | GO_BP |
| GO:0070665~positive regulation of leukocyte proliferation | 4 | 4/43 | 138/18012 | 0.000323 | 0.004876 | 12.14156 | ENSG00000130303/ENSG00000136244/ENSG00000240972/ENSG00000101096 | BST2/IL6/MIF/NFATC2 | GO_BP |
| GO:0097530~granulocyte migration | 4 | 4/43 | 138/18012 | 0.000323 | 0.004876 | 12.14156 | ENSG00000163464/ENSG00000106178/ENSG00000145147/ENSG00000180871 | CXCR1/CCL24/SLIT2/CXCR2 | GO_BP |
| GO:0006959~humoral immune response | 5 | 5/43 | 254/18012 | 0.000333 | 0.004964 | 8.245743 | ENSG00000115523/ENSG00000171560/ENSG00000187908/ENSG00000136244/ENSG00000164825 | GNLY/FGA/DMBT1/IL6/DEFB1 | GO_BP |
| GO:0019229~regulation of vasoconstriction | 3 | 3/43 | 57/18012 | 0.000339 | 0.004964 | 22.04651 | ENSG00000171560/ENSG00000073756/ENSG00000146648 | FGA/PTGS2/EGFR | GO_BP |
| GO:0061900~glial cell activation | 3 | 3/43 | 57/18012 | 0.000339 | 0.004964 | 22.04651 | ENSG00000136244/ENSG00000105835/ENSG00000146648 | IL6/NAMPT/EGFR | GO_BP |
| GO:1904892~regulation of STAT cascade | 4 | 4/43 | 140/18012 | 0.000341 | 0.004964 | 11.96811 | ENSG00000184557/ENSG00000168685/ENSG00000136244/ENSG00000128342 | SOCS3/IL7R/IL6/LIF | GO_BP |
| GO:0022407~regulation of cell-cell adhesion | 6 | 6/43 | 398/18012 | 0.000342 | 0.004964 | 6.31483 | ENSG00000171560/ENSG00000144802/ENSG00000168685/ENSG00000136244/ENSG00000119508/ENSG00000157873 | FGA/NFKBIZ/IL7R/IL6/NR4A3/TNFRSF14 | GO_BP |
| GO:0002460~adaptive immune response based on somatic recombination of immune receptors built from immunoglobulin superfamily domains | 5 | 5/43 | 256/18012 | 0.000345 | 0.004964 | 8.181323 | ENSG00000118503/ENSG00000144802/ENSG00000168685/ENSG00000136244/ENSG00000174775 | TNFAIP3/NFKBIZ/IL7R/IL6/HRAS | GO_BP |
| GO:0045785~positive regulation of cell adhesion | 6 | 6/43 | 399/18012 | 0.000347 | 0.004964 | 6.299003 | ENSG00000171560/ENSG00000144802/ENSG00000168685/ENSG00000136244/ENSG00000119508/ENSG00000157873 | FGA/NFKBIZ/IL7R/IL6/NR4A3/TNFRSF14 | GO_BP |
| GO:0060707~trophoblast giant cell differentiation | 2 | 2/43 | 12/18012 | 0.000362 | 0.005141 | 69.81395 | ENSG00000184557/ENSG00000128342 | SOCS3/LIF | GO_BP |
| GO:0002822~regulation of adaptive immune response based on somatic recombination of immune receptors built from immunoglobulin superfamily domains | 4 | 4/43 | 143/18012 | 0.00037 | 0.005213 | 11.71703 | ENSG00000118503/ENSG00000144802/ENSG00000168685/ENSG00000136244 | TNFAIP3/NFKBIZ/IL7R/IL6 | GO_BP |
| GO:0021885~forebrain cell migration | 3 | 3/43 | 59/18012 | 0.000375 | 0.005217 | 21.29917 | ENSG00000145147/ENSG00000146648/ENSG00000118257 | SLIT2/EGFR/NRP2 | GO_BP |
| GO:0045071~negative regulation of viral genome replication | 3 | 3/43 | 59/18012 | 0.000375 | 0.005217 | 21.29917 | ENSG00000187608/ENSG00000055332/ENSG00000130303 | ISG15/EIF2AK2/BST2 | GO_BP |
| GO:0002262~myeloid cell homeostasis | 4 | 4/43 | 147/18012 | 0.00041 | 0.005639 | 11.3982 | ENSG00000187608/ENSG00000136244/ENSG00000180871/ENSG00000122641 | ISG15/IL6/CXCR2/INHBA | GO_BP |
| GO:0050714~positive regulation of protein secretion | 5 | 5/43 | 266/18012 | 0.000412 | 0.005639 | 7.873754 | ENSG00000171560/ENSG00000136244/ENSG00000240972/ENSG00000146648/ENSG00000157873 | FGA/IL6/MIF/EGFR/TNFRSF14 | GO_BP |
| GO:0045779~negative regulation of bone resorption | 2 | 2/43 | 13/18012 | 0.000427 | 0.005708 | 64.44365 | ENSG00000118503/ENSG00000136244 | TNFAIP3/IL6 | GO_BP |
| GO:0060712~spongiotrophoblast layer development | 2 | 2/43 | 13/18012 | 0.000427 | 0.005708 | 64.44365 | ENSG00000184557/ENSG00000128342 | SOCS3/LIF | GO_BP |
| GO:0061029~eyelid development in camera-type eye | 2 | 2/43 | 13/18012 | 0.000427 | 0.005708 | 64.44365 | ENSG00000122641/ENSG00000146648 | INHBA/EGFR | GO_BP |
| GO:0050777~negative regulation of immune response | 4 | 4/43 | 149/18012 | 0.000432 | 0.005708 | 11.2452 | ENSG00000118503/ENSG00000130303/ENSG00000168685/ENSG00000157873 | TNFAIP3/BST2/IL7R/TNFRSF14 | GO_BP |
| GO:0002260~lymphocyte homeostasis | 3 | 3/43 | 62/18012 | 0.000434 | 0.005708 | 20.26857 | ENSG00000118503/ENSG00000240972/ENSG00000213658 | TNFAIP3/MIF/LAT | GO_BP |
| GO:0045453~bone resorption | 3 | 3/43 | 62/18012 | 0.000434 | 0.005708 | 20.26857 | ENSG00000118503/ENSG00000136244/ENSG00000146648 | TNFAIP3/IL6/EGFR | GO_BP |
| GO:1902105~regulation of leukocyte differentiation | 5 | 5/43 | 270/18012 | 0.000441 | 0.005749 | 7.757106 | ENSG00000144802/ENSG00000168685/ENSG00000101096/ENSG00000122641/ENSG00000128342 | NFKBIZ/IL7R/NFATC2/INHBA/LIF | GO_BP |
| GO:0046651~lymphocyte proliferation | 5 | 5/43 | 271/18012 | 0.000448 | 0.005808 | 7.728482 | ENSG00000168685/ENSG00000136244/ENSG00000240972/ENSG00000101096/ENSG00000157873 | IL7R/IL6/MIF/NFATC2/TNFRSF14 | GO_BP |
| GO:0032943~mononuclear cell proliferation | 5 | 5/43 | 273/18012 | 0.000463 | 0.005965 | 7.671863 | ENSG00000168685/ENSG00000136244/ENSG00000240972/ENSG00000101096/ENSG00000157873 | IL7R/IL6/MIF/NFATC2/TNFRSF14 | GO_BP |
| GO:0002548~monocyte chemotaxis | 3 | 3/43 | 64/18012 | 0.000477 | 0.0061 | 19.63517 | ENSG00000106178/ENSG00000136244/ENSG00000145147 | CCL24/IL6/SLIT2 | GO_BP |
| GO:0010459~negative regulation of heart rate | 2 | 2/43 | 14/18012 | 0.000497 | 0.006196 | 59.84053 | ENSG00000139574/ENSG00000267281 | NPFF/AC023509.3 | GO_BP |
| GO:0032096~negative regulation of response to food | 2 | 2/43 | 14/18012 | 0.000497 | 0.006196 | 59.84053 | ENSG00000139574/ENSG00000267281 | NPFF/AC023509.3 | GO_BP |
| GO:0032099~negative regulation of appetite | 2 | 2/43 | 14/18012 | 0.000497 | 0.006196 | 59.84053 | ENSG00000139574/ENSG00000267281 | NPFF/AC023509.3 | GO_BP |
| GO:0034356~NAD biosynthesis via nicotinamide riboside salvage pathway | 2 | 2/43 | 14/18012 | 0.000497 | 0.006196 | 59.84053 | ENSG00000073756/ENSG00000105835 | PTGS2/NAMPT | GO_BP |
| GO:0021872~forebrain generation of neurons | 3 | 3/43 | 66/18012 | 0.000522 | 0.006462 | 19.04017 | ENSG00000145147/ENSG00000122641/ENSG00000118257 | SLIT2/INHBA/NRP2 | GO_BP |
| GO:0034614~cellular response to reactive oxygen species | 4 | 4/43 | 159/18012 | 0.000552 | 0.006785 | 10.53796 | ENSG00000118503/ENSG00000136244/ENSG00000146648/ENSG00000119508 | TNFAIP3/IL6/EGFR/NR4A3 | GO_BP |
| GO:0019932~second-messenger-mediated signaling | 6 | 6/43 | 437/18012 | 0.000562 | 0.006828 | 5.751264 | ENSG00000163464/ENSG00000101096/ENSG00000164825/ENSG00000180871/ENSG00000146648/ENSG00000213658 | CXCR1/NFATC2/DEFB1/CXCR2/EGFR/LAT | GO_BP |
| GO:0006979~response to oxidative stress | 6 | 6/43 | 438/18012 | 0.000568 | 0.006828 | 5.738133 | ENSG00000118503/ENSG00000073756/ENSG00000136244/ENSG00000109321/ENSG00000146648/ENSG00000119508 | TNFAIP3/PTGS2/IL6/AREG/EGFR/NR4A3 | GO_BP |
| GO:0042531~positive regulation of tyrosine phosphorylation of STAT protein | 3 | 3/43 | 68/18012 | 0.00057 | 0.006828 | 18.48016 | ENSG00000184557/ENSG00000136244/ENSG00000128342 | SOCS3/IL6/LIF | GO_BP |
| GO:0002793~positive regulation of peptide secretion | 5 | 5/43 | 286/18012 | 0.000573 | 0.006828 | 7.323142 | ENSG00000171560/ENSG00000136244/ENSG00000240972/ENSG00000146648/ENSG00000157873 | FGA/IL6/MIF/EGFR/TNFRSF14 | GO_BP |
| GO:0046851~negative regulation of bone remodeling | 2 | 2/43 | 15/18012 | 0.000573 | 0.006828 | 55.85116 | ENSG00000118503/ENSG00000136244 | TNFAIP3/IL6 | GO_BP |
| GO:0097696~STAT cascade | 4 | 4/43 | 161/18012 | 0.000578 | 0.006849 | 10.40705 | ENSG00000184557/ENSG00000168685/ENSG00000136244/ENSG00000128342 | SOCS3/IL7R/IL6/LIF | GO_BP |
| GO:0001818~negative regulation of cytokine production | 5 | 5/43 | 289/18012 | 0.0006 | 0.007063 | 7.247123 | ENSG00000187608/ENSG00000118503/ENSG00000130303/ENSG00000136244/ENSG00000122641 | ISG15/TNFAIP3/BST2/IL6/INHBA | GO_BP |
| GO:1903522~regulation of blood circulation | 5 | 5/43 | 290/18012 | 0.00061 | 0.007131 | 7.222133 | ENSG00000171560/ENSG00000073756/ENSG00000139574/ENSG00000267281/ENSG00000146648 | FGA/PTGS2/NPFF/AC023509.3/EGFR | GO_BP |
| GO:1903524~positive regulation of blood circulation | 3 | 3/43 | 71/18012 | 0.000647 | 0.007379 | 17.69931 | ENSG00000171560/ENSG00000073756/ENSG00000146648 | FGA/PTGS2/EGFR | GO_BP |
| GO:0048511~rhythmic process | 5 | 5/43 | 294/18012 | 0.000649 | 0.007379 | 7.123873 | ENSG00000145147/ENSG00000122641/ENSG00000105835/ENSG00000104918/ENSG00000146648 | SLIT2/INHBA/NAMPT/RETN/EGFR | GO_BP |
| GO:0001780~neutrophil homeostasis | 2 | 2/43 | 16/18012 | 0.000654 | 0.007379 | 52.36047 | ENSG00000136244/ENSG00000180871 | IL6/CXCR2 | GO_BP |
| GO:0032105~negative regulation of response to extracellular stimulus | 2 | 2/43 | 16/18012 | 0.000654 | 0.007379 | 52.36047 | ENSG00000139574/ENSG00000267281 | NPFF/AC023509.3 | GO_BP |
| GO:0032108~negative regulation of response to nutrient levels | 2 | 2/43 | 16/18012 | 0.000654 | 0.007379 | 52.36047 | ENSG00000139574/ENSG00000267281 | NPFF/AC023509.3 | GO_BP |
| GO:0033033~negative regulation of myeloid cell apoptotic process | 2 | 2/43 | 16/18012 | 0.000654 | 0.007379 | 52.36047 | ENSG00000240972/ENSG00000180871 | MIF/CXCR2 | GO_BP |
| GO:0045619~regulation of lymphocyte differentiation | 4 | 4/43 | 168/18012 | 0.000679 | 0.007612 | 9.973422 | ENSG00000144802/ENSG00000168685/ENSG00000101096/ENSG00000122641 | NFKBIZ/IL7R/NFATC2/INHBA | GO_BP |
| GO:0018105~peptidyl-serine phosphorylation | 5 | 5/43 | 298/18012 | 0.000689 | 0.007688 | 7.02825 | ENSG00000073756/ENSG00000136244/ENSG00000240972/ENSG00000128342/ENSG00000146648 | PTGS2/IL6/MIF/LIF/EGFR | GO_BP |
| GO:0021543~pallium development | 4 | 4/43 | 169/18012 | 0.000694 | 0.007689 | 9.914408 | ENSG00000145147/ENSG00000146648/ENSG00000119508/ENSG00000118257 | SLIT2/EGFR/NR4A3/NRP2 | GO_BP |
| GO:1903037~regulation of leukocyte cell-cell adhesion | 5 | 5/43 | 299/18012 | 0.0007 | 0.007689 | 7.004744 | ENSG00000144802/ENSG00000168685/ENSG00000136244/ENSG00000119508/ENSG00000157873 | NFKBIZ/IL7R/IL6/NR4A3/TNFRSF14 | GO_BP |
| GO:0031100~animal organ regeneration | 3 | 3/43 | 73/18012 | 0.000702 | 0.007689 | 17.2144 | ENSG00000146648/ENSG00000197081/ENSG00000119508 | EGFR/IGF2R/NR4A3 | GO_BP |
| GO:0043901~negative regulation of multi-organism process | 4 | 4/43 | 170/18012 | 0.000709 | 0.007731 | 9.856088 | ENSG00000187608/ENSG00000118503/ENSG00000055332/ENSG00000130303 | ISG15/TNFAIP3/EIF2AK2/BST2 | GO_BP |
| GO:0048771~tissue remodeling | 4 | 4/43 | 171/18012 | 0.000725 | 0.007858 | 9.79845 | ENSG00000118503/ENSG00000136244/ENSG00000128342/ENSG00000146648 | TNFAIP3/IL6/LIF/EGFR | GO_BP |
| GO:0050871~positive regulation of B cell activation | 3 | 3/43 | 74/18012 | 0.00073 | 0.007866 | 16.98177 | ENSG00000136244/ENSG00000240972/ENSG00000101096 | IL6/MIF/NFATC2 | GO_BP |
| GO:0002689~negative regulation of leukocyte chemotaxis | 2 | 2/43 | 17/18012 | 0.00074 | 0.00793 | 49.28044 | ENSG00000240972/ENSG00000145147 | MIF/SLIT2 | GO_BP |
| GO:0042110~T cell activation | 6 | 6/43 | 462/18012 | 0.000751 | 0.008008 | 5.440048 | ENSG00000144802/ENSG00000168685/ENSG00000136244/ENSG00000101096/ENSG00000157873/ENSG00000213658 | NFKBIZ/IL7R/IL6/NFATC2/TNFRSF14/LAT | GO_BP |
| GO:0042310~vasoconstriction | 3 | 3/43 | 75/18012 | 0.000759 | 0.008045 | 16.75535 | ENSG00000171560/ENSG00000073756/ENSG00000146648 | FGA/PTGS2/EGFR | GO_BP |
| GO:0001959~regulation of cytokine-mediated signaling pathway | 4 | 4/43 | 174/18012 | 0.000774 | 0.008155 | 9.629511 | ENSG00000184557/ENSG00000118503/ENSG00000136244/ENSG00000145147 | SOCS3/TNFAIP3/IL6/SLIT2 | GO_BP |
| GO:0007568~aging | 5 | 5/43 | 313/18012 | 0.00086 | 0.009012 | 6.691433 | ENSG00000073756/ENSG00000240972/ENSG00000174775/ENSG00000105835/ENSG00000104918 | PTGS2/MIF/HRAS/NAMPT/RETN | GO_BP |
| GO:0016049~cell growth | 6 | 6/43 | 476/18012 | 0.000878 | 0.00915 | 5.280047 | ENSG00000130303/ENSG00000145147/ENSG00000122641/ENSG00000161055/ENSG00000146648/ENSG00000118257 | BST2/SLIT2/INHBA/SCGB3A1/EGFR/NRP2 | GO_BP |
| GO:0042509~regulation of tyrosine phosphorylation of STAT protein | 3 | 3/43 | 79/18012 | 0.000883 | 0.009157 | 15.90698 | ENSG00000184557/ENSG00000136244/ENSG00000128342 | SOCS3/IL6/LIF | GO_BP |
| GO:0008217~regulation of blood pressure | 4 | 4/43 | 182/18012 | 0.000915 | 0.009297 | 9.206236 | ENSG00000073756/ENSG00000105835/ENSG00000139574/ENSG00000267281 | PTGS2/NAMPT/NPFF/AC023509.3 | GO_BP |
| GO:0032642~regulation of chemokine production | 3 | 3/43 | 80/18012 | 0.000916 | 0.009297 | 15.70814 | ENSG00000055332/ENSG00000136244/ENSG00000240972 | EIF2AK2/IL6/MIF | GO_BP |
| GO:0034103~regulation of tissue remodeling | 3 | 3/43 | 80/18012 | 0.000916 | 0.009297 | 15.70814 | ENSG00000118503/ENSG00000136244/ENSG00000146648 | TNFAIP3/IL6/EGFR | GO_BP |
| GO:0048708~astrocyte differentiation | 3 | 3/43 | 80/18012 | 0.000916 | 0.009297 | 15.70814 | ENSG00000136244/ENSG00000128342/ENSG00000146648 | IL6/LIF/EGFR | GO_BP |
| GO:0061081~positive regulation of myeloid leukocyte cytokine production involved in immune response | 2 | 2/43 | 19/18012 | 0.000928 | 0.009316 | 44.09302 | ENSG00000240972/ENSG00000119508 | MIF/NR4A3 | GO_BP |
| GO:1901741~positive regulation of myoblast fusion | 2 | 2/43 | 19/18012 | 0.000928 | 0.009316 | 44.09302 | ENSG00000101096/ENSG00000161055 | NFATC2/SCGB3A1 | GO_BP |
| GO:0048145~regulation of fibroblast proliferation | 3 | 3/43 | 81/18012 | 0.00095 | 0.009438 | 15.51421 | ENSG00000240972/ENSG00000197956/ENSG00000146648 | MIF/S100A6/EGFR | GO_BP |
| GO:0097756~negative regulation of blood vessel diameter | 3 | 3/43 | 81/18012 | 0.00095 | 0.009438 | 15.51421 | ENSG00000171560/ENSG00000073756/ENSG00000146648 | FGA/PTGS2/EGFR | GO_BP |
| GO:0018209~peptidyl-serine modification | 5 | 5/43 | 321/18012 | 0.000963 | 0.009517 | 6.524669 | ENSG00000073756/ENSG00000136244/ENSG00000240972/ENSG00000128342/ENSG00000146648 | PTGS2/IL6/MIF/LIF/EGFR | GO_BP |
| GO:0007260~tyrosine phosphorylation of STAT protein | 3 | 3/43 | 82/18012 | 0.000984 | 0.009631 | 15.32501 | ENSG00000184557/ENSG00000136244/ENSG00000128342 | SOCS3/IL6/LIF | GO_BP |
| GO:0048144~fibroblast proliferation | 3 | 3/43 | 82/18012 | 0.000984 | 0.009631 | 15.32501 | ENSG00000240972/ENSG00000197956/ENSG00000146648 | MIF/S100A6/EGFR | GO_BP |
| GO:0030308~negative regulation of cell growth | 4 | 4/43 | 186/18012 | 0.000992 | 0.009658 | 9.008252 | ENSG00000130303/ENSG00000145147/ENSG00000122641/ENSG00000161055 | BST2/SLIT2/INHBA/SCGB3A1 | GO_BP |
| GO:0060759~regulation of response to cytokine stimulus | 4 | 4/43 | 187/18012 | 0.001012 | 0.009802 | 8.96008 | ENSG00000184557/ENSG00000118503/ENSG00000136244/ENSG00000145147 | SOCS3/TNFAIP3/IL6/SLIT2 | GO_BP |
| GO:0032095~regulation of response to food | 2 | 2/43 | 20/18012 | 0.001029 | 0.00987 | 41.88837 | ENSG00000139574/ENSG00000267281 | NPFF/AC023509.3 | GO_BP |
| GO:0034104~negative regulation of tissue remodeling | 2 | 2/43 | 20/18012 | 0.001029 | 0.00987 | 41.88837 | ENSG00000118503/ENSG00000136244 | TNFAIP3/IL6 | GO_BP |
| GO:0019058~viral life cycle | 5 | 5/43 | 327/18012 | 0.001046 | 0.009977 | 6.40495 | ENSG00000187608/ENSG00000055332/ENSG00000130303/ENSG00000146648/ENSG00000157873 | ISG15/EIF2AK2/BST2/EGFR/TNFRSF14 | GO_BP |
| GO:1903901~negative regulation of viral life cycle | 3 | 3/43 | 85/18012 | 0.001092 | 0.010319 | 14.78413 | ENSG00000187608/ENSG00000055332/ENSG00000130303 | ISG15/EIF2AK2/BST2 | GO_BP |
| GO:1904035~regulation of epithelial cell apoptotic process | 3 | 3/43 | 85/18012 | 0.001092 | 0.010319 | 14.78413 | ENSG00000118503/ENSG00000171560/ENSG00000136244 | TNFAIP3/FGA/IL6 | GO_BP |
| GO:0007159~leukocyte cell-cell adhesion | 5 | 5/43 | 332/18012 | 0.001119 | 0.010325 | 6.30849 | ENSG00000144802/ENSG00000168685/ENSG00000136244/ENSG00000119508/ENSG00000157873 | NFKBIZ/IL7R/IL6/NR4A3/TNFRSF14 | GO_BP |
| GO:0031667~response to nutrient levels | 6 | 6/43 | 499/18012 | 0.00112 | 0.010325 | 5.036678 | ENSG00000055332/ENSG00000073756/ENSG00000105835/ENSG00000139574/ENSG00000267281/ENSG00000146648 | EIF2AK2/PTGS2/NAMPT/NPFF/AC023509.3/EGFR | GO_BP |
| GO:0008625~extrinsic apoptotic signaling pathway via death domain receptors | 3 | 3/43 | 86/18012 | 0.00113 | 0.010325 | 14.61222 | ENSG00000118503/ENSG00000171560/ENSG00000173535 | TNFAIP3/FGA/TNFRSF10C | GO_BP |
| GO:0046427~positive regulation of JAK-STAT cascade | 3 | 3/43 | 86/18012 | 0.00113 | 0.010325 | 14.61222 | ENSG00000184557/ENSG00000136244/ENSG00000128342 | SOCS3/IL6/LIF | GO_BP |
| GO:0090066~regulation of anatomical structure size | 6 | 6/43 | 500/18012 | 0.001132 | 0.010325 | 5.026605 | ENSG00000171560/ENSG00000168685/ENSG00000073756/ENSG00000106178/ENSG00000145147/ENSG00000146648 | FGA/IL7R/PTGS2/CCL24/SLIT2/EGFR | GO_BP |
| GO:0030728~ovulation | 2 | 2/43 | 21/18012 | 0.001136 | 0.010325 | 39.89369 | ENSG00000073756/ENSG00000122641 | PTGS2/INHBA | GO_BP |
| GO:0045649~regulation of macrophage differentiation | 2 | 2/43 | 21/18012 | 0.001136 | 0.010325 | 39.89369 | ENSG00000122641/ENSG00000128342 | INHBA/LIF | GO_BP |
| GO:1901739~regulation of myoblast fusion | 2 | 2/43 | 21/18012 | 0.001136 | 0.010325 | 39.89369 | ENSG00000101096/ENSG00000161055 | NFATC2/SCGB3A1 | GO_BP |
| GO:0001892~embryonic placenta development | 3 | 3/43 | 87/18012 | 0.001168 | 0.010519 | 14.44427 | ENSG00000184557/ENSG00000128342/ENSG00000146648 | SOCS3/LIF/EGFR | GO_BP |
| GO:0032602~chemokine production | 3 | 3/43 | 87/18012 | 0.001168 | 0.010519 | 14.44427 | ENSG00000055332/ENSG00000136244/ENSG00000240972 | EIF2AK2/IL6/MIF | GO_BP |
| GO:0071674~mononuclear cell migration | 3 | 3/43 | 89/18012 | 0.001248 | 0.011078 | 14.11968 | ENSG00000106178/ENSG00000136244/ENSG00000145147 | CCL24/IL6/SLIT2 | GO_BP |
| GO:0006925~inflammatory cell apoptotic process | 2 | 2/43 | 22/18012 | 0.001248 | 0.011078 | 38.08034 | ENSG00000136244/ENSG00000180871 | IL6/CXCR2 | GO_BP |
| GO:0035455~response to interferon-alpha | 2 | 2/43 | 22/18012 | 0.001248 | 0.011078 | 38.08034 | ENSG00000055332/ENSG00000130303 | EIF2AK2/BST2 | GO_BP |
| GO:0046849~bone remodeling | 3 | 3/43 | 90/18012 | 0.001288 | 0.011388 | 13.96279 | ENSG00000118503/ENSG00000136244/ENSG00000146648 | TNFAIP3/IL6/EGFR | GO_BP |
| GO:0050870~positive regulation of T cell activation | 4 | 4/43 | 200/18012 | 0.001297 | 0.011415 | 8.377674 | ENSG00000144802/ENSG00000168685/ENSG00000136244/ENSG00000157873 | NFKBIZ/IL7R/IL6/TNFRSF14 | GO_BP |
| GO:0045639~positive regulation of myeloid cell differentiation | 3 | 3/43 | 91/18012 | 0.00133 | 0.011596 | 13.80935 | ENSG00000187608/ENSG00000122641/ENSG00000128342 | ISG15/INHBA/LIF | GO_BP |
| GO:0070301~cellular response to hydrogen peroxide | 3 | 3/43 | 91/18012 | 0.00133 | 0.011596 | 13.80935 | ENSG00000118503/ENSG00000136244/ENSG00000119508 | TNFAIP3/IL6/NR4A3 | GO_BP |
| GO:0035929~steroid hormone secretion | 2 | 2/43 | 23/18012 | 0.001364 | 0.011787 | 36.42467 | ENSG00000122641/ENSG00000104918 | INHBA/RETN | GO_BP |
| GO:0072170~metanephric tubule development | 2 | 2/43 | 23/18012 | 0.001364 | 0.011787 | 36.42467 | ENSG00000180871/ENSG00000128342 | CXCR2/LIF | GO_BP |
| GO:0030098~lymphocyte differentiation | 5 | 5/43 | 352/18012 | 0.001449 | 0.012411 | 5.950053 | ENSG00000144802/ENSG00000168685/ENSG00000136244/ENSG00000101096/ENSG00000122641 | NFKBIZ/IL7R/IL6/NFATC2/INHBA | GO_BP |
| GO:0045765~regulation of angiogenesis | 5 | 5/43 | 352/18012 | 0.001449 | 0.012411 | 5.950053 | ENSG00000118503/ENSG00000073756/ENSG00000106178/ENSG00000136244/ENSG00000180871 | TNFAIP3/PTGS2/CCL24/IL6/CXCR2 | GO_BP |
| GO:0042116~macrophage activation | 3 | 3/43 | 94/18012 | 0.00146 | 0.012441 | 13.36863 | ENSG00000136244/ENSG00000240972/ENSG00000105835 | IL6/MIF/NAMPT | GO_BP |
| GO:0050670~regulation of lymphocyte proliferation | 4 | 4/43 | 207/18012 | 0.001472 | 0.012441 | 8.094371 | ENSG00000136244/ENSG00000240972/ENSG00000101096/ENSG00000157873 | IL6/MIF/NFATC2/TNFRSF14 | GO_BP |
| GO:0050792~regulation of viral process | 4 | 4/43 | 207/18012 | 0.001472 | 0.012441 | 8.094371 | ENSG00000187608/ENSG00000055332/ENSG00000130303/ENSG00000197081 | ISG15/EIF2AK2/BST2/IGF2R | GO_BP |
| GO:0002407~dendritic cell chemotaxis | 2 | 2/43 | 24/18012 | 0.001486 | 0.012446 | 34.90698 | ENSG00000163464/ENSG00000180871 | CXCR1/CXCR2 | GO_BP |
| GO:0032098~regulation of appetite | 2 | 2/43 | 24/18012 | 0.001486 | 0.012446 | 34.90698 | ENSG00000139574/ENSG00000267281 | NPFF/AC023509.3 | GO_BP |
| GO:0032944~regulation of mononuclear cell proliferation | 4 | 4/43 | 208/18012 | 0.001499 | 0.012446 | 8.055456 | ENSG00000136244/ENSG00000240972/ENSG00000101096/ENSG00000157873 | IL6/MIF/NFATC2/TNFRSF14 | GO_BP |
| GO:0042100~B cell proliferation | 3 | 3/43 | 95/18012 | 0.001505 | 0.012446 | 13.22791 | ENSG00000168685/ENSG00000240972/ENSG00000101096 | IL7R/MIF/NFATC2 | GO_BP |
| GO:0045069~regulation of viral genome replication | 3 | 3/43 | 95/18012 | 0.001505 | 0.012446 | 13.22791 | ENSG00000187608/ENSG00000055332/ENSG00000130303 | ISG15/EIF2AK2/BST2 | GO_BP |
| GO:0090276~regulation of peptide hormone secretion | 4 | 4/43 | 209/18012 | 0.001525 | 0.012556 | 8.016913 | ENSG00000171560/ENSG00000139574/ENSG00000267281/ENSG00000146648 | FGA/NPFF/AC023509.3/EGFR | GO_BP |
| GO:0002429~immune response-activating cell surface receptor signaling pathway | 5 | 5/43 | 357/18012 | 0.001542 | 0.012643 | 5.866719 | ENSG00000144802/ENSG00000101096/ENSG00000174775/ENSG00000119508/ENSG00000213658 | NFKBIZ/NFATC2/HRAS/NR4A3/LAT | GO_BP |
| GO:0008585~female gonad development | 3 | 3/43 | 96/18012 | 0.001551 | 0.012662 | 13.09012 | ENSG00000145147/ENSG00000122641/ENSG00000104918 | SLIT2/INHBA/RETN | GO_BP |
| GO:0050920~regulation of chemotaxis | 4 | 4/43 | 212/18012 | 0.001607 | 0.012998 | 7.903466 | ENSG00000136244/ENSG00000240972/ENSG00000145147/ENSG00000180871 | IL6/MIF/SLIT2/CXCR2 | GO_BP |
| GO:0031664~regulation of lipopolysaccharide-mediated signaling pathway | 2 | 2/43 | 25/18012 | 0.001613 | 0.012998 | 33.5107 | ENSG00000118503/ENSG00000240972 | TNFAIP3/MIF | GO_BP |
| GO:0072539~T-helper 17 cell differentiation | 2 | 2/43 | 25/18012 | 0.001613 | 0.012998 | 33.5107 | ENSG00000144802/ENSG00000136244 | NFKBIZ/IL6 | GO_BP |
| GO:0032649~regulation of interferon-gamma production | 3 | 3/43 | 98/18012 | 0.001646 | 0.01321 | 12.82297 | ENSG00000187608/ENSG00000174775/ENSG00000122641 | ISG15/HRAS/INHBA | GO_BP |
| GO:0048525~negative regulation of viral process | 3 | 3/43 | 99/18012 | 0.001695 | 0.013543 | 12.69345 | ENSG00000187608/ENSG00000055332/ENSG00000130303 | ISG15/EIF2AK2/BST2 | GO_BP |
| GO:0032104~regulation of response to extracellular stimulus | 2 | 2/43 | 26/18012 | 0.001745 | 0.013714 | 32.22182 | ENSG00000139574/ENSG00000267281 | NPFF/AC023509.3 | GO_BP |
| GO:0032107~regulation of response to nutrient levels | 2 | 2/43 | 26/18012 | 0.001745 | 0.013714 | 32.22182 | ENSG00000139574/ENSG00000267281 | NPFF/AC023509.3 | GO_BP |
| GO:0048143~astrocyte activation | 2 | 2/43 | 26/18012 | 0.001745 | 0.013714 | 32.22182 | ENSG00000136244/ENSG00000146648 | IL6/EGFR | GO_BP |
| GO:0060706~cell differentiation involved in embryonic placenta development | 2 | 2/43 | 26/18012 | 0.001745 | 0.013714 | 32.22182 | ENSG00000184557/ENSG00000128342 | SOCS3/LIF | GO_BP |
| GO:0046545~development of primary female sexual characteristics | 3 | 3/43 | 101/18012 | 0.001795 | 0.014049 | 12.44209 | ENSG00000145147/ENSG00000122641/ENSG00000104918 | SLIT2/INHBA/RETN | GO_BP |
| GO:0045444~fat cell differentiation | 4 | 4/43 | 220/18012 | 0.00184 | 0.014348 | 7.616068 | ENSG00000073756/ENSG00000136244/ENSG00000104918/ENSG00000119508 | PTGS2/IL6/RETN/NR4A3 | GO_BP |
| GO:0043903~regulation of symbiosis, encompassing mutualism through parasitism | 4 | 4/43 | 221/18012 | 0.001871 | 0.014376 | 7.581606 | ENSG00000187608/ENSG00000055332/ENSG00000130303/ENSG00000197081 | ISG15/EIF2AK2/BST2/IGF2R | GO_BP |
| GO:0036336~dendritic cell migration | 2 | 2/43 | 27/18012 | 0.001881 | 0.014376 | 31.02842 | ENSG00000163464/ENSG00000180871 | CXCR1/CXCR2 | GO_BP |
| GO:0060143~positive regulation of syncytium formation by plasma membrane fusion | 2 | 2/43 | 27/18012 | 0.001881 | 0.014376 | 31.02842 | ENSG00000101096/ENSG00000161055 | NFATC2/SCGB3A1 | GO_BP |
| GO:0072207~metanephric epithelium development | 2 | 2/43 | 27/18012 | 0.001881 | 0.014376 | 31.02842 | ENSG00000180871/ENSG00000128342 | CXCR2/LIF | GO_BP |
| GO:0090344~negative regulation of cell aging | 2 | 2/43 | 27/18012 | 0.001881 | 0.014376 | 31.02842 | ENSG00000240972/ENSG00000105835 | MIF/NAMPT | GO_BP |
| GO:0097191~extrinsic apoptotic signaling pathway | 4 | 4/43 | 223/18012 | 0.001933 | 0.014715 | 7.513609 | ENSG00000118503/ENSG00000171560/ENSG00000122641/ENSG00000173535 | TNFAIP3/FGA/INHBA/TNFRSF10C | GO_BP |
| GO:0030900~forebrain development | 5 | 5/43 | 379/18012 | 0.002004 | 0.014981 | 5.52617 | ENSG00000145147/ENSG00000122641/ENSG00000146648/ENSG00000119508/ENSG00000118257 | SLIT2/INHBA/EGFR/NR4A3/NRP2 | GO_BP |
| GO:0019233~sensory perception of pain | 3 | 3/43 | 105/18012 | 0.002005 | 0.014981 | 11.96811 | ENSG00000073756/ENSG00000139574/ENSG00000267281 | PTGS2/NPFF/AC023509.3 | GO_BP |
| GO:0001516~prostaglandin biosynthetic process | 2 | 2/43 | 28/18012 | 0.002023 | 0.014981 | 29.92027 | ENSG00000073756/ENSG00000240972 | PTGS2/MIF | GO_BP |
| GO:0046457~prostanoid biosynthetic process | 2 | 2/43 | 28/18012 | 0.002023 | 0.014981 | 29.92027 | ENSG00000073756/ENSG00000240972 | PTGS2/MIF | GO_BP |
| GO:0060259~regulation of feeding behavior | 2 | 2/43 | 28/18012 | 0.002023 | 0.014981 | 29.92027 | ENSG00000104918/ENSG00000119508 | RETN/NR4A3 | GO_BP |
| GO:0070102~interleukin-6-mediated signaling pathway | 2 | 2/43 | 28/18012 | 0.002023 | 0.014981 | 29.92027 | ENSG00000184557/ENSG00000136244 | SOCS3/IL6 | GO_BP |
| GO:0072538~T-helper 17 type immune response | 2 | 2/43 | 28/18012 | 0.002023 | 0.014981 | 29.92027 | ENSG00000144802/ENSG00000136244 | NFKBIZ/IL6 | GO_BP |
| GO:2001234~negative regulation of apoptotic signaling pathway | 4 | 4/43 | 228/18012 | 0.002096 | 0.015461 | 7.348837 | ENSG00000118503/ENSG00000171560/ENSG00000073756/ENSG00000240972 | TNFAIP3/FGA/PTGS2/MIF | GO_BP |
| GO:0002675~positive regulation of acute inflammatory response | 2 | 2/43 | 29/18012 | 0.00217 | 0.015495 | 28.88853 | ENSG00000073756/ENSG00000136244 | PTGS2/IL6 | GO_BP |
| GO:0006929~substrate-dependent cell migration | 2 | 2/43 | 29/18012 | 0.00217 | 0.015495 | 28.88853 | ENSG00000145147/ENSG00000118257 | SLIT2/NRP2 | GO_BP |
| GO:0010575~positive regulation of vascular endothelial growth factor production | 2 | 2/43 | 29/18012 | 0.00217 | 0.015495 | 28.88853 | ENSG00000073756/ENSG00000136244 | PTGS2/IL6 | GO_BP |
| GO:0021884~forebrain neuron development | 2 | 2/43 | 29/18012 | 0.00217 | 0.015495 | 28.88853 | ENSG00000145147/ENSG00000118257 | SLIT2/NRP2 | GO_BP |
| GO:0033032~regulation of myeloid cell apoptotic process | 2 | 2/43 | 29/18012 | 0.00217 | 0.015495 | 28.88853 | ENSG00000240972/ENSG00000180871 | MIF/CXCR2 | GO_BP |
| GO:0060142~regulation of syncytium formation by plasma membrane fusion | 2 | 2/43 | 29/18012 | 0.00217 | 0.015495 | 28.88853 | ENSG00000101096/ENSG00000161055 | NFATC2/SCGB3A1 | GO_BP |
| GO:0070229~negative regulation of lymphocyte apoptotic process | 2 | 2/43 | 29/18012 | 0.00217 | 0.015495 | 28.88853 | ENSG00000168685/ENSG00000240972 | IL7R/MIF | GO_BP |
| GO:0090022~regulation of neutrophil chemotaxis | 2 | 2/43 | 29/18012 | 0.00217 | 0.015495 | 28.88853 | ENSG00000145147/ENSG00000180871 | SLIT2/CXCR2 | GO_BP |
| GO:1904019~epithelial cell apoptotic process | 3 | 3/43 | 108/18012 | 0.002173 | 0.015495 | 11.63566 | ENSG00000118503/ENSG00000171560/ENSG00000136244 | TNFAIP3/FGA/IL6 | GO_BP |
| GO:0007569~cell aging | 3 | 3/43 | 109/18012 | 0.002231 | 0.015848 | 11.52891 | ENSG00000240972/ENSG00000174775/ENSG00000105835 | MIF/HRAS/NAMPT | GO_BP |
| GO:0001503~ossification | 5 | 5/43 | 389/18012 | 0.002245 | 0.01589 | 5.38411 | ENSG00000187608/ENSG00000073756/ENSG00000136244/ENSG00000109321/ENSG00000146648 | ISG15/PTGS2/IL6/AREG/EGFR | GO_BP |
| GO:0002768~immune response-regulating cell surface receptor signaling pathway | 5 | 5/43 | 390/18012 | 0.00227 | 0.015956 | 5.370304 | ENSG00000144802/ENSG00000101096/ENSG00000174775/ENSG00000119508/ENSG00000213658 | NFKBIZ/NFATC2/HRAS/NR4A3/LAT | GO_BP |
| GO:0032609~interferon-gamma production | 3 | 3/43 | 110/18012 | 0.00229 | 0.015956 | 11.4241 | ENSG00000187608/ENSG00000174775/ENSG00000122641 | ISG15/HRAS/INHBA | GO_BP |
| GO:0050663~cytokine secretion | 4 | 4/43 | 234/18012 | 0.002303 | 0.015956 | 7.160405 | ENSG00000187608/ENSG00000118503/ENSG00000240972/ENSG00000157873 | ISG15/TNFAIP3/MIF/TNFRSF14 | GO_BP |
| GO:0001782~B cell homeostasis | 2 | 2/43 | 30/18012 | 0.002321 | 0.015956 | 27.92558 | ENSG00000118503/ENSG00000240972 | TNFAIP3/MIF | GO_BP |
| GO:0045822~negative regulation of heart contraction | 2 | 2/43 | 30/18012 | 0.002321 | 0.015956 | 27.92558 | ENSG00000139574/ENSG00000267281 | NPFF/AC023509.3 | GO_BP |
| GO:0048710~regulation of astrocyte differentiation | 2 | 2/43 | 30/18012 | 0.002321 | 0.015956 | 27.92558 | ENSG00000136244/ENSG00000128342 | IL6/LIF | GO_BP |
| GO:0050869~negative regulation of B cell activation | 2 | 2/43 | 30/18012 | 0.002321 | 0.015956 | 27.92558 | ENSG00000118503/ENSG00000122641 | TNFAIP3/INHBA | GO_BP |
| GO:0061082~myeloid leukocyte cytokine production | 2 | 2/43 | 30/18012 | 0.002321 | 0.015956 | 27.92558 | ENSG00000240972/ENSG00000119508 | MIF/NR4A3 | GO_BP |
| GO:0042303~molting cycle | 3 | 3/43 | 111/18012 | 0.002349 | 0.016037 | 11.32118 | ENSG00000073756/ENSG00000122641/ENSG00000146648 | PTGS2/INHBA/EGFR | GO_BP |
| GO:0042633~hair cycle | 3 | 3/43 | 111/18012 | 0.002349 | 0.016037 | 11.32118 | ENSG00000073756/ENSG00000122641/ENSG00000146648 | PTGS2/INHBA/EGFR | GO_BP |
| GO:0038095~Fc-epsilon receptor signaling pathway | 3 | 3/43 | 112/18012 | 0.00241 | 0.016345 | 11.2201 | ENSG00000101096/ENSG00000119508/ENSG00000213658 | NFATC2/NR4A3/LAT | GO_BP |
| GO:0097237~cellular response to toxic substance | 4 | 4/43 | 237/18012 | 0.002412 | 0.016345 | 7.069767 | ENSG00000118503/ENSG00000073756/ENSG00000136244/ENSG00000119508 | TNFAIP3/PTGS2/IL6/NR4A3 | GO_BP |
| GO:0050851~antigen receptor-mediated signaling pathway | 4 | 4/43 | 238/18012 | 0.002449 | 0.016537 | 7.040063 | ENSG00000144802/ENSG00000101096/ENSG00000174775/ENSG00000213658 | NFKBIZ/NFATC2/HRAS/LAT | GO_BP |
| GO:0021987~cerebral cortex development | 3 | 3/43 | 113/18012 | 0.002472 | 0.016614 | 11.12081 | ENSG00000145147/ENSG00000146648/ENSG00000118257 | SLIT2/EGFR/NRP2 | GO_BP |
| GO:0045648~positive regulation of erythrocyte differentiation | 2 | 2/43 | 31/18012 | 0.002477 | 0.016614 | 27.02476 | ENSG00000187608/ENSG00000122641 | ISG15/INHBA | GO_BP |
| GO:0030217~T cell differentiation | 4 | 4/43 | 239/18012 | 0.002486 | 0.016614 | 7.010606 | ENSG00000144802/ENSG00000168685/ENSG00000136244/ENSG00000101096 | NFKBIZ/IL7R/IL6/NFATC2 | GO_BP |
| GO:0046660~female sex differentiation | 3 | 3/43 | 115/18012 | 0.002598 | 0.017302 | 10.9274 | ENSG00000145147/ENSG00000122641/ENSG00000104918 | SLIT2/INHBA/RETN | GO_BP |
| GO:0051968~positive regulation of synaptic transmission, glutamatergic | 2 | 2/43 | 32/18012 | 0.002638 | 0.017492 | 26.18023 | ENSG00000073756/ENSG00000146648 | PTGS2/EGFR | GO_BP |
| GO:2001233~regulation of apoptotic signaling pathway | 5 | 5/43 | 404/18012 | 0.002645 | 0.017492 | 5.184204 | ENSG00000118503/ENSG00000171560/ENSG00000073756/ENSG00000240972/ENSG00000122641 | TNFAIP3/FGA/PTGS2/MIF/INHBA | GO_BP |
| GO:0010574~regulation of vascular endothelial growth factor production | 2 | 2/43 | 33/18012 | 0.002804 | 0.018421 | 25.38689 | ENSG00000073756/ENSG00000136244 | PTGS2/IL6 | GO_BP |
| GO:2000352~negative regulation of endothelial cell apoptotic process | 2 | 2/43 | 33/18012 | 0.002804 | 0.018421 | 25.38689 | ENSG00000118503/ENSG00000171560 | TNFAIP3/FGA | GO_BP |
| GO:0045637~regulation of myeloid cell differentiation | 4 | 4/43 | 248/18012 | 0.002841 | 0.018517 | 6.756189 | ENSG00000187608/ENSG00000122641/ENSG00000128342/ENSG00000119508 | ISG15/INHBA/LIF/NR4A3 | GO_BP |
| GO:0045926~negative regulation of growth | 4 | 4/43 | 248/18012 | 0.002841 | 0.018517 | 6.756189 | ENSG00000130303/ENSG00000145147/ENSG00000122641/ENSG00000161055 | BST2/SLIT2/INHBA/SCGB3A1 | GO_BP |
| GO:0001558~regulation of cell growth | 5 | 5/43 | 411/18012 | 0.002848 | 0.018517 | 5.095909 | ENSG00000130303/ENSG00000145147/ENSG00000122641/ENSG00000161055/ENSG00000146648 | BST2/SLIT2/INHBA/SCGB3A1/EGFR | GO_BP |
| GO:0022612~gland morphogenesis | 3 | 3/43 | 120/18012 | 0.002931 | 0.01899 | 10.47209 | ENSG00000118503/ENSG00000109321/ENSG00000146648 | TNFAIP3/AREG/EGFR | GO_BP |
| GO:0014072~response to isoquinoline alkaloid | 2 | 2/43 | 34/18012 | 0.002975 | 0.019149 | 24.64022 | ENSG00000139574/ENSG00000267281 | NPFF/AC023509.3 | GO_BP |
| GO:0043278~response to morphine | 2 | 2/43 | 34/18012 | 0.002975 | 0.019149 | 24.64022 | ENSG00000139574/ENSG00000267281 | NPFF/AC023509.3 | GO_BP |
| GO:0019079~viral genome replication | 3 | 3/43 | 122/18012 | 0.003071 | 0.019698 | 10.30042 | ENSG00000187608/ENSG00000055332/ENSG00000130303 | ISG15/EIF2AK2/BST2 | GO_BP |
| GO:0010573~vascular endothelial growth factor production | 2 | 2/43 | 35/18012 | 0.003151 | 0.020011 | 23.93621 | ENSG00000073756/ENSG00000136244 | PTGS2/IL6 | GO_BP |
| GO:0010831~positive regulation of myotube differentiation | 2 | 2/43 | 35/18012 | 0.003151 | 0.020011 | 23.93621 | ENSG00000101096/ENSG00000161055 | NFATC2/SCGB3A1 | GO_BP |
| GO:1902622~regulation of neutrophil migration | 2 | 2/43 | 35/18012 | 0.003151 | 0.020011 | 23.93621 | ENSG00000145147/ENSG00000180871 | SLIT2/CXCR2 | GO_BP |
| GO:0043406~positive regulation of MAP kinase activity | 4 | 4/43 | 257/18012 | 0.003228 | 0.020435 | 6.519591 | ENSG00000055332/ENSG00000240972/ENSG00000174775/ENSG00000146648 | EIF2AK2/MIF/HRAS/EGFR | GO_BP |
| GO:0045740~positive regulation of DNA replication | 2 | 2/43 | 36/18012 | 0.003331 | 0.021017 | 23.27132 | ENSG00000174775/ENSG00000146648 | HRAS/EGFR | GO_BP |
| GO:0043114~regulation of vascular permeability | 2 | 2/43 | 37/18012 | 0.003516 | 0.021825 | 22.64236 | ENSG00000145147/ENSG00000180871 | SLIT2/CXCR2 | GO_BP |
| GO:0045777~positive regulation of blood pressure | 2 | 2/43 | 37/18012 | 0.003516 | 0.021825 | 22.64236 | ENSG00000139574/ENSG00000267281 | NPFF/AC023509.3 | GO_BP |
| GO:0045923~positive regulation of fatty acid metabolic process | 2 | 2/43 | 37/18012 | 0.003516 | 0.021825 | 22.64236 | ENSG00000073756/ENSG00000119508 | PTGS2/NR4A3 | GO_BP |
| GO:0048846~axon extension involved in axon guidance | 2 | 2/43 | 37/18012 | 0.003516 | 0.021825 | 22.64236 | ENSG00000145147/ENSG00000118257 | SLIT2/NRP2 | GO_BP |
| GO:1902284~neuron projection extension involved in neuron projection guidance | 2 | 2/43 | 37/18012 | 0.003516 | 0.021825 | 22.64236 | ENSG00000145147/ENSG00000118257 | SLIT2/NRP2 | GO_BP |
| GO:0050671~positive regulation of lymphocyte proliferation | 3 | 3/43 | 129/18012 | 0.003593 | 0.022233 | 9.741482 | ENSG00000136244/ENSG00000240972/ENSG00000101096 | IL6/MIF/NFATC2 | GO_BP |
| GO:0032946~positive regulation of mononuclear cell proliferation | 3 | 3/43 | 130/18012 | 0.003672 | 0.022647 | 9.666547 | ENSG00000136244/ENSG00000240972/ENSG00000101096 | IL6/MIF/NFATC2 | GO_BP |
| GO:0043434~response to peptide hormone | 5 | 5/43 | 437/18012 | 0.003703 | 0.022764 | 4.79272 | ENSG00000184557/ENSG00000073756/ENSG00000109321/ENSG00000104918/ENSG00000119508 | SOCS3/PTGS2/AREG/RETN/NR4A3 | GO_BP |
| GO:0046425~regulation of JAK-STAT cascade | 3 | 3/43 | 131/18012 | 0.003752 | 0.022992 | 9.592757 | ENSG00000184557/ENSG00000136244/ENSG00000128342 | SOCS3/IL6/LIF | GO_BP |
| GO:0002251~organ or tissue specific immune response | 2 | 2/43 | 39/18012 | 0.0039 | 0.023377 | 21.48122 | ENSG00000136244/ENSG00000164825 | IL6/DEFB1 | GO_BP |
| GO:0032094~response to food | 2 | 2/43 | 39/18012 | 0.0039 | 0.023377 | 21.48122 | ENSG00000139574/ENSG00000267281 | NPFF/AC023509.3 | GO_BP |
| GO:0042036~negative regulation of cytokine biosynthetic process | 2 | 2/43 | 39/18012 | 0.0039 | 0.023377 | 21.48122 | ENSG00000136244/ENSG00000122641 | IL6/INHBA | GO_BP |
| GO:0046676~negative regulation of insulin secretion | 2 | 2/43 | 39/18012 | 0.0039 | 0.023377 | 21.48122 | ENSG00000139574/ENSG00000267281 | NPFF/AC023509.3 | GO_BP |
| GO:0150077~regulation of neuroinflammatory response | 2 | 2/43 | 39/18012 | 0.0039 | 0.023377 | 21.48122 | ENSG00000073756/ENSG00000136244 | PTGS2/IL6 | GO_BP |
| GO:1902042~negative regulation of extrinsic apoptotic signaling pathway via death domain receptors | 2 | 2/43 | 39/18012 | 0.0039 | 0.023377 | 21.48122 | ENSG00000118503/ENSG00000171560 | TNFAIP3/FGA | GO_BP |
| GO:1903523~negative regulation of blood circulation | 2 | 2/43 | 39/18012 | 0.0039 | 0.023377 | 21.48122 | ENSG00000139574/ENSG00000267281 | NPFF/AC023509.3 | GO_BP |
| GO:0001889~liver development | 3 | 3/43 | 134/18012 | 0.003998 | 0.023814 | 9.377994 | ENSG00000118503/ENSG00000146648/ENSG00000197081 | TNFAIP3/EGFR/IGF2R | GO_BP |
| GO:0032355~response to estradiol | 3 | 3/43 | 134/18012 | 0.003998 | 0.023814 | 9.377994 | ENSG00000073756/ENSG00000109321/ENSG00000146648 | PTGS2/AREG/EGFR | GO_BP |
| GO:0050921~positive regulation of chemotaxis | 3 | 3/43 | 135/18012 | 0.004082 | 0.02424 | 9.308527 | ENSG00000136244/ENSG00000145147/ENSG00000180871 | IL6/SLIT2/CXCR2 | GO_BP |
| GO:0051930~regulation of sensory perception of pain | 2 | 2/43 | 40/18012 | 0.004099 | 0.024267 | 20.94419 | ENSG00000139574/ENSG00000267281 | NPFF/AC023509.3 | GO_BP |
| GO:0045088~regulation of innate immune response | 5 | 5/43 | 448/18012 | 0.004115 | 0.024287 | 4.675042 | ENSG00000184557/ENSG00000118503/ENSG00000171560/ENSG00000187908/ENSG00000174775 | SOCS3/TNFAIP3/FGA/DMBT1/HRAS | GO_BP |
| GO:0050709~negative regulation of protein secretion | 3 | 3/43 | 136/18012 | 0.004167 | 0.024518 | 9.240082 | ENSG00000118503/ENSG00000139574/ENSG00000267281 | TNFAIP3/NPFF/AC023509.3 | GO_BP |
| GO:0046631~alpha-beta T cell activation | 3 | 3/43 | 137/18012 | 0.004254 | 0.024873 | 9.172636 | ENSG00000144802/ENSG00000136244/ENSG00000157873 | NFKBIZ/IL6/TNFRSF14 | GO_BP |
| GO:0061008~hepaticobiliary system development | 3 | 3/43 | 137/18012 | 0.004254 | 0.024873 | 9.172636 | ENSG00000118503/ENSG00000146648/ENSG00000197081 | TNFAIP3/EGFR/IGF2R | GO_BP |
| GO:0007520~myoblast fusion | 2 | 2/43 | 41/18012 | 0.004303 | 0.024919 | 20.43335 | ENSG00000101096/ENSG00000161055 | NFATC2/SCGB3A1 | GO_BP |
| GO:0030890~positive regulation of B cell proliferation | 2 | 2/43 | 41/18012 | 0.004303 | 0.024919 | 20.43335 | ENSG00000240972/ENSG00000101096 | MIF/NFATC2 | GO_BP |
| GO:0051931~regulation of sensory perception | 2 | 2/43 | 41/18012 | 0.004303 | 0.024919 | 20.43335 | ENSG00000139574/ENSG00000267281 | NPFF/AC023509.3 | GO_BP |
| GO:0042326~negative regulation of phosphorylation | 5 | 5/43 | 453/18012 | 0.004313 | 0.024919 | 4.623441 | ENSG00000184557/ENSG00000118503/ENSG00000145147/ENSG00000122641/ENSG00000128342 | SOCS3/TNFAIP3/SLIT2/INHBA/LIF | GO_BP |
| GO:0045580~regulation of T cell differentiation | 3 | 3/43 | 138/18012 | 0.004341 | 0.025003 | 9.106168 | ENSG00000144802/ENSG00000168685/ENSG00000101096 | NFKBIZ/IL7R/NFATC2 | GO_BP |
| GO:0071236~cellular response to antibiotic | 3 | 3/43 | 139/18012 | 0.004429 | 0.025436 | 9.040656 | ENSG00000118503/ENSG00000136244/ENSG00000119508 | TNFAIP3/IL6/NR4A3 | GO_BP |
| GO:0035296~regulation of tube diameter | 3 | 3/43 | 140/18012 | 0.004519 | 0.025643 | 8.97608 | ENSG00000171560/ENSG00000073756/ENSG00000146648 | FGA/PTGS2/EGFR | GO_BP |
| GO:0050880~regulation of blood vessel size | 3 | 3/43 | 140/18012 | 0.004519 | 0.025643 | 8.97608 | ENSG00000171560/ENSG00000073756/ENSG00000146648 | FGA/PTGS2/EGFR | GO_BP |
| GO:0072073~kidney epithelium development | 3 | 3/43 | 140/18012 | 0.004519 | 0.025643 | 8.97608 | ENSG00000145147/ENSG00000180871/ENSG00000128342 | SLIT2/CXCR2/LIF | GO_BP |
| GO:0097746~regulation of blood vessel diameter | 3 | 3/43 | 140/18012 | 0.004519 | 0.025643 | 8.97608 | ENSG00000171560/ENSG00000073756/ENSG00000146648 | FGA/PTGS2/EGFR | GO_BP |
| GO:0035150~regulation of tube size | 3 | 3/43 | 141/18012 | 0.00461 | 0.02608 | 8.91242 | ENSG00000171560/ENSG00000073756/ENSG00000146648 | FGA/PTGS2/EGFR | GO_BP |
| GO:0061041~regulation of wound healing | 3 | 3/43 | 142/18012 | 0.004701 | 0.026189 | 8.849656 | ENSG00000118503/ENSG00000171560/ENSG00000174775 | TNFAIP3/FGA/HRAS | GO_BP |
| GO:0006692~prostanoid metabolic process | 2 | 2/43 | 43/18012 | 0.004724 | 0.026189 | 19.48296 | ENSG00000073756/ENSG00000240972 | PTGS2/MIF | GO_BP |
| GO:0006693~prostaglandin metabolic process | 2 | 2/43 | 43/18012 | 0.004724 | 0.026189 | 19.48296 | ENSG00000073756/ENSG00000240972 | PTGS2/MIF | GO_BP |
| GO:0010863~positive regulation of phospholipase C activity | 2 | 2/43 | 43/18012 | 0.004724 | 0.026189 | 19.48296 | ENSG00000174775/ENSG00000146648 | HRAS/EGFR | GO_BP |
| GO:0014002~astrocyte development | 2 | 2/43 | 43/18012 | 0.004724 | 0.026189 | 19.48296 | ENSG00000136244/ENSG00000146648 | IL6/EGFR | GO_BP |
| GO:0030225~macrophage differentiation | 2 | 2/43 | 43/18012 | 0.004724 | 0.026189 | 19.48296 | ENSG00000122641/ENSG00000128342 | INHBA/LIF | GO_BP |
| GO:0071622~regulation of granulocyte chemotaxis | 2 | 2/43 | 43/18012 | 0.004724 | 0.026189 | 19.48296 | ENSG00000145147/ENSG00000180871 | SLIT2/CXCR2 | GO_BP |
| GO:0002792~negative regulation of peptide secretion | 3 | 3/43 | 143/18012 | 0.004794 | 0.026422 | 8.78777 | ENSG00000118503/ENSG00000139574/ENSG00000267281 | TNFAIP3/NPFF/AC023509.3 | GO_BP |
| GO:1902107~positive regulation of leukocyte differentiation | 3 | 3/43 | 143/18012 | 0.004794 | 0.026422 | 8.78777 | ENSG00000144802/ENSG00000168685/ENSG00000128342 | NFKBIZ/IL7R/LIF | GO_BP |
| GO:0042063~gliogenesis | 4 | 4/43 | 288/18012 | 0.004839 | 0.026594 | 5.817829 | ENSG00000136244/ENSG00000109321/ENSG00000128342/ENSG00000146648 | IL6/AREG/LIF/EGFR | GO_BP |
| GO:0034599~cellular response to oxidative stress | 4 | 4/43 | 289/18012 | 0.004899 | 0.026844 | 5.797699 | ENSG00000118503/ENSG00000136244/ENSG00000146648/ENSG00000119508 | TNFAIP3/IL6/EGFR/NR4A3 | GO_BP |
| GO:0051250~negative regulation of lymphocyte activation | 3 | 3/43 | 145/18012 | 0.004983 | 0.027229 | 8.66656 | ENSG00000118503/ENSG00000122641/ENSG00000157873 | TNFAIP3/INHBA/TNFRSF14 | GO_BP |
| GO:2000241~regulation of reproductive process | 3 | 3/43 | 146/18012 | 0.005079 | 0.027666 | 8.6072 | ENSG00000122641/ENSG00000128342/ENSG00000104918 | INHBA/LIF/RETN | GO_BP |
| GO:0002686~negative regulation of leukocyte migration | 2 | 2/43 | 45/18012 | 0.005164 | 0.027666 | 18.61705 | ENSG00000240972/ENSG00000145147 | MIF/SLIT2 | GO_BP |
| GO:0002820~negative regulation of adaptive immune response | 2 | 2/43 | 45/18012 | 0.005164 | 0.027666 | 18.61705 | ENSG00000168685/ENSG00000157873 | IL7R/TNFRSF14 | GO_BP |
| GO:0032480~negative regulation of type I interferon production | 2 | 2/43 | 45/18012 | 0.005164 | 0.027666 | 18.61705 | ENSG00000187608/ENSG00000118503 | ISG15/TNFAIP3 | GO_BP |
| GO:0044060~regulation of endocrine process | 2 | 2/43 | 45/18012 | 0.005164 | 0.027666 | 18.61705 | ENSG00000122641/ENSG00000104918 | INHBA/RETN | GO_BP |
| GO:0071354~cellular response to interleukin-6 | 2 | 2/43 | 45/18012 | 0.005164 | 0.027666 | 18.61705 | ENSG00000184557/ENSG00000136244 | SOCS3/IL6 | GO_BP |
| GO:1900274~regulation of phospholipase C activity | 2 | 2/43 | 45/18012 | 0.005164 | 0.027666 | 18.61705 | ENSG00000174775/ENSG00000146648 | HRAS/EGFR | GO_BP |
| GO:0002758~innate immune response-activating signal transduction | 4 | 4/43 | 294/18012 | 0.005203 | 0.0278 | 5.699098 | ENSG00000118503/ENSG00000171560/ENSG00000187908/ENSG00000174775 | TNFAIP3/FGA/DMBT1/HRAS | GO_BP |
| GO:1903900~regulation of viral life cycle | 3 | 3/43 | 148/18012 | 0.005275 | 0.028103 | 8.490886 | ENSG00000187608/ENSG00000055332/ENSG00000130303 | ISG15/EIF2AK2/BST2 | GO_BP |
| GO:0034260~negative regulation of GTPase activity | 2 | 2/43 | 46/18012 | 0.00539 | 0.028326 | 18.21234 | ENSG00000174775/ENSG00000145147 | HRAS/SLIT2 | GO_BP |
| GO:0042059~negative regulation of epidermal growth factor receptor signaling pathway | 2 | 2/43 | 46/18012 | 0.00539 | 0.028326 | 18.21234 | ENSG00000109321/ENSG00000146648 | AREG/EGFR | GO_BP |
| GO:0050919~negative chemotaxis | 2 | 2/43 | 46/18012 | 0.00539 | 0.028326 | 18.21234 | ENSG00000145147/ENSG00000118257 | SLIT2/NRP2 | GO_BP |
| GO:0090278~negative regulation of peptide hormone secretion | 2 | 2/43 | 46/18012 | 0.00539 | 0.028326 | 18.21234 | ENSG00000139574/ENSG00000267281 | NPFF/AC023509.3 | GO_BP |
| GO:1904036~negative regulation of epithelial cell apoptotic process | 2 | 2/43 | 46/18012 | 0.00539 | 0.028326 | 18.21234 | ENSG00000118503/ENSG00000171560 | TNFAIP3/FGA | GO_BP |
| GO:0048871~multicellular organismal homeostasis | 5 | 5/43 | 481/18012 | 0.00555 | 0.028984 | 4.354301 | ENSG00000118503/ENSG00000073756/ENSG00000136244/ENSG00000146648/ENSG00000119508 | TNFAIP3/PTGS2/IL6/EGFR/NR4A3 | GO_BP |
| GO:0007259~JAK-STAT cascade | 3 | 3/43 | 151/18012 | 0.005577 | 0.028984 | 8.322193 | ENSG00000184557/ENSG00000136244/ENSG00000128342 | SOCS3/IL6/LIF | GO_BP |
| GO:1905952~regulation of lipid localization | 3 | 3/43 | 151/18012 | 0.005577 | 0.028984 | 8.322193 | ENSG00000136244/ENSG00000240972/ENSG00000104918 | IL6/MIF/RETN | GO_BP |
| GO:0001774~microglial cell activation | 2 | 2/43 | 47/18012 | 0.005622 | 0.028984 | 17.82484 | ENSG00000136244/ENSG00000105835 | IL6/NAMPT | GO_BP |
| GO:0002269~leukocyte activation involved in inflammatory response | 2 | 2/43 | 47/18012 | 0.005622 | 0.028984 | 17.82484 | ENSG00000136244/ENSG00000105835 | IL6/NAMPT | GO_BP |
| GO:0006953~acute-phase response | 2 | 2/43 | 47/18012 | 0.005622 | 0.028984 | 17.82484 | ENSG00000073756/ENSG00000136244 | PTGS2/IL6 | GO_BP |
| GO:0045646~regulation of erythrocyte differentiation | 2 | 2/43 | 47/18012 | 0.005622 | 0.028984 | 17.82484 | ENSG00000187608/ENSG00000122641 | ISG15/INHBA | GO_BP |
| GO:0043303~mast cell degranulation | 2 | 2/43 | 48/18012 | 0.005857 | 0.030038 | 17.45349 | ENSG00000119508/ENSG00000213658 | NR4A3/LAT | GO_BP |
| GO:0060986~endocrine hormone secretion | 2 | 2/43 | 48/18012 | 0.005857 | 0.030038 | 17.45349 | ENSG00000122641/ENSG00000104918 | INHBA/RETN | GO_BP |
| GO:2001236~regulation of extrinsic apoptotic signaling pathway | 3 | 3/43 | 154/18012 | 0.005889 | 0.03012 | 8.160072 | ENSG00000118503/ENSG00000171560/ENSG00000122641 | TNFAIP3/FGA/INHBA | GO_BP |
| GO:0034612~response to tumor necrosis factor | 4 | 4/43 | 306/18012 | 0.005987 | 0.030538 | 5.475604 | ENSG00000118503/ENSG00000073756/ENSG00000106178/ENSG00000157873 | TNFAIP3/PTGS2/CCL24/TNFRSF14 | GO_BP |
| GO:0002279~mast cell activation involved in immune response | 2 | 2/43 | 49/18012 | 0.006097 | 0.030694 | 17.09729 | ENSG00000119508/ENSG00000213658 | NR4A3/LAT | GO_BP |
| GO:0002704~negative regulation of leukocyte mediated immunity | 2 | 2/43 | 49/18012 | 0.006097 | 0.030694 | 17.09729 | ENSG00000130303/ENSG00000168685 | BST2/IL7R | GO_BP |
| GO:0003254~regulation of membrane depolarization | 2 | 2/43 | 49/18012 | 0.006097 | 0.030694 | 17.09729 | ENSG00000139574/ENSG00000267281 | NPFF/AC023509.3 | GO_BP |
| GO:0014009~glial cell proliferation | 2 | 2/43 | 49/18012 | 0.006097 | 0.030694 | 17.09729 | ENSG00000136244/ENSG00000109321 | IL6/AREG | GO_BP |
| GO:0070741~response to interleukin-6 | 2 | 2/43 | 49/18012 | 0.006097 | 0.030694 | 17.09729 | ENSG00000184557/ENSG00000136244 | SOCS3/IL6 | GO_BP |
| GO:0002448~mast cell mediated immunity | 2 | 2/43 | 50/18012 | 0.006342 | 0.031758 | 16.75535 | ENSG00000119508/ENSG00000213658 | NR4A3/LAT | GO_BP |
| GO:0007566~embryo implantation | 2 | 2/43 | 50/18012 | 0.006342 | 0.031758 | 16.75535 | ENSG00000073756/ENSG00000128342 | PTGS2/LIF | GO_BP |
| GO:1901185~negative regulation of ERBB signaling pathway | 2 | 2/43 | 51/18012 | 0.006591 | 0.032919 | 16.42681 | ENSG00000109321/ENSG00000146648 | AREG/EGFR | GO_BP |
| GO:0002218~activation of innate immune response | 4 | 4/43 | 315/18012 | 0.006623 | 0.032996 | 5.319158 | ENSG00000118503/ENSG00000171560/ENSG00000187908/ENSG00000174775 | TNFAIP3/FGA/DMBT1/HRAS | GO_BP |
| GO:0007204~positive regulation of cytosolic calcium ion concentration | 4 | 4/43 | 317/18012 | 0.006771 | 0.033643 | 5.285599 | ENSG00000163464/ENSG00000180871/ENSG00000139574/ENSG00000267281 | CXCR1/CXCR2/NPFF/AC023509.3 | GO_BP |
| GO:0006968~cellular defense response | 2 | 2/43 | 52/18012 | 0.006844 | 0.033919 | 16.11091 | ENSG00000115523/ENSG00000180871 | GNLY/CXCR2 | GO_BP |
| GO:0046677~response to antibiotic | 4 | 4/43 | 320/18012 | 0.006996 | 0.034535 | 5.236047 | ENSG00000118503/ENSG00000136244/ENSG00000109321/ENSG00000119508 | TNFAIP3/IL6/AREG/NR4A3 | GO_BP |
| GO:0035821~modification of morphology or physiology of other organism | 3 | 3/43 | 164/18012 | 0.007004 | 0.034535 | 7.662507 | ENSG00000115523/ENSG00000055332/ENSG00000197081 | GNLY/EIF2AK2/IGF2R | GO_BP |
| GO:0000186~activation of MAPKK activity | 2 | 2/43 | 53/18012 | 0.007102 | 0.034658 | 15.80693 | ENSG00000055332/ENSG00000146648 | EIF2AK2/EGFR | GO_BP |
| GO:0006636~unsaturated fatty acid biosynthetic process | 2 | 2/43 | 53/18012 | 0.007102 | 0.034658 | 15.80693 | ENSG00000073756/ENSG00000240972 | PTGS2/MIF | GO_BP |
| GO:0070228~regulation of lymphocyte apoptotic process | 2 | 2/43 | 53/18012 | 0.007102 | 0.034658 | 15.80693 | ENSG00000168685/ENSG00000240972 | IL7R/MIF | GO_BP |
| GO:0090342~regulation of cell aging | 2 | 2/43 | 53/18012 | 0.007102 | 0.034658 | 15.80693 | ENSG00000240972/ENSG00000105835 | MIF/NAMPT | GO_BP |
| GO:1903829~positive regulation of cellular protein localization | 4 | 4/43 | 322/18012 | 0.007149 | 0.034799 | 5.203524 | ENSG00000073756/ENSG00000174775/ENSG00000128342/ENSG00000146648 | PTGS2/HRAS/LIF/EGFR | GO_BP |
| GO:0043030~regulation of macrophage activation | 2 | 2/43 | 54/18012 | 0.007364 | 0.035754 | 15.51421 | ENSG00000136244/ENSG00000240972 | IL6/MIF | GO_BP |
| GO:0032496~response to lipopolysaccharide | 4 | 4/43 | 325/18012 | 0.007382 | 0.035754 | 5.155492 | ENSG00000118503/ENSG00000073756/ENSG00000136244/ENSG00000240972 | TNFAIP3/PTGS2/IL6/MIF | GO_BP |
| GO:0050806~positive regulation of synaptic transmission | 3 | 3/43 | 169/18012 | 0.007606 | 0.036746 | 7.435806 | ENSG00000073756/ENSG00000104918/ENSG00000146648 | PTGS2/RETN/EGFR | GO_BP |
| GO:0046456~icosanoid biosynthetic process | 2 | 2/43 | 55/18012 | 0.00763 | 0.036769 | 15.23214 | ENSG00000073756/ENSG00000240972 | PTGS2/MIF | GO_BP |
| GO:0071214~cellular response to abiotic stimulus | 4 | 4/43 | 331/18012 | 0.007864 | 0.037508 | 5.062039 | ENSG00000073756/ENSG00000174775/ENSG00000105835/ENSG00000146648 | PTGS2/HRAS/NAMPT/EGFR | GO_BP |
| GO:0104004~cellular response to environmental stimulus | 4 | 4/43 | 331/18012 | 0.007864 | 0.037508 | 5.062039 | ENSG00000073756/ENSG00000174775/ENSG00000105835/ENSG00000146648 | PTGS2/HRAS/NAMPT/EGFR | GO_BP |
| GO:0000768~syncytium formation by plasma membrane fusion | 2 | 2/43 | 56/18012 | 0.007901 | 0.037508 | 14.96013 | ENSG00000101096/ENSG00000161055 | NFATC2/SCGB3A1 | GO_BP |
| GO:0009435~NAD biosynthetic process | 2 | 2/43 | 56/18012 | 0.007901 | 0.037508 | 14.96013 | ENSG00000073756/ENSG00000105835 | PTGS2/NAMPT | GO_BP |
| GO:0140253~cell-cell fusion | 2 | 2/43 | 56/18012 | 0.007901 | 0.037508 | 14.96013 | ENSG00000101096/ENSG00000161055 | NFATC2/SCGB3A1 | GO_BP |
| GO:2000351~regulation of endothelial cell apoptotic process | 2 | 2/43 | 56/18012 | 0.007901 | 0.037508 | 14.96013 | ENSG00000118503/ENSG00000171560 | TNFAIP3/FGA | GO_BP |
| GO:0071902~positive regulation of protein serine/threonine kinase activity | 4 | 4/43 | 332/18012 | 0.007946 | 0.03763 | 5.046792 | ENSG00000055332/ENSG00000240972/ENSG00000174775/ENSG00000146648 | EIF2AK2/MIF/HRAS/EGFR | GO_BP |
| GO:1903034~regulation of response to wounding | 3 | 3/43 | 172/18012 | 0.007981 | 0.037704 | 7.306111 | ENSG00000118503/ENSG00000171560/ENSG00000174775 | TNFAIP3/FGA/HRAS | GO_BP |
| GO:0042093~T-helper cell differentiation | 2 | 2/43 | 57/18012 | 0.008176 | 0.038528 | 14.69767 | ENSG00000144802/ENSG00000136244 | NFKBIZ/IL6 | GO_BP |
| GO:0002695~negative regulation of leukocyte activation | 3 | 3/43 | 174/18012 | 0.008237 | 0.038724 | 7.222133 | ENSG00000118503/ENSG00000122641/ENSG00000157873 | TNFAIP3/INHBA/TNFRSF14 | GO_BP |
| GO:0043405~regulation of MAP kinase activity | 4 | 4/43 | 336/18012 | 0.008281 | 0.038832 | 4.986711 | ENSG00000055332/ENSG00000240972/ENSG00000174775/ENSG00000146648 | EIF2AK2/MIF/HRAS/EGFR | GO_BP |
| GO:0032956~regulation of actin cytoskeleton organization | 4 | 4/43 | 337/18012 | 0.008366 | 0.039076 | 4.971914 | ENSG00000130303/ENSG00000106178/ENSG00000174775/ENSG00000145147 | BST2/CCL24/HRAS/SLIT2 | GO_BP |
| GO:0002237~response to molecule of bacterial origin | 4 | 4/43 | 338/18012 | 0.008451 | 0.039076 | 4.957204 | ENSG00000118503/ENSG00000073756/ENSG00000136244/ENSG00000240972 | TNFAIP3/PTGS2/IL6/MIF | GO_BP |
| GO:0071496~cellular response to external stimulus | 4 | 4/43 | 338/18012 | 0.008451 | 0.039076 | 4.957204 | ENSG00000055332/ENSG00000073756/ENSG00000105835/ENSG00000146648 | EIF2AK2/PTGS2/NAMPT/EGFR | GO_BP |
| GO:0006949~syncytium formation | 2 | 2/43 | 58/18012 | 0.008455 | 0.039076 | 14.44427 | ENSG00000101096/ENSG00000161055 | NFATC2/SCGB3A1 | GO_BP |
| GO:0031663~lipopolysaccharide-mediated signaling pathway | 2 | 2/43 | 58/18012 | 0.008455 | 0.039076 | 14.44427 | ENSG00000118503/ENSG00000240972 | TNFAIP3/MIF | GO_BP |
| GO:1902041~regulation of extrinsic apoptotic signaling pathway via death domain receptors | 2 | 2/43 | 58/18012 | 0.008455 | 0.039076 | 14.44427 | ENSG00000118503/ENSG00000171560 | TNFAIP3/FGA | GO_BP |
| GO:0002294~CD4-positive, alpha-beta T cell differentiation involved in immune response | 2 | 2/43 | 59/18012 | 0.008738 | 0.04 | 14.19945 | ENSG00000144802/ENSG00000136244 | NFKBIZ/IL6 | GO_BP |
| GO:0010518~positive regulation of phospholipase activity | 2 | 2/43 | 59/18012 | 0.008738 | 0.04 | 14.19945 | ENSG00000174775/ENSG00000146648 | HRAS/EGFR | GO_BP |
| GO:0010830~regulation of myotube differentiation | 2 | 2/43 | 59/18012 | 0.008738 | 0.04 | 14.19945 | ENSG00000101096/ENSG00000161055 | NFATC2/SCGB3A1 | GO_BP |
| GO:0050922~negative regulation of chemotaxis | 2 | 2/43 | 59/18012 | 0.008738 | 0.04 | 14.19945 | ENSG00000240972/ENSG00000145147 | MIF/SLIT2 | GO_BP |
| GO:0002287~alpha-beta T cell activation involved in immune response | 2 | 2/43 | 60/18012 | 0.009026 | 0.040966 | 13.96279 | ENSG00000144802/ENSG00000136244 | NFKBIZ/IL6 | GO_BP |
| GO:0002293~alpha-beta T cell differentiation involved in immune response | 2 | 2/43 | 60/18012 | 0.009026 | 0.040966 | 13.96279 | ENSG00000144802/ENSG00000136244 | NFKBIZ/IL6 | GO_BP |
| GO:0032370~positive regulation of lipid transport | 2 | 2/43 | 60/18012 | 0.009026 | 0.040966 | 13.96279 | ENSG00000240972/ENSG00000104918 | MIF/RETN | GO_BP |
| GO:0038093~Fc receptor signaling pathway | 3 | 3/43 | 180/18012 | 0.009035 | 0.040966 | 6.981395 | ENSG00000101096/ENSG00000119508/ENSG00000213658 | NFATC2/NR4A3/LAT | GO_BP |
| GO:0061138~morphogenesis of a branching epithelium | 3 | 3/43 | 182/18012 | 0.00931 | 0.041953 | 6.904677 | ENSG00000184557/ENSG00000145147/ENSG00000109321 | SOCS3/SLIT2/AREG | GO_BP |
| GO:0030888~regulation of B cell proliferation | 2 | 2/43 | 61/18012 | 0.009318 | 0.041953 | 13.73389 | ENSG00000240972/ENSG00000101096 | MIF/NFATC2 | GO_BP |
| GO:0045576~mast cell activation | 2 | 2/43 | 61/18012 | 0.009318 | 0.041953 | 13.73389 | ENSG00000119508/ENSG00000213658 | NR4A3/LAT | GO_BP |
| GO:0021953~central nervous system neuron differentiation | 3 | 3/43 | 183/18012 | 0.00945 | 0.042447 | 6.866946 | ENSG00000145147/ENSG00000122641/ENSG00000118257 | SLIT2/INHBA/NRP2 | GO_BP |
| GO:0072577~endothelial cell apoptotic process | 2 | 2/43 | 62/18012 | 0.009614 | 0.043084 | 13.51238 | ENSG00000118503/ENSG00000171560 | TNFAIP3/FGA | GO_BP |
| GO:0022412~cellular process involved in reproduction in multicellular organism | 4 | 4/43 | 355/18012 | 0.009997 | 0.044593 | 4.719817 | ENSG00000164825/ENSG00000145147/ENSG00000122641/ENSG00000104918 | DEFB1/SLIT2/INHBA/RETN | GO_BP |
| GO:0051480~regulation of cytosolic calcium ion concentration | 4 | 4/43 | 355/18012 | 0.009997 | 0.044593 | 4.719817 | ENSG00000163464/ENSG00000180871/ENSG00000139574/ENSG00000267281 | CXCR1/CXCR2/NPFF/AC023509.3 | GO_BP |
| GO:0043902~positive regulation of multi-organism process | 3 | 3/43 | 187/18012 | 0.010021 | 0.044593 | 6.72006 | ENSG00000240972/ENSG00000122641/ENSG00000197081 | MIF/INHBA/IGF2R | GO_BP |
| GO:0051224~negative regulation of protein transport | 3 | 3/43 | 188/18012 | 0.010166 | 0.045137 | 6.684315 | ENSG00000118503/ENSG00000139574/ENSG00000267281 | TNFAIP3/NPFF/AC023509.3 | GO_BP |
| GO:0046579~positive regulation of Ras protein signal transduction | 2 | 2/43 | 64/18012 | 0.010219 | 0.045265 | 13.09012 | ENSG00000174775/ENSG00000187266 | HRAS/EPOR | GO_BP |
| GO:0045766~positive regulation of angiogenesis | 3 | 3/43 | 191/18012 | 0.010611 | 0.046787 | 6.579325 | ENSG00000073756/ENSG00000106178/ENSG00000180871 | PTGS2/CCL24/CXCR2 | GO_BP |
| GO:0071478~cellular response to radiation | 3 | 3/43 | 191/18012 | 0.010611 | 0.046787 | 6.579325 | ENSG00000073756/ENSG00000174775/ENSG00000105835 | PTGS2/HRAS/NAMPT | GO_BP |
| GO:1904950~negative regulation of establishment of protein localization | 3 | 3/43 | 192/18012 | 0.010762 | 0.047342 | 6.545058 | ENSG00000118503/ENSG00000139574/ENSG00000267281 | TNFAIP3/NPFF/AC023509.3 | GO_BP |
| GO:0051155~positive regulation of striated muscle cell differentiation | 2 | 2/43 | 66/18012 | 0.01084 | 0.047577 | 12.69345 | ENSG00000101096/ENSG00000161055 | NFATC2/SCGB3A1 | GO_BP |
| GO:0030278~regulation of ossification | 3 | 3/43 | 194/18012 | 0.011067 | 0.048352 | 6.477583 | ENSG00000187608/ENSG00000136244/ENSG00000109321 | ISG15/IL6/AREG | GO_BP |
| GO:0050852~T cell receptor signaling pathway | 3 | 3/43 | 194/18012 | 0.011067 | 0.048352 | 6.477583 | ENSG00000144802/ENSG00000174775/ENSG00000213658 | NFKBIZ/HRAS/LAT | GO_BP |
| GO:0002292~T cell differentiation involved in immune response | 2 | 2/43 | 67/18012 | 0.011157 | 0.048584 | 12.50399 | ENSG00000144802/ENSG00000136244 | NFKBIZ/IL6 | GO_BP |
| GO:0002221~pattern recognition receptor signaling pathway | 3 | 3/43 | 195/18012 | 0.011221 | 0.048584 | 6.444365 | ENSG00000118503/ENSG00000171560/ENSG00000187908 | TNFAIP3/FGA/DMBT1 | GO_BP |
| GO:0031099~regeneration | 3 | 3/43 | 195/18012 | 0.011221 | 0.048584 | 6.444365 | ENSG00000146648/ENSG00000197081/ENSG00000119508 | EGFR/IGF2R/NR4A3 | GO_BP |
| GO:0034341~response to interferon-gamma | 3 | 3/43 | 195/18012 | 0.011221 | 0.048584 | 6.444365 | ENSG00000184557/ENSG00000130303/ENSG00000106178 | SOCS3/BST2/CCL24 | GO_BP |
| GO:0001763~morphogenesis of a branching structure | 3 | 3/43 | 196/18012 | 0.011377 | 0.049147 | 6.411486 | ENSG00000184557/ENSG00000145147/ENSG00000109321 | SOCS3/SLIT2/AREG | GO_BP |
| GO:0050866~negative regulation of cell activation | 3 | 3/43 | 198/18012 | 0.011692 | 0.050395 | 6.346723 | ENSG00000118503/ENSG00000122641/ENSG00000157873 | TNFAIP3/INHBA/TNFRSF14 | GO_BP |
| GO:0002709~regulation of T cell mediated immunity | 2 | 2/43 | 69/18012 | 0.011802 | 0.050417 | 12.14156 | ENSG00000168685/ENSG00000136244 | IL7R/IL6 | GO_BP |
| GO:0051966~regulation of synaptic transmission, glutamatergic | 2 | 2/43 | 69/18012 | 0.011802 | 0.050417 | 12.14156 | ENSG00000073756/ENSG00000146648 | PTGS2/EGFR | GO_BP |
| GO:0070227~lymphocyte apoptotic process | 2 | 2/43 | 69/18012 | 0.011802 | 0.050417 | 12.14156 | ENSG00000168685/ENSG00000240972 | IL7R/MIF | GO_BP |
| GO:2000243~positive regulation of reproductive process | 2 | 2/43 | 69/18012 | 0.011802 | 0.050417 | 12.14156 | ENSG00000122641/ENSG00000104918 | INHBA/RETN | GO_BP |
| GO:0002703~regulation of leukocyte mediated immunity | 3 | 3/43 | 200/18012 | 0.012013 | 0.051087 | 6.283256 | ENSG00000130303/ENSG00000168685/ENSG00000136244 | BST2/IL7R/IL6 | GO_BP |
| GO:0071222~cellular response to lipopolysaccharide | 3 | 3/43 | 200/18012 | 0.012013 | 0.051087 | 6.283256 | ENSG00000118503/ENSG00000136244/ENSG00000240972 | TNFAIP3/IL6/MIF | GO_BP |
| GO:0010517~regulation of phospholipase activity | 2 | 2/43 | 70/18012 | 0.012131 | 0.051477 | 11.96811 | ENSG00000174775/ENSG00000146648 | HRAS/EGFR | GO_BP |
| GO:0045089~positive regulation of innate immune response | 4 | 4/43 | 377/18012 | 0.012258 | 0.051899 | 4.44439 | ENSG00000118503/ENSG00000171560/ENSG00000187908/ENSG00000174775 | TNFAIP3/FGA/DMBT1/HRAS | GO_BP |
| GO:0001960~negative regulation of cytokine-mediated signaling pathway | 2 | 2/43 | 71/18012 | 0.012464 | 0.052426 | 11.79954 | ENSG00000136244/ENSG00000145147 | IL6/SLIT2 | GO_BP |
| GO:0051057~positive regulation of small GTPase mediated signal transduction | 2 | 2/43 | 71/18012 | 0.012464 | 0.052426 | 11.79954 | ENSG00000174775/ENSG00000187266 | HRAS/EPOR | GO_BP |
| GO:0071479~cellular response to ionizing radiation | 2 | 2/43 | 71/18012 | 0.012464 | 0.052426 | 11.79954 | ENSG00000174775/ENSG00000105835 | HRAS/NAMPT | GO_BP |
| GO:0032970~regulation of actin filament-based process | 4 | 4/43 | 380/18012 | 0.012589 | 0.052836 | 4.409302 | ENSG00000130303/ENSG00000106178/ENSG00000174775/ENSG00000145147 | BST2/CCL24/HRAS/SLIT2 | GO_BP |
| GO:0050707~regulation of cytokine secretion | 3 | 3/43 | 204/18012 | 0.012668 | 0.053051 | 6.160055 | ENSG00000118503/ENSG00000240972/ENSG00000157873 | TNFAIP3/MIF/TNFRSF14 | GO_BP |
| GO:0045685~regulation of glial cell differentiation | 2 | 2/43 | 72/18012 | 0.012801 | 0.053259 | 11.63566 | ENSG00000136244/ENSG00000128342 | IL6/LIF | GO_BP |
| GO:0050795~regulation of behavior | 2 | 2/43 | 72/18012 | 0.012801 | 0.053259 | 11.63566 | ENSG00000104918/ENSG00000119508 | RETN/NR4A3 | GO_BP |
| GO:0090398~cellular senescence | 2 | 2/43 | 72/18012 | 0.012801 | 0.053259 | 11.63566 | ENSG00000174775/ENSG00000105835 | HRAS/NAMPT | GO_BP |
| GO:0014015~positive regulation of gliogenesis | 2 | 2/43 | 73/18012 | 0.013142 | 0.054102 | 11.47627 | ENSG00000136244/ENSG00000128342 | IL6/LIF | GO_BP |
| GO:0014910~regulation of smooth muscle cell migration | 2 | 2/43 | 73/18012 | 0.013142 | 0.054102 | 11.47627 | ENSG00000145147/ENSG00000119508 | SLIT2/NR4A3 | GO_BP |
| GO:0043367~CD4-positive, alpha-beta T cell differentiation | 2 | 2/43 | 73/18012 | 0.013142 | 0.054102 | 11.47627 | ENSG00000144802/ENSG00000136244 | NFKBIZ/IL6 | GO_BP |
| GO:0060193~positive regulation of lipase activity | 2 | 2/43 | 73/18012 | 0.013142 | 0.054102 | 11.47627 | ENSG00000174775/ENSG00000146648 | HRAS/EGFR | GO_BP |
| GO:0010594~regulation of endothelial cell migration | 3 | 3/43 | 207/18012 | 0.013173 | 0.054102 | 6.070779 | ENSG00000073756/ENSG00000145147/ENSG00000118257 | PTGS2/SLIT2/NRP2 | GO_BP |
| GO:0071219~cellular response to molecule of bacterial origin | 3 | 3/43 | 207/18012 | 0.013173 | 0.054102 | 6.070779 | ENSG00000118503/ENSG00000136244/ENSG00000240972 | TNFAIP3/IL6/MIF | GO_BP |
| GO:0001707~mesoderm formation | 2 | 2/43 | 74/18012 | 0.013487 | 0.055154 | 11.32118 | ENSG00000122641/ENSG00000119508 | INHBA/NR4A3 | GO_BP |
| GO:0061844~antimicrobial humoral immune response mediated by antimicrobial peptide | 2 | 2/43 | 74/18012 | 0.013487 | 0.055154 | 11.32118 | ENSG00000115523/ENSG00000164825 | GNLY/DEFB1 | GO_BP |
| GO:0051701~interaction with host | 3 | 3/43 | 209/18012 | 0.013516 | 0.055157 | 6.012685 | ENSG00000055332/ENSG00000146648/ENSG00000157873 | EIF2AK2/EGFR/TNFRSF14 | GO_BP |
| GO:0009612~response to mechanical stimulus | 3 | 3/43 | 210/18012 | 0.013689 | 0.055746 | 5.984053 | ENSG00000073756/ENSG00000104918/ENSG00000146648 | PTGS2/RETN/EGFR | GO_BP |
| GO:0032418~lysosome localization | 2 | 2/43 | 75/18012 | 0.013835 | 0.055984 | 11.17023 | ENSG00000119508/ENSG00000213658 | NR4A3/LAT | GO_BP |
| GO:0060411~cardiac septum morphogenesis | 2 | 2/43 | 75/18012 | 0.013835 | 0.055984 | 11.17023 | ENSG00000145147/ENSG00000118257 | SLIT2/NRP2 | GO_BP |
| GO:1900182~positive regulation of protein localization to nucleus | 2 | 2/43 | 75/18012 | 0.013835 | 0.055984 | 11.17023 | ENSG00000073756/ENSG00000128342 | PTGS2/LIF | GO_BP |
| GO:0019674~NAD metabolic process | 2 | 2/43 | 76/18012 | 0.014188 | 0.05715 | 11.02326 | ENSG00000073756/ENSG00000105835 | PTGS2/NAMPT | GO_BP |
| GO:0048332~mesoderm morphogenesis | 2 | 2/43 | 76/18012 | 0.014188 | 0.05715 | 11.02326 | ENSG00000122641/ENSG00000119508 | INHBA/NR4A3 | GO_BP |
| GO:0010876~lipid localization | 4 | 4/43 | 394/18012 | 0.014213 | 0.05715 | 4.252627 | ENSG00000136244/ENSG00000240972/ENSG00000122641/ENSG00000104918 | IL6/MIF/INHBA/RETN | GO_BP |
| GO:1904018~positive regulation of vasculature development | 3 | 3/43 | 214/18012 | 0.014396 | 0.057763 | 5.872202 | ENSG00000073756/ENSG00000106178/ENSG00000180871 | PTGS2/CCL24/CXCR2 | GO_BP |
| GO:0060761~negative regulation of response to cytokine stimulus | 2 | 2/43 | 77/18012 | 0.014544 | 0.058117 | 10.8801 | ENSG00000136244/ENSG00000145147 | IL6/SLIT2 | GO_BP |
| GO:1901224~positive regulation of NIK/NF-kappaB signaling | 2 | 2/43 | 77/18012 | 0.014544 | 0.058117 | 10.8801 | ENSG00000055332/ENSG00000146648 | EIF2AK2/EGFR | GO_BP |
| GO:0021954~central nervous system neuron development | 2 | 2/43 | 78/18012 | 0.014905 | 0.059078 | 10.74061 | ENSG00000145147/ENSG00000118257 | SLIT2/NRP2 | GO_BP |
| GO:0031397~negative regulation of protein ubiquitination | 2 | 2/43 | 78/18012 | 0.014905 | 0.059078 | 10.74061 | ENSG00000187608/ENSG00000118503 | ISG15/TNFAIP3 | GO_BP |
| GO:0070664~negative regulation of leukocyte proliferation | 2 | 2/43 | 78/18012 | 0.014905 | 0.059078 | 10.74061 | ENSG00000118503/ENSG00000157873 | TNFAIP3/TNFRSF14 | GO_BP |
| GO:0008406~gonad development | 3 | 3/43 | 217/18012 | 0.014939 | 0.059078 | 5.791019 | ENSG00000145147/ENSG00000122641/ENSG00000104918 | SLIT2/INHBA/RETN | GO_BP |
| GO:0010001~glial cell differentiation | 3 | 3/43 | 217/18012 | 0.014939 | 0.059078 | 5.791019 | ENSG00000136244/ENSG00000128342/ENSG00000146648 | IL6/LIF/EGFR | GO_BP |
| GO:0071260~cellular response to mechanical stimulus | 2 | 2/43 | 79/18012 | 0.015269 | 0.060259 | 10.60465 | ENSG00000073756/ENSG00000146648 | PTGS2/EGFR | GO_BP |
| GO:0014909~smooth muscle cell migration | 2 | 2/43 | 80/18012 | 0.015637 | 0.061333 | 10.47209 | ENSG00000145147/ENSG00000119508 | SLIT2/NR4A3 | GO_BP |
| GO:0072347~response to anesthetic | 2 | 2/43 | 80/18012 | 0.015637 | 0.061333 | 10.47209 | ENSG00000139574/ENSG00000267281 | NPFF/AC023509.3 | GO_BP |
| GO:1905954~positive regulation of lipid localization | 2 | 2/43 | 80/18012 | 0.015637 | 0.061333 | 10.47209 | ENSG00000240972/ENSG00000104918 | MIF/RETN | GO_BP |
| GO:0110110~positive regulation of animal organ morphogenesis | 2 | 2/43 | 81/18012 | 0.016009 | 0.062607 | 10.34281 | ENSG00000118503/ENSG00000128342 | TNFAIP3/LIF | GO_BP |
| GO:0001894~tissue homeostasis | 3 | 3/43 | 223/18012 | 0.01606 | 0.062607 | 5.635207 | ENSG00000118503/ENSG00000136244/ENSG00000146648 | TNFAIP3/IL6/EGFR | GO_BP |
| GO:0045137~development of primary sexual characteristics | 3 | 3/43 | 223/18012 | 0.01606 | 0.062607 | 5.635207 | ENSG00000145147/ENSG00000122641/ENSG00000104918 | SLIT2/INHBA/RETN | GO_BP |
| GO:0045582~positive regulation of T cell differentiation | 2 | 2/43 | 82/18012 | 0.016384 | 0.063743 | 10.21668 | ENSG00000144802/ENSG00000168685 | NFKBIZ/IL7R | GO_BP |
| GO:0030099~myeloid cell differentiation | 4 | 4/43 | 412/18012 | 0.01649 | 0.064023 | 4.066832 | ENSG00000187608/ENSG00000122641/ENSG00000128342/ENSG00000119508 | ISG15/INHBA/LIF/NR4A3 | GO_BP |
| GO:0001933~negative regulation of protein phosphorylation | 4 | 4/43 | 414/18012 | 0.016756 | 0.064694 | 4.047186 | ENSG00000184557/ENSG00000118503/ENSG00000145147/ENSG00000128342 | SOCS3/TNFAIP3/SLIT2/LIF | GO_BP |
| GO:0006970~response to osmotic stress | 2 | 2/43 | 83/18012 | 0.016764 | 0.064694 | 10.09358 | ENSG00000073756/ENSG00000146648 | PTGS2/EGFR | GO_BP |
| GO:0042058~regulation of epidermal growth factor receptor signaling pathway | 2 | 2/43 | 83/18012 | 0.016764 | 0.064694 | 10.09358 | ENSG00000109321/ENSG00000146648 | AREG/EGFR | GO_BP |
| GO:0051054~positive regulation of DNA metabolic process | 3 | 3/43 | 228/18012 | 0.017029 | 0.065587 | 5.511628 | ENSG00000136244/ENSG00000174775/ENSG00000146648 | IL6/HRAS/EGFR | GO_BP |
| GO:0050886~endocrine process | 2 | 2/43 | 85/18012 | 0.017534 | 0.067395 | 9.856088 | ENSG00000122641/ENSG00000104918 | INHBA/RETN | GO_BP |
| GO:0071216~cellular response to biotic stimulus | 3 | 3/43 | 231/18012 | 0.017627 | 0.067615 | 5.440048 | ENSG00000118503/ENSG00000136244/ENSG00000240972 | TNFAIP3/IL6/MIF | GO_BP |
| GO:0001942~hair follicle development | 2 | 2/43 | 86/18012 | 0.017924 | 0.068484 | 9.741482 | ENSG00000122641/ENSG00000146648 | INHBA/EGFR | GO_BP |
| GO:0045778~positive regulation of ossification | 2 | 2/43 | 86/18012 | 0.017924 | 0.068484 | 9.741482 | ENSG00000187608/ENSG00000136244 | ISG15/IL6 | GO_BP |
| GO:0051052~regulation of DNA metabolic process | 4 | 4/43 | 423/18012 | 0.017988 | 0.068591 | 3.961075 | ENSG00000168685/ENSG00000136244/ENSG00000174775/ENSG00000146648 | IL7R/IL6/HRAS/EGFR | GO_BP |
| GO:0060560~developmental growth involved in morphogenesis | 3 | 3/43 | 233/18012 | 0.018031 | 0.068619 | 5.393353 | ENSG00000145147/ENSG00000109321/ENSG00000118257 | SLIT2/AREG/NRP2 | GO_BP |
| GO:0032872~regulation of stress-activated MAPK cascade | 3 | 3/43 | 234/18012 | 0.018235 | 0.069259 | 5.370304 | ENSG00000055332/ENSG00000174775/ENSG00000146648 | EIF2AK2/HRAS/EGFR | GO_BP |
| GO:0002042~cell migration involved in sprouting angiogenesis | 2 | 2/43 | 87/18012 | 0.018319 | 0.0693 | 9.629511 | ENSG00000073756/ENSG00000145147 | PTGS2/SLIT2 | GO_BP |
| GO:0002690~positive regulation of leukocyte chemotaxis | 2 | 2/43 | 87/18012 | 0.018319 | 0.0693 | 9.629511 | ENSG00000136244/ENSG00000180871 | IL6/CXCR2 | GO_BP |
| GO:0007050~cell cycle arrest | 3 | 3/43 | 235/18012 | 0.018441 | 0.069626 | 5.347452 | ENSG00000240972/ENSG00000174775/ENSG00000122641 | MIF/HRAS/INHBA | GO_BP |
| GO:0031669~cellular response to nutrient levels | 3 | 3/43 | 236/18012 | 0.018648 | 0.069841 | 5.324793 | ENSG00000055332/ENSG00000073756/ENSG00000105835 | EIF2AK2/PTGS2/NAMPT | GO_BP |
| GO:0070302~regulation of stress-activated protein kinase signaling cascade | 3 | 3/43 | 236/18012 | 0.018648 | 0.069841 | 5.324793 | ENSG00000055332/ENSG00000174775/ENSG00000146648 | EIF2AK2/HRAS/EGFR | GO_BP |
| GO:0048568~embryonic organ development | 4 | 4/43 | 428/18012 | 0.018697 | 0.069841 | 3.914801 | ENSG00000184557/ENSG00000128342/ENSG00000146648/ENSG00000119508 | SOCS3/LIF/EGFR/NR4A3 | GO_BP |
| GO:0022404~molting cycle process | 2 | 2/43 | 88/18012 | 0.018717 | 0.069841 | 9.520085 | ENSG00000122641/ENSG00000146648 | INHBA/EGFR | GO_BP |
| GO:0022405~hair cycle process | 2 | 2/43 | 88/18012 | 0.018717 | 0.069841 | 9.520085 | ENSG00000122641/ENSG00000146648 | INHBA/EGFR | GO_BP |
| GO:0098773~skin epidermis development | 2 | 2/43 | 88/18012 | 0.018717 | 0.069841 | 9.520085 | ENSG00000122641/ENSG00000146648 | INHBA/EGFR | GO_BP |
| GO:1903321~negative regulation of protein modification by small protein conjugation or removal | 2 | 2/43 | 89/18012 | 0.019118 | 0.071201 | 9.413117 | ENSG00000187608/ENSG00000118503 | ISG15/TNFAIP3 | GO_BP |
| GO:0048732~gland development | 4 | 4/43 | 433/18012 | 0.019422 | 0.072194 | 3.869596 | ENSG00000118503/ENSG00000109321/ENSG00000146648/ENSG00000197081 | TNFAIP3/AREG/EGFR/IGF2R | GO_BP |
| GO:0001656~metanephros development | 2 | 2/43 | 90/18012 | 0.019523 | 0.072289 | 9.308527 | ENSG00000180871/ENSG00000128342 | CXCR2/LIF | GO_BP |
| GO:1901184~regulation of ERBB signaling pathway | 2 | 2/43 | 90/18012 | 0.019523 | 0.072289 | 9.308527 | ENSG00000109321/ENSG00000146648 | AREG/EGFR | GO_BP |
| GO:0050804~modulation of chemical synaptic transmission | 4 | 4/43 | 435/18012 | 0.019718 | 0.072867 | 3.851804 | ENSG00000073756/ENSG00000174775/ENSG00000104918/ENSG00000146648 | PTGS2/HRAS/RETN/EGFR | GO_BP |
| GO:0099177~regulation of trans-synaptic signaling | 4 | 4/43 | 436/18012 | 0.019866 | 0.073238 | 3.84297 | ENSG00000073756/ENSG00000174775/ENSG00000104918/ENSG00000146648 | PTGS2/HRAS/RETN/EGFR | GO_BP |
| GO:0035710~CD4-positive, alpha-beta T cell activation | 2 | 2/43 | 91/18012 | 0.019932 | 0.073238 | 9.206236 | ENSG00000144802/ENSG00000136244 | NFKBIZ/IL6 | GO_BP |
| GO:0051899~membrane depolarization | 2 | 2/43 | 91/18012 | 0.019932 | 0.073238 | 9.206236 | ENSG00000139574/ENSG00000267281 | NPFF/AC023509.3 | GO_BP |
| GO:0035249~synaptic transmission, glutamatergic | 2 | 2/43 | 92/18012 | 0.020345 | 0.074326 | 9.106168 | ENSG00000073756/ENSG00000146648 | PTGS2/EGFR | GO_BP |
| GO:0046634~regulation of alpha-beta T cell activation | 2 | 2/43 | 92/18012 | 0.020345 | 0.074326 | 9.106168 | ENSG00000144802/ENSG00000157873 | NFKBIZ/TNFRSF14 | GO_BP |
| GO:2001023~regulation of response to drug | 2 | 2/43 | 92/18012 | 0.020345 | 0.074326 | 9.106168 | ENSG00000104918/ENSG00000119508 | RETN/NR4A3 | GO_BP |
| GO:0014812~muscle cell migration | 2 | 2/43 | 93/18012 | 0.020761 | 0.075415 | 9.008252 | ENSG00000145147/ENSG00000119508 | SLIT2/NR4A3 | GO_BP |
| GO:0033273~response to vitamin | 2 | 2/43 | 93/18012 | 0.020761 | 0.075415 | 9.008252 | ENSG00000073756/ENSG00000146648 | PTGS2/EGFR | GO_BP |
| GO:0045621~positive regulation of lymphocyte differentiation | 2 | 2/43 | 93/18012 | 0.020761 | 0.075415 | 9.008252 | ENSG00000144802/ENSG00000168685 | NFKBIZ/IL7R | GO_BP |
| GO:0060337~type I interferon signaling pathway | 2 | 2/43 | 94/18012 | 0.02118 | 0.076649 | 8.91242 | ENSG00000187608/ENSG00000130303 | ISG15/BST2 | GO_BP |
| GO:0071357~cellular response to type I interferon | 2 | 2/43 | 94/18012 | 0.02118 | 0.076649 | 8.91242 | ENSG00000187608/ENSG00000130303 | ISG15/BST2 | GO_BP |
| GO:0043542~endothelial cell migration | 3 | 3/43 | 250/18012 | 0.02168 | 0.078249 | 5.026605 | ENSG00000073756/ENSG00000145147/ENSG00000118257 | PTGS2/SLIT2/NRP2 | GO_BP |
| GO:0009314~response to radiation | 4 | 4/43 | 448/18012 | 0.021704 | 0.078249 | 3.740033 | ENSG00000073756/ENSG00000174775/ENSG00000105835/ENSG00000146648 | PTGS2/HRAS/NAMPT/EGFR | GO_BP |
| GO:0002673~regulation of acute inflammatory response | 2 | 2/43 | 96/18012 | 0.02203 | 0.078538 | 8.726744 | ENSG00000073756/ENSG00000136244 | PTGS2/IL6 | GO_BP |
| GO:0019217~regulation of fatty acid metabolic process | 2 | 2/43 | 96/18012 | 0.02203 | 0.078538 | 8.726744 | ENSG00000073756/ENSG00000119508 | PTGS2/NR4A3 | GO_BP |
| GO:0090277~positive regulation of peptide hormone secretion | 2 | 2/43 | 96/18012 | 0.02203 | 0.078538 | 8.726744 | ENSG00000171560/ENSG00000146648 | FGA/EGFR | GO_BP |
| GO:1990823~response to leukemia inhibitory factor | 2 | 2/43 | 96/18012 | 0.02203 | 0.078538 | 8.726744 | ENSG00000184557/ENSG00000118257 | SOCS3/NRP2 | GO_BP |
| GO:1990830~cellular response to leukemia inhibitory factor | 2 | 2/43 | 96/18012 | 0.02203 | 0.078538 | 8.726744 | ENSG00000184557/ENSG00000118257 | SOCS3/NRP2 | GO_BP |
| GO:2001243~negative regulation of intrinsic apoptotic signaling pathway | 2 | 2/43 | 96/18012 | 0.02203 | 0.078538 | 8.726744 | ENSG00000073756/ENSG00000240972 | PTGS2/MIF | GO_BP |
| GO:0051346~negative regulation of hydrolase activity | 4 | 4/43 | 451/18012 | 0.02218 | 0.078925 | 3.715155 | ENSG00000130303/ENSG00000073756/ENSG00000174775/ENSG00000145147 | BST2/PTGS2/HRAS/SLIT2 | GO_BP |
| GO:0048863~stem cell differentiation | 3 | 3/43 | 255/18012 | 0.022825 | 0.079353 | 4.928044 | ENSG00000055332/ENSG00000128342/ENSG00000118257 | EIF2AK2/LIF/NRP2 | GO_BP |
| GO:0002824~positive regulation of adaptive immune response based on somatic recombination of immune receptors built from immunoglobulin superfamily domains | 2 | 2/43 | 98/18012 | 0.022894 | 0.079353 | 8.548647 | ENSG00000144802/ENSG00000136244 | NFKBIZ/IL6 | GO_BP |
| GO:0034340~response to type I interferon | 2 | 2/43 | 98/18012 | 0.022894 | 0.079353 | 8.548647 | ENSG00000187608/ENSG00000130303 | ISG15/BST2 | GO_BP |
| GO:0051149~positive regulation of muscle cell differentiation | 2 | 2/43 | 98/18012 | 0.022894 | 0.079353 | 8.548647 | ENSG00000101096/ENSG00000161055 | NFATC2/SCGB3A1 | GO_BP |
| GO:2000379~positive regulation of reactive oxygen species metabolic process | 2 | 2/43 | 98/18012 | 0.022894 | 0.079353 | 8.548647 | ENSG00000073756/ENSG00000146648 | PTGS2/EGFR | GO_BP |
| GO:0006874~cellular calcium ion homeostasis | 4 | 4/43 | 456/18012 | 0.022986 | 0.079353 | 3.674419 | ENSG00000163464/ENSG00000180871/ENSG00000139574/ENSG00000267281 | CXCR1/CXCR2/NPFF/AC023509.3 | GO_BP |
| GO:0006898~receptor-mediated endocytosis | 3 | 3/43 | 256/18012 | 0.023058 | 0.079353 | 4.908794 | ENSG00000163464/ENSG00000180871/ENSG00000197081 | CXCR1/CXCR2/IGF2R | GO_BP |
| GO:0000079~regulation of cyclin-dependent protein serine/threonine kinase activity | 2 | 2/43 | 99/18012 | 0.023331 | 0.079353 | 8.462297 | ENSG00000118503/ENSG00000146648 | TNFAIP3/EGFR | GO_BP |
| GO:0060191~regulation of lipase activity | 2 | 2/43 | 99/18012 | 0.023331 | 0.079353 | 8.462297 | ENSG00000174775/ENSG00000146648 | HRAS/EGFR | GO_BP |
| GO:1901570~fatty acid derivative biosynthetic process | 2 | 2/43 | 99/18012 | 0.023331 | 0.079353 | 8.462297 | ENSG00000073756/ENSG00000240972 | PTGS2/MIF | GO_BP |
| GO:0001660~fever generation | 1 | 1/43 | 10/18012 | 0.023624 | 0.079353 | 41.88837 | ENSG00000073756 | PTGS2 | GO_BP |
| GO:0010739~positive regulation of protein kinase A signaling | 1 | 1/43 | 10/18012 | 0.023624 | 0.079353 | 41.88837 | ENSG00000240972 | MIF | GO_BP |
| GO:0010749~regulation of nitric oxide mediated signal transduction | 1 | 1/43 | 10/18012 | 0.023624 | 0.079353 | 41.88837 | ENSG00000146648 | EGFR | GO_BP |
| GO:0010998~regulation of translational initiation by eIF2 alpha phosphorylation | 1 | 1/43 | 10/18012 | 0.023624 | 0.079353 | 41.88837 | ENSG00000055332 | EIF2AK2 | GO_BP |
| GO:0021562~vestibulocochlear nerve development | 1 | 1/43 | 10/18012 | 0.023624 | 0.079353 | 41.88837 | ENSG00000118257 | NRP2 | GO_BP |
| GO:0032308~positive regulation of prostaglandin secretion | 1 | 1/43 | 10/18012 | 0.023624 | 0.079353 | 41.88837 | ENSG00000240972 | MIF | GO_BP |
| GO:0034135~regulation of toll-like receptor 2 signaling pathway | 1 | 1/43 | 10/18012 | 0.023624 | 0.079353 | 41.88837 | ENSG00000118503 | TNFAIP3 | GO_BP |
| GO:0035871~protein K11-linked deubiquitination | 1 | 1/43 | 10/18012 | 0.023624 | 0.079353 | 41.88837 | ENSG00000118503 | TNFAIP3 | GO_BP |
| GO:0046642~negative regulation of alpha-beta T cell proliferation | 1 | 1/43 | 10/18012 | 0.023624 | 0.079353 | 41.88837 | ENSG00000157873 | TNFRSF14 | GO_BP |
| GO:0060600~dichotomous subdivision of an epithelial terminal unit | 1 | 1/43 | 10/18012 | 0.023624 | 0.079353 | 41.88837 | ENSG00000109321 | AREG | GO_BP |
| GO:0070091~glucagon secretion | 1 | 1/43 | 10/18012 | 0.023624 | 0.079353 | 41.88837 | ENSG00000136244 | IL6 | GO_BP |
| GO:0070099~regulation of chemokine-mediated signaling pathway | 1 | 1/43 | 10/18012 | 0.023624 | 0.079353 | 41.88837 | ENSG00000145147 | SLIT2 | GO_BP |
| GO:0090336~positive regulation of brown fat cell differentiation | 1 | 1/43 | 10/18012 | 0.023624 | 0.079353 | 41.88837 | ENSG00000073756 | PTGS2 | GO_BP |
| GO:0097050~type B pancreatic cell apoptotic process | 1 | 1/43 | 10/18012 | 0.023624 | 0.079353 | 41.88837 | ENSG00000136244 | IL6 | GO_BP |
| GO:0106049~regulation of cellular response to osmotic stress | 1 | 1/43 | 10/18012 | 0.023624 | 0.079353 | 41.88837 | ENSG00000073756 | PTGS2 | GO_BP |
| GO:1902033~regulation of hematopoietic stem cell proliferation | 1 | 1/43 | 10/18012 | 0.023624 | 0.079353 | 41.88837 | ENSG00000055332 | EIF2AK2 | GO_BP |
| GO:1903800~positive regulation of production of miRNAs involved in gene silencing by miRNA | 1 | 1/43 | 10/18012 | 0.023624 | 0.079353 | 41.88837 | ENSG00000146648 | EGFR | GO_BP |
| GO:1905522~negative regulation of macrophage migration | 1 | 1/43 | 10/18012 | 0.023624 | 0.079353 | 41.88837 | ENSG00000240972 | MIF | GO_BP |
| GO:2000253~positive regulation of feeding behavior | 1 | 1/43 | 10/18012 | 0.023624 | 0.079353 | 41.88837 | ENSG00000119508 | NR4A3 | GO_BP |
| GO:2000318~positive regulation of T-helper 17 type immune response | 1 | 1/43 | 10/18012 | 0.023624 | 0.079353 | 41.88837 | ENSG00000144802 | NFKBIZ | GO_BP |
| GO:2000628~regulation of miRNA metabolic process | 1 | 1/43 | 10/18012 | 0.023624 | 0.079353 | 41.88837 | ENSG00000174775 | HRAS | GO_BP |
| GO:2000833~positive regulation of steroid hormone secretion | 1 | 1/43 | 10/18012 | 0.023624 | 0.079353 | 41.88837 | ENSG00000104918 | RETN | GO_BP |
| GO:0046632~alpha-beta T cell differentiation | 2 | 2/43 | 100/18012 | 0.023771 | 0.079709 | 8.377674 | ENSG00000144802/ENSG00000136244 | NFKBIZ/IL6 | GO_BP |
| GO:0002027~regulation of heart rate | 2 | 2/43 | 101/18012 | 0.024215 | 0.080915 | 8.294727 | ENSG00000139574/ENSG00000267281 | NPFF/AC023509.3 | GO_BP |
| GO:0060079~excitatory postsynaptic potential | 2 | 2/43 | 101/18012 | 0.024215 | 0.080915 | 8.294727 | ENSG00000139574/ENSG00000267281 | NPFF/AC023509.3 | GO_BP |
| GO:0007631~feeding behavior | 2 | 2/43 | 102/18012 | 0.024663 | 0.08183 | 8.213406 | ENSG00000104918/ENSG00000119508 | RETN/NR4A3 | GO_BP |
| GO:0007409~axonogenesis | 4 | 4/43 | 468/18012 | 0.024995 | 0.08183 | 3.580203 | ENSG00000145147/ENSG00000197956/ENSG00000119508/ENSG00000118257 | SLIT2/S100A6/NR4A3/NRP2 | GO_BP |
| GO:0002821~positive regulation of adaptive immune response | 2 | 2/43 | 103/18012 | 0.025114 | 0.08183 | 8.133664 | ENSG00000144802/ENSG00000136244 | NFKBIZ/IL6 | GO_BP |
| GO:0007229~integrin-mediated signaling pathway | 2 | 2/43 | 103/18012 | 0.025114 | 0.08183 | 8.133664 | ENSG00000187608/ENSG00000213658 | ISG15/LAT | GO_BP |
| GO:1904029~regulation of cyclin-dependent protein kinase activity | 2 | 2/43 | 103/18012 | 0.025114 | 0.08183 | 8.133664 | ENSG00000118503/ENSG00000146648 | TNFAIP3/EGFR | GO_BP |
| GO:2001237~negative regulation of extrinsic apoptotic signaling pathway | 2 | 2/43 | 103/18012 | 0.025114 | 0.08183 | 8.133664 | ENSG00000118503/ENSG00000171560 | TNFAIP3/FGA | GO_BP |
| GO:0055074~calcium ion homeostasis | 4 | 4/43 | 469/18012 | 0.025167 | 0.08183 | 3.572569 | ENSG00000163464/ENSG00000180871/ENSG00000139574/ENSG00000267281 | CXCR1/CXCR2/NPFF/AC023509.3 | GO_BP |
| GO:0031668~cellular response to extracellular stimulus | 3 | 3/43 | 267/18012 | 0.025706 | 0.08183 | 4.706559 | ENSG00000055332/ENSG00000073756/ENSG00000105835 | EIF2AK2/PTGS2/NAMPT | GO_BP |
| GO:0002730~regulation of dendritic cell cytokine production | 1 | 1/43 | 11/18012 | 0.025956 | 0.08183 | 38.08034 | ENSG00000130303 | BST2 | GO_BP |
| GO:0019371~cyclooxygenase pathway | 1 | 1/43 | 11/18012 | 0.025956 | 0.08183 | 38.08034 | ENSG00000073756 | PTGS2 | GO_BP |
| GO:0021561~facial nerve development | 1 | 1/43 | 11/18012 | 0.025956 | 0.08183 | 38.08034 | ENSG00000118257 | NRP2 | GO_BP |
| GO:0021604~cranial nerve structural organization | 1 | 1/43 | 11/18012 | 0.025956 | 0.08183 | 38.08034 | ENSG00000118257 | NRP2 | GO_BP |
| GO:0021610~facial nerve morphogenesis | 1 | 1/43 | 11/18012 | 0.025956 | 0.08183 | 38.08034 | ENSG00000118257 | NRP2 | GO_BP |
| GO:0031652~positive regulation of heat generation | 1 | 1/43 | 11/18012 | 0.025956 | 0.08183 | 38.08034 | ENSG00000073756 | PTGS2 | GO_BP |
| GO:0031915~positive regulation of synaptic plasticity | 1 | 1/43 | 11/18012 | 0.025956 | 0.08183 | 38.08034 | ENSG00000073756 | PTGS2 | GO_BP |
| GO:0032276~regulation of gonadotropin secretion | 1 | 1/43 | 11/18012 | 0.025956 | 0.08183 | 38.08034 | ENSG00000122641 | INHBA | GO_BP |
| GO:0032306~regulation of prostaglandin secretion | 1 | 1/43 | 11/18012 | 0.025956 | 0.08183 | 38.08034 | ENSG00000240972 | MIF | GO_BP |
| GO:0032494~response to peptidoglycan | 1 | 1/43 | 11/18012 | 0.025956 | 0.08183 | 38.08034 | ENSG00000136244 | IL6 | GO_BP |
| GO:0033089~positive regulation of T cell differentiation in thymus | 1 | 1/43 | 11/18012 | 0.025956 | 0.08183 | 38.08034 | ENSG00000168685 | IL7R | GO_BP |
| GO:0036462~TRAIL-activated apoptotic signaling pathway | 1 | 1/43 | 11/18012 | 0.025956 | 0.08183 | 38.08034 | ENSG00000173535 | TNFRSF10C | GO_BP |
| GO:0043117~positive regulation of vascular permeability | 1 | 1/43 | 11/18012 | 0.025956 | 0.08183 | 38.08034 | ENSG00000180871 | CXCR2 | GO_BP |
| GO:0045835~negative regulation of meiotic nuclear division | 1 | 1/43 | 11/18012 | 0.025956 | 0.08183 | 38.08034 | ENSG00000128342 | LIF | GO_BP |
| GO:0051024~positive regulation of immunoglobulin secretion | 1 | 1/43 | 11/18012 | 0.025956 | 0.08183 | 38.08034 | ENSG00000136244 | IL6 | GO_BP |
| GO:0061042~vascular wound healing | 1 | 1/43 | 11/18012 | 0.025956 | 0.08183 | 38.08034 | ENSG00000118503 | TNFAIP3 | GO_BP |
| GO:0071372~cellular response to follicle-stimulating hormone stimulus | 1 | 1/43 | 11/18012 | 0.025956 | 0.08183 | 38.08034 | ENSG00000122641 | INHBA | GO_BP |
| GO:0072173~metanephric tubule morphogenesis | 1 | 1/43 | 11/18012 | 0.025956 | 0.08183 | 38.08034 | ENSG00000180871 | CXCR2 | GO_BP |
| GO:0072608~interleukin-10 secretion | 1 | 1/43 | 11/18012 | 0.025956 | 0.08183 | 38.08034 | ENSG00000187608 | ISG15 | GO_BP |
| GO:1902093~positive regulation of flagellated sperm motility | 1 | 1/43 | 11/18012 | 0.025956 | 0.08183 | 38.08034 | ENSG00000164825 | DEFB1 | GO_BP |
| GO:1902510~regulation of apoptotic DNA fragmentation | 1 | 1/43 | 11/18012 | 0.025956 | 0.08183 | 38.08034 | ENSG00000136244 | IL6 | GO_BP |
| GO:1905941~positive regulation of gonad development | 1 | 1/43 | 11/18012 | 0.025956 | 0.08183 | 38.08034 | ENSG00000104918 | RETN | GO_BP |
| GO:2000252~negative regulation of feeding behavior | 1 | 1/43 | 11/18012 | 0.025956 | 0.08183 | 38.08034 | ENSG00000104918 | RETN | GO_BP |
| GO:2000551~regulation of T-helper 2 cell cytokine production | 1 | 1/43 | 11/18012 | 0.025956 | 0.08183 | 38.08034 | ENSG00000136244 | IL6 | GO_BP |
| GO:2001241~positive regulation of extrinsic apoptotic signaling pathway in absence of ligand | 1 | 1/43 | 11/18012 | 0.025956 | 0.08183 | 38.08034 | ENSG00000122641 | INHBA | GO_BP |
| GO:0002286~T cell activation involved in immune response | 2 | 2/43 | 105/18012 | 0.026025 | 0.08183 | 7.978738 | ENSG00000144802/ENSG00000136244 | NFKBIZ/IL6 | GO_BP |
| GO:0002456~T cell mediated immunity | 2 | 2/43 | 105/18012 | 0.026025 | 0.08183 | 7.978738 | ENSG00000168685/ENSG00000136244 | IL7R/IL6 | GO_BP |
| GO:0007218~neuropeptide signaling pathway | 2 | 2/43 | 105/18012 | 0.026025 | 0.08183 | 7.978738 | ENSG00000139574/ENSG00000267281 | NPFF/AC023509.3 | GO_BP |
| GO:0010632~regulation of epithelial cell migration | 3 | 3/43 | 269/18012 | 0.026205 | 0.08226 | 4.671566 | ENSG00000073756/ENSG00000145147/ENSG00000118257 | PTGS2/SLIT2/NRP2 | GO_BP |
| GO:0007548~sex differentiation | 3 | 3/43 | 270/18012 | 0.026456 | 0.082913 | 4.654264 | ENSG00000145147/ENSG00000122641/ENSG00000104918 | SLIT2/INHBA/RETN | GO_BP |
| GO:0001938~positive regulation of endothelial cell proliferation | 2 | 2/43 | 107/18012 | 0.02695 | 0.08405 | 7.829602 | ENSG00000106178/ENSG00000118257 | CCL24/NRP2 | GO_BP |
| GO:0002377~immunoglobulin production | 2 | 2/43 | 107/18012 | 0.02695 | 0.08405 | 7.829602 | ENSG00000168685/ENSG00000136244 | IL7R/IL6 | GO_BP |
| GO:0021510~spinal cord development | 2 | 2/43 | 107/18012 | 0.02695 | 0.08405 | 7.829602 | ENSG00000139574/ENSG00000267281 | NPFF/AC023509.3 | GO_BP |
| GO:0006275~regulation of DNA replication | 2 | 2/43 | 108/18012 | 0.027418 | 0.085026 | 7.757106 | ENSG00000174775/ENSG00000146648 | HRAS/EGFR | GO_BP |
| GO:0014902~myotube differentiation | 2 | 2/43 | 109/18012 | 0.027889 | 0.085026 | 7.68594 | ENSG00000101096/ENSG00000161055 | NFATC2/SCGB3A1 | GO_BP |
| GO:0033559~unsaturated fatty acid metabolic process | 2 | 2/43 | 109/18012 | 0.027889 | 0.085026 | 7.68594 | ENSG00000073756/ENSG00000240972 | PTGS2/MIF | GO_BP |
| GO:0072676~lymphocyte migration | 2 | 2/43 | 109/18012 | 0.027889 | 0.085026 | 7.68594 | ENSG00000106178/ENSG00000157873 | CCL24/TNFRSF14 | GO_BP |
| GO:0099565~chemical synaptic transmission, postsynaptic | 2 | 2/43 | 109/18012 | 0.027889 | 0.085026 | 7.68594 | ENSG00000139574/ENSG00000267281 | NPFF/AC023509.3 | GO_BP |
| GO:0007411~axon guidance | 3 | 3/43 | 276/18012 | 0.027991 | 0.085026 | 4.553084 | ENSG00000145147/ENSG00000119508/ENSG00000118257 | SLIT2/NR4A3/NRP2 | GO_BP |
| GO:0097485~neuron projection guidance | 3 | 3/43 | 277/18012 | 0.028251 | 0.085026 | 4.536647 | ENSG00000145147/ENSG00000119508/ENSG00000118257 | SLIT2/NR4A3/NRP2 | GO_BP |
| GO:0002371~dendritic cell cytokine production | 1 | 1/43 | 12/18012 | 0.028283 | 0.085026 | 34.90698 | ENSG00000130303 | BST2 | GO_BP |
| GO:0002903~negative regulation of B cell apoptotic process | 1 | 1/43 | 12/18012 | 0.028283 | 0.085026 | 34.90698 | ENSG00000240972 | MIF | GO_BP |
| GO:0003337~mesenchymal to epithelial transition involved in metanephros morphogenesis | 1 | 1/43 | 12/18012 | 0.028283 | 0.085026 | 34.90698 | ENSG00000128342 | LIF | GO_BP |
| GO:0010838~positive regulation of keratinocyte proliferation | 1 | 1/43 | 12/18012 | 0.028283 | 0.085026 | 34.90698 | ENSG00000109321 | AREG | GO_BP |
| GO:0010960~magnesium ion homeostasis | 1 | 1/43 | 12/18012 | 0.028283 | 0.085026 | 34.90698 | ENSG00000146648 | EGFR | GO_BP |
| GO:0021889~olfactory bulb interneuron differentiation | 1 | 1/43 | 12/18012 | 0.028283 | 0.085026 | 34.90698 | ENSG00000145147 | SLIT2 | GO_BP |
| GO:0031392~regulation of prostaglandin biosynthetic process | 1 | 1/43 | 12/18012 | 0.028283 | 0.085026 | 34.90698 | ENSG00000073756 | PTGS2 | GO_BP |
| GO:0032429~regulation of phospholipase A2 activity | 1 | 1/43 | 12/18012 | 0.028283 | 0.085026 | 34.90698 | ENSG00000146648 | EGFR | GO_BP |
| GO:0032966~negative regulation of collagen biosynthetic process | 1 | 1/43 | 12/18012 | 0.028283 | 0.085026 | 34.90698 | ENSG00000136244 | IL6 | GO_BP |
| GO:0033689~negative regulation of osteoblast proliferation | 1 | 1/43 | 12/18012 | 0.028283 | 0.085026 | 34.90698 | ENSG00000055332 | EIF2AK2 | GO_BP |
| GO:0042532~negative regulation of tyrosine phosphorylation of STAT protein | 1 | 1/43 | 12/18012 | 0.028283 | 0.085026 | 34.90698 | ENSG00000184557 | SOCS3 | GO_BP |
| GO:0048711~positive regulation of astrocyte differentiation | 1 | 1/43 | 12/18012 | 0.028283 | 0.085026 | 34.90698 | ENSG00000128342 | LIF | GO_BP |
| GO:0060670~branching involved in labyrinthine layer morphogenesis | 1 | 1/43 | 12/18012 | 0.028283 | 0.085026 | 34.90698 | ENSG00000184557 | SOCS3 | GO_BP |
| GO:0070486~leukocyte aggregation | 1 | 1/43 | 12/18012 | 0.028283 | 0.085026 | 34.90698 | ENSG00000119508 | NR4A3 | GO_BP |
| GO:0072540~T-helper 17 cell lineage commitment | 1 | 1/43 | 12/18012 | 0.028283 | 0.085026 | 34.90698 | ENSG00000136244 | IL6 | GO_BP |
| GO:2000341~regulation of chemokine (C-X-C motif) ligand 2 production | 1 | 1/43 | 12/18012 | 0.028283 | 0.085026 | 34.90698 | ENSG00000240972 | MIF | GO_BP |
| GO:0021761~limbic system development | 2 | 2/43 | 110/18012 | 0.028363 | 0.085132 | 7.616068 | ENSG00000119508/ENSG00000118257 | NR4A3/NRP2 | GO_BP |
| GO:0001822~kidney development | 3 | 3/43 | 278/18012 | 0.028512 | 0.085448 | 4.520328 | ENSG00000145147/ENSG00000180871/ENSG00000128342 | SLIT2/CXCR2/LIF | GO_BP |
| GO:0051258~protein polymerization | 3 | 3/43 | 279/18012 | 0.028775 | 0.085893 | 4.504126 | ENSG00000171560/ENSG00000106178/ENSG00000145147 | FGA/CCL24/SLIT2 | GO_BP |
| GO:0031623~receptor internalization | 2 | 2/43 | 111/18012 | 0.02884 | 0.085893 | 7.547454 | ENSG00000163464/ENSG00000180871 | CXCR1/CXCR2 | GO_BP |
| GO:0051153~regulation of striated muscle cell differentiation | 2 | 2/43 | 111/18012 | 0.02884 | 0.085893 | 7.547454 | ENSG00000101096/ENSG00000161055 | NFATC2/SCGB3A1 | GO_BP |
| GO:0051817~modification of morphology or physiology of other organism involved in symbiotic interaction | 2 | 2/43 | 111/18012 | 0.02884 | 0.085893 | 7.547454 | ENSG00000055332/ENSG00000197081 | EIF2AK2/IGF2R | GO_BP |
| GO:0072503~cellular divalent inorganic cation homeostasis | 4 | 4/43 | 490/18012 | 0.028948 | 0.08608 | 3.419459 | ENSG00000163464/ENSG00000180871/ENSG00000139574/ENSG00000267281 | CXCR1/CXCR2/NPFF/AC023509.3 | GO_BP |
| GO:0003279~cardiac septum development | 2 | 2/43 | 112/18012 | 0.02932 | 0.086919 | 7.480066 | ENSG00000145147/ENSG00000118257 | SLIT2/NRP2 | GO_BP |
| GO:1901222~regulation of NIK/NF-kappaB signaling | 2 | 2/43 | 112/18012 | 0.02932 | 0.086919 | 7.480066 | ENSG00000055332/ENSG00000146648 | EIF2AK2/EGFR | GO_BP |
| GO:0030282~bone mineralization | 2 | 2/43 | 113/18012 | 0.029804 | 0.08709 | 7.413871 | ENSG00000187608/ENSG00000073756 | ISG15/PTGS2 | GO_BP |
| GO:0042035~regulation of cytokine biosynthetic process | 2 | 2/43 | 113/18012 | 0.029804 | 0.08709 | 7.413871 | ENSG00000136244/ENSG00000122641 | IL6/INHBA | GO_BP |
| GO:0051403~stress-activated MAPK cascade | 3 | 3/43 | 284/18012 | 0.030109 | 0.08709 | 4.424828 | ENSG00000055332/ENSG00000174775/ENSG00000146648 | EIF2AK2/HRAS/EGFR | GO_BP |
| GO:0006690~icosanoid metabolic process | 2 | 2/43 | 114/18012 | 0.030291 | 0.08709 | 7.348837 | ENSG00000073756/ENSG00000240972 | PTGS2/MIF | GO_BP |
| GO:0030218~erythrocyte differentiation | 2 | 2/43 | 114/18012 | 0.030291 | 0.08709 | 7.348837 | ENSG00000187608/ENSG00000122641 | ISG15/INHBA | GO_BP |
| GO:0043279~response to alkaloid | 2 | 2/43 | 114/18012 | 0.030291 | 0.08709 | 7.348837 | ENSG00000139574/ENSG00000267281 | NPFF/AC023509.3 | GO_BP |
| GO:1904375~regulation of protein localization to cell periphery | 2 | 2/43 | 114/18012 | 0.030291 | 0.08709 | 7.348837 | ENSG00000174775/ENSG00000146648 | HRAS/EGFR | GO_BP |
| GO:0007494~midgut development | 1 | 1/43 | 13/18012 | 0.030604 | 0.08709 | 32.22182 | ENSG00000146648 | EGFR | GO_BP |
| GO:0010713~negative regulation of collagen metabolic process | 1 | 1/43 | 13/18012 | 0.030604 | 0.08709 | 32.22182 | ENSG00000136244 | IL6 | GO_BP |
| GO:0031650~regulation of heat generation | 1 | 1/43 | 13/18012 | 0.030604 | 0.08709 | 32.22182 | ENSG00000073756 | PTGS2 | GO_BP |
| GO:0031665~negative regulation of lipopolysaccharide-mediated signaling pathway | 1 | 1/43 | 13/18012 | 0.030604 | 0.08709 | 32.22182 | ENSG00000118503 | TNFAIP3 | GO_BP |
| GO:0035745~T-helper 2 cell cytokine production | 1 | 1/43 | 13/18012 | 0.030604 | 0.08709 | 32.22182 | ENSG00000136244 | IL6 | GO_BP |
| GO:0043116~negative regulation of vascular permeability | 1 | 1/43 | 13/18012 | 0.030604 | 0.08709 | 32.22182 | ENSG00000145147 | SLIT2 | GO_BP |
| GO:0047484~regulation of response to osmotic stress | 1 | 1/43 | 13/18012 | 0.030604 | 0.08709 | 32.22182 | ENSG00000073756 | PTGS2 | GO_BP |
| GO:0050713~negative regulation of interleukin-1 beta secretion | 1 | 1/43 | 13/18012 | 0.030604 | 0.08709 | 32.22182 | ENSG00000118503 | TNFAIP3 | GO_BP |
| GO:0061469~regulation of type B pancreatic cell proliferation | 1 | 1/43 | 13/18012 | 0.030604 | 0.08709 | 32.22182 | ENSG00000119508 | NR4A3 | GO_BP |
| GO:0070431~nucleotide-binding oligomerization domain containing 2 signaling pathway | 1 | 1/43 | 13/18012 | 0.030604 | 0.08709 | 32.22182 | ENSG00000118503 | TNFAIP3 | GO_BP |
| GO:0072182~regulation of nephron tubule epithelial cell differentiation | 1 | 1/43 | 13/18012 | 0.030604 | 0.08709 | 32.22182 | ENSG00000128342 | LIF | GO_BP |
| GO:0090713~immunological memory process | 1 | 1/43 | 13/18012 | 0.030604 | 0.08709 | 32.22182 | ENSG00000157873 | TNFRSF14 | GO_BP |
| GO:0099633~protein localization to postsynaptic specialization membrane | 1 | 1/43 | 13/18012 | 0.030604 | 0.08709 | 32.22182 | ENSG00000174775 | HRAS | GO_BP |
| GO:0099645~neurotransmitter receptor localization to postsynaptic specialization membrane | 1 | 1/43 | 13/18012 | 0.030604 | 0.08709 | 32.22182 | ENSG00000174775 | HRAS | GO_BP |
| GO:1900225~regulation of NLRP3 inflammasome complex assembly | 1 | 1/43 | 13/18012 | 0.030604 | 0.08709 | 32.22182 | ENSG00000055332 | EIF2AK2 | GO_BP |
| GO:1902285~semaphorin-plexin signaling pathway involved in neuron projection guidance | 1 | 1/43 | 13/18012 | 0.030604 | 0.08709 | 32.22182 | ENSG00000118257 | NRP2 | GO_BP |
| GO:1903025~regulation of RNA polymerase II regulatory region sequence-specific DNA binding | 1 | 1/43 | 13/18012 | 0.030604 | 0.08709 | 32.22182 | ENSG00000128342 | LIF | GO_BP |
| GO:1903624~regulation of DNA catabolic process | 1 | 1/43 | 13/18012 | 0.030604 | 0.08709 | 32.22182 | ENSG00000136244 | IL6 | GO_BP |
| GO:1905064~negative regulation of vascular smooth muscle cell differentiation | 1 | 1/43 | 13/18012 | 0.030604 | 0.08709 | 32.22182 | ENSG00000101096 | NFATC2 | GO_BP |
| GO:2000194~regulation of female gonad development | 1 | 1/43 | 13/18012 | 0.030604 | 0.08709 | 32.22182 | ENSG00000104918 | RETN | GO_BP |
| GO:0071356~cellular response to tumor necrosis factor | 3 | 3/43 | 286/18012 | 0.030652 | 0.087097 | 4.393885 | ENSG00000118503/ENSG00000106178/ENSG00000157873 | TNFAIP3/CCL24/TNFRSF14 | GO_BP |
| GO:0021782~glial cell development | 2 | 2/43 | 115/18012 | 0.030781 | 0.087335 | 7.284934 | ENSG00000136244/ENSG00000146648 | IL6/EGFR | GO_BP |
| GO:0097193~intrinsic apoptotic signaling pathway | 3 | 3/43 | 287/18012 | 0.030925 | 0.087614 | 4.378575 | ENSG00000073756/ENSG00000240972/ENSG00000174775 | PTGS2/MIF/HRAS | GO_BP |
| GO:0002761~regulation of myeloid leukocyte differentiation | 2 | 2/43 | 116/18012 | 0.031275 | 0.088343 | 7.222133 | ENSG00000122641/ENSG00000128342 | INHBA/LIF | GO_BP |
| GO:0007173~epidermal growth factor receptor signaling pathway | 2 | 2/43 | 116/18012 | 0.031275 | 0.088343 | 7.222133 | ENSG00000109321/ENSG00000146648 | AREG/EGFR | GO_BP |
| GO:1900180~regulation of protein localization to nucleus | 2 | 2/43 | 117/18012 | 0.031771 | 0.089613 | 7.160405 | ENSG00000073756/ENSG00000128342 | PTGS2/LIF | GO_BP |
| GO:0045667~regulation of osteoblast differentiation | 2 | 2/43 | 118/18012 | 0.032271 | 0.090889 | 7.099724 | ENSG00000136244/ENSG00000109321 | IL6/AREG | GO_BP |
| GO:0009410~response to xenobiotic stimulus | 3 | 3/43 | 293/18012 | 0.032592 | 0.091112 | 4.288912 | ENSG00000139574/ENSG00000267281/ENSG00000146648 | NPFF/AC023509.3/EGFR | GO_BP |
| GO:0072001~renal system development | 3 | 3/43 | 293/18012 | 0.032592 | 0.091112 | 4.288912 | ENSG00000145147/ENSG00000180871/ENSG00000128342 | SLIT2/CXCR2/LIF | GO_BP |
| GO:0020027~hemoglobin metabolic process | 1 | 1/43 | 14/18012 | 0.03292 | 0.091112 | 29.92027 | ENSG00000122641 | INHBA | GO_BP |
| GO:0032310~prostaglandin secretion | 1 | 1/43 | 14/18012 | 0.03292 | 0.091112 | 29.92027 | ENSG00000240972 | MIF | GO_BP |
| GO:0043558~regulation of translational initiation in response to stress | 1 | 1/43 | 14/18012 | 0.03292 | 0.091112 | 29.92027 | ENSG00000055332 | EIF2AK2 | GO_BP |
| GO:0044546~NLRP3 inflammasome complex assembly | 1 | 1/43 | 14/18012 | 0.03292 | 0.091112 | 29.92027 | ENSG00000055332 | EIF2AK2 | GO_BP |
| GO:0045651~positive regulation of macrophage differentiation | 1 | 1/43 | 14/18012 | 0.03292 | 0.091112 | 29.92027 | ENSG00000128342 | LIF | GO_BP |
| GO:0072216~positive regulation of metanephros development | 1 | 1/43 | 14/18012 | 0.03292 | 0.091112 | 29.92027 | ENSG00000128342 | LIF | GO_BP |
| GO:0072567~chemokine (C-X-C motif) ligand 2 production | 1 | 1/43 | 14/18012 | 0.03292 | 0.091112 | 29.92027 | ENSG00000240972 | MIF | GO_BP |
| GO:0097154~GABAergic neuron differentiation | 1 | 1/43 | 14/18012 | 0.03292 | 0.091112 | 29.92027 | ENSG00000122641 | INHBA | GO_BP |
| GO:2000345~regulation of hepatocyte proliferation | 1 | 1/43 | 14/18012 | 0.03292 | 0.091112 | 29.92027 | ENSG00000118503 | TNFAIP3 | GO_BP |
| GO:2001279~regulation of unsaturated fatty acid biosynthetic process | 1 | 1/43 | 14/18012 | 0.03292 | 0.091112 | 29.92027 | ENSG00000073756 | PTGS2 | GO_BP |
| GO:0001704~formation of primary germ layer | 2 | 2/43 | 120/18012 | 0.033279 | 0.091709 | 6.981395 | ENSG00000122641/ENSG00000119508 | INHBA/NR4A3 | GO_BP |
| GO:0002698~negative regulation of immune effector process | 2 | 2/43 | 120/18012 | 0.033279 | 0.091709 | 6.981395 | ENSG00000130303/ENSG00000168685 | BST2/IL7R | GO_BP |
| GO:0010595~positive regulation of endothelial cell migration | 2 | 2/43 | 120/18012 | 0.033279 | 0.091709 | 6.981395 | ENSG00000073756/ENSG00000118257 | PTGS2/NRP2 | GO_BP |
| GO:0032368~regulation of lipid transport | 2 | 2/43 | 121/18012 | 0.033788 | 0.092579 | 6.923698 | ENSG00000240972/ENSG00000104918 | MIF/RETN | GO_BP |
| GO:0046718~viral entry into host cell | 2 | 2/43 | 121/18012 | 0.033788 | 0.092579 | 6.923698 | ENSG00000146648/ENSG00000157873 | EGFR/TNFRSF14 | GO_BP |
| GO:0048675~axon extension | 2 | 2/43 | 121/18012 | 0.033788 | 0.092579 | 6.923698 | ENSG00000145147/ENSG00000118257 | SLIT2/NRP2 | GO_BP |
| GO:1905477~positive regulation of protein localization to membrane | 2 | 2/43 | 121/18012 | 0.033788 | 0.092579 | 6.923698 | ENSG00000174775/ENSG00000146648 | HRAS/EGFR | GO_BP |
| GO:0014013~regulation of gliogenesis | 2 | 2/43 | 122/18012 | 0.0343 | 0.093448 | 6.866946 | ENSG00000136244/ENSG00000128342 | IL6/LIF | GO_BP |
| GO:0014066~regulation of phosphatidylinositol 3-kinase signaling | 2 | 2/43 | 122/18012 | 0.0343 | 0.093448 | 6.866946 | ENSG00000146648/ENSG00000187266 | EGFR/EPOR | GO_BP |
| GO:0034101~erythrocyte homeostasis | 2 | 2/43 | 122/18012 | 0.0343 | 0.093448 | 6.866946 | ENSG00000187608/ENSG00000122641 | ISG15/INHBA | GO_BP |
| GO:0042089~cytokine biosynthetic process | 2 | 2/43 | 122/18012 | 0.0343 | 0.093448 | 6.866946 | ENSG00000136244/ENSG00000122641 | IL6/INHBA | GO_BP |
| GO:0042107~cytokine metabolic process | 2 | 2/43 | 123/18012 | 0.034815 | 0.094112 | 6.811117 | ENSG00000136244/ENSG00000122641 | IL6/INHBA | GO_BP |
| GO:0030336~negative regulation of cell migration | 3 | 3/43 | 302/18012 | 0.03518 | 0.094112 | 4.161097 | ENSG00000130303/ENSG00000240972/ENSG00000145147 | BST2/MIF/SLIT2 | GO_BP |
| GO:0002467~germinal center formation | 1 | 1/43 | 15/18012 | 0.035231 | 0.094112 | 27.92558 | ENSG00000118503 | TNFAIP3 | GO_BP |
| GO:0032274~gonadotropin secretion | 1 | 1/43 | 15/18012 | 0.035231 | 0.094112 | 27.92558 | ENSG00000122641 | INHBA | GO_BP |
| GO:0034134~toll-like receptor 2 signaling pathway | 1 | 1/43 | 15/18012 | 0.035231 | 0.094112 | 27.92558 | ENSG00000118503 | TNFAIP3 | GO_BP |
| GO:0043518~negative regulation of DNA damage response, signal transduction by p53 class mediator | 1 | 1/43 | 15/18012 | 0.035231 | 0.094112 | 27.92558 | ENSG00000240972 | MIF | GO_BP |
| GO:0044794~positive regulation by host of viral process | 1 | 1/43 | 15/18012 | 0.035231 | 0.094112 | 27.92558 | ENSG00000197081 | IGF2R | GO_BP |
| GO:0045073~regulation of chemokine biosynthetic process | 1 | 1/43 | 15/18012 | 0.035231 | 0.094112 | 27.92558 | ENSG00000136244 | IL6 | GO_BP |
| GO:0046321~positive regulation of fatty acid oxidation | 1 | 1/43 | 15/18012 | 0.035231 | 0.094112 | 27.92558 | ENSG00000119508 | NR4A3 | GO_BP |
| GO:0051770~positive regulation of nitric-oxide synthase biosynthetic process | 1 | 1/43 | 15/18012 | 0.035231 | 0.094112 | 27.92558 | ENSG00000105835 | NAMPT | GO_BP |
| GO:0072160~nephron tubule epithelial cell differentiation | 1 | 1/43 | 15/18012 | 0.035231 | 0.094112 | 27.92558 | ENSG00000128342 | LIF | GO_BP |
| GO:0072283~metanephric renal vesicle morphogenesis | 1 | 1/43 | 15/18012 | 0.035231 | 0.094112 | 27.92558 | ENSG00000128342 | LIF | GO_BP |
| GO:1900029~positive regulation of ruffle assembly | 1 | 1/43 | 15/18012 | 0.035231 | 0.094112 | 27.92558 | ENSG00000174775 | HRAS | GO_BP |
| GO:1900119~positive regulation of execution phase of apoptosis | 1 | 1/43 | 15/18012 | 0.035231 | 0.094112 | 27.92558 | ENSG00000136244 | IL6 | GO_BP |
| GO:0032479~regulation of type I interferon production | 2 | 2/43 | 125/18012 | 0.035854 | 0.095644 | 6.70214 | ENSG00000187608/ENSG00000118503 | ISG15/TNFAIP3 | GO_BP |
| GO:0032606~type I interferon production | 2 | 2/43 | 127/18012 | 0.036905 | 0.097026 | 6.596594 | ENSG00000187608/ENSG00000118503 | ISG15/TNFAIP3 | GO_BP |
| GO:0003206~cardiac chamber morphogenesis | 2 | 2/43 | 128/18012 | 0.037435 | 0.097026 | 6.545058 | ENSG00000145147/ENSG00000118257 | SLIT2/NRP2 | GO_BP |
| GO:0002295~T-helper cell lineage commitment | 1 | 1/43 | 16/18012 | 0.037536 | 0.097026 | 26.18023 | ENSG00000136244 | IL6 | GO_BP |
| GO:0002739~regulation of cytokine secretion involved in immune response | 1 | 1/43 | 16/18012 | 0.037536 | 0.097026 | 26.18023 | ENSG00000157873 | TNFRSF14 | GO_BP |
| GO:0002830~positive regulation of type 2 immune response | 1 | 1/43 | 16/18012 | 0.037536 | 0.097026 | 26.18023 | ENSG00000136244 | IL6 | GO_BP |
| GO:0010663~positive regulation of striated muscle cell apoptotic process | 1 | 1/43 | 16/18012 | 0.037536 | 0.097026 | 26.18023 | ENSG00000180871 | CXCR2 | GO_BP |
| GO:0010666~positive regulation of cardiac muscle cell apoptotic process | 1 | 1/43 | 16/18012 | 0.037536 | 0.097026 | 26.18023 | ENSG00000180871 | CXCR2 | GO_BP |
| GO:0019372~lipoxygenase pathway | 1 | 1/43 | 16/18012 | 0.037536 | 0.097026 | 26.18023 | ENSG00000073756 | PTGS2 | GO_BP |
| GO:0032225~regulation of synaptic transmission, dopaminergic | 1 | 1/43 | 16/18012 | 0.037536 | 0.097026 | 26.18023 | ENSG00000073756 | PTGS2 | GO_BP |
| GO:0032305~positive regulation of icosanoid secretion | 1 | 1/43 | 16/18012 | 0.037536 | 0.097026 | 26.18023 | ENSG00000240972 | MIF | GO_BP |
| GO:0032354~response to follicle-stimulating hormone | 1 | 1/43 | 16/18012 | 0.037536 | 0.097026 | 26.18023 | ENSG00000122641 | INHBA | GO_BP |
| GO:0034116~positive regulation of heterotypic cell-cell adhesion | 1 | 1/43 | 16/18012 | 0.037536 | 0.097026 | 26.18023 | ENSG00000171560 | FGA | GO_BP |
| GO:0042033~chemokine biosynthetic process | 1 | 1/43 | 16/18012 | 0.037536 | 0.097026 | 26.18023 | ENSG00000136244 | IL6 | GO_BP |
| GO:0045986~negative regulation of smooth muscle contraction | 1 | 1/43 | 16/18012 | 0.037536 | 0.097026 | 26.18023 | ENSG00000073756 | PTGS2 | GO_BP |
| GO:0050711~negative regulation of interleukin-1 secretion | 1 | 1/43 | 16/18012 | 0.037536 | 0.097026 | 26.18023 | ENSG00000118503 | TNFAIP3 | GO_BP |
| GO:0050755~chemokine metabolic process | 1 | 1/43 | 16/18012 | 0.037536 | 0.097026 | 26.18023 | ENSG00000136244 | IL6 | GO_BP |
| GO:0051447~negative regulation of meiotic cell cycle | 1 | 1/43 | 16/18012 | 0.037536 | 0.097026 | 26.18023 | ENSG00000128342 | LIF | GO_BP |
| GO:0061548~ganglion development | 1 | 1/43 | 16/18012 | 0.037536 | 0.097026 | 26.18023 | ENSG00000118257 | NRP2 | GO_BP |
| GO:0090335~regulation of brown fat cell differentiation | 1 | 1/43 | 16/18012 | 0.037536 | 0.097026 | 26.18023 | ENSG00000073756 | PTGS2 | GO_BP |
| GO:1901032~negative regulation of response to reactive oxygen species | 1 | 1/43 | 16/18012 | 0.037536 | 0.097026 | 26.18023 | ENSG00000119508 | NR4A3 | GO_BP |
| GO:1902166~negative regulation of intrinsic apoptotic signaling pathway in response to DNA damage by p53 class mediator | 1 | 1/43 | 16/18012 | 0.037536 | 0.097026 | 26.18023 | ENSG00000240972 | MIF | GO_BP |
| GO:1903206~negative regulation of hydrogen peroxide-induced cell death | 1 | 1/43 | 16/18012 | 0.037536 | 0.097026 | 26.18023 | ENSG00000119508 | NR4A3 | GO_BP |
| GO:2001039~negative regulation of cellular response to drug | 1 | 1/43 | 16/18012 | 0.037536 | 0.097026 | 26.18023 | ENSG00000119508 | NR4A3 | GO_BP |
| GO:0045598~regulation of fat cell differentiation | 2 | 2/43 | 129/18012 | 0.037968 | 0.098012 | 6.494321 | ENSG00000073756/ENSG00000136244 | PTGS2/IL6 | GO_BP |
| GO:0031098~stress-activated protein kinase signaling cascade | 3 | 3/43 | 313/18012 | 0.038484 | 0.09921 | 4.01486 | ENSG00000055332/ENSG00000174775/ENSG00000146648 | EIF2AK2/HRAS/EGFR | GO_BP |
| GO:2000146~negative regulation of cell motility | 3 | 3/43 | 317/18012 | 0.039724 | 0.100665 | 3.964199 | ENSG00000130303/ENSG00000240972/ENSG00000145147 | BST2/MIF/SLIT2 | GO_BP |
| GO:0003184~pulmonary valve morphogenesis | 1 | 1/43 | 17/18012 | 0.039835 | 0.100665 | 24.64022 | ENSG00000145147 | SLIT2 | GO_BP |
| GO:0010715~regulation of extracellular matrix disassembly | 1 | 1/43 | 17/18012 | 0.039835 | 0.100665 | 24.64022 | ENSG00000136244 | IL6 | GO_BP |
| GO:0015732~prostaglandin transport | 1 | 1/43 | 17/18012 | 0.039835 | 0.100665 | 24.64022 | ENSG00000240972 | MIF | GO_BP |
| GO:0021783~preganglionic parasympathetic fiber development | 1 | 1/43 | 17/18012 | 0.039835 | 0.100665 | 24.64022 | ENSG00000118257 | NRP2 | GO_BP |
| GO:0031649~heat generation | 1 | 1/43 | 17/18012 | 0.039835 | 0.100665 | 24.64022 | ENSG00000073756 | PTGS2 | GO_BP |
| GO:0032740~positive regulation of interleukin-17 production | 1 | 1/43 | 17/18012 | 0.039835 | 0.100665 | 24.64022 | ENSG00000136244 | IL6 | GO_BP |
| GO:0043373~CD4-positive, alpha-beta T cell lineage commitment | 1 | 1/43 | 17/18012 | 0.039835 | 0.100665 | 24.64022 | ENSG00000136244 | IL6 | GO_BP |
| GO:0045072~regulation of interferon-gamma biosynthetic process | 1 | 1/43 | 17/18012 | 0.039835 | 0.100665 | 24.64022 | ENSG00000122641 | INHBA | GO_BP |
| GO:0048532~anatomical structure arrangement | 1 | 1/43 | 17/18012 | 0.039835 | 0.100665 | 24.64022 | ENSG00000118257 | NRP2 | GO_BP |
| GO:0048535~lymph node development | 1 | 1/43 | 17/18012 | 0.039835 | 0.100665 | 24.64022 | ENSG00000168685 | IL7R | GO_BP |
| GO:0150078~positive regulation of neuroinflammatory response | 1 | 1/43 | 17/18012 | 0.039835 | 0.100665 | 24.64022 | ENSG00000136244 | IL6 | GO_BP |
| GO:1901317~regulation of flagellated sperm motility | 1 | 1/43 | 17/18012 | 0.039835 | 0.100665 | 24.64022 | ENSG00000164825 | DEFB1 | GO_BP |
| GO:1902683~regulation of receptor localization to synapse | 1 | 1/43 | 17/18012 | 0.039835 | 0.100665 | 24.64022 | ENSG00000174775 | HRAS | GO_BP |
| GO:2000319~regulation of T-helper 17 cell differentiation | 1 | 1/43 | 17/18012 | 0.039835 | 0.100665 | 24.64022 | ENSG00000144802 | NFKBIZ | GO_BP |
| GO:0046683~response to organophosphorus | 2 | 2/43 | 133/18012 | 0.040129 | 0.101273 | 6.299003 | ENSG00000073756/ENSG00000109321 | PTGS2/AREG | GO_BP |
| GO:0007498~mesoderm development | 2 | 2/43 | 134/18012 | 0.040677 | 0.101984 | 6.251996 | ENSG00000122641/ENSG00000119508 | INHBA/NR4A3 | GO_BP |
| GO:0030260~entry into host cell | 2 | 2/43 | 134/18012 | 0.040677 | 0.101984 | 6.251996 | ENSG00000146648/ENSG00000157873 | EGFR/TNFRSF14 | GO_BP |
| GO:0044409~entry into host | 2 | 2/43 | 134/18012 | 0.040677 | 0.101984 | 6.251996 | ENSG00000146648/ENSG00000157873 | EGFR/TNFRSF14 | GO_BP |
| GO:0051806~entry into cell of other organism involved in symbiotic interaction | 2 | 2/43 | 134/18012 | 0.040677 | 0.101984 | 6.251996 | ENSG00000146648/ENSG00000157873 | EGFR/TNFRSF14 | GO_BP |
| GO:0051828~entry into other organism involved in symbiotic interaction | 2 | 2/43 | 134/18012 | 0.040677 | 0.101984 | 6.251996 | ENSG00000146648/ENSG00000157873 | EGFR/TNFRSF14 | GO_BP |
| GO:0060562~epithelial tube morphogenesis | 3 | 3/43 | 321/18012 | 0.040984 | 0.102545 | 3.914801 | ENSG00000145147/ENSG00000180871/ENSG00000109321 | SLIT2/CXCR2/AREG | GO_BP |
| GO:0007292~female gamete generation | 2 | 2/43 | 136/18012 | 0.04178 | 0.102545 | 6.160055 | ENSG00000073756/ENSG00000122641 | PTGS2/INHBA | GO_BP |
| GO:0060359~response to ammonium ion | 2 | 2/43 | 136/18012 | 0.04178 | 0.102545 | 6.160055 | ENSG00000139574/ENSG00000267281 | NPFF/AC023509.3 | GO_BP |
| GO:0001911~negative regulation of leukocyte mediated cytotoxicity | 1 | 1/43 | 18/18012 | 0.04213 | 0.102545 | 23.27132 | ENSG00000168685 | IL7R | GO_BP |
| GO:0002902~regulation of B cell apoptotic process | 1 | 1/43 | 18/18012 | 0.04213 | 0.102545 | 23.27132 | ENSG00000240972 | MIF | GO_BP |
| GO:0021756~striatum development | 1 | 1/43 | 18/18012 | 0.04213 | 0.102545 | 23.27132 | ENSG00000122641 | INHBA | GO_BP |
| GO:0042095~interferon-gamma biosynthetic process | 1 | 1/43 | 18/18012 | 0.04213 | 0.102545 | 23.27132 | ENSG00000122641 | INHBA | GO_BP |
| GO:0043555~regulation of translation in response to stress | 1 | 1/43 | 18/18012 | 0.04213 | 0.102545 | 23.27132 | ENSG00000055332 | EIF2AK2 | GO_BP |
| GO:0044320~cellular response to leptin stimulus | 1 | 1/43 | 18/18012 | 0.04213 | 0.102545 | 23.27132 | ENSG00000119508 | NR4A3 | GO_BP |
| GO:0045780~positive regulation of bone resorption | 1 | 1/43 | 18/18012 | 0.04213 | 0.102545 | 23.27132 | ENSG00000146648 | EGFR | GO_BP |
| GO:0046852~positive regulation of bone remodeling | 1 | 1/43 | 18/18012 | 0.04213 | 0.102545 | 23.27132 | ENSG00000146648 | EGFR | GO_BP |
| GO:0048521~negative regulation of behavior | 1 | 1/43 | 18/18012 | 0.04213 | 0.102545 | 23.27132 | ENSG00000104918 | RETN | GO_BP |
| GO:0051023~regulation of immunoglobulin secretion | 1 | 1/43 | 18/18012 | 0.04213 | 0.102545 | 23.27132 | ENSG00000136244 | IL6 | GO_BP |
| GO:0060749~mammary gland alveolus development | 1 | 1/43 | 18/18012 | 0.04213 | 0.102545 | 23.27132 | ENSG00000109321 | AREG | GO_BP |
| GO:0061377~mammary gland lobule development | 1 | 1/43 | 18/18012 | 0.04213 | 0.102545 | 23.27132 | ENSG00000109321 | AREG | GO_BP |
| GO:0070233~negative regulation of T cell apoptotic process | 1 | 1/43 | 18/18012 | 0.04213 | 0.102545 | 23.27132 | ENSG00000168685 | IL7R | GO_BP |
| GO:0071318~cellular response to ATP | 1 | 1/43 | 18/18012 | 0.04213 | 0.102545 | 23.27132 | ENSG00000073756 | PTGS2 | GO_BP |
| GO:0071371~cellular response to gonadotropin stimulus | 1 | 1/43 | 18/18012 | 0.04213 | 0.102545 | 23.27132 | ENSG00000122641 | INHBA | GO_BP |
| GO:0072077~renal vesicle morphogenesis | 1 | 1/43 | 18/18012 | 0.04213 | 0.102545 | 23.27132 | ENSG00000128342 | LIF | GO_BP |
| GO:0072574~hepatocyte proliferation | 1 | 1/43 | 18/18012 | 0.04213 | 0.102545 | 23.27132 | ENSG00000118503 | TNFAIP3 | GO_BP |
| GO:0072575~epithelial cell proliferation involved in liver morphogenesis | 1 | 1/43 | 18/18012 | 0.04213 | 0.102545 | 23.27132 | ENSG00000118503 | TNFAIP3 | GO_BP |
| GO:1902165~regulation of intrinsic apoptotic signaling pathway in response to DNA damage by p53 class mediator | 1 | 1/43 | 18/18012 | 0.04213 | 0.102545 | 23.27132 | ENSG00000240972 | MIF | GO_BP |
| GO:2000193~positive regulation of fatty acid transport | 1 | 1/43 | 18/18012 | 0.04213 | 0.102545 | 23.27132 | ENSG00000240972 | MIF | GO_BP |
| GO:0050715~positive regulation of cytokine secretion | 2 | 2/43 | 137/18012 | 0.042336 | 0.102915 | 6.115091 | ENSG00000240972/ENSG00000157873 | MIF/TNFRSF14 | GO_BP |
| GO:0031644~regulation of neurological system process | 2 | 2/43 | 138/18012 | 0.042895 | 0.104142 | 6.070779 | ENSG00000139574/ENSG00000267281 | NPFF/AC023509.3 | GO_BP |
| GO:0010631~epithelial cell migration | 3 | 3/43 | 328/18012 | 0.043238 | 0.104406 | 3.831254 | ENSG00000073756/ENSG00000145147/ENSG00000118257 | PTGS2/SLIT2/NRP2 | GO_BP |
| GO:0002831~regulation of response to biotic stimulus | 2 | 2/43 | 139/18012 | 0.043456 | 0.104406 | 6.027104 | ENSG00000118503/ENSG00000240972 | TNFAIP3/MIF | GO_BP |
| GO:0038127~ERBB signaling pathway | 2 | 2/43 | 139/18012 | 0.043456 | 0.104406 | 6.027104 | ENSG00000109321/ENSG00000146648 | AREG/EGFR | GO_BP |
| GO:0001655~urogenital system development | 3 | 3/43 | 330/18012 | 0.043893 | 0.104406 | 3.808034 | ENSG00000145147/ENSG00000180871/ENSG00000128342 | SLIT2/CXCR2/LIF | GO_BP |
| GO:0090132~epithelium migration | 3 | 3/43 | 331/18012 | 0.044223 | 0.104406 | 3.796529 | ENSG00000073756/ENSG00000145147/ENSG00000118257 | PTGS2/SLIT2/NRP2 | GO_BP |
| GO:0002363~alpha-beta T cell lineage commitment | 1 | 1/43 | 19/18012 | 0.044419 | 0.104406 | 22.04651 | ENSG00000136244 | IL6 | GO_BP |
| GO:0002544~chronic inflammatory response | 1 | 1/43 | 19/18012 | 0.044419 | 0.104406 | 22.04651 | ENSG00000118503 | TNFAIP3 | GO_BP |
| GO:0002710~negative regulation of T cell mediated immunity | 1 | 1/43 | 19/18012 | 0.044419 | 0.104406 | 22.04651 | ENSG00000168685 | IL7R | GO_BP |
| GO:0002726~positive regulation of T cell cytokine production | 1 | 1/43 | 19/18012 | 0.044419 | 0.104406 | 22.04651 | ENSG00000136244 | IL6 | GO_BP |
| GO:0007350~blastoderm segmentation | 1 | 1/43 | 19/18012 | 0.044419 | 0.104406 | 22.04651 | ENSG00000118257 | NRP2 | GO_BP |
| GO:0010888~negative regulation of lipid storage | 1 | 1/43 | 19/18012 | 0.044419 | 0.104406 | 22.04651 | ENSG00000136244 | IL6 | GO_BP |
| GO:0032303~regulation of icosanoid secretion | 1 | 1/43 | 19/18012 | 0.044419 | 0.104406 | 22.04651 | ENSG00000240972 | MIF | GO_BP |
| GO:0032930~positive regulation of superoxide anion generation | 1 | 1/43 | 19/18012 | 0.044419 | 0.104406 | 22.04651 | ENSG00000146648 | EGFR | GO_BP |
| GO:0034138~toll-like receptor 3 signaling pathway | 1 | 1/43 | 19/18012 | 0.044419 | 0.104406 | 22.04651 | ENSG00000118503 | TNFAIP3 | GO_BP |
| GO:0048486~parasympathetic nervous system development | 1 | 1/43 | 19/18012 | 0.044419 | 0.104406 | 22.04651 | ENSG00000118257 | NRP2 | GO_BP |
| GO:0060004~reflex | 1 | 1/43 | 19/18012 | 0.044419 | 0.104406 | 22.04651 | ENSG00000119508 | NR4A3 | GO_BP |
| GO:0060231~mesenchymal to epithelial transition | 1 | 1/43 | 19/18012 | 0.044419 | 0.104406 | 22.04651 | ENSG00000128342 | LIF | GO_BP |
| GO:0060252~positive regulation of glial cell proliferation | 1 | 1/43 | 19/18012 | 0.044419 | 0.104406 | 22.04651 | ENSG00000136244 | IL6 | GO_BP |
| GO:0071498~cellular response to fluid shear stress | 1 | 1/43 | 19/18012 | 0.044419 | 0.104406 | 22.04651 | ENSG00000073756 | PTGS2 | GO_BP |
| GO:0072087~renal vesicle development | 1 | 1/43 | 19/18012 | 0.044419 | 0.104406 | 22.04651 | ENSG00000128342 | LIF | GO_BP |
| GO:0072576~liver morphogenesis | 1 | 1/43 | 19/18012 | 0.044419 | 0.104406 | 22.04651 | ENSG00000118503 | TNFAIP3 | GO_BP |
| GO:1903798~regulation of production of miRNAs involved in gene silencing by miRNA | 1 | 1/43 | 19/18012 | 0.044419 | 0.104406 | 22.04651 | ENSG00000146648 | EGFR | GO_BP |
| GO:1903978~regulation of microglial cell activation | 1 | 1/43 | 19/18012 | 0.044419 | 0.104406 | 22.04651 | ENSG00000136244 | IL6 | GO_BP |
| GO:1905939~regulation of gonad development | 1 | 1/43 | 19/18012 | 0.044419 | 0.104406 | 22.04651 | ENSG00000104918 | RETN | GO_BP |
| GO:2000251~positive regulation of actin cytoskeleton reorganization | 1 | 1/43 | 19/18012 | 0.044419 | 0.104406 | 22.04651 | ENSG00000174775 | HRAS | GO_BP |
| GO:2000696~regulation of epithelial cell differentiation involved in kidney development | 1 | 1/43 | 19/18012 | 0.044419 | 0.104406 | 22.04651 | ENSG00000128342 | LIF | GO_BP |
| GO:0009411~response to UV | 2 | 2/43 | 141/18012 | 0.044588 | 0.104546 | 5.941613 | ENSG00000073756/ENSG00000146648 | PTGS2/EGFR | GO_BP |
| GO:0060078~regulation of postsynaptic membrane potential | 2 | 2/43 | 141/18012 | 0.044588 | 0.104546 | 5.941613 | ENSG00000139574/ENSG00000267281 | NPFF/AC023509.3 | GO_BP |
| GO:0090130~tissue migration | 3 | 3/43 | 337/18012 | 0.046226 | 0.106892 | 3.728935 | ENSG00000073756/ENSG00000145147/ENSG00000118257 | PTGS2/SLIT2/NRP2 | GO_BP |
| GO:0002224~toll-like receptor signaling pathway | 2 | 2/43 | 144/18012 | 0.046305 | 0.106892 | 5.817829 | ENSG00000118503/ENSG00000171560 | TNFAIP3/FGA | GO_BP |
| GO:0045834~positive regulation of lipid metabolic process | 2 | 2/43 | 144/18012 | 0.046305 | 0.106892 | 5.817829 | ENSG00000073756/ENSG00000119508 | PTGS2/NR4A3 | GO_BP |
| GO:0002374~cytokine secretion involved in immune response | 1 | 1/43 | 20/18012 | 0.046703 | 0.106892 | 20.94419 | ENSG00000157873 | TNFRSF14 | GO_BP |
| GO:0010042~response to manganese ion | 1 | 1/43 | 20/18012 | 0.046703 | 0.106892 | 20.94419 | ENSG00000073756 | PTGS2 | GO_BP |
| GO:0010738~regulation of protein kinase A signaling | 1 | 1/43 | 20/18012 | 0.046703 | 0.106892 | 20.94419 | ENSG00000240972 | MIF | GO_BP |
| GO:0032495~response to muramyl dipeptide | 1 | 1/43 | 20/18012 | 0.046703 | 0.106892 | 20.94419 | ENSG00000118503 | TNFAIP3 | GO_BP |
| GO:0034143~regulation of toll-like receptor 4 signaling pathway | 1 | 1/43 | 20/18012 | 0.046703 | 0.106892 | 20.94419 | ENSG00000118503 | TNFAIP3 | GO_BP |
| GO:0043369~CD4-positive or CD8-positive, alpha-beta T cell lineage commitment | 1 | 1/43 | 20/18012 | 0.046703 | 0.106892 | 20.94419 | ENSG00000136244 | IL6 | GO_BP |
| GO:0043586~tongue development | 1 | 1/43 | 20/18012 | 0.046703 | 0.106892 | 20.94419 | ENSG00000146648 | EGFR | GO_BP |
| GO:0051767~nitric-oxide synthase biosynthetic process | 1 | 1/43 | 20/18012 | 0.046703 | 0.106892 | 20.94419 | ENSG00000105835 | NAMPT | GO_BP |
| GO:0051769~regulation of nitric-oxide synthase biosynthetic process | 1 | 1/43 | 20/18012 | 0.046703 | 0.106892 | 20.94419 | ENSG00000105835 | NAMPT | GO_BP |
| GO:0060602~branch elongation of an epithelium | 1 | 1/43 | 20/18012 | 0.046703 | 0.106892 | 20.94419 | ENSG00000109321 | AREG | GO_BP |
| GO:0071397~cellular response to cholesterol | 1 | 1/43 | 20/18012 | 0.046703 | 0.106892 | 20.94419 | ENSG00000122641 | INHBA | GO_BP |
| GO:0071636~positive regulation of transforming growth factor beta production | 1 | 1/43 | 20/18012 | 0.046703 | 0.106892 | 20.94419 | ENSG00000073756 | PTGS2 | GO_BP |
| GO:0072234~metanephric nephron tubule development | 1 | 1/43 | 20/18012 | 0.046703 | 0.106892 | 20.94419 | ENSG00000128342 | LIF | GO_BP |
| GO:0072643~interferon-gamma secretion | 1 | 1/43 | 20/18012 | 0.046703 | 0.106892 | 20.94419 | ENSG00000187608 | ISG15 | GO_BP |
| GO:1903204~negative regulation of oxidative stress-induced neuron death | 1 | 1/43 | 20/18012 | 0.046703 | 0.106892 | 20.94419 | ENSG00000119508 | NR4A3 | GO_BP |
| GO:2000316~regulation of T-helper 17 type immune response | 1 | 1/43 | 20/18012 | 0.046703 | 0.106892 | 20.94419 | ENSG00000144802 | NFKBIZ | GO_BP |
| GO:2000831~regulation of steroid hormone secretion | 1 | 1/43 | 20/18012 | 0.046703 | 0.106892 | 20.94419 | ENSG00000104918 | RETN | GO_BP |
| GO:0001101~response to acid chemical | 3 | 3/43 | 340/18012 | 0.047245 | 0.107876 | 3.696033 | ENSG00000073756/ENSG00000146648/ENSG00000197081 | PTGS2/EGFR/IGF2R | GO_BP |
| GO:0051056~regulation of small GTPase mediated signal transduction | 3 | 3/43 | 340/18012 | 0.047245 | 0.107876 | 3.696033 | ENSG00000174775/ENSG00000145147/ENSG00000187266 | HRAS/SLIT2/EPOR | GO_BP |
| GO:0014065~phosphatidylinositol 3-kinase signaling | 2 | 2/43 | 146/18012 | 0.047464 | 0.108247 | 5.738133 | ENSG00000146648/ENSG00000187266 | EGFR/EPOR | GO_BP |
| GO:0002706~regulation of lymphocyte mediated immunity | 2 | 2/43 | 147/18012 | 0.048047 | 0.108607 | 5.699098 | ENSG00000168685/ENSG00000136244 | IL7R/IL6 | GO_BP |
| GO:0010212~response to ionizing radiation | 2 | 2/43 | 147/18012 | 0.048047 | 0.108607 | 5.699098 | ENSG00000174775/ENSG00000105835 | HRAS/NAMPT | GO_BP |
| GO:0019359~nicotinamide nucleotide biosynthetic process | 2 | 2/43 | 147/18012 | 0.048047 | 0.108607 | 5.699098 | ENSG00000073756/ENSG00000105835 | PTGS2/NAMPT | GO_BP |
| GO:0019363~pyridine nucleotide biosynthetic process | 2 | 2/43 | 147/18012 | 0.048047 | 0.108607 | 5.699098 | ENSG00000073756/ENSG00000105835 | PTGS2/NAMPT | GO_BP |
| GO:0032675~regulation of interleukin-6 production | 2 | 2/43 | 147/18012 | 0.048047 | 0.108607 | 5.699098 | ENSG00000118503/ENSG00000136244 | TNFAIP3/IL6 | GO_BP |
| GO:0014074~response to purine-containing compound | 2 | 2/43 | 148/18012 | 0.048633 | 0.108607 | 5.660591 | ENSG00000073756/ENSG00000109321 | PTGS2/AREG | GO_BP |
| GO:0043524~negative regulation of neuron apoptotic process | 2 | 2/43 | 148/18012 | 0.048633 | 0.108607 | 5.660591 | ENSG00000174775/ENSG00000119508 | HRAS/NR4A3 | GO_BP |
| GO:0051592~response to calcium ion | 2 | 2/43 | 148/18012 | 0.048633 | 0.108607 | 5.660591 | ENSG00000171560/ENSG00000146648 | FGA/EGFR | GO_BP |
| GO:0003177~pulmonary valve development | 1 | 1/43 | 21/18012 | 0.048981 | 0.108607 | 19.94684 | ENSG00000145147 | SLIT2 | GO_BP |
| GO:0031290~retinal ganglion cell axon guidance | 1 | 1/43 | 21/18012 | 0.048981 | 0.108607 | 19.94684 | ENSG00000145147 | SLIT2 | GO_BP |
| GO:0032682~negative regulation of chemokine production | 1 | 1/43 | 21/18012 | 0.048981 | 0.108607 | 19.94684 | ENSG00000136244 | IL6 | GO_BP |
| GO:0033005~positive regulation of mast cell activation | 1 | 1/43 | 21/18012 | 0.048981 | 0.108607 | 19.94684 | ENSG00000119508 | NR4A3 | GO_BP |
| GO:0033141~positive regulation of peptidyl-serine phosphorylation of STAT protein | 1 | 1/43 | 21/18012 | 0.048981 | 0.108607 | 19.94684 | ENSG00000128342 | LIF | GO_BP |
| GO:0035743~CD4-positive, alpha-beta T cell cytokine production | 1 | 1/43 | 21/18012 | 0.048981 | 0.108607 | 19.94684 | ENSG00000136244 | IL6 | GO_BP |
| GO:0045624~positive regulation of T-helper cell differentiation | 1 | 1/43 | 21/18012 | 0.048981 | 0.108607 | 19.94684 | ENSG00000144802 | NFKBIZ | GO_BP |
| GO:0046426~negative regulation of JAK-STAT cascade | 1 | 1/43 | 21/18012 | 0.048981 | 0.108607 | 19.94684 | ENSG00000184557 | SOCS3 | GO_BP |
| GO:0048245~eosinophil chemotaxis | 1 | 1/43 | 21/18012 | 0.048981 | 0.108607 | 19.94684 | ENSG00000106178 | CCL24 | GO_BP |
| GO:0048485~sympathetic nervous system development | 1 | 1/43 | 21/18012 | 0.048981 | 0.108607 | 19.94684 | ENSG00000118257 | NRP2 | GO_BP |
| GO:0060055~angiogenesis involved in wound healing | 1 | 1/43 | 21/18012 | 0.048981 | 0.108607 | 19.94684 | ENSG00000118503 | TNFAIP3 | GO_BP |
| GO:0060713~labyrinthine layer morphogenesis | 1 | 1/43 | 21/18012 | 0.048981 | 0.108607 | 19.94684 | ENSG00000184557 | SOCS3 | GO_BP |
| GO:0070920~regulation of production of small RNA involved in gene silencing by RNA | 1 | 1/43 | 21/18012 | 0.048981 | 0.108607 | 19.94684 | ENSG00000146648 | EGFR | GO_BP |
| GO:1902473~regulation of protein localization to synapse | 1 | 1/43 | 21/18012 | 0.048981 | 0.108607 | 19.94684 | ENSG00000174775 | HRAS | GO_BP |
| GO:1903055~positive regulation of extracellular matrix organization | 1 | 1/43 | 21/18012 | 0.048981 | 0.108607 | 19.94684 | ENSG00000136244 | IL6 | GO_BP |
| GO:2000773~negative regulation of cellular senescence | 1 | 1/43 | 21/18012 | 0.048981 | 0.108607 | 19.94684 | ENSG00000105835 | NAMPT | GO_BP |
| GO:0048754~branching morphogenesis of an epithelial tube | 2 | 2/43 | 150/18012 | 0.049813 | 0.110197 | 5.585116 | ENSG00000145147/ENSG00000109321 | SLIT2/AREG | GO_BP |
| GO:0072525~pyridine-containing compound biosynthetic process | 2 | 2/43 | 150/18012 | 0.049813 | 0.110197 | 5.585116 | ENSG00000073756/ENSG00000105835 | PTGS2/NAMPT | GO_BP |
| GO:0070997~neuron death | 3 | 3/43 | 349/18012 | 0.050367 | 0.111254 | 3.60072 | ENSG00000174775/ENSG00000105835/ENSG00000119508 | HRAS/NAMPT/NR4A3 | GO_BP |
| GO:0090316~positive regulation of intracellular protein transport | 2 | 2/43 | 151/18012 | 0.050406 | 0.111254 | 5.548129 | ENSG00000073756/ENSG00000174775 | PTGS2/HRAS | GO_BP |
| GO:0062013~positive regulation of small molecule metabolic process | 2 | 2/43 | 152/18012 | 0.051003 | 0.111457 | 5.511628 | ENSG00000073756/ENSG00000119508 | PTGS2/NR4A3 | GO_BP |
| GO:0010226~response to lithium ion | 1 | 1/43 | 22/18012 | 0.051254 | 0.111457 | 19.04017 | ENSG00000073756 | PTGS2 | GO_BP |
| GO:0031342~negative regulation of cell killing | 1 | 1/43 | 22/18012 | 0.051254 | 0.111457 | 19.04017 | ENSG00000168685 | IL7R | GO_BP |
| GO:0032928~regulation of superoxide anion generation | 1 | 1/43 | 22/18012 | 0.051254 | 0.111457 | 19.04017 | ENSG00000146648 | EGFR | GO_BP |
| GO:0035584~calcium-mediated signaling using intracellular calcium source | 1 | 1/43 | 22/18012 | 0.051254 | 0.111457 | 19.04017 | ENSG00000164825 | DEFB1 | GO_BP |
| GO:0044321~response to leptin | 1 | 1/43 | 22/18012 | 0.051254 | 0.111457 | 19.04017 | ENSG00000119508 | NR4A3 | GO_BP |
| GO:0044342~type B pancreatic cell proliferation | 1 | 1/43 | 22/18012 | 0.051254 | 0.111457 | 19.04017 | ENSG00000119508 | NR4A3 | GO_BP |
| GO:0045723~positive regulation of fatty acid biosynthetic process | 1 | 1/43 | 22/18012 | 0.051254 | 0.111457 | 19.04017 | ENSG00000073756 | PTGS2 | GO_BP |
| GO:0048305~immunoglobulin secretion | 1 | 1/43 | 22/18012 | 0.051254 | 0.111457 | 19.04017 | ENSG00000136244 | IL6 | GO_BP |
| GO:0051151~negative regulation of smooth muscle cell differentiation | 1 | 1/43 | 22/18012 | 0.051254 | 0.111457 | 19.04017 | ENSG00000101096 | NFATC2 | GO_BP |
| GO:1902254~negative regulation of intrinsic apoptotic signaling pathway by p53 class mediator | 1 | 1/43 | 22/18012 | 0.051254 | 0.111457 | 19.04017 | ENSG00000240972 | MIF | GO_BP |
| GO:1903205~regulation of hydrogen peroxide-induced cell death | 1 | 1/43 | 22/18012 | 0.051254 | 0.111457 | 19.04017 | ENSG00000119508 | NR4A3 | GO_BP |
| GO:1904754~positive regulation of vascular associated smooth muscle cell migration | 1 | 1/43 | 22/18012 | 0.051254 | 0.111457 | 19.04017 | ENSG00000119508 | NR4A3 | GO_BP |
| GO:0051271~negative regulation of cellular component movement | 3 | 3/43 | 352/18012 | 0.05143 | 0.111714 | 3.570032 | ENSG00000130303/ENSG00000240972/ENSG00000145147 | BST2/MIF/SLIT2 | GO_BP |
| GO:0030168~platelet activation | 2 | 2/43 | 153/18012 | 0.051602 | 0.111959 | 5.475604 | ENSG00000171560/ENSG00000136244 | FGA/IL6 | GO_BP |
| GO:0010770~positive regulation of cell morphogenesis involved in differentiation | 2 | 2/43 | 154/18012 | 0.052203 | 0.113136 | 5.440048 | ENSG00000171560/ENSG00000145147 | FGA/SLIT2 | GO_BP |
| GO:0042129~regulation of T cell proliferation | 2 | 2/43 | 155/18012 | 0.052807 | 0.114316 | 5.404951 | ENSG00000136244/ENSG00000157873 | IL6/TNFRSF14 | GO_BP |
| GO:0032635~interleukin-6 production | 2 | 2/43 | 156/18012 | 0.053414 | 0.114698 | 5.370304 | ENSG00000118503/ENSG00000136244 | TNFAIP3/IL6 | GO_BP |
| GO:0021854~hypothalamus development | 1 | 1/43 | 23/18012 | 0.053522 | 0.114698 | 18.21234 | ENSG00000118257 | NRP2 | GO_BP |
| GO:0032703~negative regulation of interleukin-2 production | 1 | 1/43 | 23/18012 | 0.053522 | 0.114698 | 18.21234 | ENSG00000118503 | TNFAIP3 | GO_BP |
| GO:0033139~regulation of peptidyl-serine phosphorylation of STAT protein | 1 | 1/43 | 23/18012 | 0.053522 | 0.114698 | 18.21234 | ENSG00000128342 | LIF | GO_BP |
| GO:0071157~negative regulation of cell cycle arrest | 1 | 1/43 | 23/18012 | 0.053522 | 0.114698 | 18.21234 | ENSG00000240972 | MIF | GO_BP |
| GO:0071425~hematopoietic stem cell proliferation | 1 | 1/43 | 23/18012 | 0.053522 | 0.114698 | 18.21234 | ENSG00000055332 | EIF2AK2 | GO_BP |
| GO:0072215~regulation of metanephros development | 1 | 1/43 | 23/18012 | 0.053522 | 0.114698 | 18.21234 | ENSG00000128342 | LIF | GO_BP |
| GO:0072243~metanephric nephron epithelium development | 1 | 1/43 | 23/18012 | 0.053522 | 0.114698 | 18.21234 | ENSG00000128342 | LIF | GO_BP |
| GO:2000637~positive regulation of gene silencing by miRNA | 1 | 1/43 | 23/18012 | 0.053522 | 0.114698 | 18.21234 | ENSG00000146648 | EGFR | GO_BP |
| GO:0006869~lipid transport | 3 | 3/43 | 359/18012 | 0.053953 | 0.115494 | 3.500421 | ENSG00000240972/ENSG00000122641/ENSG00000104918 | MIF/INHBA/RETN | GO_BP |
| GO:0032680~regulation of tumor necrosis factor production | 2 | 2/43 | 158/18012 | 0.054634 | 0.1168 | 5.302326 | ENSG00000118503/ENSG00000240972 | TNFAIP3/MIF | GO_BP |
| GO:0043687~post-translational protein modification | 3 | 3/43 | 361/18012 | 0.054685 | 0.1168 | 3.481028 | ENSG00000184557/ENSG00000171560/ENSG00000136244 | SOCS3/FGA/IL6 | GO_BP |
| GO:0030833~regulation of actin filament polymerization | 2 | 2/43 | 159/18012 | 0.055248 | 0.117334 | 5.268978 | ENSG00000106178/ENSG00000145147 | CCL24/SLIT2 | GO_BP |
| GO:0010038~response to metal ion | 3 | 3/43 | 363/18012 | 0.055422 | 0.117334 | 3.461849 | ENSG00000171560/ENSG00000073756/ENSG00000146648 | FGA/PTGS2/EGFR | GO_BP |
| GO:0001783~B cell apoptotic process | 1 | 1/43 | 24/18012 | 0.055784 | 0.117334 | 17.45349 | ENSG00000240972 | MIF | GO_BP |
| GO:0002227~innate immune response in mucosa | 1 | 1/43 | 24/18012 | 0.055784 | 0.117334 | 17.45349 | ENSG00000164825 | DEFB1 | GO_BP |
| GO:0010288~response to lead ion | 1 | 1/43 | 24/18012 | 0.055784 | 0.117334 | 17.45349 | ENSG00000073756 | PTGS2 | GO_BP |
| GO:0021544~subpallium development | 1 | 1/43 | 24/18012 | 0.055784 | 0.117334 | 17.45349 | ENSG00000122641 | INHBA | GO_BP |
| GO:0031639~plasminogen activation | 1 | 1/43 | 24/18012 | 0.055784 | 0.117334 | 17.45349 | ENSG00000171560 | FGA | GO_BP |
| GO:0033081~regulation of T cell differentiation in thymus | 1 | 1/43 | 24/18012 | 0.055784 | 0.117334 | 17.45349 | ENSG00000168685 | IL7R | GO_BP |
| GO:0036315~cellular response to sterol | 1 | 1/43 | 24/18012 | 0.055784 | 0.117334 | 17.45349 | ENSG00000122641 | INHBA | GO_BP |
| GO:0042832~defense response to protozoan | 1 | 1/43 | 24/18012 | 0.055784 | 0.117334 | 17.45349 | ENSG00000174775 | HRAS | GO_BP |
| GO:0060148~positive regulation of posttranscriptional gene silencing | 1 | 1/43 | 24/18012 | 0.055784 | 0.117334 | 17.45349 | ENSG00000146648 | EGFR | GO_BP |
| GO:0090023~positive regulation of neutrophil chemotaxis | 1 | 1/43 | 24/18012 | 0.055784 | 0.117334 | 17.45349 | ENSG00000180871 | CXCR2 | GO_BP |
| GO:1905063~regulation of vascular smooth muscle cell differentiation | 1 | 1/43 | 24/18012 | 0.055784 | 0.117334 | 17.45349 | ENSG00000101096 | NFATC2 | GO_BP |
| GO:0040013~negative regulation of locomotion | 3 | 3/43 | 364/18012 | 0.055792 | 0.117334 | 3.452338 | ENSG00000130303/ENSG00000240972/ENSG00000145147 | BST2/MIF/SLIT2 | GO_BP |
| GO:0001936~regulation of endothelial cell proliferation | 2 | 2/43 | 161/18012 | 0.056484 | 0.118142 | 5.203524 | ENSG00000106178/ENSG00000118257 | CCL24/NRP2 | GO_BP |
| GO:0031214~biomineral tissue development | 2 | 2/43 | 161/18012 | 0.056484 | 0.118142 | 5.203524 | ENSG00000187608/ENSG00000073756 | ISG15/PTGS2 | GO_BP |
| GO:0032640~tumor necrosis factor production | 2 | 2/43 | 161/18012 | 0.056484 | 0.118142 | 5.203524 | ENSG00000118503/ENSG00000240972 | TNFAIP3/MIF | GO_BP |
| GO:0043534~blood vessel endothelial cell migration | 2 | 2/43 | 161/18012 | 0.056484 | 0.118142 | 5.203524 | ENSG00000073756/ENSG00000145147 | PTGS2/SLIT2 | GO_BP |
| GO:1903555~regulation of tumor necrosis factor superfamily cytokine production | 2 | 2/43 | 161/18012 | 0.056484 | 0.118142 | 5.203524 | ENSG00000118503/ENSG00000240972 | TNFAIP3/MIF | GO_BP |
| GO:0032535~regulation of cellular component size | 3 | 3/43 | 367/18012 | 0.056909 | 0.118681 | 3.424118 | ENSG00000168685/ENSG00000106178/ENSG00000145147 | IL7R/CCL24/SLIT2 | GO_BP |
| GO:0002040~sprouting angiogenesis | 2 | 2/43 | 162/18012 | 0.057105 | 0.118681 | 5.171404 | ENSG00000073756/ENSG00000145147 | PTGS2/SLIT2 | GO_BP |
| GO:0050728~negative regulation of inflammatory response | 2 | 2/43 | 162/18012 | 0.057105 | 0.118681 | 5.171404 | ENSG00000184557/ENSG00000118503 | SOCS3/TNFAIP3 | GO_BP |
| GO:0006633~fatty acid biosynthetic process | 2 | 2/43 | 163/18012 | 0.057729 | 0.118681 | 5.139678 | ENSG00000073756/ENSG00000240972 | PTGS2/MIF | GO_BP |
| GO:0010634~positive regulation of epithelial cell migration | 2 | 2/43 | 163/18012 | 0.057729 | 0.118681 | 5.139678 | ENSG00000073756/ENSG00000118257 | PTGS2/NRP2 | GO_BP |
| GO:2001242~regulation of intrinsic apoptotic signaling pathway | 2 | 2/43 | 163/18012 | 0.057729 | 0.118681 | 5.139678 | ENSG00000073756/ENSG00000240972 | PTGS2/MIF | GO_BP |
| GO:0001562~response to protozoan | 1 | 1/43 | 25/18012 | 0.058041 | 0.118681 | 16.75535 | ENSG00000174775 | HRAS | GO_BP |
| GO:0002507~tolerance induction | 1 | 1/43 | 25/18012 | 0.058041 | 0.118681 | 16.75535 | ENSG00000118503 | TNFAIP3 | GO_BP |
| GO:0002719~negative regulation of cytokine production involved in immune response | 1 | 1/43 | 25/18012 | 0.058041 | 0.118681 | 16.75535 | ENSG00000130303 | BST2 | GO_BP |
| GO:0006309~apoptotic DNA fragmentation | 1 | 1/43 | 25/18012 | 0.058041 | 0.118681 | 16.75535 | ENSG00000136244 | IL6 | GO_BP |
| GO:0021952~central nervous system projection neuron axonogenesis | 1 | 1/43 | 25/18012 | 0.058041 | 0.118681 | 16.75535 | ENSG00000145147 | SLIT2 | GO_BP |
| GO:0033688~regulation of osteoblast proliferation | 1 | 1/43 | 25/18012 | 0.058041 | 0.118681 | 16.75535 | ENSG00000055332 | EIF2AK2 | GO_BP |
| GO:0060330~regulation of response to interferon-gamma | 1 | 1/43 | 25/18012 | 0.058041 | 0.118681 | 16.75535 | ENSG00000184557 | SOCS3 | GO_BP |
| GO:0060334~regulation of interferon-gamma-mediated signaling pathway | 1 | 1/43 | 25/18012 | 0.058041 | 0.118681 | 16.75535 | ENSG00000184557 | SOCS3 | GO_BP |
| GO:0060444~branching involved in mammary gland duct morphogenesis | 1 | 1/43 | 25/18012 | 0.058041 | 0.118681 | 16.75535 | ENSG00000109321 | AREG | GO_BP |
| GO:0060571~morphogenesis of an epithelial fold | 1 | 1/43 | 25/18012 | 0.058041 | 0.118681 | 16.75535 | ENSG00000146648 | EGFR | GO_BP |
| GO:0072202~cell differentiation involved in metanephros development | 1 | 1/43 | 25/18012 | 0.058041 | 0.118681 | 16.75535 | ENSG00000128342 | LIF | GO_BP |
| GO:0072273~metanephric nephron morphogenesis | 1 | 1/43 | 25/18012 | 0.058041 | 0.118681 | 16.75535 | ENSG00000128342 | LIF | GO_BP |
| GO:0072677~eosinophil migration | 1 | 1/43 | 25/18012 | 0.058041 | 0.118681 | 16.75535 | ENSG00000106178 | CCL24 | GO_BP |
| GO:0090025~regulation of monocyte chemotaxis | 1 | 1/43 | 25/18012 | 0.058041 | 0.118681 | 16.75535 | ENSG00000145147 | SLIT2 | GO_BP |
| GO:2001038~regulation of cellular response to drug | 1 | 1/43 | 25/18012 | 0.058041 | 0.118681 | 16.75535 | ENSG00000119508 | NR4A3 | GO_BP |
| GO:0033209~tumor necrosis factor-mediated signaling pathway | 2 | 2/43 | 164/18012 | 0.058355 | 0.119197 | 5.108338 | ENSG00000118503/ENSG00000157873 | TNFAIP3/TNFRSF14 | GO_BP |
| GO:0001701~in utero embryonic development | 3 | 3/43 | 373/18012 | 0.059177 | 0.120746 | 3.369038 | ENSG00000184557/ENSG00000128342/ENSG00000146648 | SOCS3/LIF/EGFR | GO_BP |
| GO:0002244~hematopoietic progenitor cell differentiation | 2 | 2/43 | 166/18012 | 0.059615 | 0.121091 | 5.046792 | ENSG00000055332/ENSG00000122641 | EIF2AK2/INHBA | GO_BP |
| GO:0071706~tumor necrosis factor superfamily cytokine production | 2 | 2/43 | 166/18012 | 0.059615 | 0.121091 | 5.046792 | ENSG00000118503/ENSG00000240972 | TNFAIP3/MIF | GO_BP |
| GO:0001906~cell killing | 2 | 2/43 | 167/18012 | 0.060248 | 0.121091 | 5.016572 | ENSG00000115523/ENSG00000168685 | GNLY/IL7R | GO_BP |
| GO:1901568~fatty acid derivative metabolic process | 2 | 2/43 | 167/18012 | 0.060248 | 0.121091 | 5.016572 | ENSG00000073756/ENSG00000240972 | PTGS2/MIF | GO_BP |
| GO:1990138~neuron projection extension | 2 | 2/43 | 167/18012 | 0.060248 | 0.121091 | 5.016572 | ENSG00000145147/ENSG00000118257 | SLIT2/NRP2 | GO_BP |
| GO:0002360~T cell lineage commitment | 1 | 1/43 | 26/18012 | 0.060293 | 0.121091 | 16.11091 | ENSG00000136244 | IL6 | GO_BP |
| GO:0010758~regulation of macrophage chemotaxis | 1 | 1/43 | 26/18012 | 0.060293 | 0.121091 | 16.11091 | ENSG00000240972 | MIF | GO_BP |
| GO:0034114~regulation of heterotypic cell-cell adhesion | 1 | 1/43 | 26/18012 | 0.060293 | 0.121091 | 16.11091 | ENSG00000171560 | FGA | GO_BP |
| GO:0036474~cell death in response to hydrogen peroxide | 1 | 1/43 | 26/18012 | 0.060293 | 0.121091 | 16.11091 | ENSG00000119508 | NR4A3 | GO_BP |
| GO:0048169~regulation of long-term neuronal synaptic plasticity | 1 | 1/43 | 26/18012 | 0.060293 | 0.121091 | 16.11091 | ENSG00000174775 | HRAS | GO_BP |
| GO:0060669~embryonic placenta morphogenesis | 1 | 1/43 | 26/18012 | 0.060293 | 0.121091 | 16.11091 | ENSG00000184557 | SOCS3 | GO_BP |
| GO:0071624~positive regulation of granulocyte chemotaxis | 1 | 1/43 | 26/18012 | 0.060293 | 0.121091 | 16.11091 | ENSG00000180871 | CXCR2 | GO_BP |
| GO:1903203~regulation of oxidative stress-induced neuron death | 1 | 1/43 | 26/18012 | 0.060293 | 0.121091 | 16.11091 | ENSG00000119508 | NR4A3 | GO_BP |
| GO:2001024~negative regulation of response to drug | 1 | 1/43 | 26/18012 | 0.060293 | 0.121091 | 16.11091 | ENSG00000119508 | NR4A3 | GO_BP |
| GO:2001025~positive regulation of response to drug | 1 | 1/43 | 26/18012 | 0.060293 | 0.121091 | 16.11091 | ENSG00000104918 | RETN | GO_BP |
| GO:0032874~positive regulation of stress-activated MAPK cascade | 2 | 2/43 | 170/18012 | 0.062163 | 0.123916 | 4.928044 | ENSG00000055332/ENSG00000174775 | EIF2AK2/HRAS | GO_BP |
| GO:0051147~regulation of muscle cell differentiation | 2 | 2/43 | 170/18012 | 0.062163 | 0.123916 | 4.928044 | ENSG00000101096/ENSG00000161055 | NFATC2/SCGB3A1 | GO_BP |
| GO:0003148~outflow tract septum morphogenesis | 1 | 1/43 | 27/18012 | 0.06254 | 0.123916 | 15.51421 | ENSG00000118257 | NRP2 | GO_BP |
| GO:0036475~neuron death in response to oxidative stress | 1 | 1/43 | 27/18012 | 0.06254 | 0.123916 | 15.51421 | ENSG00000119508 | NR4A3 | GO_BP |
| GO:0042501~serine phosphorylation of STAT protein | 1 | 1/43 | 27/18012 | 0.06254 | 0.123916 | 15.51421 | ENSG00000128342 | LIF | GO_BP |
| GO:0042730~fibrinolysis | 1 | 1/43 | 27/18012 | 0.06254 | 0.123916 | 15.51421 | ENSG00000171560 | FGA | GO_BP |
| GO:0045932~negative regulation of muscle contraction | 1 | 1/43 | 27/18012 | 0.06254 | 0.123916 | 15.51421 | ENSG00000073756 | PTGS2 | GO_BP |
| GO:0072378~blood coagulation, fibrin clot formation | 1 | 1/43 | 27/18012 | 0.06254 | 0.123916 | 15.51421 | ENSG00000171560 | FGA | GO_BP |
| GO:0120033~negative regulation of plasma membrane bounded cell projection assembly | 1 | 1/43 | 27/18012 | 0.06254 | 0.123916 | 15.51421 | ENSG00000145147 | SLIT2 | GO_BP |
| GO:1904893~negative regulation of STAT cascade | 1 | 1/43 | 27/18012 | 0.06254 | 0.123916 | 15.51421 | ENSG00000184557 | SOCS3 | GO_BP |
| GO:1905208~negative regulation of cardiocyte differentiation | 1 | 1/43 | 27/18012 | 0.06254 | 0.123916 | 15.51421 | ENSG00000146648 | EGFR | GO_BP |
| GO:1990776~response to angiotensin | 1 | 1/43 | 27/18012 | 0.06254 | 0.123916 | 15.51421 | ENSG00000073756 | PTGS2 | GO_BP |
| GO:2000191~regulation of fatty acid transport | 1 | 1/43 | 27/18012 | 0.06254 | 0.123916 | 15.51421 | ENSG00000240972 | MIF | GO_BP |
| GO:0006631~fatty acid metabolic process | 3 | 3/43 | 382/18012 | 0.062657 | 0.12393 | 3.289663 | ENSG00000073756/ENSG00000240972/ENSG00000119508 | PTGS2/MIF/NR4A3 | GO_BP |
| GO:0003205~cardiac chamber development | 2 | 2/43 | 171/18012 | 0.062805 | 0.12393 | 4.899225 | ENSG00000145147/ENSG00000118257 | SLIT2/NRP2 | GO_BP |
| GO:0030324~lung development | 2 | 2/43 | 171/18012 | 0.062805 | 0.12393 | 4.899225 | ENSG00000128342/ENSG00000146648 | LIF/EGFR | GO_BP |
| GO:0070304~positive regulation of stress-activated protein kinase signaling cascade | 2 | 2/43 | 171/18012 | 0.062805 | 0.12393 | 4.899225 | ENSG00000055332/ENSG00000174775 | EIF2AK2/HRAS | GO_BP |
| GO:0045787~positive regulation of cell cycle | 3 | 3/43 | 385/18012 | 0.063839 | 0.125711 | 3.264029 | ENSG00000240972/ENSG00000146648/ENSG00000119508 | MIF/EGFR/NR4A3 | GO_BP |
| GO:1901653~cellular response to peptide | 3 | 3/43 | 385/18012 | 0.063839 | 0.125711 | 3.264029 | ENSG00000184557/ENSG00000105835/ENSG00000119508 | SOCS3/NAMPT/NR4A3 | GO_BP |
| GO:0051897~positive regulation of protein kinase B signaling | 2 | 2/43 | 173/18012 | 0.064097 | 0.125759 | 4.842586 | ENSG00000109321/ENSG00000146648 | AREG/EGFR | GO_BP |
| GO:0120032~regulation of plasma membrane bounded cell projection assembly | 2 | 2/43 | 173/18012 | 0.064097 | 0.125759 | 4.842586 | ENSG00000174775/ENSG00000145147 | HRAS/SLIT2 | GO_BP |
| GO:0003180~aortic valve morphogenesis | 1 | 1/43 | 28/18012 | 0.064781 | 0.125759 | 14.96013 | ENSG00000145147 | SLIT2 | GO_BP |
| GO:0008045~motor neuron axon guidance | 1 | 1/43 | 28/18012 | 0.064781 | 0.125759 | 14.96013 | ENSG00000145147 | SLIT2 | GO_BP |
| GO:0033598~mammary gland epithelial cell proliferation | 1 | 1/43 | 28/18012 | 0.064781 | 0.125759 | 14.96013 | ENSG00000109321 | AREG | GO_BP |
| GO:0033687~osteoblast proliferation | 1 | 1/43 | 28/18012 | 0.064781 | 0.125759 | 14.96013 | ENSG00000055332 | EIF2AK2 | GO_BP |
| GO:0034698~response to gonadotropin | 1 | 1/43 | 28/18012 | 0.064781 | 0.125759 | 14.96013 | ENSG00000122641 | INHBA | GO_BP |
| GO:0035456~response to interferon-beta | 1 | 1/43 | 28/18012 | 0.064781 | 0.125759 | 14.96013 | ENSG00000130303 | BST2 | GO_BP |
| GO:0038111~interleukin-7-mediated signaling pathway | 1 | 1/43 | 28/18012 | 0.064781 | 0.125759 | 14.96013 | ENSG00000168685 | IL7R | GO_BP |
| GO:0044788~modulation by host of viral process | 1 | 1/43 | 28/18012 | 0.064781 | 0.125759 | 14.96013 | ENSG00000197081 | IGF2R | GO_BP |
| GO:0045577~regulation of B cell differentiation | 1 | 1/43 | 28/18012 | 0.064781 | 0.125759 | 14.96013 | ENSG00000122641 | INHBA | GO_BP |
| GO:0048520~positive regulation of behavior | 1 | 1/43 | 28/18012 | 0.064781 | 0.125759 | 14.96013 | ENSG00000119508 | NR4A3 | GO_BP |
| GO:1902668~negative regulation of axon guidance | 1 | 1/43 | 28/18012 | 0.064781 | 0.125759 | 14.96013 | ENSG00000145147 | SLIT2 | GO_BP |
| GO:2000108~positive regulation of leukocyte apoptotic process | 1 | 1/43 | 28/18012 | 0.064781 | 0.125759 | 14.96013 | ENSG00000119508 | NR4A3 | GO_BP |
| GO:0030323~respiratory tube development | 2 | 2/43 | 175/18012 | 0.065399 | 0.126702 | 4.787243 | ENSG00000128342/ENSG00000146648 | LIF/EGFR | GO_BP |
| GO:0060491~regulation of cell projection assembly | 2 | 2/43 | 175/18012 | 0.065399 | 0.126702 | 4.787243 | ENSG00000174775/ENSG00000145147 | HRAS/SLIT2 | GO_BP |
| GO:0001935~endothelial cell proliferation | 2 | 2/43 | 176/18012 | 0.066053 | 0.127582 | 4.760042 | ENSG00000106178/ENSG00000118257 | CCL24/NRP2 | GO_BP |
| GO:0008064~regulation of actin polymerization or depolymerization | 2 | 2/43 | 176/18012 | 0.066053 | 0.127582 | 4.760042 | ENSG00000106178/ENSG00000145147 | CCL24/SLIT2 | GO_BP |
| GO:0071346~cellular response to interferon-gamma | 2 | 2/43 | 176/18012 | 0.066053 | 0.127582 | 4.760042 | ENSG00000184557/ENSG00000106178 | SOCS3/CCL24 | GO_BP |
| GO:0030177~positive regulation of Wnt signaling pathway | 2 | 2/43 | 177/18012 | 0.066709 | 0.128154 | 4.733149 | ENSG00000118503/ENSG00000146648 | TNFAIP3/EGFR | GO_BP |
| GO:0030832~regulation of actin filament length | 2 | 2/43 | 177/18012 | 0.066709 | 0.128154 | 4.733149 | ENSG00000106178/ENSG00000145147 | CCL24/SLIT2 | GO_BP |
| GO:0050796~regulation of insulin secretion | 2 | 2/43 | 177/18012 | 0.066709 | 0.128154 | 4.733149 | ENSG00000139574/ENSG00000267281 | NPFF/AC023509.3 | GO_BP |
| GO:0007263~nitric oxide mediated signal transduction | 1 | 1/43 | 29/18012 | 0.067017 | 0.128154 | 14.44427 | ENSG00000146648 | EGFR | GO_BP |
| GO:0014912~negative regulation of smooth muscle cell migration | 1 | 1/43 | 29/18012 | 0.067017 | 0.128154 | 14.44427 | ENSG00000145147 | SLIT2 | GO_BP |
| GO:0021602~cranial nerve morphogenesis | 1 | 1/43 | 29/18012 | 0.067017 | 0.128154 | 14.44427 | ENSG00000118257 | NRP2 | GO_BP |
| GO:0043372~positive regulation of CD4-positive, alpha-beta T cell differentiation | 1 | 1/43 | 29/18012 | 0.067017 | 0.128154 | 14.44427 | ENSG00000144802 | NFKBIZ | GO_BP |
| GO:0070723~response to cholesterol | 1 | 1/43 | 29/18012 | 0.067017 | 0.128154 | 14.44427 | ENSG00000122641 | INHBA | GO_BP |
| GO:1900027~regulation of ruffle assembly | 1 | 1/43 | 29/18012 | 0.067017 | 0.128154 | 14.44427 | ENSG00000174775 | HRAS | GO_BP |
| GO:1902624~positive regulation of neutrophil migration | 1 | 1/43 | 29/18012 | 0.067017 | 0.128154 | 14.44427 | ENSG00000180871 | CXCR2 | GO_BP |
| GO:0038061~NIK/NF-kappaB signaling | 2 | 2/43 | 178/18012 | 0.067368 | 0.128568 | 4.706559 | ENSG00000055332/ENSG00000146648 | EIF2AK2/EGFR | GO_BP |
| GO:0071347~cellular response to interleukin-1 | 2 | 2/43 | 178/18012 | 0.067368 | 0.128568 | 4.706559 | ENSG00000106178/ENSG00000136244 | CCL24/IL6 | GO_BP |
| GO:0030041~actin filament polymerization | 2 | 2/43 | 179/18012 | 0.068028 | 0.129571 | 4.680265 | ENSG00000106178/ENSG00000145147 | CCL24/SLIT2 | GO_BP |
| GO:0048015~phosphatidylinositol-mediated signaling | 2 | 2/43 | 179/18012 | 0.068028 | 0.129571 | 4.680265 | ENSG00000146648/ENSG00000187266 | EGFR/EPOR | GO_BP |
| GO:0002285~lymphocyte activation involved in immune response | 2 | 2/43 | 180/18012 | 0.068691 | 0.129705 | 4.654264 | ENSG00000144802/ENSG00000136244 | NFKBIZ/IL6 | GO_BP |
| GO:0010565~regulation of cellular ketone metabolic process | 2 | 2/43 | 180/18012 | 0.068691 | 0.129705 | 4.654264 | ENSG00000073756/ENSG00000119508 | PTGS2/NR4A3 | GO_BP |
| GO:0002828~regulation of type 2 immune response | 1 | 1/43 | 30/18012 | 0.069248 | 0.129705 | 13.96279 | ENSG00000136244 | IL6 | GO_BP |
| GO:0010586~miRNA metabolic process | 1 | 1/43 | 30/18012 | 0.069248 | 0.129705 | 13.96279 | ENSG00000174775 | HRAS | GO_BP |
| GO:0021772~olfactory bulb development | 1 | 1/43 | 30/18012 | 0.069248 | 0.129705 | 13.96279 | ENSG00000145147 | SLIT2 | GO_BP |
| GO:0035066~positive regulation of histone acetylation | 1 | 1/43 | 30/18012 | 0.069248 | 0.129705 | 13.96279 | ENSG00000128342 | LIF | GO_BP |
| GO:0042759~long-chain fatty acid biosynthetic process | 1 | 1/43 | 30/18012 | 0.069248 | 0.129705 | 13.96279 | ENSG00000073756 | PTGS2 | GO_BP |
| GO:0045737~positive regulation of cyclin-dependent protein serine/threonine kinase activity | 1 | 1/43 | 30/18012 | 0.069248 | 0.129705 | 13.96279 | ENSG00000146648 | EGFR | GO_BP |
| GO:0046320~regulation of fatty acid oxidation | 1 | 1/43 | 30/18012 | 0.069248 | 0.129705 | 13.96279 | ENSG00000119508 | NR4A3 | GO_BP |
| GO:0046640~regulation of alpha-beta T cell proliferation | 1 | 1/43 | 30/18012 | 0.069248 | 0.129705 | 13.96279 | ENSG00000157873 | TNFRSF14 | GO_BP |
| GO:0048240~sperm capacitation | 1 | 1/43 | 30/18012 | 0.069248 | 0.129705 | 13.96279 | ENSG00000164825 | DEFB1 | GO_BP |
| GO:0050690~regulation of defense response to virus by virus | 1 | 1/43 | 30/18012 | 0.069248 | 0.129705 | 13.96279 | ENSG00000055332 | EIF2AK2 | GO_BP |
| GO:0071480~cellular response to gamma radiation | 1 | 1/43 | 30/18012 | 0.069248 | 0.129705 | 13.96279 | ENSG00000174775 | HRAS | GO_BP |
| GO:0071549~cellular response to dexamethasone stimulus | 1 | 1/43 | 30/18012 | 0.069248 | 0.129705 | 13.96279 | ENSG00000146648 | EGFR | GO_BP |
| GO:0090314~positive regulation of protein targeting to membrane | 1 | 1/43 | 30/18012 | 0.069248 | 0.129705 | 13.96279 | ENSG00000174775 | HRAS | GO_BP |
| GO:0097421~liver regeneration | 1 | 1/43 | 30/18012 | 0.069248 | 0.129705 | 13.96279 | ENSG00000146648 | EGFR | GO_BP |
| GO:1902253~regulation of intrinsic apoptotic signaling pathway by p53 class mediator | 1 | 1/43 | 30/18012 | 0.069248 | 0.129705 | 13.96279 | ENSG00000240972 | MIF | GO_BP |
| GO:0048017~inositol lipid-mediated signaling | 2 | 2/43 | 182/18012 | 0.070023 | 0.131029 | 4.603118 | ENSG00000146648/ENSG00000187266 | EGFR/EPOR | GO_BP |
| GO:0042098~T cell proliferation | 2 | 2/43 | 183/18012 | 0.070693 | 0.131561 | 4.577964 | ENSG00000136244/ENSG00000157873 | IL6/TNFRSF14 | GO_BP |
| GO:0046328~regulation of JNK cascade | 2 | 2/43 | 183/18012 | 0.070693 | 0.131561 | 4.577964 | ENSG00000174775/ENSG00000146648 | HRAS/EGFR | GO_BP |
| GO:0007369~gastrulation | 2 | 2/43 | 184/18012 | 0.071364 | 0.131561 | 4.553084 | ENSG00000122641/ENSG00000119508 | INHBA/NR4A3 | GO_BP |
| GO:0001963~synaptic transmission, dopaminergic | 1 | 1/43 | 31/18012 | 0.071474 | 0.131561 | 13.51238 | ENSG00000073756 | PTGS2 | GO_BP |
| GO:0002724~regulation of T cell cytokine production | 1 | 1/43 | 31/18012 | 0.071474 | 0.131561 | 13.51238 | ENSG00000136244 | IL6 | GO_BP |
| GO:0003401~axis elongation | 1 | 1/43 | 31/18012 | 0.071474 | 0.131561 | 13.51238 | ENSG00000109321 | AREG | GO_BP |
| GO:0007202~activation of phospholipase C activity | 1 | 1/43 | 31/18012 | 0.071474 | 0.131561 | 13.51238 | ENSG00000146648 | EGFR | GO_BP |
| GO:0021988~olfactory lobe development | 1 | 1/43 | 31/18012 | 0.071474 | 0.131561 | 13.51238 | ENSG00000145147 | SLIT2 | GO_BP |
| GO:0033198~response to ATP | 1 | 1/43 | 31/18012 | 0.071474 | 0.131561 | 13.51238 | ENSG00000073756 | PTGS2 | GO_BP |
| GO:0040020~regulation of meiotic nuclear division | 1 | 1/43 | 31/18012 | 0.071474 | 0.131561 | 13.51238 | ENSG00000128342 | LIF | GO_BP |
| GO:0045589~regulation of regulatory T cell differentiation | 1 | 1/43 | 31/18012 | 0.071474 | 0.131561 | 13.51238 | ENSG00000101096 | NFATC2 | GO_BP |
| GO:0045736~negative regulation of cyclin-dependent protein serine/threonine kinase activity | 1 | 1/43 | 31/18012 | 0.071474 | 0.131561 | 13.51238 | ENSG00000118503 | TNFAIP3 | GO_BP |
| GO:0045987~positive regulation of smooth muscle contraction | 1 | 1/43 | 31/18012 | 0.071474 | 0.131561 | 13.51238 | ENSG00000073756 | PTGS2 | GO_BP |
| GO:0050482~arachidonic acid secretion | 1 | 1/43 | 31/18012 | 0.071474 | 0.131561 | 13.51238 | ENSG00000240972 | MIF | GO_BP |
| GO:1902230~negative regulation of intrinsic apoptotic signaling pathway in response to DNA damage | 1 | 1/43 | 31/18012 | 0.071474 | 0.131561 | 13.51238 | ENSG00000240972 | MIF | GO_BP |
| GO:1903963~arachidonate transport | 1 | 1/43 | 31/18012 | 0.071474 | 0.131561 | 13.51238 | ENSG00000240972 | MIF | GO_BP |
| GO:2000406~positive regulation of T cell migration | 1 | 1/43 | 31/18012 | 0.071474 | 0.131561 | 13.51238 | ENSG00000157873 | TNFRSF14 | GO_BP |
| GO:1905475~regulation of protein localization to membrane | 2 | 2/43 | 186/18012 | 0.072713 | 0.133714 | 4.504126 | ENSG00000174775/ENSG00000146648 | HRAS/EGFR | GO_BP |
| GO:0019216~regulation of lipid metabolic process | 3 | 3/43 | 409/18012 | 0.073661 | 0.133977 | 3.072497 | ENSG00000184557/ENSG00000073756/ENSG00000119508 | SOCS3/PTGS2/NR4A3 | GO_BP |
| GO:0001914~regulation of T cell mediated cytotoxicity | 1 | 1/43 | 32/18012 | 0.073694 | 0.133977 | 13.09012 | ENSG00000168685 | IL7R | GO_BP |
| GO:0003176~aortic valve development | 1 | 1/43 | 32/18012 | 0.073694 | 0.133977 | 13.09012 | ENSG00000145147 | SLIT2 | GO_BP |
| GO:0003338~metanephros morphogenesis | 1 | 1/43 | 32/18012 | 0.073694 | 0.133977 | 13.09012 | ENSG00000128342 | LIF | GO_BP |
| GO:0010591~regulation of lamellipodium assembly | 1 | 1/43 | 32/18012 | 0.073694 | 0.133977 | 13.09012 | ENSG00000145147 | SLIT2 | GO_BP |
| GO:0010837~regulation of keratinocyte proliferation | 1 | 1/43 | 32/18012 | 0.073694 | 0.133977 | 13.09012 | ENSG00000109321 | AREG | GO_BP |
| GO:0032691~negative regulation of interleukin-1 beta production | 1 | 1/43 | 32/18012 | 0.073694 | 0.133977 | 13.09012 | ENSG00000118503 | TNFAIP3 | GO_BP |
| GO:0038128~ERBB2 signaling pathway | 1 | 1/43 | 32/18012 | 0.073694 | 0.133977 | 13.09012 | ENSG00000146648 | EGFR | GO_BP |
| GO:0060674~placenta blood vessel development | 1 | 1/43 | 32/18012 | 0.073694 | 0.133977 | 13.09012 | ENSG00000184557 | SOCS3 | GO_BP |
| GO:0070207~protein homotrimerization | 1 | 1/43 | 32/18012 | 0.073694 | 0.133977 | 13.09012 | ENSG00000240972 | MIF | GO_BP |
| GO:1901797~negative regulation of signal transduction by p53 class mediator | 1 | 1/43 | 32/18012 | 0.073694 | 0.133977 | 13.09012 | ENSG00000240972 | MIF | GO_BP |
| GO:1904030~negative regulation of cyclin-dependent protein kinase activity | 1 | 1/43 | 32/18012 | 0.073694 | 0.133977 | 13.09012 | ENSG00000118503 | TNFAIP3 | GO_BP |
| GO:0048167~regulation of synaptic plasticity | 2 | 2/43 | 188/18012 | 0.074071 | 0.134407 | 4.45621 | ENSG00000073756/ENSG00000174775 | PTGS2/HRAS | GO_BP |
| GO:2000377~regulation of reactive oxygen species metabolic process | 2 | 2/43 | 188/18012 | 0.074071 | 0.134407 | 4.45621 | ENSG00000073756/ENSG00000146648 | PTGS2/EGFR | GO_BP |
| GO:0019362~pyridine nucleotide metabolic process | 2 | 2/43 | 189/18012 | 0.074753 | 0.13526 | 4.432632 | ENSG00000073756/ENSG00000105835 | PTGS2/NAMPT | GO_BP |
| GO:0046496~nicotinamide nucleotide metabolic process | 2 | 2/43 | 189/18012 | 0.074753 | 0.13526 | 4.432632 | ENSG00000073756/ENSG00000105835 | PTGS2/NAMPT | GO_BP |
| GO:0071248~cellular response to metal ion | 2 | 2/43 | 189/18012 | 0.074753 | 0.13526 | 4.432632 | ENSG00000073756/ENSG00000146648 | PTGS2/EGFR | GO_BP |
| GO:0000737~DNA catabolic process, endonucleolytic | 1 | 1/43 | 33/18012 | 0.075909 | 0.135689 | 12.69345 | ENSG00000136244 | IL6 | GO_BP |
| GO:0010661~positive regulation of muscle cell apoptotic process | 1 | 1/43 | 33/18012 | 0.075909 | 0.135689 | 12.69345 | ENSG00000180871 | CXCR2 | GO_BP |
| GO:0010737~protein kinase A signaling | 1 | 1/43 | 33/18012 | 0.075909 | 0.135689 | 12.69345 | ENSG00000240972 | MIF | GO_BP |
| GO:0032660~regulation of interleukin-17 production | 1 | 1/43 | 33/18012 | 0.075909 | 0.135689 | 12.69345 | ENSG00000136244 | IL6 | GO_BP |
| GO:0032689~negative regulation of interferon-gamma production | 1 | 1/43 | 33/18012 | 0.075909 | 0.135689 | 12.69345 | ENSG00000122641 | INHBA | GO_BP |
| GO:0036314~response to sterol | 1 | 1/43 | 33/18012 | 0.075909 | 0.135689 | 12.69345 | ENSG00000122641 | INHBA | GO_BP |
| GO:0045066~regulatory T cell differentiation | 1 | 1/43 | 33/18012 | 0.075909 | 0.135689 | 12.69345 | ENSG00000101096 | NFATC2 | GO_BP |
| GO:0046633~alpha-beta T cell proliferation | 1 | 1/43 | 33/18012 | 0.075909 | 0.135689 | 12.69345 | ENSG00000157873 | TNFRSF14 | GO_BP |
| GO:0060603~mammary gland duct morphogenesis | 1 | 1/43 | 33/18012 | 0.075909 | 0.135689 | 12.69345 | ENSG00000109321 | AREG | GO_BP |
| GO:0070232~regulation of T cell apoptotic process | 1 | 1/43 | 33/18012 | 0.075909 | 0.135689 | 12.69345 | ENSG00000168685 | IL7R | GO_BP |
| GO:0070536~protein K63-linked deubiquitination | 1 | 1/43 | 33/18012 | 0.075909 | 0.135689 | 12.69345 | ENSG00000118503 | TNFAIP3 | GO_BP |
| GO:1901031~regulation of response to reactive oxygen species | 1 | 1/43 | 33/18012 | 0.075909 | 0.135689 | 12.69345 | ENSG00000119508 | NR4A3 | GO_BP |
| GO:2000758~positive regulation of peptidyl-lysine acetylation | 1 | 1/43 | 33/18012 | 0.075909 | 0.135689 | 12.69345 | ENSG00000128342 | LIF | GO_BP |
| GO:0043112~receptor metabolic process | 2 | 2/43 | 191/18012 | 0.076123 | 0.135943 | 4.386217 | ENSG00000163464/ENSG00000180871 | CXCR1/CXCR2 | GO_BP |
| GO:1901654~response to ketone | 2 | 2/43 | 193/18012 | 0.077501 | 0.137588 | 4.340764 | ENSG00000145147/ENSG00000146648 | SLIT2/EGFR | GO_BP |
| GO:0007435~salivary gland morphogenesis | 1 | 1/43 | 34/18012 | 0.07812 | 0.137588 | 12.32011 | ENSG00000146648 | EGFR | GO_BP |
| GO:0030262~apoptotic nuclear changes | 1 | 1/43 | 34/18012 | 0.07812 | 0.137588 | 12.32011 | ENSG00000136244 | IL6 | GO_BP |
| GO:0032892~positive regulation of organic acid transport | 1 | 1/43 | 34/18012 | 0.07812 | 0.137588 | 12.32011 | ENSG00000240972 | MIF | GO_BP |
| GO:0043368~positive T cell selection | 1 | 1/43 | 34/18012 | 0.07812 | 0.137588 | 12.32011 | ENSG00000136244 | IL6 | GO_BP |
| GO:0043516~regulation of DNA damage response, signal transduction by p53 class mediator | 1 | 1/43 | 34/18012 | 0.07812 | 0.137588 | 12.32011 | ENSG00000240972 | MIF | GO_BP |
| GO:0045622~regulation of T-helper cell differentiation | 1 | 1/43 | 34/18012 | 0.07812 | 0.137588 | 12.32011 | ENSG00000144802 | NFKBIZ | GO_BP |
| GO:0060251~regulation of glial cell proliferation | 1 | 1/43 | 34/18012 | 0.07812 | 0.137588 | 12.32011 | ENSG00000136244 | IL6 | GO_BP |
| GO:0070050~neuron cellular homeostasis | 1 | 1/43 | 34/18012 | 0.07812 | 0.137588 | 12.32011 | ENSG00000136244 | IL6 | GO_BP |
| GO:0071868~cellular response to monoamine stimulus | 1 | 1/43 | 34/18012 | 0.07812 | 0.137588 | 12.32011 | ENSG00000119508 | NR4A3 | GO_BP |
| GO:0071870~cellular response to catecholamine stimulus | 1 | 1/43 | 34/18012 | 0.07812 | 0.137588 | 12.32011 | ENSG00000119508 | NR4A3 | GO_BP |
| GO:0090050~positive regulation of cell migration involved in sprouting angiogenesis | 1 | 1/43 | 34/18012 | 0.07812 | 0.137588 | 12.32011 | ENSG00000073756 | PTGS2 | GO_BP |
| GO:0090322~regulation of superoxide metabolic process | 1 | 1/43 | 34/18012 | 0.07812 | 0.137588 | 12.32011 | ENSG00000146648 | EGFR | GO_BP |
| GO:0097009~energy homeostasis | 1 | 1/43 | 34/18012 | 0.07812 | 0.137588 | 12.32011 | ENSG00000119508 | NR4A3 | GO_BP |
| GO:1904031~positive regulation of cyclin-dependent protein kinase activity | 1 | 1/43 | 34/18012 | 0.07812 | 0.137588 | 12.32011 | ENSG00000146648 | EGFR | GO_BP |
| GO:0072524~pyridine-containing compound metabolic process | 2 | 2/43 | 195/18012 | 0.078887 | 0.138812 | 4.296243 | ENSG00000073756/ENSG00000105835 | PTGS2/NAMPT | GO_BP |
| GO:0060541~respiratory system development | 2 | 2/43 | 197/18012 | 0.080281 | 0.139171 | 4.252627 | ENSG00000128342/ENSG00000146648 | LIF/EGFR | GO_BP |
| GO:0002701~negative regulation of production of molecular mediator of immune response | 1 | 1/43 | 35/18012 | 0.080325 | 0.139171 | 11.96811 | ENSG00000130303 | BST2 | GO_BP |
| GO:0010613~positive regulation of cardiac muscle hypertrophy | 1 | 1/43 | 35/18012 | 0.080325 | 0.139171 | 11.96811 | ENSG00000119508 | NR4A3 | GO_BP |
| GO:0014904~myotube cell development | 1 | 1/43 | 35/18012 | 0.080325 | 0.139171 | 11.96811 | ENSG00000101096 | NFATC2 | GO_BP |
| GO:0021955~central nervous system neuron axonogenesis | 1 | 1/43 | 35/18012 | 0.080325 | 0.139171 | 11.96811 | ENSG00000145147 | SLIT2 | GO_BP |
| GO:0034142~toll-like receptor 4 signaling pathway | 1 | 1/43 | 35/18012 | 0.080325 | 0.139171 | 11.96811 | ENSG00000118503 | TNFAIP3 | GO_BP |
| GO:0034405~response to fluid shear stress | 1 | 1/43 | 35/18012 | 0.080325 | 0.139171 | 11.96811 | ENSG00000073756 | PTGS2 | GO_BP |
| GO:0035886~vascular smooth muscle cell differentiation | 1 | 1/43 | 35/18012 | 0.080325 | 0.139171 | 11.96811 | ENSG00000101096 | NFATC2 | GO_BP |
| GO:0042092~type 2 immune response | 1 | 1/43 | 35/18012 | 0.080325 | 0.139171 | 11.96811 | ENSG00000136244 | IL6 | GO_BP |
| GO:0048333~mesodermal cell differentiation | 1 | 1/43 | 35/18012 | 0.080325 | 0.139171 | 11.96811 | ENSG00000122641 | INHBA | GO_BP |
| GO:0071108~protein K48-linked deubiquitination | 1 | 1/43 | 35/18012 | 0.080325 | 0.139171 | 11.96811 | ENSG00000118503 | TNFAIP3 | GO_BP |
| GO:1903539~protein localization to postsynaptic membrane | 1 | 1/43 | 35/18012 | 0.080325 | 0.139171 | 11.96811 | ENSG00000174775 | HRAS | GO_BP |
| GO:1904037~positive regulation of epithelial cell apoptotic process | 1 | 1/43 | 35/18012 | 0.080325 | 0.139171 | 11.96811 | ENSG00000136244 | IL6 | GO_BP |
| GO:1904738~vascular associated smooth muscle cell migration | 1 | 1/43 | 35/18012 | 0.080325 | 0.139171 | 11.96811 | ENSG00000119508 | NR4A3 | GO_BP |
| GO:1904752~regulation of vascular associated smooth muscle cell migration | 1 | 1/43 | 35/18012 | 0.080325 | 0.139171 | 11.96811 | ENSG00000119508 | NR4A3 | GO_BP |
| GO:1905332~positive regulation of morphogenesis of an epithelium | 1 | 1/43 | 35/18012 | 0.080325 | 0.139171 | 11.96811 | ENSG00000128342 | LIF | GO_BP |
| GO:2000516~positive regulation of CD4-positive, alpha-beta T cell activation | 1 | 1/43 | 35/18012 | 0.080325 | 0.139171 | 11.96811 | ENSG00000144802 | NFKBIZ | GO_BP |
| GO:0051090~regulation of DNA-binding transcription factor activity | 3 | 3/43 | 426/18012 | 0.081007 | 0.140227 | 2.949885 | ENSG00000118503/ENSG00000055332/ENSG00000136244 | TNFAIP3/EIF2AK2/IL6 | GO_BP |
| GO:0009746~response to hexose | 2 | 2/43 | 200/18012 | 0.082386 | 0.140945 | 4.188837 | ENSG00000073756/ENSG00000105835 | PTGS2/NAMPT | GO_BP |
| GO:0002385~mucosal immune response | 1 | 1/43 | 36/18012 | 0.082524 | 0.140945 | 11.63566 | ENSG00000164825 | DEFB1 | GO_BP |
| GO:0006921~cellular component disassembly involved in execution phase of apoptosis | 1 | 1/43 | 36/18012 | 0.082524 | 0.140945 | 11.63566 | ENSG00000136244 | IL6 | GO_BP |
| GO:0014742~positive regulation of muscle hypertrophy | 1 | 1/43 | 36/18012 | 0.082524 | 0.140945 | 11.63566 | ENSG00000119508 | NR4A3 | GO_BP |
| GO:0042554~superoxide anion generation | 1 | 1/43 | 36/18012 | 0.082524 | 0.140945 | 11.63566 | ENSG00000146648 | EGFR | GO_BP |
| GO:0046627~negative regulation of insulin receptor signaling pathway | 1 | 1/43 | 36/18012 | 0.082524 | 0.140945 | 11.63566 | ENSG00000184557 | SOCS3 | GO_BP |
| GO:0048009~insulin-like growth factor receptor signaling pathway | 1 | 1/43 | 36/18012 | 0.082524 | 0.140945 | 11.63566 | ENSG00000197081 | IGF2R | GO_BP |
| GO:0070423~nucleotide-binding oligomerization domain containing signaling pathway | 1 | 1/43 | 36/18012 | 0.082524 | 0.140945 | 11.63566 | ENSG00000118503 | TNFAIP3 | GO_BP |
| GO:0071276~cellular response to cadmium ion | 1 | 1/43 | 36/18012 | 0.082524 | 0.140945 | 11.63566 | ENSG00000146648 | EGFR | GO_BP |
| GO:0071392~cellular response to estradiol stimulus | 1 | 1/43 | 36/18012 | 0.082524 | 0.140945 | 11.63566 | ENSG00000146648 | EGFR | GO_BP |
| GO:0071634~regulation of transforming growth factor beta production | 1 | 1/43 | 36/18012 | 0.082524 | 0.140945 | 11.63566 | ENSG00000073756 | PTGS2 | GO_BP |
| GO:0090313~regulation of protein targeting to membrane | 1 | 1/43 | 36/18012 | 0.082524 | 0.140945 | 11.63566 | ENSG00000174775 | HRAS | GO_BP |
| GO:1900117~regulation of execution phase of apoptosis | 1 | 1/43 | 36/18012 | 0.082524 | 0.140945 | 11.63566 | ENSG00000136244 | IL6 | GO_BP |
| GO:1901385~regulation of voltage-gated calcium channel activity | 1 | 1/43 | 36/18012 | 0.082524 | 0.140945 | 11.63566 | ENSG00000124942 | AHNAK | GO_BP |
| GO:1902742~apoptotic process involved in development | 1 | 1/43 | 36/18012 | 0.082524 | 0.140945 | 11.63566 | ENSG00000145147 | SLIT2 | GO_BP |
| GO:0002573~myeloid leukocyte differentiation | 2 | 2/43 | 202/18012 | 0.083799 | 0.142912 | 4.147364 | ENSG00000122641/ENSG00000128342 | INHBA/LIF | GO_BP |
| GO:0060249~anatomical structure homeostasis | 3 | 3/43 | 434/18012 | 0.084572 | 0.142912 | 2.89551 | ENSG00000118503/ENSG00000136244/ENSG00000146648 | TNFAIP3/IL6/EGFR | GO_BP |
| GO:0007431~salivary gland development | 1 | 1/43 | 37/18012 | 0.084719 | 0.142912 | 11.32118 | ENSG00000146648 | EGFR | GO_BP |
| GO:0032620~interleukin-17 production | 1 | 1/43 | 37/18012 | 0.084719 | 0.142912 | 11.32118 | ENSG00000136244 | IL6 | GO_BP |
| GO:0033280~response to vitamin D | 1 | 1/43 | 37/18012 | 0.084719 | 0.142912 | 11.32118 | ENSG00000073756 | PTGS2 | GO_BP |
| GO:0035872~nucleotide-binding domain, leucine rich repeat containing receptor signaling pathway | 1 | 1/43 | 37/18012 | 0.084719 | 0.142912 | 11.32118 | ENSG00000118503 | TNFAIP3 | GO_BP |
| GO:0038083~peptidyl-tyrosine autophosphorylation | 1 | 1/43 | 37/18012 | 0.084719 | 0.142912 | 11.32118 | ENSG00000146648 | EGFR | GO_BP |
| GO:0042307~positive regulation of protein import into nucleus | 1 | 1/43 | 37/18012 | 0.084719 | 0.142912 | 11.32118 | ENSG00000073756 | PTGS2 | GO_BP |
| GO:0050691~regulation of defense response to virus by host | 1 | 1/43 | 37/18012 | 0.084719 | 0.142912 | 11.32118 | ENSG00000118503 | TNFAIP3 | GO_BP |
| GO:1900026~positive regulation of substrate adhesion-dependent cell spreading | 1 | 1/43 | 37/18012 | 0.084719 | 0.142912 | 11.32118 | ENSG00000171560 | FGA | GO_BP |
| GO:1905314~semi-lunar valve development | 1 | 1/43 | 37/18012 | 0.084719 | 0.142912 | 11.32118 | ENSG00000145147 | SLIT2 | GO_BP |
| GO:1905521~regulation of macrophage migration | 1 | 1/43 | 37/18012 | 0.084719 | 0.142912 | 11.32118 | ENSG00000240972 | MIF | GO_BP |
| GO:2000249~regulation of actin cytoskeleton reorganization | 1 | 1/43 | 37/18012 | 0.084719 | 0.142912 | 11.32118 | ENSG00000174775 | HRAS | GO_BP |
| GO:2000403~positive regulation of lymphocyte migration | 1 | 1/43 | 37/18012 | 0.084719 | 0.142912 | 11.32118 | ENSG00000157873 | TNFRSF14 | GO_BP |
| GO:0031396~regulation of protein ubiquitination | 2 | 2/43 | 205/18012 | 0.085933 | 0.144571 | 4.08667 | ENSG00000187608/ENSG00000118503 | ISG15/TNFAIP3 | GO_BP |
| GO:0034284~response to monosaccharide | 2 | 2/43 | 205/18012 | 0.085933 | 0.144571 | 4.08667 | ENSG00000073756/ENSG00000105835 | PTGS2/NAMPT | GO_BP |
| GO:0070555~response to interleukin-1 | 2 | 2/43 | 205/18012 | 0.085933 | 0.144571 | 4.08667 | ENSG00000106178/ENSG00000136244 | CCL24/IL6 | GO_BP |
| GO:0001667~ameboidal-type cell migration | 3 | 3/43 | 438/18012 | 0.08638 | 0.144571 | 2.869067 | ENSG00000073756/ENSG00000145147/ENSG00000118257 | PTGS2/SLIT2/NRP2 | GO_BP |
| GO:0008154~actin polymerization or depolymerization | 2 | 2/43 | 206/18012 | 0.086648 | 0.144571 | 4.066832 | ENSG00000106178/ENSG00000145147 | CCL24/SLIT2 | GO_BP |
| GO:0002707~negative regulation of lymphocyte mediated immunity | 1 | 1/43 | 38/18012 | 0.086909 | 0.144571 | 11.02326 | ENSG00000168685 | IL7R | GO_BP |
| GO:0032692~negative regulation of interleukin-1 production | 1 | 1/43 | 38/18012 | 0.086909 | 0.144571 | 11.02326 | ENSG00000118503 | TNFAIP3 | GO_BP |
| GO:0034105~positive regulation of tissue remodeling | 1 | 1/43 | 38/18012 | 0.086909 | 0.144571 | 11.02326 | ENSG00000146648 | EGFR | GO_BP |
| GO:0046636~negative regulation of alpha-beta T cell activation | 1 | 1/43 | 38/18012 | 0.086909 | 0.144571 | 11.02326 | ENSG00000157873 | TNFRSF14 | GO_BP |
| GO:0048246~macrophage chemotaxis | 1 | 1/43 | 38/18012 | 0.086909 | 0.144571 | 11.02326 | ENSG00000240972 | MIF | GO_BP |
| GO:0071604~transforming growth factor beta production | 1 | 1/43 | 38/18012 | 0.086909 | 0.144571 | 11.02326 | ENSG00000073756 | PTGS2 | GO_BP |
| GO:0071867~response to monoamine | 1 | 1/43 | 38/18012 | 0.086909 | 0.144571 | 11.02326 | ENSG00000119508 | NR4A3 | GO_BP |
| GO:0071869~response to catecholamine | 1 | 1/43 | 38/18012 | 0.086909 | 0.144571 | 11.02326 | ENSG00000119508 | NR4A3 | GO_BP |
| GO:0098760~response to interleukin-7 | 1 | 1/43 | 38/18012 | 0.086909 | 0.144571 | 11.02326 | ENSG00000168685 | IL7R | GO_BP |
| GO:0098761~cellular response to interleukin-7 | 1 | 1/43 | 38/18012 | 0.086909 | 0.144571 | 11.02326 | ENSG00000168685 | IL7R | GO_BP |
| GO:1900077~negative regulation of cellular response to insulin stimulus | 1 | 1/43 | 38/18012 | 0.086909 | 0.144571 | 11.02326 | ENSG00000184557 | SOCS3 | GO_BP |
| GO:0006733~oxidoreduction coenzyme metabolic process | 2 | 2/43 | 207/18012 | 0.087365 | 0.145079 | 4.047186 | ENSG00000073756/ENSG00000105835 | PTGS2/NAMPT | GO_BP |
| GO:0007623~circadian rhythm | 2 | 2/43 | 207/18012 | 0.087365 | 0.145079 | 4.047186 | ENSG00000105835/ENSG00000146648 | NAMPT/EGFR | GO_BP |
| GO:0030073~insulin secretion | 2 | 2/43 | 208/18012 | 0.088084 | 0.146146 | 4.027728 | ENSG00000139574/ENSG00000267281 | NPFF/AC023509.3 | GO_BP |
| GO:0019048~modulation by virus of host morphology or physiology | 1 | 1/43 | 39/18012 | 0.089093 | 0.146931 | 10.74061 | ENSG00000055332 | EIF2AK2 | GO_BP |
| GO:0030501~positive regulation of bone mineralization | 1 | 1/43 | 39/18012 | 0.089093 | 0.146931 | 10.74061 | ENSG00000187608 | ISG15 | GO_BP |
| GO:0032965~regulation of collagen biosynthetic process | 1 | 1/43 | 39/18012 | 0.089093 | 0.146931 | 10.74061 | ENSG00000136244 | IL6 | GO_BP |
| GO:0034122~negative regulation of toll-like receptor signaling pathway | 1 | 1/43 | 39/18012 | 0.089093 | 0.146931 | 10.74061 | ENSG00000118503 | TNFAIP3 | GO_BP |
| GO:1902229~regulation of intrinsic apoptotic signaling pathway in response to DNA damage | 1 | 1/43 | 39/18012 | 0.089093 | 0.146931 | 10.74061 | ENSG00000240972 | MIF | GO_BP |
| GO:1903053~regulation of extracellular matrix organization | 1 | 1/43 | 39/18012 | 0.089093 | 0.146931 | 10.74061 | ENSG00000136244 | IL6 | GO_BP |
| GO:1904591~positive regulation of protein import | 1 | 1/43 | 39/18012 | 0.089093 | 0.146931 | 10.74061 | ENSG00000073756 | PTGS2 | GO_BP |
| GO:1901215~negative regulation of neuron death | 2 | 2/43 | 210/18012 | 0.089526 | 0.147518 | 3.989369 | ENSG00000174775/ENSG00000119508 | HRAS/NR4A3 | GO_BP |
| GO:0036294~cellular response to decreased oxygen levels | 2 | 2/43 | 211/18012 | 0.09025 | 0.148456 | 3.970462 | ENSG00000073756/ENSG00000105835 | PTGS2/NAMPT | GO_BP |
| GO:0043523~regulation of neuron apoptotic process | 2 | 2/43 | 211/18012 | 0.09025 | 0.148456 | 3.970462 | ENSG00000174775/ENSG00000119508 | HRAS/NR4A3 | GO_BP |
| GO:0001974~blood vessel remodeling | 1 | 1/43 | 40/18012 | 0.091272 | 0.148861 | 10.47209 | ENSG00000128342 | LIF | GO_BP |
| GO:0002369~T cell cytokine production | 1 | 1/43 | 40/18012 | 0.091272 | 0.148861 | 10.47209 | ENSG00000136244 | IL6 | GO_BP |
| GO:0002823~negative regulation of adaptive immune response based on somatic recombination of immune receptors built from immunoglobulin superfamily domains | 1 | 1/43 | 40/18012 | 0.091272 | 0.148861 | 10.47209 | ENSG00000168685 | IL7R | GO_BP |
| GO:0006308~DNA catabolic process | 1 | 1/43 | 40/18012 | 0.091272 | 0.148861 | 10.47209 | ENSG00000136244 | IL6 | GO_BP |
| GO:0050832~defense response to fungus | 1 | 1/43 | 40/18012 | 0.091272 | 0.148861 | 10.47209 | ENSG00000115523 | GNLY | GO_BP |
| GO:0071470~cellular response to osmotic stress | 1 | 1/43 | 40/18012 | 0.091272 | 0.148861 | 10.47209 | ENSG00000073756 | PTGS2 | GO_BP |
| GO:0071526~semaphorin-plexin signaling pathway | 1 | 1/43 | 40/18012 | 0.091272 | 0.148861 | 10.47209 | ENSG00000118257 | NRP2 | GO_BP |
| GO:0071548~response to dexamethasone | 1 | 1/43 | 40/18012 | 0.091272 | 0.148861 | 10.47209 | ENSG00000146648 | EGFR | GO_BP |
| GO:0072210~metanephric nephron development | 1 | 1/43 | 40/18012 | 0.091272 | 0.148861 | 10.47209 | ENSG00000128342 | LIF | GO_BP |
| GO:0090184~positive regulation of kidney development | 1 | 1/43 | 40/18012 | 0.091272 | 0.148861 | 10.47209 | ENSG00000128342 | LIF | GO_BP |
| GO:0007265~Ras protein signal transduction | 3 | 3/43 | 449/18012 | 0.091437 | 0.149003 | 2.798778 | ENSG00000174775/ENSG00000187266/ENSG00000213658 | HRAS/EPOR/LAT | GO_BP |
| GO:0007254~JNK cascade | 2 | 2/43 | 213/18012 | 0.091704 | 0.149184 | 3.93318 | ENSG00000174775/ENSG00000146648 | HRAS/EGFR | GO_BP |
| GO:2001020~regulation of response to DNA damage stimulus | 2 | 2/43 | 213/18012 | 0.091704 | 0.149184 | 3.93318 | ENSG00000240972/ENSG00000146648 | MIF/EGFR | GO_BP |
| GO:0015893~drug transport | 2 | 2/43 | 214/18012 | 0.092433 | 0.150116 | 3.914801 | ENSG00000122641/ENSG00000104918 | INHBA/RETN | GO_BP |
| GO:0032388~positive regulation of intracellular transport | 2 | 2/43 | 214/18012 | 0.092433 | 0.150116 | 3.914801 | ENSG00000073756/ENSG00000174775 | PTGS2/HRAS | GO_BP |
| GO:0032271~regulation of protein polymerization | 2 | 2/43 | 215/18012 | 0.093164 | 0.151122 | 3.896593 | ENSG00000106178/ENSG00000145147 | CCL24/SLIT2 | GO_BP |
| GO:0019985~translesion synthesis | 1 | 1/43 | 41/18012 | 0.093447 | 0.151122 | 10.21668 | ENSG00000187608 | ISG15 | GO_BP |
| GO:0048286~lung alveolus development | 1 | 1/43 | 41/18012 | 0.093447 | 0.151122 | 10.21668 | ENSG00000128342 | LIF | GO_BP |
| GO:0050873~brown fat cell differentiation | 1 | 1/43 | 41/18012 | 0.093447 | 0.151122 | 10.21668 | ENSG00000073756 | PTGS2 | GO_BP |
| GO:0097178~ruffle assembly | 1 | 1/43 | 41/18012 | 0.093447 | 0.151122 | 10.21668 | ENSG00000174775 | HRAS | GO_BP |
| GO:0048762~mesenchymal cell differentiation | 2 | 2/43 | 216/18012 | 0.093897 | 0.151594 | 3.878553 | ENSG00000136244/ENSG00000118257 | IL6/NRP2 | GO_BP |
| GO:0071241~cellular response to inorganic substance | 2 | 2/43 | 216/18012 | 0.093897 | 0.151594 | 3.878553 | ENSG00000073756/ENSG00000146648 | PTGS2/EGFR | GO_BP |
| GO:0001649~osteoblast differentiation | 2 | 2/43 | 217/18012 | 0.094631 | 0.152652 | 3.860679 | ENSG00000136244/ENSG00000109321 | IL6/AREG | GO_BP |
| GO:0002639~positive regulation of immunoglobulin production | 1 | 1/43 | 42/18012 | 0.095616 | 0.153337 | 9.973422 | ENSG00000136244 | IL6 | GO_BP |
| GO:0043616~keratinocyte proliferation | 1 | 1/43 | 42/18012 | 0.095616 | 0.153337 | 9.973422 | ENSG00000109321 | AREG | GO_BP |
| GO:0045429~positive regulation of nitric oxide biosynthetic process | 1 | 1/43 | 42/18012 | 0.095616 | 0.153337 | 9.973422 | ENSG00000073756 | PTGS2 | GO_BP |
| GO:0045687~positive regulation of glial cell differentiation | 1 | 1/43 | 42/18012 | 0.095616 | 0.153337 | 9.973422 | ENSG00000128342 | LIF | GO_BP |
| GO:0051150~regulation of smooth muscle cell differentiation | 1 | 1/43 | 42/18012 | 0.095616 | 0.153337 | 9.973422 | ENSG00000101096 | NFATC2 | GO_BP |
| GO:1901985~positive regulation of protein acetylation | 1 | 1/43 | 42/18012 | 0.095616 | 0.153337 | 9.973422 | ENSG00000128342 | LIF | GO_BP |
| GO:1904646~cellular response to amyloid-beta | 1 | 1/43 | 42/18012 | 0.095616 | 0.153337 | 9.973422 | ENSG00000105835 | NAMPT | GO_BP |
| GO:0007584~response to nutrient | 2 | 2/43 | 219/18012 | 0.096105 | 0.153993 | 3.825422 | ENSG00000073756/ENSG00000146648 | PTGS2/EGFR | GO_BP |
| GO:0043254~regulation of protein complex assembly | 3 | 3/43 | 461/18012 | 0.097094 | 0.154993 | 2.725924 | ENSG00000055332/ENSG00000106178/ENSG00000145147 | EIF2AK2/CCL24/SLIT2 | GO_BP |
| GO:0010828~positive regulation of glucose transmembrane transport | 1 | 1/43 | 43/18012 | 0.09778 | 0.154993 | 9.741482 | ENSG00000119508 | NR4A3 | GO_BP |
| GO:0014911~positive regulation of smooth muscle cell migration | 1 | 1/43 | 43/18012 | 0.09778 | 0.154993 | 9.741482 | ENSG00000119508 | NR4A3 | GO_BP |
| GO:0032924~activin receptor signaling pathway | 1 | 1/43 | 43/18012 | 0.09778 | 0.154993 | 9.741482 | ENSG00000122641 | INHBA | GO_BP |
| GO:0033003~regulation of mast cell activation | 1 | 1/43 | 43/18012 | 0.09778 | 0.154993 | 9.741482 | ENSG00000119508 | NR4A3 | GO_BP |
| GO:0033173~calcineurin-NFAT signaling cascade | 1 | 1/43 | 43/18012 | 0.09778 | 0.154993 | 9.741482 | ENSG00000101096 | NFATC2 | GO_BP |
| GO:0034198~cellular response to amino acid starvation | 1 | 1/43 | 43/18012 | 0.09778 | 0.154993 | 9.741482 | ENSG00000055332 | EIF2AK2 | GO_BP |
| GO:0038084~vascular endothelial growth factor signaling pathway | 1 | 1/43 | 43/18012 | 0.09778 | 0.154993 | 9.741482 | ENSG00000118257 | NRP2 | GO_BP |
| GO:0042088~T-helper 1 type immune response | 1 | 1/43 | 43/18012 | 0.09778 | 0.154993 | 9.741482 | ENSG00000174775 | HRAS | GO_BP |
| GO:0045746~negative regulation of Notch signaling pathway | 1 | 1/43 | 43/18012 | 0.09778 | 0.154993 | 9.741482 | ENSG00000146648 | EGFR | GO_BP |
| GO:0060412~ventricular septum morphogenesis | 1 | 1/43 | 43/18012 | 0.09778 | 0.154993 | 9.741482 | ENSG00000145147 | SLIT2 | GO_BP |
| GO:0071364~cellular response to epidermal growth factor stimulus | 1 | 1/43 | 43/18012 | 0.09778 | 0.154993 | 9.741482 | ENSG00000146648 | EGFR | GO_BP |
| GO:1904407~positive regulation of nitric oxide metabolic process | 1 | 1/43 | 43/18012 | 0.09778 | 0.154993 | 9.741482 | ENSG00000073756 | PTGS2 | GO_BP |
| GO:0051495~positive regulation of cytoskeleton organization | 2 | 2/43 | 222/18012 | 0.098329 | 0.155735 | 3.773727 | ENSG00000106178/ENSG00000174775 | CCL24/HRAS | GO_BP |
| GO:0033157~regulation of intracellular protein transport | 2 | 2/43 | 223/18012 | 0.099074 | 0.156785 | 3.756805 | ENSG00000073756/ENSG00000174775 | PTGS2/HRAS | GO_BP |
| GO:0010712~regulation of collagen metabolic process | 1 | 1/43 | 44/18012 | 0.099939 | 0.157504 | 9.520085 | ENSG00000136244 | IL6 | GO_BP |
| GO:0035850~epithelial cell differentiation involved in kidney development | 1 | 1/43 | 44/18012 | 0.099939 | 0.157504 | 9.520085 | ENSG00000128342 | LIF | GO_BP |
| GO:1902667~regulation of axon guidance | 1 | 1/43 | 44/18012 | 0.099939 | 0.157504 | 9.520085 | ENSG00000145147 | SLIT2 | GO_BP |
| GO:1902743~regulation of lamellipodium organization | 1 | 1/43 | 44/18012 | 0.099939 | 0.157504 | 9.520085 | ENSG00000145147 | SLIT2 | GO_BP |
| GO:2000404~regulation of T cell migration | 1 | 1/43 | 44/18012 | 0.099939 | 0.157504 | 9.520085 | ENSG00000157873 | TNFRSF14 | GO_BP |
| GO:0006469~negative regulation of protein kinase activity | 2 | 2/43 | 226/18012 | 0.101317 | 0.159069 | 3.706936 | ENSG00000184557/ENSG00000118503 | SOCS3/TNFAIP3 | GO_BP |
| GO:0050769~positive regulation of neurogenesis | 3 | 3/43 | 470/18012 | 0.10143 | 0.159069 | 2.673726 | ENSG00000136244/ENSG00000145147/ENSG00000128342 | IL6/SLIT2/LIF | GO_BP |
| GO:0048588~developmental cell growth | 2 | 2/43 | 227/18012 | 0.102068 | 0.159069 | 3.690605 | ENSG00000145147/ENSG00000118257 | SLIT2/NRP2 | GO_BP |
| GO:0002833~positive regulation of response to biotic stimulus | 1 | 1/43 | 45/18012 | 0.102093 | 0.159069 | 9.308527 | ENSG00000240972 | MIF | GO_BP |
| GO:0010665~regulation of cardiac muscle cell apoptotic process | 1 | 1/43 | 45/18012 | 0.102093 | 0.159069 | 9.308527 | ENSG00000180871 | CXCR2 | GO_BP |
| GO:0010883~regulation of lipid storage | 1 | 1/43 | 45/18012 | 0.102093 | 0.159069 | 9.308527 | ENSG00000136244 | IL6 | GO_BP |
| GO:0031018~endocrine pancreas development | 1 | 1/43 | 45/18012 | 0.102093 | 0.159069 | 9.308527 | ENSG00000136244 | IL6 | GO_BP |
| GO:0032309~icosanoid secretion | 1 | 1/43 | 45/18012 | 0.102093 | 0.159069 | 9.308527 | ENSG00000240972 | MIF | GO_BP |
| GO:0035987~endodermal cell differentiation | 1 | 1/43 | 45/18012 | 0.102093 | 0.159069 | 9.308527 | ENSG00000122641 | INHBA | GO_BP |
| GO:0042771~intrinsic apoptotic signaling pathway in response to DNA damage by p53 class mediator | 1 | 1/43 | 45/18012 | 0.102093 | 0.159069 | 9.308527 | ENSG00000240972 | MIF | GO_BP |
| GO:0048483~autonomic nervous system development | 1 | 1/43 | 45/18012 | 0.102093 | 0.159069 | 9.308527 | ENSG00000118257 | NRP2 | GO_BP |
| GO:0050706~regulation of interleukin-1 beta secretion | 1 | 1/43 | 45/18012 | 0.102093 | 0.159069 | 9.308527 | ENSG00000118503 | TNFAIP3 | GO_BP |
| GO:1903202~negative regulation of oxidative stress-induced cell death | 1 | 1/43 | 45/18012 | 0.102093 | 0.159069 | 9.308527 | ENSG00000119508 | NR4A3 | GO_BP |
| GO:1904707~positive regulation of vascular smooth muscle cell proliferation | 1 | 1/43 | 45/18012 | 0.102093 | 0.159069 | 9.308527 | ENSG00000119508 | NR4A3 | GO_BP |
| GO:0009743~response to carbohydrate | 2 | 2/43 | 228/18012 | 0.10282 | 0.159943 | 3.674419 | ENSG00000073756/ENSG00000105835 | PTGS2/NAMPT | GO_BP |
| GO:0071453~cellular response to oxygen levels | 2 | 2/43 | 228/18012 | 0.10282 | 0.159943 | 3.674419 | ENSG00000073756/ENSG00000105835 | PTGS2/NAMPT | GO_BP |
| GO:0043087~regulation of GTPase activity | 3 | 3/43 | 474/18012 | 0.103383 | 0.160205 | 2.651163 | ENSG00000106178/ENSG00000174775/ENSG00000145147 | CCL24/HRAS/SLIT2 | GO_BP |
| GO:0035196~production of miRNAs involved in gene silencing by miRNA | 1 | 1/43 | 46/18012 | 0.104242 | 0.160205 | 9.106168 | ENSG00000146648 | EGFR | GO_BP |
| GO:0043124~negative regulation of I-kappaB kinase/NF-kappaB signaling | 1 | 1/43 | 46/18012 | 0.104242 | 0.160205 | 9.106168 | ENSG00000118503 | TNFAIP3 | GO_BP |
| GO:0043370~regulation of CD4-positive, alpha-beta T cell differentiation | 1 | 1/43 | 46/18012 | 0.104242 | 0.160205 | 9.106168 | ENSG00000144802 | NFKBIZ | GO_BP |
| GO:0044003~modification by symbiont of host morphology or physiology | 1 | 1/43 | 46/18012 | 0.104242 | 0.160205 | 9.106168 | ENSG00000055332 | EIF2AK2 | GO_BP |
| GO:0045933~positive regulation of muscle contraction | 1 | 1/43 | 46/18012 | 0.104242 | 0.160205 | 9.106168 | ENSG00000073756 | PTGS2 | GO_BP |
| GO:0046638~positive regulation of alpha-beta T cell differentiation | 1 | 1/43 | 46/18012 | 0.104242 | 0.160205 | 9.106168 | ENSG00000144802 | NFKBIZ | GO_BP |
| GO:0060443~mammary gland morphogenesis | 1 | 1/43 | 46/18012 | 0.104242 | 0.160205 | 9.106168 | ENSG00000109321 | AREG | GO_BP |
| GO:0060711~labyrinthine layer development | 1 | 1/43 | 46/18012 | 0.104242 | 0.160205 | 9.106168 | ENSG00000184557 | SOCS3 | GO_BP |
| GO:0071675~regulation of mononuclear cell migration | 1 | 1/43 | 46/18012 | 0.104242 | 0.160205 | 9.106168 | ENSG00000145147 | SLIT2 | GO_BP |
| GO:0097720~calcineurin-mediated signaling | 1 | 1/43 | 46/18012 | 0.104242 | 0.160205 | 9.106168 | ENSG00000101096 | NFATC2 | GO_BP |
| GO:1900408~negative regulation of cellular response to oxidative stress | 1 | 1/43 | 46/18012 | 0.104242 | 0.160205 | 9.106168 | ENSG00000119508 | NR4A3 | GO_BP |
| GO:1990928~response to amino acid starvation | 1 | 1/43 | 46/18012 | 0.104242 | 0.160205 | 9.106168 | ENSG00000055332 | EIF2AK2 | GO_BP |
| GO:2000772~regulation of cellular senescence | 1 | 1/43 | 46/18012 | 0.104242 | 0.160205 | 9.106168 | ENSG00000105835 | NAMPT | GO_BP |
| GO:2001239~regulation of extrinsic apoptotic signaling pathway in absence of ligand | 1 | 1/43 | 46/18012 | 0.104242 | 0.160205 | 9.106168 | ENSG00000122641 | INHBA | GO_BP |
| GO:0031348~negative regulation of defense response | 2 | 2/43 | 231/18012 | 0.105087 | 0.161375 | 3.626699 | ENSG00000184557/ENSG00000118503 | SOCS3/TNFAIP3 | GO_BP |
| GO:1903320~regulation of protein modification by small protein conjugation or removal | 2 | 2/43 | 232/18012 | 0.105846 | 0.161943 | 3.611067 | ENSG00000187608/ENSG00000118503 | ISG15/TNFAIP3 | GO_BP |
| GO:0002711~positive regulation of T cell mediated immunity | 1 | 1/43 | 47/18012 | 0.106386 | 0.161943 | 8.91242 | ENSG00000136244 | IL6 | GO_BP |
| GO:0002832~negative regulation of response to biotic stimulus | 1 | 1/43 | 47/18012 | 0.106386 | 0.161943 | 8.91242 | ENSG00000118503 | TNFAIP3 | GO_BP |
| GO:0010662~regulation of striated muscle cell apoptotic process | 1 | 1/43 | 47/18012 | 0.106386 | 0.161943 | 8.91242 | ENSG00000180871 | CXCR2 | GO_BP |
| GO:0035722~interleukin-12-mediated signaling pathway | 1 | 1/43 | 47/18012 | 0.106386 | 0.161943 | 8.91242 | ENSG00000240972 | MIF | GO_BP |
| GO:0045058~T cell selection | 1 | 1/43 | 47/18012 | 0.106386 | 0.161943 | 8.91242 | ENSG00000136244 | IL6 | GO_BP |
| GO:0045668~negative regulation of osteoblast differentiation | 1 | 1/43 | 47/18012 | 0.106386 | 0.161943 | 8.91242 | ENSG00000109321 | AREG | GO_BP |
| GO:0070169~positive regulation of biomineral tissue development | 1 | 1/43 | 47/18012 | 0.106386 | 0.161943 | 8.91242 | ENSG00000187608 | ISG15 | GO_BP |
| GO:0070231~T cell apoptotic process | 1 | 1/43 | 47/18012 | 0.106386 | 0.161943 | 8.91242 | ENSG00000168685 | IL7R | GO_BP |
| GO:0070849~response to epidermal growth factor | 1 | 1/43 | 47/18012 | 0.106386 | 0.161943 | 8.91242 | ENSG00000146648 | EGFR | GO_BP |
| GO:0072666~establishment of protein localization to vacuole | 1 | 1/43 | 47/18012 | 0.106386 | 0.161943 | 8.91242 | ENSG00000118503 | TNFAIP3 | GO_BP |
| GO:0051896~regulation of protein kinase B signaling | 2 | 2/43 | 234/18012 | 0.107368 | 0.16318 | 3.580203 | ENSG00000109321/ENSG00000146648 | AREG/EGFR | GO_BP |
| GO:0097305~response to alcohol | 2 | 2/43 | 234/18012 | 0.107368 | 0.16318 | 3.580203 | ENSG00000145147/ENSG00000122641 | SLIT2/INHBA | GO_BP |
| GO:0043122~regulation of I-kappaB kinase/NF-kappaB signaling | 2 | 2/43 | 235/18012 | 0.108132 | 0.163769 | 3.564968 | ENSG00000118503/ENSG00000130303 | TNFAIP3/BST2 | GO_BP |
| GO:0046777~protein autophosphorylation | 2 | 2/43 | 235/18012 | 0.108132 | 0.163769 | 3.564968 | ENSG00000055332/ENSG00000146648 | EIF2AK2/EGFR | GO_BP |
| GO:0001913~T cell mediated cytotoxicity | 1 | 1/43 | 48/18012 | 0.108525 | 0.163769 | 8.726744 | ENSG00000168685 | IL7R | GO_BP |
| GO:0002762~negative regulation of myeloid leukocyte differentiation | 1 | 1/43 | 48/18012 | 0.108525 | 0.163769 | 8.726744 | ENSG00000122641 | INHBA | GO_BP |
| GO:0010659~cardiac muscle cell apoptotic process | 1 | 1/43 | 48/18012 | 0.108525 | 0.163769 | 8.726744 | ENSG00000180871 | CXCR2 | GO_BP |
| GO:0032964~collagen biosynthetic process | 1 | 1/43 | 48/18012 | 0.108525 | 0.163769 | 8.726744 | ENSG00000136244 | IL6 | GO_BP |
| GO:0035272~exocrine system development | 1 | 1/43 | 48/18012 | 0.108525 | 0.163769 | 8.726744 | ENSG00000146648 | EGFR | GO_BP |
| GO:1900087~positive regulation of G1/S transition of mitotic cell cycle | 1 | 1/43 | 48/18012 | 0.108525 | 0.163769 | 8.726744 | ENSG00000146648 | EGFR | GO_BP |
| GO:1902883~negative regulation of response to oxidative stress | 1 | 1/43 | 48/18012 | 0.108525 | 0.163769 | 8.726744 | ENSG00000119508 | NR4A3 | GO_BP |
| GO:0022604~regulation of cell morphogenesis | 3 | 3/43 | 485/18012 | 0.10883 | 0.1641 | 2.591033 | ENSG00000171560/ENSG00000106178/ENSG00000145147 | FGA/CCL24/SLIT2 | GO_BP |
| GO:0030258~lipid modification | 2 | 2/43 | 238/18012 | 0.110431 | 0.165556 | 3.520031 | ENSG00000184557/ENSG00000119508 | SOCS3/NR4A3 | GO_BP |
| GO:0010718~positive regulation of epithelial to mesenchymal transition | 1 | 1/43 | 49/18012 | 0.110658 | 0.165556 | 8.548647 | ENSG00000136244 | IL6 | GO_BP |
| GO:0010862~positive regulation of pathway-restricted SMAD protein phosphorylation | 1 | 1/43 | 49/18012 | 0.110658 | 0.165556 | 8.548647 | ENSG00000122641 | INHBA | GO_BP |
| GO:0048546~digestive tract morphogenesis | 1 | 1/43 | 49/18012 | 0.110658 | 0.165556 | 8.548647 | ENSG00000146648 | EGFR | GO_BP |
| GO:0051205~protein insertion into membrane | 1 | 1/43 | 49/18012 | 0.110658 | 0.165556 | 8.548647 | ENSG00000146648 | EGFR | GO_BP |
| GO:0051445~regulation of meiotic cell cycle | 1 | 1/43 | 49/18012 | 0.110658 | 0.165556 | 8.548647 | ENSG00000128342 | LIF | GO_BP |
| GO:0071349~cellular response to interleukin-12 | 1 | 1/43 | 49/18012 | 0.110658 | 0.165556 | 8.548647 | ENSG00000240972 | MIF | GO_BP |
| GO:0071715~icosanoid transport | 1 | 1/43 | 49/18012 | 0.110658 | 0.165556 | 8.548647 | ENSG00000240972 | MIF | GO_BP |
| GO:1901571~fatty acid derivative transport | 1 | 1/43 | 49/18012 | 0.110658 | 0.165556 | 8.548647 | ENSG00000240972 | MIF | GO_BP |
| GO:2001238~positive regulation of extrinsic apoptotic signaling pathway | 1 | 1/43 | 49/18012 | 0.110658 | 0.165556 | 8.548647 | ENSG00000122641 | INHBA | GO_BP |
| GO:0051402~neuron apoptotic process | 2 | 2/43 | 239/18012 | 0.1112 | 0.166236 | 3.505303 | ENSG00000174775/ENSG00000119508 | HRAS/NR4A3 | GO_BP |
| GO:0010951~negative regulation of endopeptidase activity | 2 | 2/43 | 240/18012 | 0.111971 | 0.167258 | 3.490698 | ENSG00000130303/ENSG00000073756 | BST2/PTGS2 | GO_BP |
| GO:0046578~regulation of Ras protein signal transduction | 2 | 2/43 | 241/18012 | 0.112743 | 0.167435 | 3.476213 | ENSG00000174775/ENSG00000187266 | HRAS/EPOR | GO_BP |
| GO:0001706~endoderm formation | 1 | 1/43 | 50/18012 | 0.112787 | 0.167435 | 8.377674 | ENSG00000122641 | INHBA | GO_BP |
| GO:0010658~striated muscle cell apoptotic process | 1 | 1/43 | 50/18012 | 0.112787 | 0.167435 | 8.377674 | ENSG00000180871 | CXCR2 | GO_BP |
| GO:0046854~phosphatidylinositol phosphorylation | 1 | 1/43 | 50/18012 | 0.112787 | 0.167435 | 8.377674 | ENSG00000184557 | SOCS3 | GO_BP |
| GO:0050999~regulation of nitric-oxide synthase activity | 1 | 1/43 | 50/18012 | 0.112787 | 0.167435 | 8.377674 | ENSG00000146648 | EGFR | GO_BP |
| GO:0060425~lung morphogenesis | 1 | 1/43 | 50/18012 | 0.112787 | 0.167435 | 8.377674 | ENSG00000128342 | LIF | GO_BP |
| GO:0070671~response to interleukin-12 | 1 | 1/43 | 50/18012 | 0.112787 | 0.167435 | 8.377674 | ENSG00000240972 | MIF | GO_BP |
| GO:1903793~positive regulation of anion transport | 1 | 1/43 | 50/18012 | 0.112787 | 0.167435 | 8.377674 | ENSG00000240972 | MIF | GO_BP |
| GO:0000731~DNA synthesis involved in DNA repair | 1 | 1/43 | 51/18012 | 0.114911 | 0.169408 | 8.213406 | ENSG00000187608 | ISG15 | GO_BP |
| GO:0019369~arachidonic acid metabolic process | 1 | 1/43 | 51/18012 | 0.114911 | 0.169408 | 8.213406 | ENSG00000073756 | PTGS2 | GO_BP |
| GO:0021545~cranial nerve development | 1 | 1/43 | 51/18012 | 0.114911 | 0.169408 | 8.213406 | ENSG00000118257 | NRP2 | GO_BP |
| GO:0031050~dsRNA processing | 1 | 1/43 | 51/18012 | 0.114911 | 0.169408 | 8.213406 | ENSG00000146648 | EGFR | GO_BP |
| GO:0032715~negative regulation of interleukin-6 production | 1 | 1/43 | 51/18012 | 0.114911 | 0.169408 | 8.213406 | ENSG00000118503 | TNFAIP3 | GO_BP |
| GO:0045599~negative regulation of fat cell differentiation | 1 | 1/43 | 51/18012 | 0.114911 | 0.169408 | 8.213406 | ENSG00000136244 | IL6 | GO_BP |
| GO:0050704~regulation of interleukin-1 secretion | 1 | 1/43 | 51/18012 | 0.114911 | 0.169408 | 8.213406 | ENSG00000118503 | TNFAIP3 | GO_BP |
| GO:0070918~production of small RNA involved in gene silencing by RNA | 1 | 1/43 | 51/18012 | 0.114911 | 0.169408 | 8.213406 | ENSG00000146648 | EGFR | GO_BP |
| GO:1905517~macrophage migration | 1 | 1/43 | 51/18012 | 0.114911 | 0.169408 | 8.213406 | ENSG00000240972 | MIF | GO_BP |
| GO:0008016~regulation of heart contraction | 2 | 2/43 | 245/18012 | 0.115845 | 0.170654 | 3.419459 | ENSG00000139574/ENSG00000267281 | NPFF/AC023509.3 | GO_BP |
| GO:0003179~heart valve morphogenesis | 1 | 1/43 | 52/18012 | 0.11703 | 0.170955 | 8.055456 | ENSG00000145147 | SLIT2 | GO_BP |
| GO:0006301~postreplication repair | 1 | 1/43 | 52/18012 | 0.11703 | 0.170955 | 8.055456 | ENSG00000187608 | ISG15 | GO_BP |
| GO:0009620~response to fungus | 1 | 1/43 | 52/18012 | 0.11703 | 0.170955 | 8.055456 | ENSG00000115523 | GNLY | GO_BP |
| GO:0030195~negative regulation of blood coagulation | 1 | 1/43 | 52/18012 | 0.11703 | 0.170955 | 8.055456 | ENSG00000171560 | FGA | GO_BP |
| GO:0031529~ruffle organization | 1 | 1/43 | 52/18012 | 0.11703 | 0.170955 | 8.055456 | ENSG00000174775 | HRAS | GO_BP |
| GO:0031638~zymogen activation | 1 | 1/43 | 52/18012 | 0.11703 | 0.170955 | 8.055456 | ENSG00000171560 | FGA | GO_BP |
| GO:0048168~regulation of neuronal synaptic plasticity | 1 | 1/43 | 52/18012 | 0.11703 | 0.170955 | 8.055456 | ENSG00000174775 | HRAS | GO_BP |
| GO:0050702~interleukin-1 beta secretion | 1 | 1/43 | 52/18012 | 0.11703 | 0.170955 | 8.055456 | ENSG00000118503 | TNFAIP3 | GO_BP |
| GO:0050732~negative regulation of peptidyl-tyrosine phosphorylation | 1 | 1/43 | 52/18012 | 0.11703 | 0.170955 | 8.055456 | ENSG00000184557 | SOCS3 | GO_BP |
| GO:1900024~regulation of substrate adhesion-dependent cell spreading | 1 | 1/43 | 52/18012 | 0.11703 | 0.170955 | 8.055456 | ENSG00000171560 | FGA | GO_BP |
| GO:2000677~regulation of transcription regulatory region DNA binding | 1 | 1/43 | 52/18012 | 0.11703 | 0.170955 | 8.055456 | ENSG00000128342 | LIF | GO_BP |
| GO:0002449~lymphocyte mediated immunity | 2 | 2/43 | 247/18012 | 0.117405 | 0.171242 | 3.391771 | ENSG00000168685/ENSG00000136244 | IL7R/IL6 | GO_BP |
| GO:0042180~cellular ketone metabolic process | 2 | 2/43 | 247/18012 | 0.117405 | 0.171242 | 3.391771 | ENSG00000073756/ENSG00000119508 | PTGS2/NR4A3 | GO_BP |
| GO:0033673~negative regulation of kinase activity | 2 | 2/43 | 248/18012 | 0.118187 | 0.17199 | 3.378095 | ENSG00000184557/ENSG00000118503 | SOCS3/TNFAIP3 | GO_BP |
| GO:0051924~regulation of calcium ion transport | 2 | 2/43 | 248/18012 | 0.118187 | 0.17199 | 3.378095 | ENSG00000124942/ENSG00000073756 | AHNAK/PTGS2 | GO_BP |
| GO:0090257~regulation of muscle system process | 2 | 2/43 | 248/18012 | 0.118187 | 0.17199 | 3.378095 | ENSG00000073756/ENSG00000119508 | PTGS2/NR4A3 | GO_BP |
| GO:0035065~regulation of histone acetylation | 1 | 1/43 | 53/18012 | 0.119144 | 0.172728 | 7.903466 | ENSG00000128342 | LIF | GO_BP |
| GO:0050885~neuromuscular process controlling balance | 1 | 1/43 | 53/18012 | 0.119144 | 0.172728 | 7.903466 | ENSG00000119508 | NR4A3 | GO_BP |
| GO:1900047~negative regulation of hemostasis | 1 | 1/43 | 53/18012 | 0.119144 | 0.172728 | 7.903466 | ENSG00000171560 | FGA | GO_BP |
| GO:1903428~positive regulation of reactive oxygen species biosynthetic process | 1 | 1/43 | 53/18012 | 0.119144 | 0.172728 | 7.903466 | ENSG00000073756 | PTGS2 | GO_BP |
| GO:1904645~response to amyloid-beta | 1 | 1/43 | 53/18012 | 0.119144 | 0.172728 | 7.903466 | ENSG00000105835 | NAMPT | GO_BP |
| GO:0010466~negative regulation of peptidase activity | 2 | 2/43 | 250/18012 | 0.119755 | 0.173351 | 3.35107 | ENSG00000130303/ENSG00000073756 | BST2/PTGS2 | GO_BP |
| GO:0071383~cellular response to steroid hormone stimulus | 2 | 2/43 | 250/18012 | 0.119755 | 0.173351 | 3.35107 | ENSG00000146648/ENSG00000119508 | EGFR/NR4A3 | GO_BP |
| GO:0002763~positive regulation of myeloid leukocyte differentiation | 1 | 1/43 | 54/18012 | 0.121253 | 0.174705 | 7.757106 | ENSG00000128342 | LIF | GO_BP |
| GO:0032663~regulation of interleukin-2 production | 1 | 1/43 | 54/18012 | 0.121253 | 0.174705 | 7.757106 | ENSG00000118503 | TNFAIP3 | GO_BP |
| GO:0045620~negative regulation of lymphocyte differentiation | 1 | 1/43 | 54/18012 | 0.121253 | 0.174705 | 7.757106 | ENSG00000122641 | INHBA | GO_BP |
| GO:0050819~negative regulation of coagulation | 1 | 1/43 | 54/18012 | 0.121253 | 0.174705 | 7.757106 | ENSG00000171560 | FGA | GO_BP |
| GO:0061005~cell differentiation involved in kidney development | 1 | 1/43 | 54/18012 | 0.121253 | 0.174705 | 7.757106 | ENSG00000128342 | LIF | GO_BP |
| GO:0070206~protein trimerization | 1 | 1/43 | 54/18012 | 0.121253 | 0.174705 | 7.757106 | ENSG00000240972 | MIF | GO_BP |
| GO:2000027~regulation of animal organ morphogenesis | 2 | 2/43 | 252/18012 | 0.121328 | 0.174705 | 3.324474 | ENSG00000118503/ENSG00000128342 | TNFAIP3/LIF | GO_BP |
| GO:0003007~heart morphogenesis | 2 | 2/43 | 254/18012 | 0.122906 | 0.176041 | 3.298297 | ENSG00000145147/ENSG00000118257 | SLIT2/NRP2 | GO_BP |
| GO:0001541~ovarian follicle development | 1 | 1/43 | 55/18012 | 0.123358 | 0.176041 | 7.616068 | ENSG00000122641 | INHBA | GO_BP |
| GO:0031295~T cell costimulation | 1 | 1/43 | 55/18012 | 0.123358 | 0.176041 | 7.616068 | ENSG00000157873 | TNFRSF14 | GO_BP |
| GO:0032613~interleukin-10 production | 1 | 1/43 | 55/18012 | 0.123358 | 0.176041 | 7.616068 | ENSG00000187608 | ISG15 | GO_BP |
| GO:0042304~regulation of fatty acid biosynthetic process | 1 | 1/43 | 55/18012 | 0.123358 | 0.176041 | 7.616068 | ENSG00000073756 | PTGS2 | GO_BP |
| GO:0042306~regulation of protein import into nucleus | 1 | 1/43 | 55/18012 | 0.123358 | 0.176041 | 7.616068 | ENSG00000073756 | PTGS2 | GO_BP |
| GO:0043551~regulation of phosphatidylinositol 3-kinase activity | 1 | 1/43 | 55/18012 | 0.123358 | 0.176041 | 7.616068 | ENSG00000184557 | SOCS3 | GO_BP |
| GO:0048016~inositol phosphate-mediated signaling | 1 | 1/43 | 55/18012 | 0.123358 | 0.176041 | 7.616068 | ENSG00000101096 | NFATC2 | GO_BP |
| GO:0097120~receptor localization to synapse | 1 | 1/43 | 55/18012 | 0.123358 | 0.176041 | 7.616068 | ENSG00000174775 | HRAS | GO_BP |
| GO:1903078~positive regulation of protein localization to plasma membrane | 1 | 1/43 | 55/18012 | 0.123358 | 0.176041 | 7.616068 | ENSG00000146648 | EGFR | GO_BP |
| GO:1905953~negative regulation of lipid localization | 1 | 1/43 | 55/18012 | 0.123358 | 0.176041 | 7.616068 | ENSG00000136244 | IL6 | GO_BP |
| GO:2000242~negative regulation of reproductive process | 1 | 1/43 | 55/18012 | 0.123358 | 0.176041 | 7.616068 | ENSG00000128342 | LIF | GO_BP |
| GO:0110053~regulation of actin filament organization | 2 | 2/43 | 256/18012 | 0.12449 | 0.177525 | 3.272529 | ENSG00000106178/ENSG00000145147 | CCL24/SLIT2 | GO_BP |
| GO:0010332~response to gamma radiation | 1 | 1/43 | 56/18012 | 0.125457 | 0.17811 | 7.480066 | ENSG00000174775 | HRAS | GO_BP |
| GO:0031294~lymphocyte costimulation | 1 | 1/43 | 56/18012 | 0.125457 | 0.17811 | 7.480066 | ENSG00000157873 | TNFRSF14 | GO_BP |
| GO:0048008~platelet-derived growth factor receptor signaling pathway | 1 | 1/43 | 56/18012 | 0.125457 | 0.17811 | 7.480066 | ENSG00000119508 | NR4A3 | GO_BP |
| GO:0048662~negative regulation of smooth muscle cell proliferation | 1 | 1/43 | 56/18012 | 0.125457 | 0.17811 | 7.480066 | ENSG00000118503 | TNFAIP3 | GO_BP |
| GO:0070936~protein K48-linked ubiquitination | 1 | 1/43 | 56/18012 | 0.125457 | 0.17811 | 7.480066 | ENSG00000118503 | TNFAIP3 | GO_BP |
| GO:0090183~regulation of kidney development | 1 | 1/43 | 56/18012 | 0.125457 | 0.17811 | 7.480066 | ENSG00000128342 | LIF | GO_BP |
| GO:0007611~learning or memory | 2 | 2/43 | 258/18012 | 0.126079 | 0.17886 | 3.247161 | ENSG00000073756/ENSG00000146648 | PTGS2/EGFR | GO_BP |
| GO:0043491~protein kinase B signaling | 2 | 2/43 | 259/18012 | 0.126875 | 0.179724 | 3.234623 | ENSG00000109321/ENSG00000146648 | AREG/EGFR | GO_BP |
| GO:0051091~positive regulation of DNA-binding transcription factor activity | 2 | 2/43 | 259/18012 | 0.126875 | 0.179724 | 3.234623 | ENSG00000055332/ENSG00000136244 | EIF2AK2/IL6 | GO_BP |
| GO:0001755~neural crest cell migration | 1 | 1/43 | 57/18012 | 0.127551 | 0.180149 | 7.348837 | ENSG00000118257 | NRP2 | GO_BP |
| GO:0042743~hydrogen peroxide metabolic process | 1 | 1/43 | 57/18012 | 0.127551 | 0.180149 | 7.348837 | ENSG00000146648 | EGFR | GO_BP |
| GO:0075733~intracellular transport of virus | 1 | 1/43 | 57/18012 | 0.127551 | 0.180149 | 7.348837 | ENSG00000130303 | BST2 | GO_BP |
| GO:1903672~positive regulation of sprouting angiogenesis | 1 | 1/43 | 57/18012 | 0.127551 | 0.180149 | 7.348837 | ENSG00000073756 | PTGS2 | GO_BP |
| GO:0009108~coenzyme biosynthetic process | 2 | 2/43 | 260/18012 | 0.127672 | 0.180188 | 3.222182 | ENSG00000073756/ENSG00000105835 | PTGS2/NAMPT | GO_BP |
| GO:0034504~protein localization to nucleus | 2 | 2/43 | 262/18012 | 0.129271 | 0.181895 | 3.197586 | ENSG00000073756/ENSG00000128342 | PTGS2/LIF | GO_BP |
| GO:0030837~negative regulation of actin filament polymerization | 1 | 1/43 | 58/18012 | 0.12964 | 0.181895 | 7.222133 | ENSG00000145147 | SLIT2 | GO_BP |
| GO:0045824~negative regulation of innate immune response | 1 | 1/43 | 58/18012 | 0.12964 | 0.181895 | 7.222133 | ENSG00000118503 | TNFAIP3 | GO_BP |
| GO:0050853~B cell receptor signaling pathway | 1 | 1/43 | 58/18012 | 0.12964 | 0.181895 | 7.222133 | ENSG00000101096 | NFATC2 | GO_BP |
| GO:0051058~negative regulation of small GTPase mediated signal transduction | 1 | 1/43 | 58/18012 | 0.12964 | 0.181895 | 7.222133 | ENSG00000145147 | SLIT2 | GO_BP |
| GO:0071385~cellular response to glucocorticoid stimulus | 1 | 1/43 | 58/18012 | 0.12964 | 0.181895 | 7.222133 | ENSG00000146648 | EGFR | GO_BP |
| GO:1902808~positive regulation of cell cycle G1/S phase transition | 1 | 1/43 | 58/18012 | 0.12964 | 0.181895 | 7.222133 | ENSG00000146648 | EGFR | GO_BP |
| GO:1904589~regulation of protein import | 1 | 1/43 | 58/18012 | 0.12964 | 0.181895 | 7.222133 | ENSG00000073756 | PTGS2 | GO_BP |
| GO:0010803~regulation of tumor necrosis factor-mediated signaling pathway | 1 | 1/43 | 59/18012 | 0.131725 | 0.183744 | 7.099724 | ENSG00000118503 | TNFAIP3 | GO_BP |
| GO:0032890~regulation of organic acid transport | 1 | 1/43 | 59/18012 | 0.131725 | 0.183744 | 7.099724 | ENSG00000240972 | MIF | GO_BP |
| GO:0042130~negative regulation of T cell proliferation | 1 | 1/43 | 59/18012 | 0.131725 | 0.183744 | 7.099724 | ENSG00000157873 | TNFRSF14 | GO_BP |
| GO:0050701~interleukin-1 secretion | 1 | 1/43 | 59/18012 | 0.131725 | 0.183744 | 7.099724 | ENSG00000118503 | TNFAIP3 | GO_BP |
| GO:0070527~platelet aggregation | 1 | 1/43 | 59/18012 | 0.131725 | 0.183744 | 7.099724 | ENSG00000171560 | FGA | GO_BP |
| GO:0090303~positive regulation of wound healing | 1 | 1/43 | 59/18012 | 0.131725 | 0.183744 | 7.099724 | ENSG00000174775 | HRAS | GO_BP |
| GO:0097755~positive regulation of blood vessel diameter | 1 | 1/43 | 59/18012 | 0.131725 | 0.183744 | 7.099724 | ENSG00000146648 | EGFR | GO_BP |
| GO:2000756~regulation of peptidyl-lysine acetylation | 1 | 1/43 | 59/18012 | 0.131725 | 0.183744 | 7.099724 | ENSG00000128342 | LIF | GO_BP |
| GO:0000082~G1/S transition of mitotic cell cycle | 2 | 2/43 | 267/18012 | 0.133288 | 0.185566 | 3.137706 | ENSG00000122641/ENSG00000146648 | INHBA/EGFR | GO_BP |
| GO:0007249~I-kappaB kinase/NF-kappaB signaling | 2 | 2/43 | 267/18012 | 0.133288 | 0.185566 | 3.137706 | ENSG00000118503/ENSG00000130303 | TNFAIP3/BST2 | GO_BP |
| GO:0043966~histone H3 acetylation | 1 | 1/43 | 60/18012 | 0.133805 | 0.185566 | 6.981395 | ENSG00000128342 | LIF | GO_BP |
| GO:0045669~positive regulation of osteoblast differentiation | 1 | 1/43 | 60/18012 | 0.133805 | 0.185566 | 6.981395 | ENSG00000136244 | IL6 | GO_BP |
| GO:0046794~transport of virus | 1 | 1/43 | 60/18012 | 0.133805 | 0.185566 | 6.981395 | ENSG00000130303 | BST2 | GO_BP |
| GO:0051784~negative regulation of nuclear division | 1 | 1/43 | 60/18012 | 0.133805 | 0.185566 | 6.981395 | ENSG00000128342 | LIF | GO_BP |
| GO:1905207~regulation of cardiocyte differentiation | 1 | 1/43 | 60/18012 | 0.133805 | 0.185566 | 6.981395 | ENSG00000146648 | EGFR | GO_BP |
| GO:2000514~regulation of CD4-positive, alpha-beta T cell activation | 1 | 1/43 | 60/18012 | 0.133805 | 0.185566 | 6.981395 | ENSG00000144802 | NFKBIZ | GO_BP |
| GO:0034113~heterotypic cell-cell adhesion | 1 | 1/43 | 61/18012 | 0.135879 | 0.1879 | 6.866946 | ENSG00000171560 | FGA | GO_BP |
| GO:0045600~positive regulation of fat cell differentiation | 1 | 1/43 | 61/18012 | 0.135879 | 0.1879 | 6.866946 | ENSG00000073756 | PTGS2 | GO_BP |
| GO:0046635~positive regulation of alpha-beta T cell activation | 1 | 1/43 | 61/18012 | 0.135879 | 0.1879 | 6.866946 | ENSG00000144802 | NFKBIZ | GO_BP |
| GO:0071384~cellular response to corticosteroid stimulus | 1 | 1/43 | 61/18012 | 0.135879 | 0.1879 | 6.866946 | ENSG00000146648 | EGFR | GO_BP |
| GO:0003170~heart valve development | 1 | 1/43 | 62/18012 | 0.137949 | 0.189261 | 6.756189 | ENSG00000145147 | SLIT2 | GO_BP |
| GO:0009880~embryonic pattern specification | 1 | 1/43 | 62/18012 | 0.137949 | 0.189261 | 6.756189 | ENSG00000118257 | NRP2 | GO_BP |
| GO:0032623~interleukin-2 production | 1 | 1/43 | 62/18012 | 0.137949 | 0.189261 | 6.756189 | ENSG00000118503 | TNFAIP3 | GO_BP |
| GO:0032768~regulation of monooxygenase activity | 1 | 1/43 | 62/18012 | 0.137949 | 0.189261 | 6.756189 | ENSG00000146648 | EGFR | GO_BP |
| GO:0032922~circadian regulation of gene expression | 1 | 1/43 | 62/18012 | 0.137949 | 0.189261 | 6.756189 | ENSG00000105835 | NAMPT | GO_BP |
| GO:0046637~regulation of alpha-beta T cell differentiation | 1 | 1/43 | 62/18012 | 0.137949 | 0.189261 | 6.756189 | ENSG00000144802 | NFKBIZ | GO_BP |
| GO:0046686~response to cadmium ion | 1 | 1/43 | 62/18012 | 0.137949 | 0.189261 | 6.756189 | ENSG00000146648 | EGFR | GO_BP |
| GO:0048247~lymphocyte chemotaxis | 1 | 1/43 | 62/18012 | 0.137949 | 0.189261 | 6.756189 | ENSG00000106178 | CCL24 | GO_BP |
| GO:0051926~negative regulation of calcium ion transport | 1 | 1/43 | 62/18012 | 0.137949 | 0.189261 | 6.756189 | ENSG00000073756 | PTGS2 | GO_BP |
| GO:1904377~positive regulation of protein localization to cell periphery | 1 | 1/43 | 62/18012 | 0.137949 | 0.189261 | 6.756189 | ENSG00000146648 | EGFR | GO_BP |
| GO:2000401~regulation of lymphocyte migration | 1 | 1/43 | 62/18012 | 0.137949 | 0.189261 | 6.756189 | ENSG00000157873 | TNFRSF14 | GO_BP |
| GO:0032868~response to insulin | 2 | 2/43 | 273/18012 | 0.138148 | 0.189397 | 3.068745 | ENSG00000184557/ENSG00000104918 | SOCS3/RETN | GO_BP |
| GO:0006260~DNA replication | 2 | 2/43 | 274/18012 | 0.138961 | 0.19019 | 3.057545 | ENSG00000174775/ENSG00000146648 | HRAS/EGFR | GO_BP |
| GO:0060047~heart contraction | 2 | 2/43 | 274/18012 | 0.138961 | 0.19019 | 3.057545 | ENSG00000139574/ENSG00000267281 | NPFF/AC023509.3 | GO_BP |
| GO:0060485~mesenchyme development | 2 | 2/43 | 275/18012 | 0.139776 | 0.19019 | 3.046427 | ENSG00000136244/ENSG00000118257 | IL6/NRP2 | GO_BP |
| GO:0002637~regulation of immunoglobulin production | 1 | 1/43 | 63/18012 | 0.140014 | 0.19019 | 6.648948 | ENSG00000136244 | IL6 | GO_BP |
| GO:0002753~cytoplasmic pattern recognition receptor signaling pathway | 1 | 1/43 | 63/18012 | 0.140014 | 0.19019 | 6.648948 | ENSG00000118503 | TNFAIP3 | GO_BP |
| GO:0006940~regulation of smooth muscle contraction | 1 | 1/43 | 63/18012 | 0.140014 | 0.19019 | 6.648948 | ENSG00000073756 | PTGS2 | GO_BP |
| GO:0031640~killing of cells of other organism | 1 | 1/43 | 63/18012 | 0.140014 | 0.19019 | 6.648948 | ENSG00000115523 | GNLY | GO_BP |
| GO:0035418~protein localization to synapse | 1 | 1/43 | 63/18012 | 0.140014 | 0.19019 | 6.648948 | ENSG00000174775 | HRAS | GO_BP |
| GO:0044364~disruption of cells of other organism | 1 | 1/43 | 63/18012 | 0.140014 | 0.19019 | 6.648948 | ENSG00000115523 | GNLY | GO_BP |
| GO:0045428~regulation of nitric oxide biosynthetic process | 1 | 1/43 | 63/18012 | 0.140014 | 0.19019 | 6.648948 | ENSG00000073756 | PTGS2 | GO_BP |
| GO:0046824~positive regulation of nucleocytoplasmic transport | 1 | 1/43 | 63/18012 | 0.140014 | 0.19019 | 6.648948 | ENSG00000073756 | PTGS2 | GO_BP |
| GO:0060393~regulation of pathway-restricted SMAD protein phosphorylation | 1 | 1/43 | 63/18012 | 0.140014 | 0.19019 | 6.648948 | ENSG00000122641 | INHBA | GO_BP |
| GO:1903201~regulation of oxidative stress-induced cell death | 1 | 1/43 | 63/18012 | 0.140014 | 0.19019 | 6.648948 | ENSG00000119508 | NR4A3 | GO_BP |
| GO:0051348~negative regulation of transferase activity | 2 | 2/43 | 277/18012 | 0.141409 | 0.191812 | 3.024431 | ENSG00000184557/ENSG00000118503 | SOCS3/TNFAIP3 | GO_BP |
| GO:0072593~reactive oxygen species metabolic process | 2 | 2/43 | 277/18012 | 0.141409 | 0.191812 | 3.024431 | ENSG00000073756/ENSG00000146648 | PTGS2/EGFR | GO_BP |
| GO:0032729~positive regulation of interferon-gamma production | 1 | 1/43 | 64/18012 | 0.142075 | 0.192036 | 6.545058 | ENSG00000174775 | HRAS | GO_BP |
| GO:0043550~regulation of lipid kinase activity | 1 | 1/43 | 64/18012 | 0.142075 | 0.192036 | 6.545058 | ENSG00000184557 | SOCS3 | GO_BP |
| GO:0046834~lipid phosphorylation | 1 | 1/43 | 64/18012 | 0.142075 | 0.192036 | 6.545058 | ENSG00000184557 | SOCS3 | GO_BP |
| GO:0051148~negative regulation of muscle cell differentiation | 1 | 1/43 | 64/18012 | 0.142075 | 0.192036 | 6.545058 | ENSG00000101096 | NFATC2 | GO_BP |
| GO:0072665~protein localization to vacuole | 1 | 1/43 | 64/18012 | 0.142075 | 0.192036 | 6.545058 | ENSG00000118503 | TNFAIP3 | GO_BP |
| GO:0010611~regulation of cardiac muscle hypertrophy | 1 | 1/43 | 65/18012 | 0.14413 | 0.193858 | 6.444365 | ENSG00000119508 | NR4A3 | GO_BP |
| GO:0030032~lamellipodium assembly | 1 | 1/43 | 65/18012 | 0.14413 | 0.193858 | 6.444365 | ENSG00000145147 | SLIT2 | GO_BP |
| GO:0030858~positive regulation of epithelial cell differentiation | 1 | 1/43 | 65/18012 | 0.14413 | 0.193858 | 6.444365 | ENSG00000128342 | LIF | GO_BP |
| GO:0045739~positive regulation of DNA repair | 1 | 1/43 | 65/18012 | 0.14413 | 0.193858 | 6.444365 | ENSG00000146648 | EGFR | GO_BP |
| GO:0048207~vesicle targeting, rough ER to cis-Golgi | 1 | 1/43 | 65/18012 | 0.14413 | 0.193858 | 6.444365 | ENSG00000109321 | AREG | GO_BP |
| GO:0048208~COPII vesicle coating | 1 | 1/43 | 65/18012 | 0.14413 | 0.193858 | 6.444365 | ENSG00000109321 | AREG | GO_BP |
| GO:0072678~T cell migration | 1 | 1/43 | 65/18012 | 0.14413 | 0.193858 | 6.444365 | ENSG00000157873 | TNFRSF14 | GO_BP |
| GO:0030522~intracellular receptor signaling pathway | 2 | 2/43 | 281/18012 | 0.144688 | 0.194472 | 2.981379 | ENSG00000118503/ENSG00000119508 | TNFAIP3/NR4A3 | GO_BP |
| GO:0035924~cellular response to vascular endothelial growth factor stimulus | 1 | 1/43 | 66/18012 | 0.146181 | 0.195929 | 6.346723 | ENSG00000118257 | NRP2 | GO_BP |
| GO:0046626~regulation of insulin receptor signaling pathway | 1 | 1/43 | 66/18012 | 0.146181 | 0.195929 | 6.346723 | ENSG00000184557 | SOCS3 | GO_BP |
| GO:0060389~pathway-restricted SMAD protein phosphorylation | 1 | 1/43 | 66/18012 | 0.146181 | 0.195929 | 6.346723 | ENSG00000122641 | INHBA | GO_BP |
| GO:0099072~regulation of postsynaptic membrane neurotransmitter receptor levels | 1 | 1/43 | 66/18012 | 0.146181 | 0.195929 | 6.346723 | ENSG00000174775 | HRAS | GO_BP |
| GO:0003015~heart process | 2 | 2/43 | 284/18012 | 0.147158 | 0.196963 | 2.949885 | ENSG00000139574/ENSG00000267281 | NPFF/AC023509.3 | GO_BP |
| GO:0051146~striated muscle cell differentiation | 2 | 2/43 | 284/18012 | 0.147158 | 0.196963 | 2.949885 | ENSG00000101096/ENSG00000161055 | NFATC2/SCGB3A1 | GO_BP |
| GO:0044843~cell cycle G1/S phase transition | 2 | 2/43 | 285/18012 | 0.147983 | 0.197704 | 2.939535 | ENSG00000122641/ENSG00000146648 | INHBA/EGFR | GO_BP |
| GO:0019915~lipid storage | 1 | 1/43 | 67/18012 | 0.148226 | 0.197704 | 6.251996 | ENSG00000136244 | IL6 | GO_BP |
| GO:0034121~regulation of toll-like receptor signaling pathway | 1 | 1/43 | 67/18012 | 0.148226 | 0.197704 | 6.251996 | ENSG00000118503 | TNFAIP3 | GO_BP |
| GO:0042108~positive regulation of cytokine biosynthetic process | 1 | 1/43 | 67/18012 | 0.148226 | 0.197704 | 6.251996 | ENSG00000136244 | IL6 | GO_BP |
| GO:0072091~regulation of stem cell proliferation | 1 | 1/43 | 67/18012 | 0.148226 | 0.197704 | 6.251996 | ENSG00000055332 | EIF2AK2 | GO_BP |
| GO:0014743~regulation of muscle hypertrophy | 1 | 1/43 | 68/18012 | 0.150268 | 0.200009 | 6.160055 | ENSG00000119508 | NR4A3 | GO_BP |
| GO:0051145~smooth muscle cell differentiation | 1 | 1/43 | 68/18012 | 0.150268 | 0.200009 | 6.160055 | ENSG00000101096 | NFATC2 | GO_BP |
| GO:0071230~cellular response to amino acid stimulus | 1 | 1/43 | 68/18012 | 0.150268 | 0.200009 | 6.160055 | ENSG00000146648 | EGFR | GO_BP |
| GO:0006901~vesicle coating | 1 | 1/43 | 69/18012 | 0.152304 | 0.202018 | 6.070779 | ENSG00000109321 | AREG | GO_BP |
| GO:0015909~long-chain fatty acid transport | 1 | 1/43 | 69/18012 | 0.152304 | 0.202018 | 6.070779 | ENSG00000240972 | MIF | GO_BP |
| GO:0032720~negative regulation of tumor necrosis factor production | 1 | 1/43 | 69/18012 | 0.152304 | 0.202018 | 6.070779 | ENSG00000118503 | TNFAIP3 | GO_BP |
| GO:0050771~negative regulation of axonogenesis | 1 | 1/43 | 69/18012 | 0.152304 | 0.202018 | 6.070779 | ENSG00000145147 | SLIT2 | GO_BP |
| GO:0050918~positive chemotaxis | 1 | 1/43 | 69/18012 | 0.152304 | 0.202018 | 6.070779 | ENSG00000240972 | MIF | GO_BP |
| GO:0050768~negative regulation of neurogenesis | 2 | 2/43 | 292/18012 | 0.153787 | 0.203845 | 2.869067 | ENSG00000136244/ENSG00000145147 | IL6/SLIT2 | GO_BP |
| GO:0033077~T cell differentiation in thymus | 1 | 1/43 | 70/18012 | 0.154335 | 0.204148 | 5.984053 | ENSG00000168685 | IL7R | GO_BP |
| GO:0050710~negative regulation of cytokine secretion | 1 | 1/43 | 70/18012 | 0.154335 | 0.204148 | 5.984053 | ENSG00000118503 | TNFAIP3 | GO_BP |
| GO:0070373~negative regulation of ERK1 and ERK2 cascade | 1 | 1/43 | 70/18012 | 0.154335 | 0.204148 | 5.984053 | ENSG00000128342 | LIF | GO_BP |
| GO:0006801~superoxide metabolic process | 1 | 1/43 | 71/18012 | 0.156362 | 0.205553 | 5.899771 | ENSG00000146648 | EGFR | GO_BP |
| GO:0038034~signal transduction in absence of ligand | 1 | 1/43 | 71/18012 | 0.156362 | 0.205553 | 5.899771 | ENSG00000122641 | INHBA | GO_BP |
| GO:0050805~negative regulation of synaptic transmission | 1 | 1/43 | 71/18012 | 0.156362 | 0.205553 | 5.899771 | ENSG00000073756 | PTGS2 | GO_BP |
| GO:0060395~SMAD protein signal transduction | 1 | 1/43 | 71/18012 | 0.156362 | 0.205553 | 5.899771 | ENSG00000122641 | INHBA | GO_BP |
| GO:0090049~regulation of cell migration involved in sprouting angiogenesis | 1 | 1/43 | 71/18012 | 0.156362 | 0.205553 | 5.899771 | ENSG00000073756 | PTGS2 | GO_BP |
| GO:0090114~COPII-coated vesicle budding | 1 | 1/43 | 71/18012 | 0.156362 | 0.205553 | 5.899771 | ENSG00000109321 | AREG | GO_BP |
| GO:0097192~extrinsic apoptotic signaling pathway in absence of ligand | 1 | 1/43 | 71/18012 | 0.156362 | 0.205553 | 5.899771 | ENSG00000122641 | INHBA | GO_BP |
| GO:1903036~positive regulation of response to wounding | 1 | 1/43 | 71/18012 | 0.156362 | 0.205553 | 5.899771 | ENSG00000174775 | HRAS | GO_BP |
| GO:1903556~negative regulation of tumor necrosis factor superfamily cytokine production | 1 | 1/43 | 71/18012 | 0.156362 | 0.205553 | 5.899771 | ENSG00000118503 | TNFAIP3 | GO_BP |
| GO:0032272~negative regulation of protein polymerization | 1 | 1/43 | 72/18012 | 0.158384 | 0.207359 | 5.817829 | ENSG00000145147 | SLIT2 | GO_BP |
| GO:0061180~mammary gland epithelium development | 1 | 1/43 | 72/18012 | 0.158384 | 0.207359 | 5.817829 | ENSG00000109321 | AREG | GO_BP |
| GO:1901983~regulation of protein acetylation | 1 | 1/43 | 72/18012 | 0.158384 | 0.207359 | 5.817829 | ENSG00000128342 | LIF | GO_BP |
| GO:1902036~regulation of hematopoietic stem cell differentiation | 1 | 1/43 | 72/18012 | 0.158384 | 0.207359 | 5.817829 | ENSG00000055332 | EIF2AK2 | GO_BP |
| GO:1904705~regulation of vascular smooth muscle cell proliferation | 1 | 1/43 | 72/18012 | 0.158384 | 0.207359 | 5.817829 | ENSG00000119508 | NR4A3 | GO_BP |
| GO:1990874~vascular smooth muscle cell proliferation | 1 | 1/43 | 72/18012 | 0.158384 | 0.207359 | 5.817829 | ENSG00000119508 | NR4A3 | GO_BP |
| GO:0050890~cognition | 2 | 2/43 | 298/18012 | 0.158798 | 0.207759 | 2.8113 | ENSG00000073756/ENSG00000146648 | PTGS2/EGFR | GO_BP |
| GO:0032945~negative regulation of mononuclear cell proliferation | 1 | 1/43 | 73/18012 | 0.160401 | 0.209001 | 5.738133 | ENSG00000157873 | TNFRSF14 | GO_BP |
| GO:0044766~multi-organism transport | 1 | 1/43 | 73/18012 | 0.160401 | 0.209001 | 5.738133 | ENSG00000130303 | BST2 | GO_BP |
| GO:0048199~vesicle targeting, to, from or within Golgi | 1 | 1/43 | 73/18012 | 0.160401 | 0.209001 | 5.738133 | ENSG00000109321 | AREG | GO_BP |
| GO:0050672~negative regulation of lymphocyte proliferation | 1 | 1/43 | 73/18012 | 0.160401 | 0.209001 | 5.738133 | ENSG00000157873 | TNFRSF14 | GO_BP |
| GO:0050688~regulation of defense response to virus | 1 | 1/43 | 73/18012 | 0.160401 | 0.209001 | 5.738133 | ENSG00000118503 | TNFAIP3 | GO_BP |
| GO:1902579~multi-organism localization | 1 | 1/43 | 73/18012 | 0.160401 | 0.209001 | 5.738133 | ENSG00000130303 | BST2 | GO_BP |
| GO:0010769~regulation of cell morphogenesis involved in differentiation | 2 | 2/43 | 301/18012 | 0.161316 | 0.21005 | 2.783281 | ENSG00000171560/ENSG00000145147 | FGA/SLIT2 | GO_BP |
| GO:0009895~negative regulation of catabolic process | 2 | 2/43 | 302/18012 | 0.162157 | 0.210622 | 2.774064 | ENSG00000105835/ENSG00000146648 | NAMPT/EGFR | GO_BP |
| GO:0006809~nitric oxide biosynthetic process | 1 | 1/43 | 74/18012 | 0.162414 | 0.210622 | 5.660591 | ENSG00000073756 | PTGS2 | GO_BP |
| GO:0031670~cellular response to nutrient | 1 | 1/43 | 74/18012 | 0.162414 | 0.210622 | 5.660591 | ENSG00000073756 | PTGS2 | GO_BP |
| GO:0043536~positive regulation of blood vessel endothelial cell migration | 1 | 1/43 | 74/18012 | 0.162414 | 0.210622 | 5.660591 | ENSG00000073756 | PTGS2 | GO_BP |
| GO:0061045~negative regulation of wound healing | 1 | 1/43 | 74/18012 | 0.162414 | 0.210622 | 5.660591 | ENSG00000171560 | FGA | GO_BP |
| GO:1900076~regulation of cellular response to insulin stimulus | 1 | 1/43 | 74/18012 | 0.162414 | 0.210622 | 5.660591 | ENSG00000184557 | SOCS3 | GO_BP |
| GO:0003281~ventricular septum development | 1 | 1/43 | 75/18012 | 0.164422 | 0.212794 | 5.585116 | ENSG00000145147 | SLIT2 | GO_BP |
| GO:0030500~regulation of bone mineralization | 1 | 1/43 | 75/18012 | 0.164422 | 0.212794 | 5.585116 | ENSG00000187608 | ISG15 | GO_BP |
| GO:1900407~regulation of cellular response to oxidative stress | 1 | 1/43 | 75/18012 | 0.164422 | 0.212794 | 5.585116 | ENSG00000119508 | NR4A3 | GO_BP |
| GO:0001910~regulation of leukocyte mediated cytotoxicity | 1 | 1/43 | 76/18012 | 0.166425 | 0.214518 | 5.511628 | ENSG00000168685 | IL7R | GO_BP |
| GO:0007492~endoderm development | 1 | 1/43 | 76/18012 | 0.166425 | 0.214518 | 5.511628 | ENSG00000122641 | INHBA | GO_BP |
| GO:0010827~regulation of glucose transmembrane transport | 1 | 1/43 | 76/18012 | 0.166425 | 0.214518 | 5.511628 | ENSG00000119508 | NR4A3 | GO_BP |
| GO:0021536~diencephalon development | 1 | 1/43 | 76/18012 | 0.166425 | 0.214518 | 5.511628 | ENSG00000118257 | NRP2 | GO_BP |
| GO:0051851~modification by host of symbiont morphology or physiology | 1 | 1/43 | 76/18012 | 0.166425 | 0.214518 | 5.511628 | ENSG00000197081 | IGF2R | GO_BP |
| GO:0072088~nephron epithelium morphogenesis | 1 | 1/43 | 76/18012 | 0.166425 | 0.214518 | 5.511628 | ENSG00000128342 | LIF | GO_BP |
| GO:1990778~protein localization to cell periphery | 2 | 2/43 | 309/18012 | 0.168066 | 0.216222 | 2.711221 | ENSG00000174775/ENSG00000146648 | HRAS/EGFR | GO_BP |
| GO:0003151~outflow tract morphogenesis | 1 | 1/43 | 77/18012 | 0.168423 | 0.216222 | 5.440048 | ENSG00000118257 | NRP2 | GO_BP |
| GO:0030279~negative regulation of ossification | 1 | 1/43 | 77/18012 | 0.168423 | 0.216222 | 5.440048 | ENSG00000109321 | AREG | GO_BP |
| GO:0031016~pancreas development | 1 | 1/43 | 77/18012 | 0.168423 | 0.216222 | 5.440048 | ENSG00000136244 | IL6 | GO_BP |
| GO:0045652~regulation of megakaryocyte differentiation | 1 | 1/43 | 77/18012 | 0.168423 | 0.216222 | 5.440048 | ENSG00000119508 | NR4A3 | GO_BP |
| GO:0072332~intrinsic apoptotic signaling pathway by p53 class mediator | 1 | 1/43 | 77/18012 | 0.168423 | 0.216222 | 5.440048 | ENSG00000240972 | MIF | GO_BP |
| GO:0030193~regulation of blood coagulation | 1 | 1/43 | 78/18012 | 0.170417 | 0.218489 | 5.370304 | ENSG00000171560 | FGA | GO_BP |
| GO:0072028~nephron morphogenesis | 1 | 1/43 | 78/18012 | 0.170417 | 0.218489 | 5.370304 | ENSG00000128342 | LIF | GO_BP |
| GO:0051961~negative regulation of nervous system development | 2 | 2/43 | 312/18012 | 0.170611 | 0.218592 | 2.685152 | ENSG00000136244/ENSG00000145147 | IL6/SLIT2 | GO_BP |
| GO:0009416~response to light stimulus | 2 | 2/43 | 314/18012 | 0.172311 | 0.219863 | 2.668049 | ENSG00000073756/ENSG00000146648 | PTGS2/EGFR | GO_BP |
| GO:0043010~camera-type eye development | 2 | 2/43 | 314/18012 | 0.172311 | 0.219863 | 2.668049 | ENSG00000122641/ENSG00000146648 | INHBA/EGFR | GO_BP |
| GO:0006446~regulation of translational initiation | 1 | 1/43 | 79/18012 | 0.172406 | 0.219863 | 5.302326 | ENSG00000055332 | EIF2AK2 | GO_BP |
| GO:0021675~nerve development | 1 | 1/43 | 79/18012 | 0.172406 | 0.219863 | 5.302326 | ENSG00000118257 | NRP2 | GO_BP |
| GO:0046209~nitric oxide metabolic process | 1 | 1/43 | 79/18012 | 0.172406 | 0.219863 | 5.302326 | ENSG00000073756 | PTGS2 | GO_BP |
| GO:0048194~Golgi vesicle budding | 1 | 1/43 | 79/18012 | 0.172406 | 0.219863 | 5.302326 | ENSG00000109321 | AREG | GO_BP |
| GO:1900046~regulation of hemostasis | 1 | 1/43 | 79/18012 | 0.172406 | 0.219863 | 5.302326 | ENSG00000171560 | FGA | GO_BP |
| GO:1901214~regulation of neuron death | 2 | 2/43 | 315/18012 | 0.173162 | 0.220681 | 2.659579 | ENSG00000174775/ENSG00000119508 | HRAS/NR4A3 | GO_BP |
| GO:0010596~negative regulation of endothelial cell migration | 1 | 1/43 | 80/18012 | 0.17439 | 0.221951 | 5.236047 | ENSG00000145147 | SLIT2 | GO_BP |
| GO:0022617~extracellular matrix disassembly | 1 | 1/43 | 80/18012 | 0.17439 | 0.221951 | 5.236047 | ENSG00000136244 | IL6 | GO_BP |
| GO:0010660~regulation of muscle cell apoptotic process | 1 | 1/43 | 81/18012 | 0.17637 | 0.223138 | 5.171404 | ENSG00000180871 | CXCR2 | GO_BP |
| GO:0014032~neural crest cell development | 1 | 1/43 | 81/18012 | 0.17637 | 0.223138 | 5.171404 | ENSG00000118257 | NRP2 | GO_BP |
| GO:0021766~hippocampus development | 1 | 1/43 | 81/18012 | 0.17637 | 0.223138 | 5.171404 | ENSG00000119508 | NR4A3 | GO_BP |
| GO:0034109~homotypic cell-cell adhesion | 1 | 1/43 | 81/18012 | 0.17637 | 0.223138 | 5.171404 | ENSG00000171560 | FGA | GO_BP |
| GO:0036473~cell death in response to oxidative stress | 1 | 1/43 | 81/18012 | 0.17637 | 0.223138 | 5.171404 | ENSG00000119508 | NR4A3 | GO_BP |
| GO:0050818~regulation of coagulation | 1 | 1/43 | 81/18012 | 0.17637 | 0.223138 | 5.171404 | ENSG00000171560 | FGA | GO_BP |
| GO:0051702~interaction with symbiont | 1 | 1/43 | 81/18012 | 0.17637 | 0.223138 | 5.171404 | ENSG00000197081 | IGF2R | GO_BP |
| GO:1903533~regulation of protein targeting | 1 | 1/43 | 81/18012 | 0.17637 | 0.223138 | 5.171404 | ENSG00000174775 | HRAS | GO_BP |
| GO:2001021~negative regulation of response to DNA damage stimulus | 1 | 1/43 | 81/18012 | 0.17637 | 0.223138 | 5.171404 | ENSG00000240972 | MIF | GO_BP |
| GO:0034644~cellular response to UV | 1 | 1/43 | 82/18012 | 0.178345 | 0.225044 | 5.108338 | ENSG00000073756 | PTGS2 | GO_BP |
| GO:0043154~negative regulation of cysteine-type endopeptidase activity involved in apoptotic process | 1 | 1/43 | 82/18012 | 0.178345 | 0.225044 | 5.108338 | ENSG00000073756 | PTGS2 | GO_BP |
| GO:0046889~positive regulation of lipid biosynthetic process | 1 | 1/43 | 82/18012 | 0.178345 | 0.225044 | 5.108338 | ENSG00000073756 | PTGS2 | GO_BP |
| GO:2001057~reactive nitrogen species metabolic process | 1 | 1/43 | 82/18012 | 0.178345 | 0.225044 | 5.108338 | ENSG00000073756 | PTGS2 | GO_BP |
| GO:0071375~cellular response to peptide hormone stimulus | 2 | 2/43 | 322/18012 | 0.17914 | 0.225898 | 2.601762 | ENSG00000184557/ENSG00000119508 | SOCS3/NR4A3 | GO_BP |
| GO:0060218~hematopoietic stem cell differentiation | 1 | 1/43 | 83/18012 | 0.180316 | 0.226933 | 5.046792 | ENSG00000055332 | EIF2AK2 | GO_BP |
| GO:0097194~execution phase of apoptosis | 1 | 1/43 | 83/18012 | 0.180316 | 0.226933 | 5.046792 | ENSG00000136244 | IL6 | GO_BP |
| GO:0097581~lamellipodium organization | 1 | 1/43 | 83/18012 | 0.180316 | 0.226933 | 5.046792 | ENSG00000145147 | SLIT2 | GO_BP |
| GO:0051188~cofactor biosynthetic process | 2 | 2/43 | 325/18012 | 0.181713 | 0.228541 | 2.577746 | ENSG00000073756/ENSG00000105835 | PTGS2/NAMPT | GO_BP |
| GO:0002431~Fc receptor mediated stimulatory signaling pathway | 1 | 1/43 | 84/18012 | 0.182282 | 0.228657 | 4.986711 | ENSG00000119508 | NR4A3 | GO_BP |
| GO:0010507~negative regulation of autophagy | 1 | 1/43 | 84/18012 | 0.182282 | 0.228657 | 4.986711 | ENSG00000105835 | NAMPT | GO_BP |
| GO:0070542~response to fatty acid | 1 | 1/43 | 84/18012 | 0.182282 | 0.228657 | 4.986711 | ENSG00000073756 | PTGS2 | GO_BP |
| GO:1902882~regulation of response to oxidative stress | 1 | 1/43 | 84/18012 | 0.182282 | 0.228657 | 4.986711 | ENSG00000119508 | NR4A3 | GO_BP |
| GO:0045930~negative regulation of mitotic cell cycle | 2 | 2/43 | 326/18012 | 0.182572 | 0.228871 | 2.569839 | ENSG00000174775/ENSG00000146648 | HRAS/EGFR | GO_BP |
| GO:0010657~muscle cell apoptotic process | 1 | 1/43 | 85/18012 | 0.184243 | 0.229765 | 4.928044 | ENSG00000180871 | CXCR2 | GO_BP |
| GO:0014031~mesenchymal cell development | 1 | 1/43 | 85/18012 | 0.184243 | 0.229765 | 4.928044 | ENSG00000118257 | NRP2 | GO_BP |
| GO:0030317~flagellated sperm motility | 1 | 1/43 | 85/18012 | 0.184243 | 0.229765 | 4.928044 | ENSG00000164825 | DEFB1 | GO_BP |
| GO:0032760~positive regulation of tumor necrosis factor production | 1 | 1/43 | 85/18012 | 0.184243 | 0.229765 | 4.928044 | ENSG00000240972 | MIF | GO_BP |
| GO:0048864~stem cell development | 1 | 1/43 | 85/18012 | 0.184243 | 0.229765 | 4.928044 | ENSG00000118257 | NRP2 | GO_BP |
| GO:0050772~positive regulation of axonogenesis | 1 | 1/43 | 85/18012 | 0.184243 | 0.229765 | 4.928044 | ENSG00000145147 | SLIT2 | GO_BP |
| GO:0097722~sperm motility | 1 | 1/43 | 85/18012 | 0.184243 | 0.229765 | 4.928044 | ENSG00000164825 | DEFB1 | GO_BP |
| GO:1901532~regulation of hematopoietic progenitor cell differentiation | 1 | 1/43 | 85/18012 | 0.184243 | 0.229765 | 4.928044 | ENSG00000055332 | EIF2AK2 | GO_BP |
| GO:0090150~establishment of protein localization to membrane | 2 | 2/43 | 329/18012 | 0.185152 | 0.230748 | 2.546406 | ENSG00000174775/ENSG00000146648 | HRAS/EGFR | GO_BP |
| GO:0014068~positive regulation of phosphatidylinositol 3-kinase signaling | 1 | 1/43 | 86/18012 | 0.1862 | 0.231452 | 4.870741 | ENSG00000187266 | EPOR | GO_BP |
| GO:0032088~negative regulation of NF-kappaB transcription factor activity | 1 | 1/43 | 86/18012 | 0.1862 | 0.231452 | 4.870741 | ENSG00000118503 | TNFAIP3 | GO_BP |
| GO:0048013~ephrin receptor signaling pathway | 1 | 1/43 | 86/18012 | 0.1862 | 0.231452 | 4.870741 | ENSG00000174775 | HRAS | GO_BP |
| GO:0048644~muscle organ morphogenesis | 1 | 1/43 | 86/18012 | 0.1862 | 0.231452 | 4.870741 | ENSG00000128342 | LIF | GO_BP |
| GO:0032147~activation of protein kinase activity | 2 | 2/43 | 332/18012 | 0.187738 | 0.233213 | 2.523396 | ENSG00000055332/ENSG00000146648 | EIF2AK2/EGFR | GO_BP |
| GO:0010717~regulation of epithelial to mesenchymal transition | 1 | 1/43 | 87/18012 | 0.188152 | 0.233425 | 4.814755 | ENSG00000136244 | IL6 | GO_BP |
| GO:1903557~positive regulation of tumor necrosis factor superfamily cytokine production | 1 | 1/43 | 87/18012 | 0.188152 | 0.233425 | 4.814755 | ENSG00000240972 | MIF | GO_BP |
| GO:0007596~blood coagulation | 2 | 2/43 | 333/18012 | 0.188601 | 0.233831 | 2.515818 | ENSG00000171560/ENSG00000136244 | FGA/IL6 | GO_BP |
| GO:0009791~post-embryonic development | 1 | 1/43 | 88/18012 | 0.190099 | 0.234778 | 4.760042 | ENSG00000197081 | IGF2R | GO_BP |
| GO:0032651~regulation of interleukin-1 beta production | 1 | 1/43 | 88/18012 | 0.190099 | 0.234778 | 4.760042 | ENSG00000118503 | TNFAIP3 | GO_BP |
| GO:0060333~interferon-gamma-mediated signaling pathway | 1 | 1/43 | 88/18012 | 0.190099 | 0.234778 | 4.760042 | ENSG00000184557 | SOCS3 | GO_BP |
| GO:1901019~regulation of calcium ion transmembrane transporter activity | 1 | 1/43 | 88/18012 | 0.190099 | 0.234778 | 4.760042 | ENSG00000124942 | AHNAK | GO_BP |
| GO:1903035~negative regulation of response to wounding | 1 | 1/43 | 88/18012 | 0.190099 | 0.234778 | 4.760042 | ENSG00000171560 | FGA | GO_BP |
| GO:1903725~regulation of phospholipid metabolic process | 1 | 1/43 | 88/18012 | 0.190099 | 0.234778 | 4.760042 | ENSG00000184557 | SOCS3 | GO_BP |
| GO:0045921~positive regulation of exocytosis | 1 | 1/43 | 89/18012 | 0.192042 | 0.236438 | 4.706559 | ENSG00000171560 | FGA | GO_BP |
| GO:0060021~roof of mouth development | 1 | 1/43 | 89/18012 | 0.192042 | 0.236438 | 4.706559 | ENSG00000122641 | INHBA | GO_BP |
| GO:0097306~cellular response to alcohol | 1 | 1/43 | 89/18012 | 0.192042 | 0.236438 | 4.706559 | ENSG00000122641 | INHBA | GO_BP |
| GO:1901992~positive regulation of mitotic cell cycle phase transition | 1 | 1/43 | 89/18012 | 0.192042 | 0.236438 | 4.706559 | ENSG00000146648 | EGFR | GO_BP |
| GO:0050817~coagulation | 2 | 2/43 | 337/18012 | 0.192059 | 0.236438 | 2.485957 | ENSG00000171560/ENSG00000136244 | FGA/IL6 | GO_BP |
| GO:0007599~hemostasis | 2 | 2/43 | 338/18012 | 0.192925 | 0.237199 | 2.478602 | ENSG00000171560/ENSG00000136244 | FGA/IL6 | GO_BP |
| GO:0010721~negative regulation of cell development | 2 | 2/43 | 338/18012 | 0.192925 | 0.237199 | 2.478602 | ENSG00000136244/ENSG00000145147 | IL6/SLIT2 | GO_BP |
| GO:0014033~neural crest cell differentiation | 1 | 1/43 | 90/18012 | 0.193981 | 0.237887 | 4.654264 | ENSG00000118257 | NRP2 | GO_BP |
| GO:0030901~midbrain development | 1 | 1/43 | 90/18012 | 0.193981 | 0.237887 | 4.654264 | ENSG00000180871 | CXCR2 | GO_BP |
| GO:0031058~positive regulation of histone modification | 1 | 1/43 | 90/18012 | 0.193981 | 0.237887 | 4.654264 | ENSG00000128342 | LIF | GO_BP |
| GO:2000117~negative regulation of cysteine-type endopeptidase activity | 1 | 1/43 | 90/18012 | 0.193981 | 0.237887 | 4.654264 | ENSG00000073756 | PTGS2 | GO_BP |
| GO:0045638~negative regulation of myeloid cell differentiation | 1 | 1/43 | 91/18012 | 0.195914 | 0.240105 | 4.603118 | ENSG00000122641 | INHBA | GO_BP |
| GO:0072330~monocarboxylic acid biosynthetic process | 2 | 2/43 | 342/18012 | 0.196395 | 0.24054 | 2.449612 | ENSG00000073756/ENSG00000240972 | PTGS2/MIF | GO_BP |
| GO:0006903~vesicle targeting | 1 | 1/43 | 92/18012 | 0.197844 | 0.24216 | 4.553084 | ENSG00000109321 | AREG | GO_BP |
| GO:1902903~regulation of supramolecular fiber organization | 2 | 2/43 | 344/18012 | 0.198133 | 0.242359 | 2.43537 | ENSG00000106178/ENSG00000145147 | CCL24/SLIT2 | GO_BP |
| GO:0003300~cardiac muscle hypertrophy | 1 | 1/43 | 93/18012 | 0.199769 | 0.243583 | 4.504126 | ENSG00000119508 | NR4A3 | GO_BP |
| GO:0032755~positive regulation of interleukin-6 production | 1 | 1/43 | 93/18012 | 0.199769 | 0.243583 | 4.504126 | ENSG00000136244 | IL6 | GO_BP |
| GO:0070167~regulation of biomineral tissue development | 1 | 1/43 | 93/18012 | 0.199769 | 0.243583 | 4.504126 | ENSG00000187608 | ISG15 | GO_BP |
| GO:0072080~nephron tubule development | 1 | 1/43 | 93/18012 | 0.199769 | 0.243583 | 4.504126 | ENSG00000128342 | LIF | GO_BP |
| GO:1901655~cellular response to ketone | 1 | 1/43 | 93/18012 | 0.199769 | 0.243583 | 4.504126 | ENSG00000146648 | EGFR | GO_BP |
| GO:0010948~negative regulation of cell cycle process | 2 | 2/43 | 347/18012 | 0.200744 | 0.244617 | 2.414315 | ENSG00000240972/ENSG00000128342 | MIF/LIF | GO_BP |
| GO:0030219~megakaryocyte differentiation | 1 | 1/43 | 94/18012 | 0.201689 | 0.24499 | 4.45621 | ENSG00000119508 | NR4A3 | GO_BP |
| GO:0042102~positive regulation of T cell proliferation | 1 | 1/43 | 94/18012 | 0.201689 | 0.24499 | 4.45621 | ENSG00000136244 | IL6 | GO_BP |
| GO:0048010~vascular endothelial growth factor receptor signaling pathway | 1 | 1/43 | 94/18012 | 0.201689 | 0.24499 | 4.45621 | ENSG00000118257 | NRP2 | GO_BP |
| GO:0060993~kidney morphogenesis | 1 | 1/43 | 94/18012 | 0.201689 | 0.24499 | 4.45621 | ENSG00000128342 | LIF | GO_BP |
| GO:1903076~regulation of protein localization to plasma membrane | 1 | 1/43 | 94/18012 | 0.201689 | 0.24499 | 4.45621 | ENSG00000146648 | EGFR | GO_BP |
| GO:0045861~negative regulation of proteolysis | 2 | 2/43 | 349/18012 | 0.202487 | 0.245804 | 2.40048 | ENSG00000130303/ENSG00000073756 | BST2/PTGS2 | GO_BP |
| GO:0044070~regulation of anion transport | 1 | 1/43 | 95/18012 | 0.203605 | 0.246381 | 4.409302 | ENSG00000240972 | MIF | GO_BP |
| GO:0061326~renal tubule development | 1 | 1/43 | 95/18012 | 0.203605 | 0.246381 | 4.409302 | ENSG00000128342 | LIF | GO_BP |
| GO:0072376~protein activation cascade | 1 | 1/43 | 95/18012 | 0.203605 | 0.246381 | 4.409302 | ENSG00000171560 | FGA | GO_BP |
| GO:0097327~response to antineoplastic agent | 1 | 1/43 | 95/18012 | 0.203605 | 0.246381 | 4.409302 | ENSG00000146648 | EGFR | GO_BP |
| GO:1903426~regulation of reactive oxygen species biosynthetic process | 1 | 1/43 | 95/18012 | 0.203605 | 0.246381 | 4.409302 | ENSG00000073756 | PTGS2 | GO_BP |
| GO:0014897~striated muscle hypertrophy | 1 | 1/43 | 96/18012 | 0.205516 | 0.248068 | 4.363372 | ENSG00000119508 | NR4A3 | GO_BP |
| GO:0030838~positive regulation of actin filament polymerization | 1 | 1/43 | 96/18012 | 0.205516 | 0.248068 | 4.363372 | ENSG00000106178 | CCL24 | GO_BP |
| GO:0031341~regulation of cell killing | 1 | 1/43 | 96/18012 | 0.205516 | 0.248068 | 4.363372 | ENSG00000168685 | IL7R | GO_BP |
| GO:0051591~response to cAMP | 1 | 1/43 | 96/18012 | 0.205516 | 0.248068 | 4.363372 | ENSG00000109321 | AREG | GO_BP |
| GO:0001657~ureteric bud development | 1 | 1/43 | 97/18012 | 0.207423 | 0.249428 | 4.318389 | ENSG00000145147 | SLIT2 | GO_BP |
| GO:0010633~negative regulation of epithelial cell migration | 1 | 1/43 | 97/18012 | 0.207423 | 0.249428 | 4.318389 | ENSG00000145147 | SLIT2 | GO_BP |
| GO:0010771~negative regulation of cell morphogenesis involved in differentiation | 1 | 1/43 | 97/18012 | 0.207423 | 0.249428 | 4.318389 | ENSG00000145147 | SLIT2 | GO_BP |
| GO:0015908~fatty acid transport | 1 | 1/43 | 97/18012 | 0.207423 | 0.249428 | 4.318389 | ENSG00000240972 | MIF | GO_BP |
| GO:0043502~regulation of muscle adaptation | 1 | 1/43 | 97/18012 | 0.207423 | 0.249428 | 4.318389 | ENSG00000119508 | NR4A3 | GO_BP |
| GO:2001022~positive regulation of response to DNA damage stimulus | 1 | 1/43 | 97/18012 | 0.207423 | 0.249428 | 4.318389 | ENSG00000146648 | EGFR | GO_BP |
| GO:0014896~muscle hypertrophy | 1 | 1/43 | 98/18012 | 0.209325 | 0.250929 | 4.274324 | ENSG00000119508 | NR4A3 | GO_BP |
| GO:0042472~inner ear morphogenesis | 1 | 1/43 | 98/18012 | 0.209325 | 0.250929 | 4.274324 | ENSG00000119508 | NR4A3 | GO_BP |
| GO:0072163~mesonephric epithelium development | 1 | 1/43 | 98/18012 | 0.209325 | 0.250929 | 4.274324 | ENSG00000145147 | SLIT2 | GO_BP |
| GO:0072164~mesonephric tubule development | 1 | 1/43 | 98/18012 | 0.209325 | 0.250929 | 4.274324 | ENSG00000145147 | SLIT2 | GO_BP |
| GO:0099175~regulation of postsynapse organization | 1 | 1/43 | 98/18012 | 0.209325 | 0.250929 | 4.274324 | ENSG00000118257 | NRP2 | GO_BP |
| GO:0030111~regulation of Wnt signaling pathway | 2 | 2/43 | 357/18012 | 0.209477 | 0.250954 | 2.346688 | ENSG00000118503/ENSG00000146648 | TNFAIP3/EGFR | GO_BP |
| GO:0019395~fatty acid oxidation | 1 | 1/43 | 99/18012 | 0.211223 | 0.252572 | 4.231149 | ENSG00000119508 | NR4A3 | GO_BP |
| GO:0032611~interleukin-1 beta production | 1 | 1/43 | 99/18012 | 0.211223 | 0.252572 | 4.231149 | ENSG00000118503 | TNFAIP3 | GO_BP |
| GO:0098869~cellular oxidant detoxification | 1 | 1/43 | 99/18012 | 0.211223 | 0.252572 | 4.231149 | ENSG00000073756 | PTGS2 | GO_BP |
| GO:0001654~eye development | 2 | 2/43 | 361/18012 | 0.212983 | 0.253258 | 2.320685 | ENSG00000122641/ENSG00000146648 | INHBA/EGFR | GO_BP |
| GO:0031331~positive regulation of cellular catabolic process | 2 | 2/43 | 361/18012 | 0.212983 | 0.253258 | 2.320685 | ENSG00000118503/ENSG00000136244 | TNFAIP3/IL6 | GO_BP |
| GO:0000018~regulation of DNA recombination | 1 | 1/43 | 100/18012 | 0.213117 | 0.253258 | 4.188837 | ENSG00000168685 | IL7R | GO_BP |
| GO:0006900~vesicle budding from membrane | 1 | 1/43 | 100/18012 | 0.213117 | 0.253258 | 4.188837 | ENSG00000109321 | AREG | GO_BP |
| GO:0007200~phospholipase C-activating G protein-coupled receptor signaling pathway | 1 | 1/43 | 100/18012 | 0.213117 | 0.253258 | 4.188837 | ENSG00000180871 | CXCR2 | GO_BP |
| GO:0032652~regulation of interleukin-1 production | 1 | 1/43 | 100/18012 | 0.213117 | 0.253258 | 4.188837 | ENSG00000118503 | TNFAIP3 | GO_BP |
| GO:0034446~substrate adhesion-dependent cell spreading | 1 | 1/43 | 100/18012 | 0.213117 | 0.253258 | 4.188837 | ENSG00000171560 | FGA | GO_BP |
| GO:0035282~segmentation | 1 | 1/43 | 100/18012 | 0.213117 | 0.253258 | 4.188837 | ENSG00000118257 | NRP2 | GO_BP |
| GO:0070498~interleukin-1-mediated signaling pathway | 1 | 1/43 | 100/18012 | 0.213117 | 0.253258 | 4.188837 | ENSG00000136244 | IL6 | GO_BP |
| GO:0120034~positive regulation of plasma membrane bounded cell projection assembly | 1 | 1/43 | 100/18012 | 0.213117 | 0.253258 | 4.188837 | ENSG00000174775 | HRAS | GO_BP |
| GO:0031532~actin cytoskeleton reorganization | 1 | 1/43 | 101/18012 | 0.215006 | 0.255186 | 4.147364 | ENSG00000174775 | HRAS | GO_BP |
| GO:0034440~lipid oxidation | 1 | 1/43 | 101/18012 | 0.215006 | 0.255186 | 4.147364 | ENSG00000119508 | NR4A3 | GO_BP |
| GO:0030198~extracellular matrix organization | 2 | 2/43 | 365/18012 | 0.216495 | 0.256477 | 2.295253 | ENSG00000171560/ENSG00000136244 | FGA/IL6 | GO_BP |
| GO:0036293~response to decreased oxygen levels | 2 | 2/43 | 365/18012 | 0.216495 | 0.256477 | 2.295253 | ENSG00000073756/ENSG00000105835 | PTGS2/NAMPT | GO_BP |
| GO:0150063~visual system development | 2 | 2/43 | 365/18012 | 0.216495 | 0.256477 | 2.295253 | ENSG00000122641/ENSG00000146648 | INHBA/EGFR | GO_BP |
| GO:0001823~mesonephros development | 1 | 1/43 | 102/18012 | 0.21689 | 0.256629 | 4.106703 | ENSG00000145147 | SLIT2 | GO_BP |
| GO:1902106~negative regulation of leukocyte differentiation | 1 | 1/43 | 102/18012 | 0.21689 | 0.256629 | 4.106703 | ENSG00000122641 | INHBA | GO_BP |
| GO:0002708~positive regulation of lymphocyte mediated immunity | 1 | 1/43 | 103/18012 | 0.21877 | 0.258216 | 4.066832 | ENSG00000136244 | IL6 | GO_BP |
| GO:0008593~regulation of Notch signaling pathway | 1 | 1/43 | 103/18012 | 0.21877 | 0.258216 | 4.066832 | ENSG00000146648 | EGFR | GO_BP |
| GO:0042136~neurotransmitter biosynthetic process | 1 | 1/43 | 103/18012 | 0.21877 | 0.258216 | 4.066832 | ENSG00000073756 | PTGS2 | GO_BP |
| GO:1905269~positive regulation of chromatin organization | 1 | 1/43 | 103/18012 | 0.21877 | 0.258216 | 4.066832 | ENSG00000128342 | LIF | GO_BP |
| GO:0008630~intrinsic apoptotic signaling pathway in response to DNA damage | 1 | 1/43 | 104/18012 | 0.220646 | 0.25995 | 4.027728 | ENSG00000240972 | MIF | GO_BP |
| GO:0051341~regulation of oxidoreductase activity | 1 | 1/43 | 104/18012 | 0.220646 | 0.25995 | 4.027728 | ENSG00000146648 | EGFR | GO_BP |
| GO:1901989~positive regulation of cell cycle phase transition | 1 | 1/43 | 104/18012 | 0.220646 | 0.25995 | 4.027728 | ENSG00000146648 | EGFR | GO_BP |
| GO:0048880~sensory system development | 2 | 2/43 | 370/18012 | 0.220893 | 0.260081 | 2.264236 | ENSG00000122641/ENSG00000146648 | INHBA/EGFR | GO_BP |
| GO:0042692~muscle cell differentiation | 2 | 2/43 | 371/18012 | 0.221773 | 0.260958 | 2.258133 | ENSG00000101096/ENSG00000161055 | NFATC2/SCGB3A1 | GO_BP |
| GO:0001909~leukocyte mediated cytotoxicity | 1 | 1/43 | 105/18012 | 0.222517 | 0.261192 | 3.989369 | ENSG00000168685 | IL7R | GO_BP |
| GO:0007041~lysosomal transport | 1 | 1/43 | 105/18012 | 0.222517 | 0.261192 | 3.989369 | ENSG00000197081 | IGF2R | GO_BP |
| GO:0046822~regulation of nucleocytoplasmic transport | 1 | 1/43 | 105/18012 | 0.222517 | 0.261192 | 3.989369 | ENSG00000073756 | PTGS2 | GO_BP |
| GO:0090100~positive regulation of transmembrane receptor protein serine/threonine kinase signaling pathway | 1 | 1/43 | 105/18012 | 0.222517 | 0.261192 | 3.989369 | ENSG00000122641 | INHBA | GO_BP |
| GO:0048524~positive regulation of viral process | 1 | 1/43 | 106/18012 | 0.224384 | 0.263062 | 3.951733 | ENSG00000197081 | IGF2R | GO_BP |
| GO:1904659~glucose transmembrane transport | 1 | 1/43 | 106/18012 | 0.224384 | 0.263062 | 3.951733 | ENSG00000119508 | NR4A3 | GO_BP |
| GO:0030330~DNA damage response, signal transduction by p53 class mediator | 1 | 1/43 | 107/18012 | 0.226247 | 0.264922 | 3.914801 | ENSG00000240972 | MIF | GO_BP |
| GO:0071156~regulation of cell cycle arrest | 1 | 1/43 | 107/18012 | 0.226247 | 0.264922 | 3.914801 | ENSG00000240972 | MIF | GO_BP |
| GO:0042176~regulation of protein catabolic process | 2 | 2/43 | 377/18012 | 0.227064 | 0.265716 | 2.222195 | ENSG00000118503/ENSG00000146648 | TNFAIP3/EGFR | GO_BP |
| GO:0006939~smooth muscle contraction | 1 | 1/43 | 108/18012 | 0.228105 | 0.266447 | 3.878553 | ENSG00000073756 | PTGS2 | GO_BP |
| GO:0032526~response to retinoic acid | 1 | 1/43 | 108/18012 | 0.228105 | 0.266447 | 3.878553 | ENSG00000197081 | IGF2R | GO_BP |
| GO:0050905~neuromuscular process | 1 | 1/43 | 108/18012 | 0.228105 | 0.266447 | 3.878553 | ENSG00000119508 | NR4A3 | GO_BP |
| GO:0001676~long-chain fatty acid metabolic process | 1 | 1/43 | 109/18012 | 0.229959 | 0.26796 | 3.84297 | ENSG00000073756 | PTGS2 | GO_BP |
| GO:0032963~collagen metabolic process | 1 | 1/43 | 109/18012 | 0.229959 | 0.26796 | 3.84297 | ENSG00000136244 | IL6 | GO_BP |
| GO:0072009~nephron epithelium development | 1 | 1/43 | 109/18012 | 0.229959 | 0.26796 | 3.84297 | ENSG00000128342 | LIF | GO_BP |
| GO:1990748~cellular detoxification | 1 | 1/43 | 109/18012 | 0.229959 | 0.26796 | 3.84297 | ENSG00000073756 | PTGS2 | GO_BP |
| GO:0031346~positive regulation of cell projection organization | 2 | 2/43 | 381/18012 | 0.230597 | 0.268539 | 2.198865 | ENSG00000174775/ENSG00000145147 | HRAS/SLIT2 | GO_BP |
| GO:0008645~hexose transmembrane transport | 1 | 1/43 | 110/18012 | 0.231809 | 0.26946 | 3.808034 | ENSG00000119508 | NR4A3 | GO_BP |
| GO:0016101~diterpenoid metabolic process | 1 | 1/43 | 110/18012 | 0.231809 | 0.26946 | 3.808034 | ENSG00000146648 | EGFR | GO_BP |
| GO:0060964~regulation of gene silencing by miRNA | 1 | 1/43 | 110/18012 | 0.231809 | 0.26946 | 3.808034 | ENSG00000146648 | EGFR | GO_BP |
| GO:0009165~nucleotide biosynthetic process | 2 | 2/43 | 383/18012 | 0.232365 | 0.269943 | 2.187382 | ENSG00000073756/ENSG00000105835 | PTGS2/NAMPT | GO_BP |
| GO:0050868~negative regulation of T cell activation | 1 | 1/43 | 111/18012 | 0.233654 | 0.271276 | 3.773727 | ENSG00000157873 | TNFRSF14 | GO_BP |
| GO:0002223~stimulatory C-type lectin receptor signaling pathway | 1 | 1/43 | 112/18012 | 0.235495 | 0.272753 | 3.740033 | ENSG00000174775 | HRAS | GO_BP |
| GO:0015749~monosaccharide transmembrane transport | 1 | 1/43 | 112/18012 | 0.235495 | 0.272753 | 3.740033 | ENSG00000119508 | NR4A3 | GO_BP |
| GO:0032612~interleukin-1 production | 1 | 1/43 | 112/18012 | 0.235495 | 0.272753 | 3.740033 | ENSG00000118503 | TNFAIP3 | GO_BP |
| GO:0043500~muscle adaptation | 1 | 1/43 | 112/18012 | 0.235495 | 0.272753 | 3.740033 | ENSG00000119508 | NR4A3 | GO_BP |
| GO:0010959~regulation of metal ion transport | 2 | 2/43 | 387/18012 | 0.235904 | 0.272897 | 2.164774 | ENSG00000124942/ENSG00000073756 | AHNAK/PTGS2 | GO_BP |
| GO:1901293~nucleoside phosphate biosynthetic process | 2 | 2/43 | 387/18012 | 0.235904 | 0.272897 | 2.164774 | ENSG00000073756/ENSG00000105835 | PTGS2/NAMPT | GO_BP |
| GO:0043200~response to amino acid | 1 | 1/43 | 113/18012 | 0.237331 | 0.274383 | 3.706936 | ENSG00000146648 | EGFR | GO_BP |
| GO:0070482~response to oxygen levels | 2 | 2/43 | 389/18012 | 0.237675 | 0.274615 | 2.153644 | ENSG00000073756/ENSG00000105835 | PTGS2/NAMPT | GO_BP |
| GO:0034219~carbohydrate transmembrane transport | 1 | 1/43 | 114/18012 | 0.239163 | 0.275836 | 3.674419 | ENSG00000119508 | NR4A3 | GO_BP |
| GO:0060147~regulation of posttranscriptional gene silencing | 1 | 1/43 | 114/18012 | 0.239163 | 0.275836 | 3.674419 | ENSG00000146648 | EGFR | GO_BP |
| GO:0060966~regulation of gene silencing by RNA | 1 | 1/43 | 114/18012 | 0.239163 | 0.275836 | 3.674419 | ENSG00000146648 | EGFR | GO_BP |
| GO:0010639~negative regulation of organelle organization | 2 | 2/43 | 392/18012 | 0.240333 | 0.277018 | 2.137162 | ENSG00000145147/ENSG00000128342 | SLIT2/LIF | GO_BP |
| GO:0002220~innate immune response activating cell surface receptor signaling pathway | 1 | 1/43 | 115/18012 | 0.240991 | 0.277444 | 3.642467 | ENSG00000174775 | HRAS | GO_BP |
| GO:2000736~regulation of stem cell differentiation | 1 | 1/43 | 115/18012 | 0.240991 | 0.277444 | 3.642467 | ENSG00000055332 | EIF2AK2 | GO_BP |
| GO:0007015~actin filament organization | 2 | 2/43 | 394/18012 | 0.242106 | 0.27856 | 2.126313 | ENSG00000106178/ENSG00000145147 | CCL24/SLIT2 | GO_BP |
| GO:0043666~regulation of phosphoprotein phosphatase activity | 1 | 1/43 | 116/18012 | 0.242815 | 0.278874 | 3.611067 | ENSG00000055332 | EIF2AK2 | GO_BP |
| GO:1903409~reactive oxygen species biosynthetic process | 1 | 1/43 | 116/18012 | 0.242815 | 0.278874 | 3.611067 | ENSG00000073756 | PTGS2 | GO_BP |
| GO:1903670~regulation of sprouting angiogenesis | 1 | 1/43 | 116/18012 | 0.242815 | 0.278874 | 3.611067 | ENSG00000073756 | PTGS2 | GO_BP |
| GO:0072089~stem cell proliferation | 1 | 1/43 | 117/18012 | 0.244634 | 0.280795 | 3.580203 | ENSG00000055332 | EIF2AK2 | GO_BP |
| GO:0007613~memory | 1 | 1/43 | 118/18012 | 0.246449 | 0.28254 | 3.549862 | ENSG00000073756 | PTGS2 | GO_BP |
| GO:0042471~ear morphogenesis | 1 | 1/43 | 118/18012 | 0.246449 | 0.28254 | 3.549862 | ENSG00000119508 | NR4A3 | GO_BP |
| GO:0006732~coenzyme metabolic process | 2 | 2/43 | 402/18012 | 0.249205 | 0.285529 | 2.083999 | ENSG00000073756/ENSG00000105835 | PTGS2/NAMPT | GO_BP |
| GO:0006721~terpenoid metabolic process | 1 | 1/43 | 120/18012 | 0.250067 | 0.286034 | 3.490698 | ENSG00000146648 | EGFR | GO_BP |
| GO:0006417~regulation of translation | 2 | 2/43 | 403/18012 | 0.250093 | 0.286034 | 2.078827 | ENSG00000055332/ENSG00000136244 | EIF2AK2/IL6 | GO_BP |
| GO:0043547~positive regulation of GTPase activity | 2 | 2/43 | 403/18012 | 0.250093 | 0.286034 | 2.078827 | ENSG00000106178/ENSG00000174775 | CCL24/HRAS | GO_BP |
| GO:0010811~positive regulation of cell-substrate adhesion | 1 | 1/43 | 121/18012 | 0.251869 | 0.287722 | 3.461849 | ENSG00000171560 | FGA | GO_BP |
| GO:0030968~endoplasmic reticulum unfolded protein response | 1 | 1/43 | 121/18012 | 0.251869 | 0.287722 | 3.461849 | ENSG00000055332 | EIF2AK2 | GO_BP |
| GO:0006282~regulation of DNA repair | 1 | 1/43 | 122/18012 | 0.253667 | 0.289603 | 3.433473 | ENSG00000146648 | EGFR | GO_BP |
| GO:0052548~regulation of endopeptidase activity | 2 | 2/43 | 408/18012 | 0.254535 | 0.290422 | 2.053352 | ENSG00000130303/ENSG00000073756 | BST2/PTGS2 | GO_BP |
| GO:0046717~acid secretion | 1 | 1/43 | 124/18012 | 0.257251 | 0.293345 | 3.378095 | ENSG00000240972 | MIF | GO_BP |
| GO:0051101~regulation of DNA binding | 1 | 1/43 | 125/18012 | 0.259036 | 0.29503 | 3.35107 | ENSG00000128342 | LIF | GO_BP |
| GO:0051291~protein heterooligomerization | 1 | 1/43 | 125/18012 | 0.259036 | 0.29503 | 3.35107 | ENSG00000174775 | HRAS | GO_BP |
| GO:0002576~platelet degranulation | 1 | 1/43 | 127/18012 | 0.262594 | 0.298374 | 3.298297 | ENSG00000171560 | FGA | GO_BP |
| GO:0045727~positive regulation of translation | 1 | 1/43 | 127/18012 | 0.262594 | 0.298374 | 3.298297 | ENSG00000136244 | IL6 | GO_BP |
| GO:0098754~detoxification | 1 | 1/43 | 127/18012 | 0.262594 | 0.298374 | 3.298297 | ENSG00000073756 | PTGS2 | GO_BP |
| GO:1903038~negative regulation of leukocyte cell-cell adhesion | 1 | 1/43 | 127/18012 | 0.262594 | 0.298374 | 3.298297 | ENSG00000157873 | TNFRSF14 | GO_BP |
| GO:0043062~extracellular structure organization | 2 | 2/43 | 418/18012 | 0.263427 | 0.298967 | 2.004228 | ENSG00000171560/ENSG00000136244 | FGA/IL6 | GO_BP |
| GO:0043588~skin development | 2 | 2/43 | 418/18012 | 0.263427 | 0.298967 | 2.004228 | ENSG00000122641/ENSG00000146648 | INHBA/EGFR | GO_BP |
| GO:0035270~endocrine system development | 1 | 1/43 | 128/18012 | 0.264367 | 0.299679 | 3.272529 | ENSG00000136244 | IL6 | GO_BP |
| GO:0042177~negative regulation of protein catabolic process | 1 | 1/43 | 128/18012 | 0.264367 | 0.299679 | 3.272529 | ENSG00000146648 | EGFR | GO_BP |
| GO:0032386~regulation of intracellular transport | 2 | 2/43 | 420/18012 | 0.265207 | 0.300453 | 1.994684 | ENSG00000073756/ENSG00000174775 | PTGS2/HRAS | GO_BP |
| GO:0071482~cellular response to light stimulus | 1 | 1/43 | 129/18012 | 0.266136 | 0.301328 | 3.247161 | ENSG00000073756 | PTGS2 | GO_BP |
| GO:0009896~positive regulation of catabolic process | 2 | 2/43 | 423/18012 | 0.267876 | 0.302968 | 1.980538 | ENSG00000118503/ENSG00000136244 | TNFAIP3/IL6 | GO_BP |
| GO:0003231~cardiac ventricle development | 1 | 1/43 | 130/18012 | 0.267901 | 0.302968 | 3.222182 | ENSG00000145147 | SLIT2 | GO_BP |
| GO:0030183~B cell differentiation | 1 | 1/43 | 131/18012 | 0.269661 | 0.3046 | 3.197586 | ENSG00000122641 | INHBA | GO_BP |
| GO:0032273~positive regulation of protein polymerization | 1 | 1/43 | 131/18012 | 0.269661 | 0.3046 | 3.197586 | ENSG00000106178 | CCL24 | GO_BP |
| GO:0002705~positive regulation of leukocyte mediated immunity | 1 | 1/43 | 132/18012 | 0.271417 | 0.305683 | 3.173362 | ENSG00000136244 | IL6 | GO_BP |
| GO:0034605~cellular response to heat | 1 | 1/43 | 132/18012 | 0.271417 | 0.305683 | 3.173362 | ENSG00000073756 | PTGS2 | GO_BP |
| GO:0042476~odontogenesis | 1 | 1/43 | 132/18012 | 0.271417 | 0.305683 | 3.173362 | ENSG00000122641 | INHBA | GO_BP |
| GO:0042770~signal transduction in response to DNA damage | 1 | 1/43 | 132/18012 | 0.271417 | 0.305683 | 3.173362 | ENSG00000240972 | MIF | GO_BP |
| GO:0048565~digestive tract development | 1 | 1/43 | 132/18012 | 0.271417 | 0.305683 | 3.173362 | ENSG00000146648 | EGFR | GO_BP |
| GO:0006816~calcium ion transport | 2 | 2/43 | 428/18012 | 0.272325 | 0.306526 | 1.957401 | ENSG00000124942/ENSG00000073756 | AHNAK/PTGS2 | GO_BP |
| GO:0043484~regulation of RNA splicing | 1 | 1/43 | 134/18012 | 0.274918 | 0.309262 | 3.125998 | ENSG00000124942 | AHNAK | GO_BP |
| GO:0042391~regulation of membrane potential | 2 | 2/43 | 433/18012 | 0.276775 | 0.311169 | 1.934798 | ENSG00000139574/ENSG00000267281 | NPFF/AC023509.3 | GO_BP |
| GO:0071901~negative regulation of protein serine/threonine kinase activity | 1 | 1/43 | 136/18012 | 0.278401 | 0.312803 | 3.080027 | ENSG00000118503 | TNFAIP3 | GO_BP |
| GO:0052547~regulation of peptidase activity | 2 | 2/43 | 435/18012 | 0.278554 | 0.312803 | 1.925902 | ENSG00000130303/ENSG00000073756 | BST2/PTGS2 | GO_BP |
| GO:0001837~epithelial to mesenchymal transition | 1 | 1/43 | 137/18012 | 0.280137 | 0.314029 | 3.057545 | ENSG00000136244 | IL6 | GO_BP |
| GO:0031333~negative regulation of protein complex assembly | 1 | 1/43 | 137/18012 | 0.280137 | 0.314029 | 3.057545 | ENSG00000145147 | SLIT2 | GO_BP |
| GO:0043535~regulation of blood vessel endothelial cell migration | 1 | 1/43 | 137/18012 | 0.280137 | 0.314029 | 3.057545 | ENSG00000073756 | PTGS2 | GO_BP |
| GO:0008584~male gonad development | 1 | 1/43 | 138/18012 | 0.281869 | 0.315233 | 3.035389 | ENSG00000122641 | INHBA | GO_BP |
| GO:0035304~regulation of protein dephosphorylation | 1 | 1/43 | 138/18012 | 0.281869 | 0.315233 | 3.035389 | ENSG00000055332 | EIF2AK2 | GO_BP |
| GO:0046330~positive regulation of JNK cascade | 1 | 1/43 | 138/18012 | 0.281869 | 0.315233 | 3.035389 | ENSG00000174775 | HRAS | GO_BP |
| GO:1902904~negative regulation of supramolecular fiber organization | 1 | 1/43 | 138/18012 | 0.281869 | 0.315233 | 3.035389 | ENSG00000145147 | SLIT2 | GO_BP |
| GO:0006720~isoprenoid metabolic process | 1 | 1/43 | 139/18012 | 0.283597 | 0.316611 | 3.013552 | ENSG00000146648 | EGFR | GO_BP |
| GO:0034620~cellular response to unfolded protein | 1 | 1/43 | 139/18012 | 0.283597 | 0.316611 | 3.013552 | ENSG00000055332 | EIF2AK2 | GO_BP |
| GO:0046546~development of primary male sexual characteristics | 1 | 1/43 | 139/18012 | 0.283597 | 0.316611 | 3.013552 | ENSG00000122641 | INHBA | GO_BP |
| GO:0007034~vacuolar transport | 1 | 1/43 | 140/18012 | 0.28532 | 0.318165 | 2.992027 | ENSG00000197081 | IGF2R | GO_BP |
| GO:1903364~positive regulation of cellular protein catabolic process | 1 | 1/43 | 140/18012 | 0.28532 | 0.318165 | 2.992027 | ENSG00000118503 | TNFAIP3 | GO_BP |
| GO:0006606~protein import into nucleus | 1 | 1/43 | 142/18012 | 0.288755 | 0.321248 | 2.949885 | ENSG00000073756 | PTGS2 | GO_BP |
| GO:0008286~insulin receptor signaling pathway | 1 | 1/43 | 142/18012 | 0.288755 | 0.321248 | 2.949885 | ENSG00000184557 | SOCS3 | GO_BP |
| GO:0030879~mammary gland development | 1 | 1/43 | 142/18012 | 0.288755 | 0.321248 | 2.949885 | ENSG00000109321 | AREG | GO_BP |
| GO:0072006~nephron development | 1 | 1/43 | 142/18012 | 0.288755 | 0.321248 | 2.949885 | ENSG00000128342 | LIF | GO_BP |
| GO:0031056~regulation of histone modification | 1 | 1/43 | 143/18012 | 0.290467 | 0.322965 | 2.929257 | ENSG00000128342 | LIF | GO_BP |
| GO:0055123~digestive system development | 1 | 1/43 | 144/18012 | 0.292174 | 0.324675 | 2.908915 | ENSG00000146648 | EGFR | GO_BP |
| GO:0003012~muscle system process | 2 | 2/43 | 451/18012 | 0.292784 | 0.325164 | 1.857577 | ENSG00000073756/ENSG00000119508 | PTGS2/NR4A3 | GO_BP |
| GO:0030534~adult behavior | 1 | 1/43 | 145/18012 | 0.293877 | 0.325813 | 2.888853 | ENSG00000119508 | NR4A3 | GO_BP |
| GO:0051494~negative regulation of cytoskeleton organization | 1 | 1/43 | 145/18012 | 0.293877 | 0.325813 | 2.888853 | ENSG00000145147 | SLIT2 | GO_BP |
| GO:0090263~positive regulation of canonical Wnt signaling pathway | 1 | 1/43 | 145/18012 | 0.293877 | 0.325813 | 2.888853 | ENSG00000146648 | EGFR | GO_BP |
| GO:0008643~carbohydrate transport | 1 | 1/43 | 146/18012 | 0.295577 | 0.327508 | 2.869067 | ENSG00000119508 | NR4A3 | GO_BP |
| GO:0007612~learning | 1 | 1/43 | 147/18012 | 0.297272 | 0.329196 | 2.849549 | ENSG00000073756 | PTGS2 | GO_BP |
| GO:0062012~regulation of small molecule metabolic process | 2 | 2/43 | 457/18012 | 0.298114 | 0.329938 | 1.833189 | ENSG00000073756/ENSG00000119508 | PTGS2/NR4A3 | GO_BP |
| GO:0009267~cellular response to starvation | 1 | 1/43 | 148/18012 | 0.298964 | 0.330307 | 2.830295 | ENSG00000055332 | EIF2AK2 | GO_BP |
| GO:0051668~localization within membrane | 1 | 1/43 | 148/18012 | 0.298964 | 0.330307 | 2.830295 | ENSG00000174775 | HRAS | GO_BP |
| GO:1903169~regulation of calcium ion transmembrane transport | 1 | 1/43 | 148/18012 | 0.298964 | 0.330307 | 2.830295 | ENSG00000124942 | AHNAK | GO_BP |
| GO:0030856~regulation of epithelial cell differentiation | 1 | 1/43 | 149/18012 | 0.300651 | 0.331928 | 2.8113 | ENSG00000128342 | LIF | GO_BP |
| GO:0046394~carboxylic acid biosynthetic process | 2 | 2/43 | 460/18012 | 0.300777 | 0.331928 | 1.821234 | ENSG00000073756/ENSG00000240972 | PTGS2/MIF | GO_BP |
| GO:0016053~organic acid biosynthetic process | 2 | 2/43 | 461/18012 | 0.301665 | 0.332716 | 1.817283 | ENSG00000073756/ENSG00000240972 | PTGS2/MIF | GO_BP |
| GO:0051092~positive regulation of NF-kappaB transcription factor activity | 1 | 1/43 | 150/18012 | 0.302335 | 0.333263 | 2.792558 | ENSG00000055332 | EIF2AK2 | GO_BP |
| GO:0034248~regulation of cellular amide metabolic process | 2 | 2/43 | 462/18012 | 0.302552 | 0.333311 | 1.813349 | ENSG00000055332/ENSG00000136244 | EIF2AK2/IL6 | GO_BP |
| GO:0008544~epidermis development | 2 | 2/43 | 463/18012 | 0.303439 | 0.333963 | 1.809433 | ENSG00000122641/ENSG00000146648 | INHBA/EGFR | GO_BP |
| GO:0007286~spermatid development | 1 | 1/43 | 151/18012 | 0.304014 | 0.333963 | 2.774064 | ENSG00000164825 | DEFB1 | GO_BP |
| GO:0016999~antibiotic metabolic process | 1 | 1/43 | 151/18012 | 0.304014 | 0.333963 | 2.774064 | ENSG00000146648 | EGFR | GO_BP |
| GO:0042133~neurotransmitter metabolic process | 1 | 1/43 | 151/18012 | 0.304014 | 0.333963 | 2.774064 | ENSG00000073756 | PTGS2 | GO_BP |
| GO:0060968~regulation of gene silencing | 1 | 1/43 | 151/18012 | 0.304014 | 0.333963 | 2.774064 | ENSG00000146648 | EGFR | GO_BP |
| GO:0008360~regulation of cell shape | 1 | 1/43 | 152/18012 | 0.30569 | 0.335611 | 2.755814 | ENSG00000106178 | CCL24 | GO_BP |
| GO:0034250~positive regulation of cellular amide metabolic process | 1 | 1/43 | 153/18012 | 0.307361 | 0.337061 | 2.737802 | ENSG00000136244 | IL6 | GO_BP |
| GO:0043271~negative regulation of ion transport | 1 | 1/43 | 153/18012 | 0.307361 | 0.337061 | 2.737802 | ENSG00000073756 | PTGS2 | GO_BP |
| GO:0006090~pyruvate metabolic process | 1 | 1/43 | 154/18012 | 0.309029 | 0.338309 | 2.720024 | ENSG00000119508 | NR4A3 | GO_BP |
| GO:0010977~negative regulation of neuron projection development | 1 | 1/43 | 154/18012 | 0.309029 | 0.338309 | 2.720024 | ENSG00000145147 | SLIT2 | GO_BP |
| GO:1903707~negative regulation of hemopoiesis | 1 | 1/43 | 154/18012 | 0.309029 | 0.338309 | 2.720024 | ENSG00000122641 | INHBA | GO_BP |
| GO:0035051~cardiocyte differentiation | 1 | 1/43 | 155/18012 | 0.310693 | 0.339937 | 2.702476 | ENSG00000146648 | EGFR | GO_BP |
| GO:0016573~histone acetylation | 1 | 1/43 | 156/18012 | 0.312353 | 0.341558 | 2.685152 | ENSG00000128342 | LIF | GO_BP |
| GO:0001764~neuron migration | 1 | 1/43 | 157/18012 | 0.314009 | 0.342782 | 2.668049 | ENSG00000118257 | NRP2 | GO_BP |
| GO:0019827~stem cell population maintenance | 1 | 1/43 | 157/18012 | 0.314009 | 0.342782 | 2.668049 | ENSG00000128342 | LIF | GO_BP |
| GO:0048515~spermatid differentiation | 1 | 1/43 | 157/18012 | 0.314009 | 0.342782 | 2.668049 | ENSG00000164825 | DEFB1 | GO_BP |
| GO:0070838~divalent metal ion transport | 2 | 2/43 | 477/18012 | 0.315842 | 0.344587 | 1.756326 | ENSG00000124942/ENSG00000073756 | AHNAK/PTGS2 | GO_BP |
| GO:0098727~maintenance of cell number | 1 | 1/43 | 159/18012 | 0.317309 | 0.345991 | 2.634489 | ENSG00000128342 | LIF | GO_BP |
| GO:0035967~cellular response to topologically incorrect protein | 1 | 1/43 | 160/18012 | 0.318953 | 0.347192 | 2.618023 | ENSG00000055332 | EIF2AK2 | GO_BP |
| GO:0046661~male sex differentiation | 1 | 1/43 | 160/18012 | 0.318953 | 0.347192 | 2.618023 | ENSG00000122641 | INHBA | GO_BP |
| GO:0090288~negative regulation of cellular response to growth factor stimulus | 1 | 1/43 | 160/18012 | 0.318953 | 0.347192 | 2.618023 | ENSG00000145147 | SLIT2 | GO_BP |
| GO:0018393~internal peptidyl-lysine acetylation | 1 | 1/43 | 161/18012 | 0.320594 | 0.348384 | 2.601762 | ENSG00000128342 | LIF | GO_BP |
| GO:0045931~positive regulation of mitotic cell cycle | 1 | 1/43 | 161/18012 | 0.320594 | 0.348384 | 2.601762 | ENSG00000146648 | EGFR | GO_BP |
| GO:1901343~negative regulation of vasculature development | 1 | 1/43 | 161/18012 | 0.320594 | 0.348384 | 2.601762 | ENSG00000101096 | NFATC2 | GO_BP |
| GO:0072511~divalent inorganic cation transport | 2 | 2/43 | 483/18012 | 0.321145 | 0.348786 | 1.734508 | ENSG00000124942/ENSG00000073756 | AHNAK/PTGS2 | GO_BP |
| GO:0015718~monocarboxylic acid transport | 1 | 1/43 | 162/18012 | 0.32223 | 0.349371 | 2.585702 | ENSG00000240972 | MIF | GO_BP |
| GO:0051170~import into nucleus | 1 | 1/43 | 162/18012 | 0.32223 | 0.349371 | 2.585702 | ENSG00000073756 | PTGS2 | GO_BP |
| GO:0099173~postsynapse organization | 1 | 1/43 | 162/18012 | 0.32223 | 0.349371 | 2.585702 | ENSG00000118257 | NRP2 | GO_BP |
| GO:0007093~mitotic cell cycle checkpoint | 1 | 1/43 | 164/18012 | 0.325492 | 0.352708 | 2.554169 | ENSG00000174775 | HRAS | GO_BP |
| GO:0030307~positive regulation of cell growth | 1 | 1/43 | 165/18012 | 0.327117 | 0.354269 | 2.538689 | ENSG00000146648 | EGFR | GO_BP |
| GO:0006475~internal protein amino acid acetylation | 1 | 1/43 | 166/18012 | 0.328738 | 0.355423 | 2.523396 | ENSG00000128342 | LIF | GO_BP |
| GO:0006937~regulation of muscle contraction | 1 | 1/43 | 166/18012 | 0.328738 | 0.355423 | 2.523396 | ENSG00000073756 | PTGS2 | GO_BP |
| GO:0055002~striated muscle cell development | 1 | 1/43 | 166/18012 | 0.328738 | 0.355423 | 2.523396 | ENSG00000101096 | NFATC2 | GO_BP |
| GO:0043433~negative regulation of DNA-binding transcription factor activity | 1 | 1/43 | 167/18012 | 0.330355 | 0.35697 | 2.508286 | ENSG00000118503 | TNFAIP3 | GO_BP |
| GO:0050878~regulation of body fluid levels | 2 | 2/43 | 497/18012 | 0.333484 | 0.360047 | 1.685649 | ENSG00000171560/ENSG00000136244 | FGA/IL6 | GO_BP |
| GO:0018394~peptidyl-lysine acetylation | 1 | 1/43 | 169/18012 | 0.333579 | 0.360047 | 2.478602 | ENSG00000128342 | LIF | GO_BP |
| GO:0009408~response to heat | 1 | 1/43 | 171/18012 | 0.336787 | 0.363306 | 2.449612 | ENSG00000073756 | PTGS2 | GO_BP |
| GO:0001659~temperature homeostasis | 1 | 1/43 | 173/18012 | 0.33998 | 0.366133 | 2.421293 | ENSG00000073756 | PTGS2 | GO_BP |
| GO:0140013~meiotic nuclear division | 1 | 1/43 | 173/18012 | 0.33998 | 0.366133 | 2.421293 | ENSG00000128342 | LIF | GO_BP |
| GO:2000045~regulation of G1/S transition of mitotic cell cycle | 1 | 1/43 | 173/18012 | 0.33998 | 0.366133 | 2.421293 | ENSG00000146648 | EGFR | GO_BP |
| GO:0006986~response to unfolded protein | 1 | 1/43 | 174/18012 | 0.341571 | 0.367022 | 2.407378 | ENSG00000055332 | EIF2AK2 | GO_BP |
| GO:0010921~regulation of phosphatase activity | 1 | 1/43 | 174/18012 | 0.341571 | 0.367022 | 2.407378 | ENSG00000055332 | EIF2AK2 | GO_BP |
| GO:0046488~phosphatidylinositol metabolic process | 1 | 1/43 | 174/18012 | 0.341571 | 0.367022 | 2.407378 | ENSG00000184557 | SOCS3 | GO_BP |
| GO:2001252~positive regulation of chromosome organization | 1 | 1/43 | 174/18012 | 0.341571 | 0.367022 | 2.407378 | ENSG00000128342 | LIF | GO_BP |
| GO:0043409~negative regulation of MAPK cascade | 1 | 1/43 | 175/18012 | 0.343158 | 0.368521 | 2.393621 | ENSG00000128342 | LIF | GO_BP |
| GO:2001257~regulation of cation channel activity | 1 | 1/43 | 176/18012 | 0.344742 | 0.370014 | 2.380021 | ENSG00000124942 | AHNAK | GO_BP |
| GO:0048469~cell maturation | 1 | 1/43 | 178/18012 | 0.347898 | 0.373192 | 2.353279 | ENSG00000164825 | DEFB1 | GO_BP |
| GO:0008361~regulation of cell size | 1 | 1/43 | 179/18012 | 0.34947 | 0.373417 | 2.340133 | ENSG00000168685 | IL7R | GO_BP |
| GO:0022408~negative regulation of cell-cell adhesion | 1 | 1/43 | 179/18012 | 0.34947 | 0.373417 | 2.340133 | ENSG00000157873 | TNFRSF14 | GO_BP |
| GO:0055001~muscle cell development | 1 | 1/43 | 179/18012 | 0.34947 | 0.373417 | 2.340133 | ENSG00000101096 | NFATC2 | GO_BP |
| GO:0071466~cellular response to xenobiotic stimulus | 1 | 1/43 | 179/18012 | 0.34947 | 0.373417 | 2.340133 | ENSG00000146648 | EGFR | GO_BP |
| GO:1901796~regulation of signal transduction by p53 class mediator | 1 | 1/43 | 179/18012 | 0.34947 | 0.373417 | 2.340133 | ENSG00000240972 | MIF | GO_BP |
| GO:1905330~regulation of morphogenesis of an epithelium | 1 | 1/43 | 179/18012 | 0.34947 | 0.373417 | 2.340133 | ENSG00000128342 | LIF | GO_BP |
| GO:2001235~positive regulation of apoptotic signaling pathway | 1 | 1/43 | 179/18012 | 0.34947 | 0.373417 | 2.340133 | ENSG00000122641 | INHBA | GO_BP |
| GO:0050770~regulation of axonogenesis | 1 | 1/43 | 183/18012 | 0.355722 | 0.379886 | 2.288982 | ENSG00000145147 | SLIT2 | GO_BP |
| GO:0043123~positive regulation of I-kappaB kinase/NF-kappaB signaling | 1 | 1/43 | 184/18012 | 0.357276 | 0.380909 | 2.276542 | ENSG00000130303 | BST2 | GO_BP |
| GO:0043401~steroid hormone mediated signaling pathway | 1 | 1/43 | 184/18012 | 0.357276 | 0.380909 | 2.276542 | ENSG00000119508 | NR4A3 | GO_BP |
| GO:1902275~regulation of chromatin organization | 1 | 1/43 | 184/18012 | 0.357276 | 0.380909 | 2.276542 | ENSG00000128342 | LIF | GO_BP |
| GO:0019933~cAMP-mediated signaling | 1 | 1/43 | 185/18012 | 0.358826 | 0.382137 | 2.264236 | ENSG00000164825 | DEFB1 | GO_BP |
| GO:0031345~negative regulation of cell projection organization | 1 | 1/43 | 185/18012 | 0.358826 | 0.382137 | 2.264236 | ENSG00000145147 | SLIT2 | GO_BP |
| GO:0006367~transcription initiation from RNA polymerase II promoter | 1 | 1/43 | 187/18012 | 0.361916 | 0.385213 | 2.24002 | ENSG00000119508 | NR4A3 | GO_BP |
| GO:0051783~regulation of nuclear division | 1 | 1/43 | 188/18012 | 0.363455 | 0.386637 | 2.228105 | ENSG00000128342 | LIF | GO_BP |
| GO:0017148~negative regulation of translation | 1 | 1/43 | 189/18012 | 0.364991 | 0.38784 | 2.216316 | ENSG00000055332 | EIF2AK2 | GO_BP |
| GO:1903046~meiotic cell cycle process | 1 | 1/43 | 189/18012 | 0.364991 | 0.38784 | 2.216316 | ENSG00000128342 | LIF | GO_BP |
| GO:0042594~response to starvation | 1 | 1/43 | 190/18012 | 0.366523 | 0.389037 | 2.204651 | ENSG00000055332 | EIF2AK2 | GO_BP |
| GO:1902806~regulation of cell cycle G1/S phase transition | 1 | 1/43 | 190/18012 | 0.366523 | 0.389037 | 2.204651 | ENSG00000146648 | EGFR | GO_BP |
| GO:0007219~Notch signaling pathway | 1 | 1/43 | 191/18012 | 0.368051 | 0.390228 | 2.193108 | ENSG00000146648 | EGFR | GO_BP |
| GO:0045333~cellular respiration | 1 | 1/43 | 191/18012 | 0.368051 | 0.390228 | 2.193108 | ENSG00000119508 | NR4A3 | GO_BP |
| GO:0048839~inner ear development | 1 | 1/43 | 192/18012 | 0.369576 | 0.391412 | 2.181686 | ENSG00000119508 | NR4A3 | GO_BP |
| GO:0071897~DNA biosynthetic process | 1 | 1/43 | 192/18012 | 0.369576 | 0.391412 | 2.181686 | ENSG00000187608 | ISG15 | GO_BP |
| GO:0006413~translational initiation | 1 | 1/43 | 193/18012 | 0.371097 | 0.392806 | 2.170382 | ENSG00000055332 | EIF2AK2 | GO_BP |
| GO:0046890~regulation of lipid biosynthetic process | 1 | 1/43 | 196/18012 | 0.375639 | 0.397395 | 2.137162 | ENSG00000073756 | PTGS2 | GO_BP |
| GO:0035966~response to topologically incorrect protein | 1 | 1/43 | 197/18012 | 0.377146 | 0.398769 | 2.126313 | ENSG00000055332 | EIF2AK2 | GO_BP |
| GO:0017038~protein import | 1 | 1/43 | 198/18012 | 0.37865 | 0.400138 | 2.115574 | ENSG00000073756 | PTGS2 | GO_BP |
| GO:0006612~protein targeting to membrane | 1 | 1/43 | 199/18012 | 0.38015 | 0.401502 | 2.104943 | ENSG00000174775 | HRAS | GO_BP |
| GO:1902905~positive regulation of supramolecular fiber organization | 1 | 1/43 | 200/18012 | 0.381646 | 0.40286 | 2.094419 | ENSG00000106178 | CCL24 | GO_BP |
| GO:0034764~positive regulation of transmembrane transport | 1 | 1/43 | 201/18012 | 0.383139 | 0.403991 | 2.083999 | ENSG00000119508 | NR4A3 | GO_BP |
| GO:0071456~cellular response to hypoxia | 1 | 1/43 | 201/18012 | 0.383139 | 0.403991 | 2.083999 | ENSG00000073756 | PTGS2 | GO_BP |
| GO:0006473~protein acetylation | 1 | 1/43 | 203/18012 | 0.386114 | 0.406904 | 2.063467 | ENSG00000128342 | LIF | GO_BP |
| GO:0071229~cellular response to acid chemical | 1 | 1/43 | 207/18012 | 0.392022 | 0.412904 | 2.023593 | ENSG00000146648 | EGFR | GO_BP |
| GO:0035303~regulation of dephosphorylation | 1 | 1/43 | 208/18012 | 0.39349 | 0.414223 | 2.013864 | ENSG00000055332 | EIF2AK2 | GO_BP |
| GO:0034249~negative regulation of cellular amide metabolic process | 1 | 1/43 | 209/18012 | 0.394955 | 0.415537 | 2.004228 | ENSG00000055332 | EIF2AK2 | GO_BP |
| GO:0010810~regulation of cell-substrate adhesion | 1 | 1/43 | 210/18012 | 0.396416 | 0.416845 | 1.994684 | ENSG00000171560 | FGA | GO_BP |
| GO:0006888~ER to Golgi vesicle-mediated transport | 1 | 1/43 | 211/18012 | 0.397874 | 0.418149 | 1.985231 | ENSG00000109321 | AREG | GO_BP |
| GO:0043281~regulation of cysteine-type endopeptidase activity involved in apoptotic process | 1 | 1/43 | 212/18012 | 0.399328 | 0.419448 | 1.975867 | ENSG00000073756 | PTGS2 | GO_BP |
| GO:0019935~cyclic-nucleotide-mediated signaling | 1 | 1/43 | 213/18012 | 0.40078 | 0.420742 | 1.96659 | ENSG00000164825 | DEFB1 | GO_BP |
| GO:0045732~positive regulation of protein catabolic process | 1 | 1/43 | 214/18012 | 0.402227 | 0.422031 | 1.957401 | ENSG00000118503 | TNFAIP3 | GO_BP |
| GO:0000075~cell cycle checkpoint | 1 | 1/43 | 215/18012 | 0.403671 | 0.423314 | 1.948296 | ENSG00000174775 | HRAS | GO_BP |
| GO:0032869~cellular response to insulin stimulus | 1 | 1/43 | 217/18012 | 0.40655 | 0.4261 | 1.93034 | ENSG00000184557 | SOCS3 | GO_BP |
| GO:0017157~regulation of exocytosis | 1 | 1/43 | 218/18012 | 0.407984 | 0.427136 | 1.921485 | ENSG00000171560 | FGA | GO_BP |
| GO:0050807~regulation of synapse organization | 1 | 1/43 | 218/18012 | 0.407984 | 0.427136 | 1.921485 | ENSG00000118257 | NRP2 | GO_BP |
| GO:0007160~cell-matrix adhesion | 1 | 1/43 | 219/18012 | 0.409414 | 0.428166 | 1.912711 | ENSG00000171560 | FGA | GO_BP |
| GO:0043583~ear development | 1 | 1/43 | 219/18012 | 0.409414 | 0.428166 | 1.912711 | ENSG00000119508 | NR4A3 | GO_BP |
| GO:0045665~negative regulation of neuron differentiation | 1 | 1/43 | 224/18012 | 0.416517 | 0.435357 | 1.870017 | ENSG00000145147 | SLIT2 | GO_BP |
| GO:0050803~regulation of synapse structure or activity | 1 | 1/43 | 227/18012 | 0.420738 | 0.43953 | 1.845303 | ENSG00000118257 | NRP2 | GO_BP |
| GO:0009755~hormone-mediated signaling pathway | 1 | 1/43 | 236/18012 | 0.433225 | 0.452081 | 1.774931 | ENSG00000119508 | NR4A3 | GO_BP |
| GO:2000116~regulation of cysteine-type endopeptidase activity | 1 | 1/43 | 236/18012 | 0.433225 | 0.452081 | 1.774931 | ENSG00000073756 | PTGS2 | GO_BP |
| GO:0009266~response to temperature stimulus | 1 | 1/43 | 237/18012 | 0.434596 | 0.453265 | 1.767442 | ENSG00000073756 | PTGS2 | GO_BP |
| GO:0090092~regulation of transmembrane receptor protein serine/threonine kinase signaling pathway | 1 | 1/43 | 239/18012 | 0.437328 | 0.455867 | 1.752652 | ENSG00000122641 | INHBA | GO_BP |
| GO:1903362~regulation of cellular protein catabolic process | 1 | 1/43 | 243/18012 | 0.442754 | 0.461272 | 1.723801 | ENSG00000118503 | TNFAIP3 | GO_BP |
| GO:0006352~DNA-templated transcription, initiation | 1 | 1/43 | 247/18012 | 0.448129 | 0.466365 | 1.695886 | ENSG00000119508 | NR4A3 | GO_BP |
| GO:0043543~protein acylation | 1 | 1/43 | 247/18012 | 0.448129 | 0.466365 | 1.695886 | ENSG00000128342 | LIF | GO_BP |
| GO:0051321~meiotic cell cycle | 1 | 1/43 | 250/18012 | 0.452127 | 0.470271 | 1.675535 | ENSG00000128342 | LIF | GO_BP |
| GO:0090596~sensory organ morphogenesis | 1 | 1/43 | 256/18012 | 0.460038 | 0.47824 | 1.636265 | ENSG00000119508 | NR4A3 | GO_BP |
| GO:0032412~regulation of ion transmembrane transporter activity | 1 | 1/43 | 257/18012 | 0.461346 | 0.47934 | 1.629898 | ENSG00000124942 | AHNAK | GO_BP |
| GO:0031330~negative regulation of cellular catabolic process | 1 | 1/43 | 258/18012 | 0.46265 | 0.480175 | 1.62358 | ENSG00000105835 | NAMPT | GO_BP |
| GO:0072659~protein localization to plasma membrane | 1 | 1/43 | 258/18012 | 0.46265 | 0.480175 | 1.62358 | ENSG00000146648 | EGFR | GO_BP |
| GO:0007281~germ cell development | 1 | 1/43 | 260/18012 | 0.46525 | 0.482612 | 1.611091 | ENSG00000164825 | DEFB1 | GO_BP |
| GO:0022898~regulation of transmembrane transporter activity | 1 | 1/43 | 265/18012 | 0.471696 | 0.488506 | 1.580693 | ENSG00000124942 | AHNAK | GO_BP |
| GO:0031334~positive regulation of protein complex assembly | 1 | 1/43 | 265/18012 | 0.471696 | 0.488506 | 1.580693 | ENSG00000106178 | CCL24 | GO_BP |
| GO:0045165~cell fate commitment | 1 | 1/43 | 265/18012 | 0.471696 | 0.488506 | 1.580693 | ENSG00000136244 | IL6 | GO_BP |
| GO:0016485~protein processing | 1 | 1/43 | 266/18012 | 0.472976 | 0.489039 | 1.574751 | ENSG00000171560 | FGA | GO_BP |
| GO:0045927~positive regulation of growth | 1 | 1/43 | 266/18012 | 0.472976 | 0.489039 | 1.574751 | ENSG00000146648 | EGFR | GO_BP |
| GO:0072331~signal transduction by p53 class mediator | 1 | 1/43 | 266/18012 | 0.472976 | 0.489039 | 1.574751 | ENSG00000240972 | MIF | GO_BP |
| GO:0043270~positive regulation of ion transport | 1 | 1/43 | 272/18012 | 0.480593 | 0.496647 | 1.540014 | ENSG00000240972 | MIF | GO_BP |
| GO:0007162~negative regulation of cell adhesion | 1 | 1/43 | 279/18012 | 0.489344 | 0.505146 | 1.501375 | ENSG00000157873 | TNFRSF14 | GO_BP |
| GO:0032409~regulation of transporter activity | 1 | 1/43 | 279/18012 | 0.489344 | 0.505146 | 1.501375 | ENSG00000124942 | AHNAK | GO_BP |
| GO:0010976~positive regulation of neuron projection development | 1 | 1/43 | 280/18012 | 0.490582 | 0.505608 | 1.496013 | ENSG00000145147 | SLIT2 | GO_BP |
| GO:0031503~protein-containing complex localization | 1 | 1/43 | 280/18012 | 0.490582 | 0.505608 | 1.496013 | ENSG00000174775 | HRAS | GO_BP |
| GO:0060828~regulation of canonical Wnt signaling pathway | 1 | 1/43 | 280/18012 | 0.490582 | 0.505608 | 1.496013 | ENSG00000146648 | EGFR | GO_BP |
| GO:0015980~energy derivation by oxidation of organic compounds | 1 | 1/43 | 282/18012 | 0.49305 | 0.507606 | 1.485403 | ENSG00000119508 | NR4A3 | GO_BP |
| GO:0016579~protein deubiquitination | 1 | 1/43 | 282/18012 | 0.49305 | 0.507606 | 1.485403 | ENSG00000118503 | TNFAIP3 | GO_BP |
| GO:0090287~regulation of cellular response to growth factor stimulus | 1 | 1/43 | 283/18012 | 0.494279 | 0.508598 | 1.480154 | ENSG00000145147 | SLIT2 | GO_BP |
| GO:0021700~developmental maturation | 1 | 1/43 | 284/18012 | 0.495506 | 0.509314 | 1.474943 | ENSG00000164825 | DEFB1 | GO_BP |
| GO:0034976~response to endoplasmic reticulum stress | 1 | 1/43 | 284/18012 | 0.495506 | 0.509314 | 1.474943 | ENSG00000055332 | EIF2AK2 | GO_BP |
| GO:0006310~DNA recombination | 1 | 1/43 | 287/18012 | 0.499168 | 0.512804 | 1.459525 | ENSG00000168685 | IL7R | GO_BP |
| GO:0048562~embryonic organ morphogenesis | 1 | 1/43 | 288/18012 | 0.500383 | 0.513777 | 1.454457 | ENSG00000119508 | NR4A3 | GO_BP |
| GO:0051650~establishment of vesicle localization | 1 | 1/43 | 289/18012 | 0.501595 | 0.514746 | 1.449425 | ENSG00000109321 | AREG | GO_BP |
| GO:0090068~positive regulation of cell cycle process | 1 | 1/43 | 295/18012 | 0.508808 | 0.521868 | 1.419945 | ENSG00000146648 | EGFR | GO_BP |
| GO:0090305~nucleic acid phosphodiester bond hydrolysis | 1 | 1/43 | 297/18012 | 0.511189 | 0.52403 | 1.410383 | ENSG00000136244 | IL6 | GO_BP |
| GO:0070646~protein modification by small protein removal | 1 | 1/43 | 298/18012 | 0.512376 | 0.524966 | 1.40565 | ENSG00000118503 | TNFAIP3 | GO_BP |
| GO:0051648~vesicle localization | 1 | 1/43 | 305/18012 | 0.520603 | 0.533111 | 1.373389 | ENSG00000109321 | AREG | GO_BP |
| GO:0000209~protein polyubiquitination | 1 | 1/43 | 310/18012 | 0.526396 | 0.538756 | 1.351238 | ENSG00000118503 | TNFAIP3 | GO_BP |
| GO:0070588~calcium ion transmembrane transport | 1 | 1/43 | 311/18012 | 0.527547 | 0.539645 | 1.346893 | ENSG00000124942 | AHNAK | GO_BP |
| GO:0006470~protein dephosphorylation | 1 | 1/43 | 319/18012 | 0.536652 | 0.548375 | 1.313115 | ENSG00000055332 | EIF2AK2 | GO_BP |
| GO:0006650~glycerophospholipid metabolic process | 1 | 1/43 | 319/18012 | 0.536652 | 0.548375 | 1.313115 | ENSG00000184557 | SOCS3 | GO_BP |
| GO:0016050~vesicle organization | 1 | 1/43 | 322/18012 | 0.540023 | 0.551525 | 1.300881 | ENSG00000109321 | AREG | GO_BP |
| GO:0051235~maintenance of location | 1 | 1/43 | 325/18012 | 0.543369 | 0.554647 | 1.288873 | ENSG00000136244 | IL6 | GO_BP |
| GO:0010506~regulation of autophagy | 1 | 1/43 | 327/18012 | 0.545587 | 0.556614 | 1.28099 | ENSG00000105835 | NAMPT | GO_BP |
| GO:0060070~canonical Wnt signaling pathway | 1 | 1/43 | 329/18012 | 0.547794 | 0.558569 | 1.273203 | ENSG00000146648 | EGFR | GO_BP |
| GO:0015849~organic acid transport | 1 | 1/43 | 332/18012 | 0.551085 | 0.561328 | 1.261698 | ENSG00000240972 | MIF | GO_BP |
| GO:0046942~carboxylic acid transport | 1 | 1/43 | 332/18012 | 0.551085 | 0.561328 | 1.261698 | ENSG00000240972 | MIF | GO_BP |
| GO:0051604~protein maturation | 1 | 1/43 | 336/18012 | 0.555436 | 0.56546 | 1.246678 | ENSG00000171560 | FGA | GO_BP |
| GO:1904062~regulation of cation transmembrane transport | 1 | 1/43 | 338/18012 | 0.557597 | 0.567359 | 1.239301 | ENSG00000124942 | AHNAK | GO_BP |
| GO:0033044~regulation of chromosome organization | 1 | 1/43 | 342/18012 | 0.561887 | 0.571421 | 1.224806 | ENSG00000128342 | LIF | GO_BP |
| GO:0006913~nucleocytoplasmic transport | 1 | 1/43 | 343/18012 | 0.562953 | 0.572201 | 1.221235 | ENSG00000073756 | PTGS2 | GO_BP |
| GO:0051169~nuclear transport | 1 | 1/43 | 346/18012 | 0.566136 | 0.575132 | 1.210647 | ENSG00000073756 | PTGS2 | GO_BP |
| GO:0007178~transmembrane receptor protein serine/threonine kinase signaling pathway | 1 | 1/43 | 347/18012 | 0.567192 | 0.5759 | 1.207158 | ENSG00000122641 | INHBA | GO_BP |
| GO:0031589~cell-substrate adhesion | 1 | 1/43 | 348/18012 | 0.568246 | 0.576664 | 1.203689 | ENSG00000171560 | FGA | GO_BP |
| GO:0001505~regulation of neurotransmitter levels | 1 | 1/43 | 351/18012 | 0.571392 | 0.57955 | 1.193401 | ENSG00000073756 | PTGS2 | GO_BP |
| GO:0003002~regionalization | 1 | 1/43 | 352/18012 | 0.572435 | 0.579995 | 1.190011 | ENSG00000118257 | NRP2 | GO_BP |
| GO:0051260~protein homooligomerization | 1 | 1/43 | 352/18012 | 0.572435 | 0.579995 | 1.190011 | ENSG00000240972 | MIF | GO_BP |
| GO:0001666~response to hypoxia | 1 | 1/43 | 354/18012 | 0.574515 | 0.581795 | 1.183287 | ENSG00000073756 | PTGS2 | GO_BP |
| GO:0006936~muscle contraction | 1 | 1/43 | 355/18012 | 0.575551 | 0.582536 | 1.179954 | ENSG00000073756 | PTGS2 | GO_BP |
| GO:0048193~Golgi vesicle transport | 1 | 1/43 | 367/18012 | 0.587794 | 0.594614 | 1.141373 | ENSG00000109321 | AREG | GO_BP |
| GO:0045666~positive regulation of neuron differentiation | 1 | 1/43 | 368/18012 | 0.588798 | 0.595316 | 1.138271 | ENSG00000145147 | SLIT2 | GO_BP |
| GO:0051098~regulation of binding | 1 | 1/43 | 373/18012 | 0.593785 | 0.600042 | 1.123013 | ENSG00000128342 | LIF | GO_BP |
| GO:0018205~peptidyl-lysine modification | 1 | 1/43 | 395/18012 | 0.615035 | 0.621188 | 1.060465 | ENSG00000128342 | LIF | GO_BP |
| GO:0007517~muscle organ development | 1 | 1/43 | 403/18012 | 0.622489 | 0.628386 | 1.039414 | ENSG00000128342 | LIF | GO_BP |
| GO:0050808~synapse organization | 1 | 1/43 | 407/18012 | 0.626163 | 0.631763 | 1.029198 | ENSG00000118257 | NRP2 | GO_BP |
| GO:0000280~nuclear division | 1 | 1/43 | 409/18012 | 0.627987 | 0.63327 | 1.024166 | ENSG00000128342 | LIF | GO_BP |
| GO:0046486~glycerolipid metabolic process | 1 | 1/43 | 412/18012 | 0.630707 | 0.635679 | 1.016708 | ENSG00000184557 | SOCS3 | GO_BP |
| GO:0006605~protein targeting | 1 | 1/43 | 428/18012 | 0.644888 | 0.649629 | 0.9787 | ENSG00000174775 | HRAS | GO_BP |
| GO:0006644~phospholipid metabolic process | 1 | 1/43 | 431/18012 | 0.647487 | 0.651563 | 0.971888 | ENSG00000184557 | SOCS3 | GO_BP |
| GO:1901990~regulation of mitotic cell cycle phase transition | 1 | 1/43 | 431/18012 | 0.647487 | 0.651563 | 0.971888 | ENSG00000146648 | EGFR | GO_BP |
| GO:0007389~pattern specification process | 1 | 1/43 | 447/18012 | 0.661037 | 0.66485 | 0.9371 | ENSG00000118257 | NRP2 | GO_BP |
| GO:0048285~organelle fission | 1 | 1/43 | 449/18012 | 0.662695 | 0.666168 | 0.932926 | ENSG00000128342 | LIF | GO_BP |
| GO:0016570~histone modification | 1 | 1/43 | 454/18012 | 0.666804 | 0.669948 | 0.922651 | ENSG00000128342 | LIF | GO_BP |
| GO:0008380~RNA splicing | 1 | 1/43 | 463/18012 | 0.674078 | 0.676902 | 0.904716 | ENSG00000124942 | AHNAK | GO_BP |
| GO:1901987~regulation of cell cycle phase transition | 1 | 1/43 | 466/18012 | 0.676468 | 0.678946 | 0.898892 | ENSG00000146648 | EGFR | GO_BP |
| GO:0016569~covalent chromatin modification | 1 | 1/43 | 474/18012 | 0.682758 | 0.684901 | 0.883721 | ENSG00000128342 | LIF | GO_BP |
| GO:0016311~dephosphorylation | 1 | 1/43 | 476/18012 | 0.684312 | 0.686101 | 0.880008 | ENSG00000055332 | EIF2AK2 | GO_BP |
| GO:0034765~regulation of ion transmembrane transport | 1 | 1/43 | 479/18012 | 0.686629 | 0.688064 | 0.874496 | ENSG00000124942 | AHNAK | GO_BP |
| GO:0015711~organic anion transport | 1 | 1/43 | 481/18012 | 0.688164 | 0.689242 | 0.87086 | ENSG00000240972 | MIF | GO_BP |
| GO:0006914~autophagy | 1 | 1/43 | 496/18012 | 0.699447 | 0.699812 | 0.844524 | ENSG00000105835 | NAMPT | GO_BP |
| GO:0061919~process utilizing autophagic mechanism | 1 | 1/43 | 496/18012 | 0.699447 | 0.699812 | 0.844524 | ENSG00000105835 | NAMPT | GO_BP |
| GO:0010975~regulation of neuron projection development | 1 | 1/43 | 497/18012 | 0.700185 | 0.700185 | 0.842824 | ENSG00000145147 | SLIT2 | GO_BP |
| GO:0042629~mast cell granule | 3 | 3/43 | 22/18950 | 1.63E-05 | 0.001984 | 60.09514 | ENSG00000180871/ENSG00000119508/ENSG00000213658 | CXCR2/NR4A3/LAT | GO_CC |
| GO:0030667~secretory granule membrane | 6 | 6/43 | 296/18950 | 5.18E-05 | 0.002971 | 8.933061 | ENSG00000130303/ENSG00000187908/ENSG00000163464/ENSG00000180871/ENSG00000197081/ENSG00000162747 | BST2/DMBT1/CXCR1/CXCR2/IGF2R/FCGR3B | GO_CC |
| GO:0009897~external side of plasma membrane | 6 | 6/43 | 315/18950 | 7.31E-05 | 0.002971 | 8.394241 | ENSG00000171560/ENSG00000187908/ENSG00000168685/ENSG00000163464/ENSG00000180871/ENSG00000157873 | FGA/DMBT1/IL7R/CXCR1/CXCR2/TNFRSF14 | GO_CC |
| GO:0030665~clathrin-coated vesicle membrane | 4 | 4/43 | 113/18950 | 0.000124 | 0.003771 | 15.59992 | ENSG00000168685/ENSG00000109321/ENSG00000146648/ENSG00000197081 | IL7R/AREG/EGFR/IGF2R | GO_CC |
| GO:0030662~coated vesicle membrane | 4 | 4/43 | 178/18950 | 0.000698 | 0.011622 | 9.903319 | ENSG00000168685/ENSG00000109321/ENSG00000146648/ENSG00000197081 | IL7R/AREG/EGFR/IGF2R | GO_CC |
| GO:0045121~membrane raft | 5 | 5/43 | 316/18950 | 0.000715 | 0.011622 | 6.973064 | ENSG00000130303/ENSG00000124942/ENSG00000073756/ENSG00000146648/ENSG00000213658 | BST2/AHNAK/PTGS2/EGFR/LAT | GO_CC |
| GO:0098857~membrane microdomain | 5 | 5/43 | 317/18950 | 0.000726 | 0.011622 | 6.951067 | ENSG00000130303/ENSG00000124942/ENSG00000073756/ENSG00000146648/ENSG00000213658 | BST2/AHNAK/PTGS2/EGFR/LAT | GO_CC |
| GO:0030136~clathrin-coated vesicle | 4 | 4/43 | 187/18950 | 0.000839 | 0.011622 | 9.426688 | ENSG00000168685/ENSG00000109321/ENSG00000146648/ENSG00000197081 | IL7R/AREG/EGFR/IGF2R | GO_CC |
| GO:0098589~membrane region | 5 | 5/43 | 329/18950 | 0.000857 | 0.011622 | 6.697533 | ENSG00000130303/ENSG00000124942/ENSG00000073756/ENSG00000146648/ENSG00000213658 | BST2/AHNAK/PTGS2/EGFR/LAT | GO_CC |
| GO:0031983~vesicle lumen | 5 | 5/43 | 339/18950 | 0.00098 | 0.011958 | 6.499966 | ENSG00000115523/ENSG00000171560/ENSG00000240972/ENSG00000104918/ENSG00000146648 | GNLY/FGA/MIF/RETN/EGFR | GO_CC |
| GO:0030135~coated vesicle | 4 | 4/43 | 286/18950 | 0.003947 | 0.043728 | 6.163604 | ENSG00000168685/ENSG00000109321/ENSG00000146648/ENSG00000197081 | IL7R/AREG/EGFR/IGF2R | GO_CC |
| GO:0019898~extrinsic component of membrane | 4 | 4/43 | 293/18950 | 0.004301 | 0.043728 | 6.016351 | ENSG00000184557/ENSG00000187908/ENSG00000164825/ENSG00000197956 | SOCS3/DMBT1/DEFB1/S100A6 | GO_CC |
| GO:0030139~endocytic vesicle | 4 | 4/43 | 301/18950 | 0.004731 | 0.044397 | 5.856448 | ENSG00000115523/ENSG00000187908/ENSG00000146648/ENSG00000197081 | GNLY/DMBT1/EGFR/IGF2R | GO_CC |
| GO:0005771~multivesicular body | 2 | 2/43 | 52/18950 | 0.006206 | 0.053847 | 16.94991 | ENSG00000130303/ENSG00000146648 | BST2/EGFR | GO_CC |
| GO:0031225~anchored component of membrane | 3 | 3/43 | 169/18950 | 0.006621 | 0.053847 | 7.823036 | ENSG00000130303/ENSG00000173535/ENSG00000162747 | BST2/TNFRSF10C/FCGR3B | GO_CC |
| GO:0060205~cytoplasmic vesicle lumen | 4 | 4/43 | 338/18950 | 0.007097 | 0.054113 | 5.215357 | ENSG00000115523/ENSG00000171560/ENSG00000240972/ENSG00000104918 | GNLY/FGA/MIF/RETN | GO_CC |
| GO:0005770~late endosome | 3 | 3/43 | 256/18950 | 0.020211 | 0.145045 | 5.164426 | ENSG00000130303/ENSG00000146648/ENSG00000197081 | BST2/EGFR/IGF2R | GO_CC |
| GO:0002116~semaphorin receptor complex | 1 | 1/43 | 11/18950 | 0.024686 | 0.158507 | 40.06342 | ENSG00000118257 | NRP2 | GO_CC |
| GO:0042589~zymogen granule membrane | 1 | 1/43 | 11/18950 | 0.024686 | 0.158507 | 40.06342 | ENSG00000187908 | DMBT1 | GO_CC |
| GO:0043679~axon terminus | 2 | 2/43 | 120/18950 | 0.03033 | 0.180322 | 7.344961 | ENSG00000139574/ENSG00000267281 | NPFF/AC023509.3 | GO_CC |
| GO:0042588~zymogen granule | 1 | 1/43 | 14/18950 | 0.031314 | 0.180322 | 31.47841 | ENSG00000187908 | DMBT1 | GO_CC |
| GO:0005788~endoplasmic reticulum lumen | 3 | 3/43 | 308/18950 | 0.032532 | 0.180322 | 4.29251 | ENSG00000171560/ENSG00000073756/ENSG00000136244 | FGA/PTGS2/IL6 | GO_CC |
| GO:0045335~phagocytic vesicle | 2 | 2/43 | 131/18950 | 0.035611 | 0.180322 | 6.728209 | ENSG00000115523/ENSG00000187908 | GNLY/DMBT1 | GO_CC |
| GO:0034774~secretory granule lumen | 3 | 3/43 | 321/18950 | 0.036108 | 0.180322 | 4.11867 | ENSG00000171560/ENSG00000240972/ENSG00000104918 | FGA/MIF/RETN | GO_CC |
| GO:0043204~perikaryon | 2 | 2/43 | 135/18950 | 0.037614 | 0.180322 | 6.528854 | ENSG00000139574/ENSG00000267281 | NPFF/AC023509.3 | GO_CC |
| GO:0044306~neuron projection terminus | 2 | 2/43 | 139/18950 | 0.039659 | 0.180322 | 6.340974 | ENSG00000139574/ENSG00000267281 | NPFF/AC023509.3 | GO_CC |
| GO:0043034~costamere | 1 | 1/43 | 19/18950 | 0.042264 | 0.180322 | 23.19461 | ENSG00000124942 | AHNAK | GO_CC |
| GO:0071682~endocytic vesicle lumen | 1 | 1/43 | 20/18950 | 0.044439 | 0.180322 | 22.03488 | ENSG00000115523 | GNLY | GO_CC |
| GO:0005765~lysosomal membrane | 3 | 3/43 | 352/18950 | 0.045422 | 0.180322 | 3.755946 | ENSG00000130303/ENSG00000124942/ENSG00000197081 | BST2/AHNAK/IGF2R | GO_CC |
| GO:0098852~lytic vacuole membrane | 3 | 3/43 | 353/18950 | 0.04574 | 0.180322 | 3.745306 | ENSG00000130303/ENSG00000124942/ENSG00000197081 | BST2/AHNAK/IGF2R | GO_CC |
| GO:0005766~primary lysosome | 2 | 2/43 | 154/18950 | 0.047693 | 0.180322 | 5.723346 | ENSG00000130303/ENSG00000104918 | BST2/RETN | GO_CC |
| GO:0042582~azurophil granule | 2 | 2/43 | 154/18950 | 0.047693 | 0.180322 | 5.723346 | ENSG00000130303/ENSG00000104918 | BST2/RETN | GO_CC |
| GO:0097225~sperm midpiece | 1 | 1/43 | 22/18950 | 0.048776 | 0.180322 | 20.03171 | ENSG00000164825 | DEFB1 | GO_CC |
| GO:0005798~Golgi-associated vesicle | 2 | 2/43 | 174/18950 | 0.059238 | 0.202498 | 5.065491 | ENSG00000109321/ENSG00000197081 | AREG/IGF2R | GO_CC |
| GO:0005942~phosphatidylinositol 3-kinase complex | 1 | 1/43 | 27/18950 | 0.059533 | 0.202498 | 16.32214 | ENSG00000184557 | SOCS3 | GO_CC |
| GO:0043235~receptor complex | 3 | 3/43 | 395/18950 | 0.060125 | 0.202498 | 3.347071 | ENSG00000136244/ENSG00000146648/ENSG00000118257 | IL6/EGFR/NRP2 | GO_CC |
| GO:0005925~focal adhesion | 3 | 3/43 | 405/18950 | 0.063831 | 0.202498 | 3.264427 | ENSG00000124942/ENSG00000146648/ENSG00000197081 | AHNAK/EGFR/IGF2R | GO_CC |
| GO:0005924~cell-substrate adherens junction | 3 | 3/43 | 408/18950 | 0.064963 | 0.202498 | 3.240424 | ENSG00000124942/ENSG00000146648/ENSG00000197081 | AHNAK/EGFR/IGF2R | GO_CC |
| GO:0005774~vacuolar membrane | 3 | 3/43 | 409/18950 | 0.065343 | 0.202498 | 3.232501 | ENSG00000130303/ENSG00000124942/ENSG00000197081 | BST2/AHNAK/IGF2R | GO_CC |
| GO:0030055~cell-substrate junction | 3 | 3/43 | 412/18950 | 0.066488 | 0.202498 | 3.208964 | ENSG00000124942/ENSG00000146648/ENSG00000197081 | AHNAK/EGFR/IGF2R | GO_CC |
| GO:0030140~trans-Golgi network transport vesicle | 1 | 1/43 | 31/18950 | 0.068053 | 0.202498 | 14.21605 | ENSG00000197081 | IGF2R | GO_CC |
| GO:0009925~basal plasma membrane | 1 | 1/43 | 34/18950 | 0.074393 | 0.216094 | 12.9617 | ENSG00000146648 | EGFR | GO_CC |
| GO:0008180~COP9 signalosome | 1 | 1/43 | 35/18950 | 0.076497 | 0.217038 | 12.59136 | ENSG00000213658 | LAT | GO_CC |
| GO:0001772~immunological synapse | 1 | 1/43 | 36/18950 | 0.078596 | 0.217927 | 12.2416 | ENSG00000213658 | LAT | GO_CC |
| GO:0005635~nuclear envelope | 3 | 3/43 | 462/18950 | 0.086906 | 0.235611 | 2.861673 | ENSG00000197956/ENSG00000146648/ENSG00000197081 | S100A6/EGFR/IGF2R | GO_CC |
| GO:0030118~clathrin coat | 1 | 1/43 | 46/18950 | 0.099336 | 0.263456 | 9.580384 | ENSG00000197081 | IGF2R | GO_CC |
| GO:0045178~basal part of cell | 1 | 1/43 | 51/18950 | 0.109534 | 0.283548 | 8.641131 | ENSG00000146648 | EGFR | GO_CC |
| GO:0030315~T-tubule | 1 | 1/43 | 52/18950 | 0.11156 | 0.283548 | 8.474955 | ENSG00000124942 | AHNAK | GO_CC |
| GO:0035577~azurophil granule membrane | 1 | 1/43 | 57/18950 | 0.121623 | 0.301638 | 7.731538 | ENSG00000130303 | BST2 | GO_CC |
| GO:0012507~ER to Golgi transport vesicle membrane | 1 | 1/43 | 58/18950 | 0.123622 | 0.301638 | 7.598236 | ENSG00000109321 | AREG | GO_CC |
| GO:0035580~specific granule lumen | 1 | 1/43 | 62/18950 | 0.131574 | 0.314747 | 7.108027 | ENSG00000104918 | RETN | GO_CC |
| GO:0150034~distal axon | 2 | 2/43 | 286/18950 | 0.137215 | 0.321928 | 3.081802 | ENSG00000139574/ENSG00000267281 | NPFF/AC023509.3 | GO_CC |
| GO:0031093~platelet alpha granule lumen | 1 | 1/43 | 67/18950 | 0.141416 | 0.325523 | 6.577577 | ENSG00000171560 | FGA | GO_CC |
| GO:0033116~endoplasmic reticulum-Golgi intermediate compartment membrane | 1 | 1/43 | 70/18950 | 0.147268 | 0.330975 | 6.295681 | ENSG00000109321 | AREG | GO_CC |
| GO:0044291~cell-cell contact zone | 1 | 1/43 | 71/18950 | 0.14921 | 0.330975 | 6.207009 | ENSG00000124942 | AHNAK | GO_CC |
| GO:0030670~phagocytic vesicle membrane | 1 | 1/43 | 75/18950 | 0.156936 | 0.341896 | 5.875969 | ENSG00000187908 | DMBT1 | GO_CC |
| GO:0016324~apical plasma membrane | 2 | 2/43 | 319/18950 | 0.163182 | 0.343739 | 2.762995 | ENSG00000130303/ENSG00000146648 | BST2/EGFR | GO_CC |
| GO:0005901~caveola | 1 | 1/43 | 81/18950 | 0.168395 | 0.343739 | 5.440712 | ENSG00000073756 | PTGS2 | GO_CC |
| GO:0031970~organelle envelope lumen | 1 | 1/43 | 88/18950 | 0.181573 | 0.343739 | 5.007928 | ENSG00000197081 | IGF2R | GO_CC |
| GO:0030134~COPII-coated ER to Golgi transport vesicle | 1 | 1/43 | 89/18950 | 0.183439 | 0.343739 | 4.951659 | ENSG00000109321 | AREG | GO_CC |
| GO:0031234~extrinsic component of cytoplasmic side of plasma membrane | 1 | 1/43 | 90/18950 | 0.1853 | 0.343739 | 4.896641 | ENSG00000197956 | S100A6 | GO_CC |
| GO:0032588~trans-Golgi network membrane | 1 | 1/43 | 90/18950 | 0.1853 | 0.343739 | 4.896641 | ENSG00000197081 | IGF2R | GO_CC |
| GO:0005769~early endosome | 2 | 2/43 | 348/18950 | 0.186686 | 0.343739 | 2.532745 | ENSG00000146648/ENSG00000197081 | EGFR/IGF2R | GO_CC |
| GO:0031091~platelet alpha granule | 1 | 1/43 | 91/18950 | 0.187158 | 0.343739 | 4.842832 | ENSG00000171560 | FGA | GO_CC |
| GO:0035578~azurophil granule lumen | 1 | 1/43 | 91/18950 | 0.187158 | 0.343739 | 4.842832 | ENSG00000104918 | RETN | GO_CC |
| GO:0098978~glutamatergic synapse | 2 | 2/43 | 349/18950 | 0.187505 | 0.343739 | 2.525488 | ENSG00000174775/ENSG00000118257 | HRAS/NRP2 | GO_CC |
| GO:0036126~sperm flagellum | 1 | 1/43 | 93/18950 | 0.19086 | 0.343739 | 4.738685 | ENSG00000164825 | DEFB1 | GO_CC |
| GO:0030117~membrane coat | 1 | 1/43 | 96/18950 | 0.196383 | 0.343739 | 4.590601 | ENSG00000197081 | IGF2R | GO_CC |
| GO:0048475~coated membrane | 1 | 1/43 | 96/18950 | 0.196383 | 0.343739 | 4.590601 | ENSG00000197081 | IGF2R | GO_CC |
| GO:0005667~transcription factor complex | 2 | 2/43 | 362/18950 | 0.198208 | 0.343739 | 2.434794 | ENSG00000101096/ENSG00000119508 | NFATC2/NR4A3 | GO_CC |
| GO:0097729~9+2 motile cilium | 1 | 1/43 | 98/18950 | 0.200045 | 0.343739 | 4.496915 | ENSG00000164825 | DEFB1 | GO_CC |
| GO:0005796~Golgi lumen | 1 | 1/43 | 102/18950 | 0.207319 | 0.346721 | 4.320565 | ENSG00000164825 | DEFB1 | GO_CC |
| GO:0033267~axon part | 2 | 2/43 | 382/18950 | 0.214822 | 0.346721 | 2.307318 | ENSG00000139574/ENSG00000267281 | NPFF/AC023509.3 | GO_CC |
| GO:0045177~apical part of cell | 2 | 2/43 | 386/18950 | 0.218162 | 0.346721 | 2.283408 | ENSG00000130303/ENSG00000146648 | BST2/EGFR | GO_CC |
| GO:0022626~cytosolic ribosome | 1 | 1/43 | 109/18950 | 0.219894 | 0.346721 | 4.043098 | ENSG00000055332 | EIF2AK2 | GO_CC |
| GO:0030133~transport vesicle | 2 | 2/43 | 389/18950 | 0.220671 | 0.346721 | 2.265798 | ENSG00000109321/ENSG00000197081 | AREG/IGF2R | GO_CC |
| GO:0030660~Golgi-associated vesicle membrane | 1 | 1/43 | 110/18950 | 0.221674 | 0.346721 | 4.006342 | ENSG00000109321 | AREG | GO_CC |
| GO:0044853~plasma membrane raft | 1 | 1/43 | 110/18950 | 0.221674 | 0.346721 | 4.006342 | ENSG00000073756 | PTGS2 | GO_CC |
| GO:0016607~nuclear speck | 2 | 2/43 | 397/18950 | 0.227375 | 0.348287 | 2.220139 | ENSG00000144802/ENSG00000105835 | NFKBIZ/NAMPT | GO_CC |
| GO:0072562~blood microparticle | 1 | 1/43 | 114/18950 | 0.228756 | 0.348287 | 3.865769 | ENSG00000171560 | FGA | GO_CC |
| GO:0099055~integral component of postsynaptic membrane | 1 | 1/43 | 117/18950 | 0.234026 | 0.348287 | 3.766647 | ENSG00000118257 | NRP2 | GO_CC |
| GO:0062023~collagen-containing extracellular matrix | 2 | 2/43 | 405/18950 | 0.234095 | 0.348287 | 2.176285 | ENSG00000171560/ENSG00000197956 | FGA/S100A6 | GO_CC |
| GO:0098936~intrinsic component of postsynaptic membrane | 1 | 1/43 | 122/18950 | 0.242732 | 0.355822 | 3.612276 | ENSG00000118257 | NRP2 | GO_CC |
| GO:1904813~ficolin-1-rich granule lumen | 1 | 1/43 | 124/18950 | 0.246187 | 0.355822 | 3.554014 | ENSG00000240972 | MIF | GO_CC |
| GO:0005793~endoplasmic reticulum-Golgi intermediate compartment | 1 | 1/43 | 125/18950 | 0.247909 | 0.355822 | 3.525581 | ENSG00000109321 | AREG | GO_CC |
| GO:0042383~sarcolemma | 1 | 1/43 | 136/18950 | 0.266597 | 0.378195 | 3.240424 | ENSG00000124942 | AHNAK | GO_CC |
| GO:0005911~cell-cell junction | 2 | 2/43 | 459/18950 | 0.279693 | 0.392213 | 1.920251 | ENSG00000124942/ENSG00000213658 | AHNAK/LAT | GO_CC |
| GO:0031901~early endosome membrane | 1 | 1/43 | 147/18950 | 0.28483 | 0.394879 | 2.997943 | ENSG00000146648 | EGFR | GO_CC |
| GO:0099699~integral component of synaptic membrane | 1 | 1/43 | 152/18950 | 0.292971 | 0.396681 | 2.899327 | ENSG00000118257 | NRP2 | GO_CC |
| GO:0009898~cytoplasmic side of plasma membrane | 1 | 1/43 | 153/18950 | 0.294589 | 0.396681 | 2.880377 | ENSG00000197956 | S100A6 | GO_CC |
| GO:0042581~specific granule | 1 | 1/43 | 159/18950 | 0.304217 | 0.396681 | 2.771683 | ENSG00000104918 | RETN | GO_CC |
| GO:0098793~presynapse | 2 | 2/43 | 493/18950 | 0.3084 | 0.396681 | 1.78782 | ENSG00000139574/ENSG00000267281 | NPFF/AC023509.3 | GO_CC |
| GO:0019897~extrinsic component of plasma membrane | 1 | 1/43 | 163/18950 | 0.310564 | 0.396681 | 2.703667 | ENSG00000197956 | S100A6 | GO_CC |
| GO:0043025~neuronal cell body | 2 | 2/43 | 497/18950 | 0.311768 | 0.396681 | 1.773431 | ENSG00000139574/ENSG00000267281 | NPFF/AC023509.3 | GO_CC |
| GO:0030666~endocytic vesicle membrane | 1 | 1/43 | 164/18950 | 0.312142 | 0.396681 | 2.687181 | ENSG00000187908 | DMBT1 | GO_CC |
| GO:0099240~intrinsic component of synaptic membrane | 1 | 1/43 | 164/18950 | 0.312142 | 0.396681 | 2.687181 | ENSG00000118257 | NRP2 | GO_CC |
| GO:0005775~vacuolar lumen | 1 | 1/43 | 172/18950 | 0.32464 | 0.40799 | 2.562196 | ENSG00000104918 | RETN | GO_CC |
| GO:0001726~ruffle | 1 | 1/43 | 174/18950 | 0.32773 | 0.40799 | 2.532745 | ENSG00000197956 | S100A6 | GO_CC |
| GO:0098562~cytoplasmic side of membrane | 1 | 1/43 | 177/18950 | 0.332338 | 0.409548 | 2.489817 | ENSG00000197956 | S100A6 | GO_CC |
| GO:0031514~motile cilium | 1 | 1/43 | 180/18950 | 0.336916 | 0.411037 | 2.44832 | ENSG00000164825 | DEFB1 | GO_CC |
| GO:0101002~ficolin-1-rich granule | 1 | 1/43 | 184/18950 | 0.342972 | 0.412022 | 2.395096 | ENSG00000240972 | MIF | GO_CC |
| GO:0098802~plasma membrane receptor complex | 1 | 1/43 | 185/18950 | 0.344477 | 0.412022 | 2.38215 | ENSG00000136244 | IL6 | GO_CC |
| GO:0097223~sperm part | 1 | 1/43 | 191/18950 | 0.35344 | 0.418637 | 2.307318 | ENSG00000164825 | DEFB1 | GO_CC |
| GO:0044798~nuclear transcription factor complex | 1 | 1/43 | 199/18950 | 0.365204 | 0.428412 | 2.214561 | ENSG00000101096 | NFATC2 | GO_CC |
| GO:0030658~transport vesicle membrane | 1 | 1/43 | 203/18950 | 0.371007 | 0.431075 | 2.170925 | ENSG00000109321 | AREG | GO_CC |
| GO:0036464~cytoplasmic ribonucleoprotein granule | 1 | 1/43 | 211/18950 | 0.382459 | 0.440188 | 2.088615 | ENSG00000144802 | NFKBIZ | GO_CC |
| GO:0016323~basolateral plasma membrane | 1 | 1/43 | 217/18950 | 0.390913 | 0.44281 | 2.030865 | ENSG00000146648 | EGFR | GO_CC |
| GO:0044449~contractile fiber part | 1 | 1/43 | 221/18950 | 0.396487 | 0.44281 | 1.994107 | ENSG00000124942 | AHNAK | GO_CC |
| GO:0035770~ribonucleoprotein granule | 1 | 1/43 | 222/18950 | 0.397873 | 0.44281 | 1.985125 | ENSG00000144802 | NFKBIZ | GO_CC |
| GO:0030016~myofibril | 1 | 1/43 | 223/18950 | 0.399255 | 0.44281 | 1.976223 | ENSG00000124942 | AHNAK | GO_CC |
| GO:0043292~contractile fiber | 1 | 1/43 | 233/18950 | 0.412911 | 0.45383 | 1.891406 | ENSG00000124942 | AHNAK | GO_CC |
| GO:0005802~trans-Golgi network | 1 | 1/43 | 236/18950 | 0.416948 | 0.454175 | 1.867363 | ENSG00000197081 | IGF2R | GO_CC |
| GO:0044445~cytosolic part | 1 | 1/43 | 243/18950 | 0.426263 | 0.460213 | 1.813571 | ENSG00000055332 | EIF2AK2 | GO_CC |
| GO:0005840~ribosome | 1 | 1/43 | 248/18950 | 0.432827 | 0.463201 | 1.777007 | ENSG00000055332 | EIF2AK2 | GO_CC |
| GO:0061695~transferase complex, transferring phosphorus-containing groups | 1 | 1/43 | 257/18950 | 0.444459 | 0.471513 | 1.714777 | ENSG00000184557 | SOCS3 | GO_CC |
| GO:0031965~nuclear membrane | 1 | 1/43 | 296/18950 | 0.492227 | 0.517687 | 1.488843 | ENSG00000146648 | EGFR | GO_CC |
| GO:0045211~postsynaptic membrane | 1 | 1/43 | 323/18950 | 0.522922 | 0.545269 | 1.364389 | ENSG00000118257 | NRP2 | GO_CC |
| GO:0000790~nuclear chromatin | 1 | 1/43 | 373/18950 | 0.57505 | 0.594543 | 1.181495 | ENSG00000101096 | NFATC2 | GO_CC |
| GO:0031252~cell leading edge | 1 | 1/43 | 404/18950 | 0.60453 | 0.619771 | 1.090836 | ENSG00000197956 | S100A6 | GO_CC |
| GO:0097060~synaptic membrane | 1 | 1/43 | 432/18950 | 0.629434 | 0.639924 | 1.020134 | ENSG00000118257 | NRP2 | GO_CC |
| GO:0044441~ciliary part | 1 | 1/43 | 462/18950 | 0.654417 | 0.659825 | 0.953891 | ENSG00000164825 | DEFB1 | GO_CC |
| GO:0010008~endosome membrane | 1 | 1/43 | 476/18950 | 0.665505 | 0.665505 | 0.925835 | ENSG00000146648 | EGFR | GO_CC |
| GO:0048018~receptor ligand activity | 11 | 11/42 | 483/17293 | 1.41E-08 | 2.23E-06 | 9.377058 | ENSG00000106178/ENSG00000136244/ENSG00000240972/ENSG00000109321/ENSG00000122641/ENSG00000128342/ENSG00000105835/ENSG00000139574/ENSG00000267281/ENSG00000104918/ENSG00000161055 | CCL24/IL6/MIF/AREG/INHBA/LIF/NAMPT/NPFF/AC023509.3/RETN/SCGB3A1 | GO_MF |
| GO:0005125~cytokine activity | 8 | 8/42 | 220/17293 | 4.92E-08 | 3.88E-06 | 14.97229 | ENSG00000106178/ENSG00000136244/ENSG00000240972/ENSG00000109321/ENSG00000122641/ENSG00000128342/ENSG00000105835/ENSG00000161055 | CCL24/IL6/MIF/AREG/INHBA/LIF/NAMPT/SCGB3A1 | GO_MF |
| GO:0005126~cytokine receptor binding | 6 | 6/42 | 287/17293 | 6.30E-05 | 0.003316 | 8.607765 | ENSG00000106178/ENSG00000136244/ENSG00000240972/ENSG00000164825/ENSG00000122641/ENSG00000128342 | CCL24/IL6/MIF/DEFB1/INHBA/LIF | GO_MF |
| GO:0004896~cytokine receptor activity | 4 | 4/42 | 97/17293 | 8.84E-05 | 0.003492 | 16.97889 | ENSG00000168685/ENSG00000163464/ENSG00000180871/ENSG00000187266 | IL7R/CXCR1/CXCR2/EPOR | GO_MF |
| GO:0005179~hormone activity | 4 | 4/42 | 122/17293 | 0.000215 | 0.006778 | 13.49961 | ENSG00000122641/ENSG00000139574/ENSG00000267281/ENSG00000104918 | INHBA/NPFF/AC023509.3/RETN | GO_MF |
| GO:0019955~cytokine binding | 4 | 4/42 | 128/17293 | 0.000258 | 0.006789 | 12.86682 | ENSG00000163464/ENSG00000180871/ENSG00000118257/ENSG00000157873 | CXCR1/CXCR2/NRP2/TNFRSF14 | GO_MF |
| GO:0004713~protein tyrosine kinase activity | 4 | 4/42 | 134/17293 | 0.000307 | 0.006931 | 12.29069 | ENSG00000055332/ENSG00000146648/ENSG00000197081/ENSG00000118257 | EIF2AK2/EGFR/IGF2R/NRP2 | GO_MF |
| GO:0004714~transmembrane receptor protein tyrosine kinase activity | 3 | 3/42 | 62/17293 | 0.000456 | 0.009006 | 19.92281 | ENSG00000146648/ENSG00000197081/ENSG00000118257 | EGFR/IGF2R/NRP2 | GO_MF |
| GO:0044548~S100 protein binding | 2 | 2/42 | 14/17293 | 0.000514 | 0.009031 | 58.81973 | ENSG00000124942/ENSG00000197956 | AHNAK/S100A6 | GO_MF |
| GO:0008083~growth factor activity | 4 | 4/42 | 164/17293 | 0.000659 | 0.010414 | 10.04239 | ENSG00000136244/ENSG00000109321/ENSG00000122641/ENSG00000128342 | IL6/AREG/INHBA/LIF | GO_MF |
| GO:0019199~transmembrane receptor protein kinase activity | 3 | 3/42 | 79/17293 | 0.000927 | 0.013309 | 15.63562 | ENSG00000146648/ENSG00000197081/ENSG00000118257 | EGFR/IGF2R/NRP2 | GO_MF |
| GO:0016493~C-C chemokine receptor activity | 2 | 2/42 | 23/17293 | 0.001411 | 0.018572 | 35.80331 | ENSG00000163464/ENSG00000180871 | CXCR1/CXCR2 | GO_MF |
| GO:0019957~C-C chemokine binding | 2 | 2/42 | 24/17293 | 0.001536 | 0.018673 | 34.31151 | ENSG00000163464/ENSG00000180871 | CXCR1/CXCR2 | GO_MF |
| GO:0001637~G protein-coupled chemoattractant receptor activity | 2 | 2/42 | 26/17293 | 0.001804 | 0.018998 | 31.67216 | ENSG00000163464/ENSG00000180871 | CXCR1/CXCR2 | GO_MF |
| GO:0004950~chemokine receptor activity | 2 | 2/42 | 26/17293 | 0.001804 | 0.018998 | 31.67216 | ENSG00000163464/ENSG00000180871 | CXCR1/CXCR2 | GO_MF |
| GO:0005184~neuropeptide hormone activity | 2 | 2/42 | 28/17293 | 0.002091 | 0.020651 | 29.40986 | ENSG00000139574/ENSG00000267281 | NPFF/AC023509.3 | GO_MF |
| GO:0019956~chemokine binding | 2 | 2/42 | 32/17293 | 0.002727 | 0.025348 | 25.73363 | ENSG00000163464/ENSG00000180871 | CXCR1/CXCR2 | GO_MF |
| GO:0019838~growth factor binding | 3 | 3/42 | 137/17293 | 0.004456 | 0.038569 | 9.016163 | ENSG00000146648/ENSG00000197081/ENSG00000118257 | EGFR/IGF2R/NRP2 | GO_MF |
| GO:0001664~G protein-coupled receptor binding | 4 | 4/42 | 280/17293 | 0.004643 | 0.038569 | 5.881973 | ENSG00000106178/ENSG00000164825/ENSG00000139574/ENSG00000267281 | CCL24/DEFB1/NPFF/AC023509.3 | GO_MF |
| GO:0048020~CCR chemokine receptor binding | 2 | 2/42 | 43/17293 | 0.004882 | 0.038569 | 19.15061 | ENSG00000106178/ENSG00000164825 | CCL24/DEFB1 | GO_MF |
| GO:0048306~calcium-dependent protein binding | 2 | 2/42 | 61/17293 | 0.009625 | 0.072416 | 13.49961 | ENSG00000187908/ENSG00000197956 | DMBT1/S100A6 | GO_MF |
| GO:0042379~chemokine receptor binding | 2 | 2/42 | 66/17293 | 0.011196 | 0.080405 | 12.47691 | ENSG00000106178/ENSG00000164825 | CCL24/DEFB1 | GO_MF |
| GO:0001618~virus receptor activity | 2 | 2/42 | 74/17293 | 0.013926 | 0.091683 | 11.12806 | ENSG00000146648/ENSG00000157873 | EGFR/TNFRSF14 | GO_MF |
| GO:0104005~hijacked molecular function | 2 | 2/42 | 74/17293 | 0.013926 | 0.091683 | 11.12806 | ENSG00000146648/ENSG00000157873 | EGFR/TNFRSF14 | GO_MF |
| GO:0051219~phosphoprotein binding | 2 | 2/42 | 83/17293 | 0.017307 | 0.109379 | 9.9214 | ENSG00000184557/ENSG00000197081 | SOCS3/IGF2R | GO_MF |
| GO:0019864~IgG binding | 1 | 1/42 | 10/17293 | 0.02403 | 0.139048 | 41.17381 | ENSG00000162747 | FCGR3B | GO_MF |
| GO:0042562~hormone binding | 2 | 2/42 | 103/17293 | 0.025914 | 0.139048 | 7.994914 | ENSG00000122641/ENSG00000146648 | INHBA/EGFR | GO_MF |
| GO:0005035~death receptor activity | 1 | 1/42 | 11/17293 | 0.026401 | 0.139048 | 37.43074 | ENSG00000157873 | TNFRSF14 | GO_MF |
| GO:0031386~protein tag | 1 | 1/42 | 11/17293 | 0.026401 | 0.139048 | 37.43074 | ENSG00000187608 | ISG15 | GO_MF |
| GO:0097493~structural molecule activity conferring elasticity | 1 | 1/42 | 11/17293 | 0.026401 | 0.139048 | 37.43074 | ENSG00000124942 | AHNAK | GO_MF |
| GO:0017154~semaphorin receptor activity | 1 | 1/42 | 12/17293 | 0.028768 | 0.14204 | 34.31151 | ENSG00000118257 | NRP2 | GO_MF |
| GO:0061578~Lys63-specific deubiquitinase activity | 1 | 1/42 | 12/17293 | 0.028768 | 0.14204 | 34.31151 | ENSG00000118503 | TNFAIP3 | GO_MF |
| GO:0050839~cell adhesion molecule binding | 4 | 4/42 | 497/17293 | 0.031914 | 0.142981 | 3.313787 | ENSG00000187608/ENSG00000124942/ENSG00000171560/ENSG00000146648 | ISG15/AHNAK/FGA/EGFR | GO_MF |
| GO:0005095~GTPase inhibitor activity | 1 | 1/42 | 14/17293 | 0.033483 | 0.142981 | 29.40986 | ENSG00000145147 | SLIT2 | GO_MF |
| GO:0016863~intramolecular oxidoreductase activity, transposing C=C bonds | 1 | 1/42 | 14/17293 | 0.033483 | 0.142981 | 29.40986 | ENSG00000240972 | MIF | GO_MF |
| GO:0035497~cAMP response element binding | 1 | 1/42 | 14/17293 | 0.033483 | 0.142981 | 29.40986 | ENSG00000119508 | NR4A3 | GO_MF |
| GO:0046935~1-phosphatidylinositol-3-kinase regulator activity | 1 | 1/42 | 14/17293 | 0.033483 | 0.142981 | 29.40986 | ENSG00000184557 | SOCS3 | GO_MF |
| GO:0005523~tropomyosin binding | 1 | 1/42 | 15/17293 | 0.035832 | 0.147117 | 27.44921 | ENSG00000197956 | S100A6 | GO_MF |
| GO:0002020~protease binding | 2 | 2/42 | 127/17293 | 0.03806 | 0.147117 | 6.484064 | ENSG00000118503/ENSG00000240972 | TNFAIP3/MIF | GO_MF |
| GO:0008191~metalloendopeptidase inhibitor activity | 1 | 1/42 | 16/17293 | 0.038176 | 0.147117 | 25.73363 | ENSG00000130303 | BST2 | GO_MF |
| GO:0035259~glucocorticoid receptor binding | 1 | 1/42 | 16/17293 | 0.038176 | 0.147117 | 25.73363 | ENSG00000119508 | NR4A3 | GO_MF |
| GO:0035014~phosphatidylinositol 3-kinase regulator activity | 1 | 1/42 | 17/17293 | 0.040514 | 0.149985 | 24.21989 | ENSG00000184557 | SOCS3 | GO_MF |
| GO:0005178~integrin binding | 2 | 2/42 | 132/17293 | 0.040819 | 0.149985 | 6.238456 | ENSG00000187608/ENSG00000146648 | ISG15/EGFR | GO_MF |
| GO:0070851~growth factor receptor binding | 2 | 2/42 | 134/17293 | 0.041943 | 0.150613 | 6.145345 | ENSG00000136244/ENSG00000109321 | IL6/AREG | GO_MF |
| GO:0001972~retinoic acid binding | 1 | 1/42 | 19/17293 | 0.045174 | 0.155163 | 21.67043 | ENSG00000197081 | IGF2R | GO_MF |
| GO:0070696~transmembrane receptor protein serine/threonine kinase binding | 1 | 1/42 | 19/17293 | 0.045174 | 0.155163 | 21.67043 | ENSG00000122641 | INHBA | GO_MF |
| GO:0008329~signaling pattern recognition receptor activity | 1 | 1/42 | 20/17293 | 0.047495 | 0.159086 | 20.5869 | ENSG00000187908 | DMBT1 | GO_MF |
| GO:0008528~G protein-coupled peptide receptor activity | 2 | 2/42 | 145/17293 | 0.04833 | 0.159086 | 5.679146 | ENSG00000163464/ENSG00000180871 | CXCR1/CXCR2 | GO_MF |
| GO:0038187~pattern recognition receptor activity | 1 | 1/42 | 21/17293 | 0.049812 | 0.15925 | 19.60658 | ENSG00000187908 | DMBT1 | GO_MF |
| GO:0005537~mannose binding | 1 | 1/42 | 22/17293 | 0.052122 | 0.15925 | 18.71537 | ENSG00000197081 | IGF2R | GO_MF |
| GO:0070530~K63-linked polyubiquitin modification-dependent protein binding | 1 | 1/42 | 22/17293 | 0.052122 | 0.15925 | 18.71537 | ENSG00000118503 | TNFAIP3 | GO_MF |
| GO:0001653~peptide receptor activity | 2 | 2/42 | 152/17293 | 0.052568 | 0.15925 | 5.417607 | ENSG00000163464/ENSG00000180871 | CXCR1/CXCR2 | GO_MF |
| GO:0001223~transcription coactivator binding | 1 | 1/42 | 23/17293 | 0.054427 | 0.15925 | 17.90166 | ENSG00000119508 | NR4A3 | GO_MF |
| GO:0019865~immunoglobulin binding | 1 | 1/42 | 23/17293 | 0.054427 | 0.15925 | 17.90166 | ENSG00000162747 | FCGR3B | GO_MF |
| GO:0001965~G-protein alpha-subunit binding | 1 | 1/42 | 25/17293 | 0.059021 | 0.166523 | 16.46952 | ENSG00000197081 | IGF2R | GO_MF |
| GO:0033612~receptor serine/threonine kinase binding | 1 | 1/42 | 25/17293 | 0.059021 | 0.166523 | 16.46952 | ENSG00000122641 | INHBA | GO_MF |
| GO:0004709~MAP kinase kinase kinase activity | 1 | 1/42 | 26/17293 | 0.06131 | 0.167461 | 15.83608 | ENSG00000146648 | EGFR | GO_MF |
| GO:0004857~enzyme inhibitor activity | 3 | 3/42 | 373/17293 | 0.06162 | 0.167461 | 3.311566 | ENSG00000184557/ENSG00000130303/ENSG00000145147 | SOCS3/BST2/SLIT2 | GO_MF |
| GO:0008201~heparin binding | 2 | 2/42 | 169/17293 | 0.063385 | 0.167461 | 4.87264 | ENSG00000145147/ENSG00000118257 | SLIT2/NRP2 | GO_MF |
| GO:0016702~oxidoreductase activity, acting on single donors with incorporation of molecular oxygen, incorporation of two atoms of oxygen | 1 | 1/42 | 27/17293 | 0.063593 | 0.167461 | 15.24956 | ENSG00000073756 | PTGS2 | GO_MF |
| GO:0005520~insulin-like growth factor binding | 1 | 1/42 | 28/17293 | 0.065871 | 0.167864 | 14.70493 | ENSG00000197081 | IGF2R | GO_MF |
| GO:0016701~oxidoreductase activity, acting on single donors with incorporation of molecular oxygen | 1 | 1/42 | 28/17293 | 0.065871 | 0.167864 | 14.70493 | ENSG00000073756 | PTGS2 | GO_MF |
| GO:0035035~histone acetyltransferase binding | 1 | 1/42 | 29/17293 | 0.068143 | 0.168228 | 14.19787 | ENSG00000119508 | NR4A3 | GO_MF |
| GO:0043236~laminin binding | 1 | 1/42 | 29/17293 | 0.068143 | 0.168228 | 14.19787 | ENSG00000145147 | SLIT2 | GO_MF |
| GO:0019902~phosphatase binding | 2 | 2/42 | 185/17293 | 0.074191 | 0.18034 | 4.451223 | ENSG00000101096/ENSG00000146648 | NFATC2/EGFR | GO_MF |
| GO:0005154~epidermal growth factor receptor binding | 1 | 1/42 | 33/17293 | 0.077179 | 0.184762 | 12.47691 | ENSG00000109321 | AREG | GO_MF |
| GO:0005501~retinoid binding | 1 | 1/42 | 35/17293 | 0.081665 | 0.192118 | 11.76395 | ENSG00000197081 | IGF2R | GO_MF |
| GO:0019840~isoprenoid binding | 1 | 1/42 | 36/17293 | 0.0839 | 0.192118 | 11.43717 | ENSG00000197081 | IGF2R | GO_MF |
| GO:0043394~proteoglycan binding | 1 | 1/42 | 36/17293 | 0.0839 | 0.192118 | 11.43717 | ENSG00000145147 | SLIT2 | GO_MF |
| GO:0042056~chemoattractant activity | 1 | 1/42 | 39/17293 | 0.090573 | 0.204435 | 10.55739 | ENSG00000240972 | MIF | GO_MF |
| GO:0001784~phosphotyrosine residue binding | 1 | 1/42 | 40/17293 | 0.092786 | 0.206482 | 10.29345 | ENSG00000184557 | SOCS3 | GO_MF |
| GO:0001221~transcription cofactor binding | 1 | 1/42 | 43/17293 | 0.099396 | 0.218119 | 9.575305 | ENSG00000119508 | NR4A3 | GO_MF |
| GO:0005539~glycosaminoglycan binding | 2 | 2/42 | 228/17293 | 0.105788 | 0.218966 | 3.611738 | ENSG00000145147/ENSG00000118257 | SLIT2/NRP2 | GO_MF |
| GO:0004715~non-membrane spanning protein tyrosine kinase activity | 1 | 1/42 | 46/17293 | 0.105959 | 0.218966 | 8.950828 | ENSG00000055332 | EIF2AK2 | GO_MF |
| GO:0004879~nuclear receptor activity | 1 | 1/42 | 47/17293 | 0.108136 | 0.218966 | 8.760385 | ENSG00000119508 | NR4A3 | GO_MF |
| GO:0016763~transferase activity, transferring pentosyl groups | 1 | 1/42 | 47/17293 | 0.108136 | 0.218966 | 8.760385 | ENSG00000105835 | NAMPT | GO_MF |
| GO:0016860~intramolecular oxidoreductase activity | 1 | 1/42 | 47/17293 | 0.108136 | 0.218966 | 8.760385 | ENSG00000240972 | MIF | GO_MF |
| GO:0098531~transcription factor activity, direct ligand regulated sequence-specific DNA binding | 1 | 1/42 | 47/17293 | 0.108136 | 0.218966 | 8.760385 | ENSG00000119508 | NR4A3 | GO_MF |
| GO:0008009~chemokine activity | 1 | 1/42 | 48/17293 | 0.110308 | 0.218966 | 8.577877 | ENSG00000106178 | CCL24 | GO_MF |
| GO:0017046~peptide hormone binding | 1 | 1/42 | 50/17293 | 0.114636 | 0.218966 | 8.234762 | ENSG00000122641 | INHBA | GO_MF |
| GO:0004601~peroxidase activity | 1 | 1/42 | 51/17293 | 0.116793 | 0.218966 | 8.073296 | ENSG00000073756 | PTGS2 | GO_MF |
| GO:0005044~scavenger receptor activity | 1 | 1/42 | 51/17293 | 0.116793 | 0.218966 | 8.073296 | ENSG00000187908 | DMBT1 | GO_MF |
| GO:0045309~protein phosphorylated amino acid binding | 1 | 1/42 | 51/17293 | 0.116793 | 0.218966 | 8.073296 | ENSG00000184557 | SOCS3 | GO_MF |
| GO:0005160~transforming growth factor beta receptor binding | 1 | 1/42 | 52/17293 | 0.118944 | 0.218966 | 7.91804 | ENSG00000122641 | INHBA | GO_MF |
| GO:0031593~polyubiquitin modification-dependent protein binding | 1 | 1/42 | 52/17293 | 0.118944 | 0.218966 | 7.91804 | ENSG00000118503 | TNFAIP3 | GO_MF |
| GO:0003823~antigen binding | 1 | 1/42 | 53/17293 | 0.121091 | 0.218966 | 7.768643 | ENSG00000168685 | IL7R | GO_MF |
| GO:0005070~SH3/SH2 adaptor activity | 1 | 1/42 | 53/17293 | 0.121091 | 0.218966 | 7.768643 | ENSG00000213658 | LAT | GO_MF |
| GO:1901681~sulfur compound binding | 2 | 2/42 | 250/17293 | 0.123148 | 0.218966 | 3.293905 | ENSG00000145147/ENSG00000118257 | SLIT2/NRP2 | GO_MF |
| GO:0016684~oxidoreductase activity, acting on peroxide as acceptor | 1 | 1/42 | 55/17293 | 0.125368 | 0.218966 | 7.486147 | ENSG00000073756 | PTGS2 | GO_MF |
| GO:0003707~steroid hormone receptor activity | 1 | 1/42 | 56/17293 | 0.127499 | 0.218966 | 7.352466 | ENSG00000119508 | NR4A3 | GO_MF |
| GO:0043621~protein self-association | 1 | 1/42 | 56/17293 | 0.127499 | 0.218966 | 7.352466 | ENSG00000118503 | TNFAIP3 | GO_MF |
| GO:0050840~extracellular matrix binding | 1 | 1/42 | 56/17293 | 0.127499 | 0.218966 | 7.352466 | ENSG00000145147 | SLIT2 | GO_MF |
| GO:0045182~translation regulator activity | 1 | 1/42 | 59/17293 | 0.133862 | 0.227421 | 6.978612 | ENSG00000055332 | EIF2AK2 | GO_MF |
| GO:0004860~protein kinase inhibitor activity | 1 | 1/42 | 63/17293 | 0.142275 | 0.239143 | 6.535525 | ENSG00000184557 | SOCS3 | GO_MF |
| GO:0033293~monocarboxylic acid binding | 1 | 1/42 | 64/17293 | 0.144366 | 0.240103 | 6.433408 | ENSG00000197081 | IGF2R | GO_MF |
| GO:0019210~kinase inhibitor activity | 1 | 1/42 | 67/17293 | 0.150608 | 0.247876 | 6.145345 | ENSG00000184557 | SOCS3 | GO_MF |
| GO:0031625~ubiquitin protein ligase binding | 2 | 2/42 | 290/17293 | 0.156293 | 0.25458 | 2.839573 | ENSG00000146648/ENSG00000157873 | EGFR/TNFRSF14 | GO_MF |
| GO:0019003~GDP binding | 1 | 1/42 | 73/17293 | 0.16296 | 0.262732 | 5.640248 | ENSG00000174775 | HRAS | GO_MF |
| GO:0003725~double-stranded RNA binding | 1 | 1/42 | 75/17293 | 0.167039 | 0.263921 | 5.489841 | ENSG00000055332 | EIF2AK2 | GO_MF |
| GO:0048029~monosaccharide binding | 1 | 1/42 | 75/17293 | 0.167039 | 0.263921 | 5.489841 | ENSG00000197081 | IGF2R | GO_MF |
| GO:0043130~ubiquitin binding | 1 | 1/42 | 76/17293 | 0.16907 | 0.264486 | 5.417607 | ENSG00000118503 | TNFAIP3 | GO_MF |
| GO:0044389~ubiquitin-like protein ligase binding | 2 | 2/42 | 308/17293 | 0.171732 | 0.266017 | 2.673624 | ENSG00000146648/ENSG00000157873 | EGFR/TNFRSF14 | GO_MF |
| GO:0019888~protein phosphatase regulator activity | 1 | 1/42 | 81/17293 | 0.179157 | 0.272181 | 5.083186 | ENSG00000055332 | EIF2AK2 | GO_MF |
| GO:0035591~signaling adaptor activity | 1 | 1/42 | 81/17293 | 0.179157 | 0.272181 | 5.083186 | ENSG00000213658 | LAT | GO_MF |
| GO:0016209~antioxidant activity | 1 | 1/42 | 85/17293 | 0.187141 | 0.278946 | 4.843978 | ENSG00000073756 | PTGS2 | GO_MF |
| GO:0038024~cargo receptor activity | 1 | 1/42 | 85/17293 | 0.187141 | 0.278946 | 4.843978 | ENSG00000187908 | DMBT1 | GO_MF |
| GO:0045296~cadherin binding | 2 | 2/42 | 329/17293 | 0.190059 | 0.280648 | 2.502967 | ENSG00000124942/ENSG00000146648 | AHNAK/EGFR | GO_MF |
| GO:0051213~dioxygenase activity | 1 | 1/42 | 91/17293 | 0.198974 | 0.291091 | 4.524594 | ENSG00000073756 | PTGS2 | GO_MF |
| GO:0035258~steroid hormone receptor binding | 1 | 1/42 | 92/17293 | 0.20093 | 0.291256 | 4.475414 | ENSG00000119508 | NR4A3 | GO_MF |
| GO:0019208~phosphatase regulator activity | 1 | 1/42 | 95/17293 | 0.206769 | 0.296995 | 4.334085 | ENSG00000055332 | EIF2AK2 | GO_MF |
| GO:0032182~ubiquitin-like protein binding | 1 | 1/42 | 96/17293 | 0.208706 | 0.297077 | 4.288938 | ENSG00000118503 | TNFAIP3 | GO_MF |
| GO:0004843~thiol-dependent ubiquitin-specific protease activity | 1 | 1/42 | 105/17293 | 0.225934 | 0.318729 | 3.921315 | ENSG00000118503 | TNFAIP3 | GO_MF |
| GO:0036459~thiol-dependent ubiquitinyl hydrolase activity | 1 | 1/42 | 113/17293 | 0.24094 | 0.333935 | 3.6437 | ENSG00000118503 | TNFAIP3 | GO_MF |
| GO:0101005~ubiquitinyl hydrolase activity | 1 | 1/42 | 113/17293 | 0.24094 | 0.333935 | 3.6437 | ENSG00000118503 | TNFAIP3 | GO_MF |
| GO:0019783~ubiquitin-like protein-specific protease activity | 1 | 1/42 | 122/17293 | 0.257483 | 0.353759 | 3.374902 | ENSG00000118503 | TNFAIP3 | GO_MF |
| GO:0020037~heme binding | 1 | 1/42 | 136/17293 | 0.282518 | 0.384403 | 3.027486 | ENSG00000073756 | PTGS2 | GO_MF |
| GO:0001228~DNA-binding transcription activator activity, RNA polymerase II-specific | 2 | 2/42 | 437/17293 | 0.287086 | 0.384403 | 1.884385 | ENSG00000101096/ENSG00000119508 | NFATC2/NR4A3 | GO_MF |
| GO:0004674~protein serine/threonine kinase activity | 2 | 2/42 | 437/17293 | 0.287086 | 0.384403 | 1.884385 | ENSG00000055332/ENSG00000146648 | EIF2AK2/EGFR | GO_MF |
| GO:0019903~protein phosphatase binding | 1 | 1/42 | 140/17293 | 0.289519 | 0.384403 | 2.940986 | ENSG00000146648 | EGFR | GO_MF |
| GO:0046906~tetrapyrrole binding | 1 | 1/42 | 146/17293 | 0.299895 | 0.391598 | 2.820124 | ENSG00000073756 | PTGS2 | GO_MF |
| GO:0140030~modification-dependent protein binding | 1 | 1/42 | 146/17293 | 0.299895 | 0.391598 | 2.820124 | ENSG00000118503 | TNFAIP3 | GO_MF |
| GO:0035257~nuclear hormone receptor binding | 1 | 1/42 | 152/17293 | 0.310122 | 0.401634 | 2.708803 | ENSG00000119508 | NR4A3 | GO_MF |
| GO:0016853~isomerase activity | 1 | 1/42 | 158/17293 | 0.320204 | 0.410125 | 2.605937 | ENSG00000240972 | MIF | GO_MF |
| GO:0016705~oxidoreductase activity, acting on paired donors, with incorporation or reduction of molecular oxygen | 1 | 1/42 | 159/17293 | 0.32187 | 0.410125 | 2.589548 | ENSG00000073756 | PTGS2 | GO_MF |
| GO:0005201~extracellular matrix structural constituent | 1 | 1/42 | 163/17293 | 0.328496 | 0.415219 | 2.526001 | ENSG00000171560 | FGA | GO_MF |
| GO:0030674~protein binding, bridging | 1 | 1/42 | 172/17293 | 0.343172 | 0.428943 | 2.393826 | ENSG00000213658 | LAT | GO_MF |
| GO:0004866~endopeptidase inhibitor activity | 1 | 1/42 | 173/17293 | 0.344784 | 0.428943 | 2.379989 | ENSG00000130303 | BST2 | GO_MF |
| GO:0019887~protein kinase regulator activity | 1 | 1/42 | 179/17293 | 0.354371 | 0.432622 | 2.300213 | ENSG00000184557 | SOCS3 | GO_MF |
| GO:0030414~peptidase inhibitor activity | 1 | 1/42 | 180/17293 | 0.355955 | 0.432622 | 2.287434 | ENSG00000130303 | BST2 | GO_MF |
| GO:0061135~endopeptidase regulator activity | 1 | 1/42 | 180/17293 | 0.355955 | 0.432622 | 2.287434 | ENSG00000130303 | BST2 | GO_MF |
| GO:0008234~cysteine-type peptidase activity | 1 | 1/42 | 183/17293 | 0.360686 | 0.435026 | 2.249935 | ENSG00000118503 | TNFAIP3 | GO_MF |
| GO:0051427~hormone receptor binding | 1 | 1/42 | 185/17293 | 0.363821 | 0.435482 | 2.225611 | ENSG00000119508 | NR4A3 | GO_MF |
| GO:0008022~protein C-terminus binding | 1 | 1/42 | 187/17293 | 0.36694 | 0.435914 | 2.201808 | ENSG00000174775 | HRAS | GO_MF |
| GO:0031406~carboxylic acid binding | 1 | 1/42 | 192/17293 | 0.374675 | 0.441781 | 2.144469 | ENSG00000197081 | IGF2R | GO_MF |
| GO:0051015~actin filament binding | 1 | 1/42 | 198/17293 | 0.383835 | 0.449229 | 2.079485 | ENSG00000146648 | EGFR | GO_MF |
| GO:0005516~calmodulin binding | 1 | 1/42 | 200/17293 | 0.386859 | 0.449439 | 2.05869 | ENSG00000146648 | EGFR | GO_MF |
| GO:0043177~organic acid binding | 1 | 1/42 | 204/17293 | 0.392863 | 0.453083 | 2.018324 | ENSG00000197081 | IGF2R | GO_MF |
| GO:0019207~kinase regulator activity | 1 | 1/42 | 206/17293 | 0.395844 | 0.453213 | 1.998729 | ENSG00000184557 | SOCS3 | GO_MF |
| GO:0061134~peptidase regulator activity | 1 | 1/42 | 217/17293 | 0.411985 | 0.468299 | 1.897411 | ENSG00000130303 | BST2 | GO_MF |
| GO:0060090~molecular adaptor activity | 1 | 1/42 | 236/17293 | 0.438878 | 0.495305 | 1.744653 | ENSG00000213658 | LAT | GO_MF |
| GO:0001227~DNA-binding transcription repressor activity, RNA polymerase II-specific | 1 | 1/42 | 242/17293 | 0.447118 | 0.501026 | 1.701397 | ENSG00000101096 | NFATC2 | GO_MF |
| GO:0030246~carbohydrate binding | 1 | 1/42 | 270/17293 | 0.484037 | 0.538577 | 1.524956 | ENSG00000197081 | IGF2R | GO_MF |
| GO:0016757~transferase activity, transferring glycosyl groups | 1 | 1/42 | 279/17293 | 0.495385 | 0.547348 | 1.475764 | ENSG00000105835 | NAMPT | GO_MF |
| GO:0042277~peptide binding | 1 | 1/42 | 286/17293 | 0.504042 | 0.553046 | 1.439644 | ENSG00000122641 | INHBA | GO_MF |
| GO:0030695~GTPase regulator activity | 1 | 1/42 | 304/17293 | 0.525642 | 0.572768 | 1.354402 | ENSG00000145147 | SLIT2 | GO_MF |
| GO:0003924~GTPase activity | 1 | 1/42 | 321/17293 | 0.545197 | 0.590008 | 1.282673 | ENSG00000174775 | HRAS | GO_MF |
| GO:0060589~nucleoside-triphosphatase regulator activity | 1 | 1/42 | 344/17293 | 0.570407 | 0.611218 | 1.196913 | ENSG00000145147 | SLIT2 | GO_MF |
| GO:0033218~amide binding | 1 | 1/42 | 346/17293 | 0.572533 | 0.611218 | 1.189994 | ENSG00000122641 | INHBA | GO_MF |
| GO:0005525~GTP binding | 1 | 1/42 | 372/17293 | 0.59926 | 0.626634 | 1.106823 | ENSG00000174775 | HRAS | GO_MF |
| GO:0032550~purine ribonucleoside binding | 1 | 1/42 | 376/17293 | 0.603224 | 0.626634 | 1.095048 | ENSG00000174775 | HRAS | GO_MF |
| GO:0001883~purine nucleoside binding | 1 | 1/42 | 379/17293 | 0.606172 | 0.626634 | 1.08638 | ENSG00000174775 | HRAS | GO_MF |
| GO:0032549~ribonucleoside binding | 1 | 1/42 | 380/17293 | 0.60715 | 0.626634 | 1.083521 | ENSG00000174775 | HRAS | GO_MF |
| GO:0004842~ubiquitin-protein transferase activity | 1 | 1/42 | 382/17293 | 0.609099 | 0.626634 | 1.077848 | ENSG00000118503 | TNFAIP3 | GO_MF |
| GO:0001882~nucleoside binding | 1 | 1/42 | 387/17293 | 0.61393 | 0.626634 | 1.063923 | ENSG00000174775 | HRAS | GO_MF |
| GO:0019001~guanyl nucleotide binding | 1 | 1/42 | 392/17293 | 0.618702 | 0.626634 | 1.050352 | ENSG00000174775 | HRAS | GO_MF |
| GO:0032561~guanyl ribonucleotide binding | 1 | 1/42 | 392/17293 | 0.618702 | 0.626634 | 1.050352 | ENSG00000174775 | HRAS | GO_MF |
| GO:0019787~ubiquitin-like protein transferase activity | 1 | 1/42 | 407/17293 | 0.632677 | 0.636706 | 1.011642 | ENSG00000118503 | TNFAIP3 | GO_MF |
| GO:0003779~actin binding | 1 | 1/42 | 430/17293 | 0.653138 | 0.653138 | 0.95753 | ENSG00000146648 | EGFR | GO_MF |
|  |  |  |  |  |  |  |  |  |  |

Supplementary Table2: The GO results of DE-IRGs.

| Terms | Counts | GeneRatio | BgRatio | pValue | FDR | foldEnrichment | geneID | geneSymbol | |  |  |  |  |  |
| --- | --- | --- | --- | --- | --- | --- | --- | --- | --- | --- | --- | --- | --- | --- |
| hsa04060~Cytokine-cytokine receptor interaction | 10 | 10/33 | 292/7858 | 1.87E-07 | 2.89E-05 | 8.154836 | ENSG00000168685/ENSG00000163464/ENSG00000106178/ENSG00000136244/ENSG00000180871/ENSG00000122641/ENSG00000128342/ENSG00000187266/ENSG00000173535/ENSG00000157873 | IL7R/CXCR1/CCL24/IL6/CXCR2/INHBA/LIF/EPOR/TNFRSF10C/TNFRSF14 | | | | | | |
| hsa04061~Viral protein interaction with cytokine and cytokine receptor | 6 | 6/33 | 98/7858 | 2.72E-06 | 0.000195 | 14.57885 | ENSG00000163464/ENSG00000106178/ENSG00000136244/ENSG00000180871/ENSG00000173535/ENSG00000157873 | CXCR1/CCL24/IL6/CXCR2/TNFRSF10C/TNFRSF14 | | | | |  |  |
| hsa04630~JAK-STAT signaling pathway | 7 | 7/33 | 162/7858 | 3.78E-06 | 0.000195 | 10.28919 | ENSG00000184557/ENSG00000168685/ENSG00000136244/ENSG00000174775/ENSG00000128342/ENSG00000146648/ENSG00000187266 | SOCS3/IL7R/IL6/HRAS/LIF/EGFR/EPOR | | | |  |  |  |
| hsa04668~TNF signaling pathway | 5 | 5/33 | 112/7858 | 9.28E-05 | 0.003597 | 10.63041 | ENSG00000184557/ENSG00000118503/ENSG00000073756/ENSG00000136244/ENSG00000128342 | SOCS3/TNFAIP3/PTGS2/IL6/LIF | | |  |  |  |  |
| hsa05163~Human cytomegalovirus infection | 6 | 6/33 | 220/7858 | 0.000264 | 0.0079 | 6.494215 | ENSG00000073756/ENSG00000136244/ENSG00000101096/ENSG00000174775/ENSG00000180871/ENSG00000146648 | PTGS2/IL6/NFATC2/HRAS/CXCR2/EGFR | | | |  |  |  |
| hsa05171~Coronavirus disease - COVID-19 | 6 | 6/33 | 226/7858 | 0.000306 | 0.0079 | 6.321802 | ENSG00000187608/ENSG00000055332/ENSG00000171560/ENSG00000136244/ENSG00000146648/ENSG00000162747 | ISG15/EIF2AK2/FGA/IL6/EGFR/FCGR3B | | | |  |  |  |
| hsa05235~PD-L1 expression and PD-1 checkpoint pathway in cancer | 4 | 4/33 | 89/7858 | 0.00049 | 0.01084 | 10.70208 | ENSG00000101096/ENSG00000174775/ENSG00000146648/ENSG00000213658 | NFATC2/HRAS/EGFR/LAT | | |  |  |  |  |
| hsa04625~C-type lectin receptor signaling pathway | 4 | 4/33 | 103/7858 | 0.000851 | 0.01648 | 9.247426 | ENSG00000073756/ENSG00000136244/ENSG00000101096/ENSG00000174775 | PTGS2/IL6/NFATC2/HRAS | | |  |  |  |  |
| hsa05167~Kaposi sarcoma-associated herpesvirus infection | 5 | 5/33 | 192/7858 | 0.001125 | 0.019367 | 6.201073 | ENSG00000055332/ENSG00000073756/ENSG00000136244/ENSG00000101096/ENSG00000174775 | EIF2AK2/PTGS2/IL6/NFATC2/HRAS | | | |  |  |  |
| hsa04650~Natural killer cell mediated cytotoxicity | 4 | 4/33 | 123/7858 | 0.001647 | 0.024625 | 7.743779 | ENSG00000101096/ENSG00000174775/ENSG00000162747/ENSG00000213658 | NFATC2/HRAS/FCGR3B/LAT | | |  |  |  |  |
| hsa04370~VEGF signaling pathway | 3 | 3/33 | 59/7858 | 0.001869 | 0.024625 | 12.10786 | ENSG00000073756/ENSG00000101096/ENSG00000174775 | PTGS2/NFATC2/HRAS | | |  |  |  |  |
| hsa04068~FoxO signaling pathway | 4 | 4/33 | 128/7858 | 0.001906 | 0.024625 | 7.441288 | ENSG00000168685/ENSG00000136244/ENSG00000174775/ENSG00000146648 | IL7R/IL6/HRAS/EGFR | |  |  |  |  |  |
| hsa05120~Epithelial cell signaling in Helicobacter pylori infection | 3 | 3/33 | 70/7858 | 0.00305 | 0.032602 | 10.20519 | ENSG00000163464/ENSG00000180871/ENSG00000146648 | CXCR1/CXCR2/EGFR | |  |  |  |  |  |
| hsa04151~PI3K-Akt signaling pathway | 6 | 6/33 | 352/7858 | 0.00307 | 0.032602 | 4.058884 | ENSG00000168685/ENSG00000136244/ENSG00000174775/ENSG00000109321/ENSG00000146648/ENSG00000187266 | IL7R/IL6/HRAS/AREG/EGFR/EPOR | | | |  |  |  |
| hsa04072~Phospholipase D signaling pathway | 4 | 4/33 | 147/7858 | 0.003155 | 0.032602 | 6.479489 | ENSG00000163464/ENSG00000174775/ENSG00000180871/ENSG00000146648 | CXCR1/HRAS/CXCR2/EGFR | | |  |  |  |  |
| hsa04921~Oxytocin signaling pathway | 4 | 4/33 | 152/7858 | 0.003559 | 0.033236 | 6.266348 | ENSG00000073756/ENSG00000101096/ENSG00000174775/ENSG00000146648 | PTGS2/NFATC2/HRAS/EGFR | | |  |  |  |  |
| hsa04144~Endocytosis | 5 | 5/33 | 251/7858 | 0.003645 | 0.033236 | 4.74345 | ENSG00000163464/ENSG00000174775/ENSG00000180871/ENSG00000146648/ENSG00000197081 | CXCR1/HRAS/CXCR2/EGFR/IGF2R | | | |  |  |  |
| hsa05160~Hepatitis C | 4 | 4/33 | 156/7858 | 0.003906 | 0.033637 | 6.105672 | ENSG00000184557/ENSG00000055332/ENSG00000174775/ENSG00000146648 | SOCS3/EIF2AK2/HRAS/EGFR | | |  |  |  |  |
| hsa01521~EGFR tyrosine kinase inhibitor resistance | 3 | 3/33 | 79/7858 | 0.004295 | 0.035039 | 9.042578 | ENSG00000136244/ENSG00000174775/ENSG00000146648 | IL6/HRAS/EGFR | |  |  |  |  |  |
| hsa04012~ErbB signaling pathway | 3 | 3/33 | 84/7858 | 0.005102 | 0.039541 | 8.504329 | ENSG00000174775/ENSG00000109321/ENSG00000146648 | HRAS/AREG/EGFR | |  |  |  |  |  |
| hsa05210~Colorectal cancer | 3 | 3/33 | 86/7858 | 0.005449 | 0.040218 | 8.306554 | ENSG00000174775/ENSG00000109321/ENSG00000146648 | HRAS/AREG/EGFR | |  |  |  |  |  |
| hsa04657~IL-17 signaling pathway | 3 | 3/33 | 94/7858 | 0.006976 | 0.048409 | 7.599613 | ENSG00000118503/ENSG00000073756/ENSG00000136244 | TNFAIP3/PTGS2/IL6 | |  |  |  |  |  |
| hsa04640~Hematopoietic cell lineage | 3 | 3/33 | 95/7858 | 0.007183 | 0.048409 | 7.519617 | ENSG00000168685/ENSG00000136244/ENSG00000187266 | IL7R/IL6/EPOR | |  |  |  |  |  |
| hsa04062~Chemokine signaling pathway | 4 | 4/33 | 190/7858 | 0.007831 | 0.050576 | 5.013078 | ENSG00000163464/ENSG00000106178/ENSG00000174775/ENSG00000180871 | CXCR1/CCL24/HRAS/CXCR2 | | |  |  |  |  |
| hsa04064~NF-kappa B signaling pathway | 3 | 3/33 | 102/7858 | 0.008735 | 0.050995 | 7.003565 | ENSG00000118503/ENSG00000073756/ENSG00000213658 | TNFAIP3/PTGS2/LAT | |  |  |  |  |  |
| hsa04660~T cell receptor signaling pathway | 3 | 3/33 | 102/7858 | 0.008735 | 0.050995 | 7.003565 | ENSG00000101096/ENSG00000174775/ENSG00000213658 | NFATC2/HRAS/LAT | |  |  |  |  |  |
| hsa05169~Epstein-Barr virus infection | 4 | 4/33 | 198/7858 | 0.009033 | 0.050995 | 4.81053 | ENSG00000187608/ENSG00000118503/ENSG00000055332/ENSG00000136244 | ISG15/TNFAIP3/EIF2AK2/IL6 | | |  |  |  |  |
| hsa04659~Th17 cell differentiation | 3 | 3/33 | 104/7858 | 0.009212 | 0.050995 | 6.868881 | ENSG00000136244/ENSG00000101096/ENSG00000213658 | IL6/NFATC2/LAT | |  |  |  |  |  |
| hsa05165~Human papillomavirus infection | 5 | 5/33 | 329/7858 | 0.011281 | 0.060295 | 3.618863 | ENSG00000187608/ENSG00000055332/ENSG00000073756/ENSG00000174775/ENSG00000146648 | ISG15/EIF2AK2/PTGS2/HRAS/EGFR | | | |  |  |  |
| hsa05219~Bladder cancer | 2 | 2/33 | 41/7858 | 0.012662 | 0.065419 | 11.61567 | ENSG00000174775/ENSG00000146648 | HRAS/EGFR | |  |  |  |  |  |
| hsa04380~Osteoclast differentiation | 3 | 3/33 | 124/7858 | 0.014823 | 0.074115 | 5.760997 | ENSG00000184557/ENSG00000101096/ENSG00000162747 | SOCS3/NFATC2/FCGR3B | | |  |  |  |  |
| hsa05135~Yersinia infection | 3 | 3/33 | 133/7858 | 0.01786 | 0.086509 | 5.371155 | ENSG00000136244/ENSG00000101096/ENSG00000213658 | IL6/NFATC2/LAT | |  |  |  |  |  |
| hsa05162~Measles | 3 | 3/33 | 139/7858 | 0.020064 | 0.093208 | 5.139307 | ENSG00000118503/ENSG00000055332/ENSG00000136244 | TNFAIP3/EIF2AK2/IL6 | |  |  |  |  |  |
| hsa04550~Signaling pathways regulating pluripotency of stem cells | 3 | 3/33 | 140/7858 | 0.020446 | 0.093208 | 5.102597 | ENSG00000174775/ENSG00000122641/ENSG00000128342 | HRAS/INHBA/LIF | |  |  |  |  |  |
| hsa05213~Endometrial cancer | 2 | 2/33 | 58/7858 | 0.024419 | 0.108141 | 8.211076 | ENSG00000174775/ENSG00000146648 | HRAS/EGFR | |  |  |  |  |  |
| hsa04218~Cellular senescence | 3 | 3/33 | 155/7858 | 0.026651 | 0.114749 | 4.608798 | ENSG00000136244/ENSG00000101096/ENSG00000174775 | IL6/NFATC2/HRAS | |  |  |  |  |  |
| hsa05161~Hepatitis B | 3 | 3/33 | 162/7858 | 0.029858 | 0.12508 | 4.409652 | ENSG00000136244/ENSG00000101096/ENSG00000174775 | IL6/NFATC2/HRAS | |  |  |  |  |  |
| hsa04664~Fc epsilon RI signaling pathway | 2 | 2/33 | 67/7858 | 0.031908 | 0.128634 | 7.108096 | ENSG00000174775/ENSG00000213658 | HRAS/LAT |  |  |  |  |  |  |
| hsa05164~Influenza A | 3 | 3/33 | 169/7858 | 0.033261 | 0.128634 | 4.227004 | ENSG00000184557/ENSG00000055332/ENSG00000136244 | SOCS3/EIF2AK2/IL6 | |  |  |  |  |  |
| hsa04917~Prolactin signaling pathway | 2 | 2/33 | 70/7858 | 0.034582 | 0.128634 | 6.803463 | ENSG00000184557/ENSG00000174775 | SOCS3/HRAS | |  |  |  |  |  |
| hsa05230~Central carbon metabolism in cancer | 2 | 2/33 | 70/7858 | 0.034582 | 0.128634 | 6.803463 | ENSG00000174775/ENSG00000146648 | HRAS/EGFR | |  |  |  |  |  |
| hsa05218~Melanoma | 2 | 2/33 | 72/7858 | 0.036412 | 0.128634 | 6.614478 | ENSG00000174775/ENSG00000146648 | HRAS/EGFR | |  |  |  |  |  |
| hsa05223~Non-small cell lung cancer | 2 | 2/33 | 72/7858 | 0.036412 | 0.128634 | 6.614478 | ENSG00000174775/ENSG00000146648 | HRAS/EGFR | |  |  |  |  |  |
| hsa05140~Leishmaniasis | 2 | 2/33 | 73/7858 | 0.037341 | 0.128634 | 6.523869 | ENSG00000073756/ENSG00000162747 | PTGS2/FCGR3B | |  |  |  |  |  |
| hsa05214~Glioma | 2 | 2/33 | 74/7858 | 0.038279 | 0.128634 | 6.435708 | ENSG00000174775/ENSG00000146648 | HRAS/EGFR | |  |  |  |  |  |
| hsa04621~NOD-like receptor signaling pathway | 3 | 3/33 | 179/7858 | 0.038463 | 0.128634 | 3.990858 | ENSG00000118503/ENSG00000136244/ENSG00000105835 | TNFAIP3/IL6/NAMPT | |  |  |  |  |  |
| hsa04360~Axon guidance | 3 | 3/33 | 180/7858 | 0.039005 | 0.128634 | 3.968687 | ENSG00000101096/ENSG00000174775/ENSG00000145147 | NFATC2/HRAS/SLIT2 | |  |  |  |  |  |
| hsa04662~B cell receptor signaling pathway | 2 | 2/33 | 78/7858 | 0.042121 | 0.136015 | 6.105672 | ENSG00000101096/ENSG00000174775 | NFATC2/HRAS | |  |  |  |  |  |
| hsa05202~Transcriptional misregulation in cancer | 3 | 3/33 | 189/7858 | 0.04406 | 0.139374 | 3.779702 | ENSG00000144802/ENSG00000136244/ENSG00000119508 | NFKBIZ/IL6/NR4A3 | |  |  |  |  |  |
| hsa05168~Herpes simplex virus 1 infection | 5 | 5/33 | 491/7858 | 0.052039 | 0.156745 | 2.42486 | ENSG00000184557/ENSG00000055332/ENSG00000130303/ENSG00000136244/ENSG00000157873 | SOCS3/EIF2AK2/BST2/IL6/TNFRSF14 | | | |  |  |  |
| hsa04540~Gap junction | 2 | 2/33 | 88/7858 | 0.052324 | 0.156745 | 5.411846 | ENSG00000174775/ENSG00000146648 | HRAS/EGFR | |  |  |  |  |  |
| hsa05150~Staphylococcus aureus infection | 2 | 2/33 | 89/7858 | 0.053389 | 0.156745 | 5.351038 | ENSG00000164825/ENSG00000162747 | DEFB1/FCGR3B | |  |  |  |  |  |
| hsa04658~Th1 and Th2 cell differentiation | 2 | 2/33 | 90/7858 | 0.054462 | 0.156745 | 5.291582 | ENSG00000101096/ENSG00000213658 | NFATC2/LAT | |  |  |  |  |  |
| hsa05170~Human immunodeficiency virus 1 infection | 3 | 3/33 | 208/7858 | 0.05576 | 0.156745 | 3.434441 | ENSG00000130303/ENSG00000101096/ENSG00000174775 | BST2/NFATC2/HRAS | |  |  |  |  |  |
| hsa04015~Rap1 signaling pathway | 3 | 3/33 | 209/7858 | 0.056414 | 0.156745 | 3.418008 | ENSG00000174775/ENSG00000146648/ENSG00000213658 | HRAS/EGFR/LAT | |  |  |  |  |  |
| hsa04912~GnRH signaling pathway | 2 | 2/33 | 92/7858 | 0.056631 | 0.156745 | 5.176548 | ENSG00000174775/ENSG00000146648 | HRAS/EGFR | |  |  |  |  |  |
| hsa04666~Fc gamma R-mediated phagocytosis | 2 | 2/33 | 94/7858 | 0.05883 | 0.159975 | 5.066409 | ENSG00000162747/ENSG00000213658 | FCGR3B/LAT | |  |  |  |  |  |
| hsa01522~Endocrine resistance | 2 | 2/33 | 96/7858 | 0.061058 | 0.160499 | 4.960859 | ENSG00000174775/ENSG00000146648 | HRAS/EGFR | |  |  |  |  |  |
| hsa05166~Human T-cell leukemia virus 1 infection | 3 | 3/33 | 216/7858 | 0.061093 | 0.160499 | 3.307239 | ENSG00000136244/ENSG00000101096/ENSG00000174775 | IL6/NFATC2/HRAS | |  |  |  |  |  |
| hsa05215~Prostate cancer | 2 | 2/33 | 97/7858 | 0.062184 | 0.160641 | 4.909716 | ENSG00000174775/ENSG00000146648 | HRAS/EGFR | |  |  |  |  |  |
| hsa05231~Choline metabolism in cancer | 2 | 2/33 | 98/7858 | 0.063316 | 0.160861 | 4.859617 | ENSG00000174775/ENSG00000146648 | HRAS/EGFR | |  |  |  |  |  |
| hsa05010~Alzheimer disease | 4 | 4/33 | 364/7858 | 0.064344 | 0.160861 | 2.616717 | ENSG00000055332/ENSG00000073756/ENSG00000136244/ENSG00000174775 | EIF2AK2/PTGS2/IL6/HRAS | | |  |  |  |  |
| hsa04933~AGE-RAGE signaling pathway in diabetic complications | 2 | 2/33 | 100/7858 | 0.065602 | 0.161402 | 4.762424 | ENSG00000136244/ENSG00000174775 | IL6/HRAS |  |  |  |  |  |  |
| hsa00360~Phenylalanine metabolism | 1 | 1/33 | 17/7858 | 0.069111 | 0.167379 | 14.00713 | ENSG00000240972 | MIF |  |  |  |  |  |  |
| hsa04014~Ras signaling pathway | 3 | 3/33 | 229/7858 | 0.070257 | 0.167535 | 3.119492 | ENSG00000174775/ENSG00000146648/ENSG00000213658 | HRAS/EGFR/LAT | |  |  |  |  |  |
| hsa04931~Insulin resistance | 2 | 2/33 | 108/7858 | 0.075019 | 0.176181 | 4.409652 | ENSG00000184557/ENSG00000136244 | SOCS3/IL6 | |  |  |  |  |  |
| hsa04066~HIF-1 signaling pathway | 2 | 2/33 | 109/7858 | 0.076225 | 0.176342 | 4.369197 | ENSG00000136244/ENSG00000146648 | IL6/EGFR |  |  |  |  |  |  |
| hsa04726~Serotonergic synapse | 2 | 2/33 | 113/7858 | 0.081114 | 0.184891 | 4.214535 | ENSG00000073756/ENSG00000174775 | PTGS2/HRAS | |  |  |  |  |  |
| hsa05132~Salmonella infection | 3 | 3/33 | 249/7858 | 0.085506 | 0.192078 | 2.86893 | ENSG00000124942/ENSG00000136244/ENSG00000174775 | AHNAK/IL6/HRAS | |  |  |  |  |  |
| hsa04935~Growth hormone synthesis, secretion and action | 2 | 2/33 | 119/7858 | 0.088626 | 0.196242 | 4.002037 | ENSG00000184557/ENSG00000174775 | SOCS3/HRAS | |  |  |  |  |  |
| hsa05206~MicroRNAs in cancer | 3 | 3/33 | 265/7858 | 0.098653 | 0.215368 | 2.695712 | ENSG00000073756/ENSG00000174775/ENSG00000146648 | PTGS2/HRAS/EGFR | |  |  |  |  |  |
| hsa04926~Relaxin signaling pathway | 2 | 2/33 | 129/7858 | 0.101588 | 0.218696 | 3.691802 | ENSG00000174775/ENSG00000146648 | HRAS/EGFR | |  |  |  |  |  |
| hsa04910~Insulin signaling pathway | 2 | 2/33 | 136/7858 | 0.110961 | 0.232419 | 3.501783 | ENSG00000184557/ENSG00000174775 | SOCS3/HRAS | |  |  |  |  |  |
| hsa04915~Estrogen signaling pathway | 2 | 2/33 | 136/7858 | 0.110961 | 0.232419 | 3.501783 | ENSG00000174775/ENSG00000146648 | HRAS/EGFR | |  |  |  |  |  |
| hsa01523~Antifolate resistance | 1 | 1/33 | 31/7858 | 0.122528 | 0.247868 | 7.681329 | ENSG00000136244 | IL6 |  |  |  |  |  |  |
| hsa04010~MAPK signaling pathway | 3 | 3/33 | 294/7858 | 0.12444 | 0.247868 | 2.429808 | ENSG00000174775/ENSG00000109321/ENSG00000146648 | HRAS/AREG/EGFR | |  |  |  |  |  |
| hsa05224~Breast cancer | 2 | 2/33 | 146/7858 | 0.124734 | 0.247868 | 3.261934 | ENSG00000174775/ENSG00000146648 | HRAS/EGFR | |  |  |  |  |  |
| hsa05226~Gastric cancer | 2 | 2/33 | 146/7858 | 0.124734 | 0.247868 | 3.261934 | ENSG00000174775/ENSG00000146648 | HRAS/EGFR | |  |  |  |  |  |
| hsa04932~Non-alcoholic fatty liver disease | 2 | 2/33 | 149/7858 | 0.128946 | 0.252995 | 3.196258 | ENSG00000184557/ENSG00000136244 | SOCS3/IL6 | |  |  |  |  |  |
| hsa00760~Nicotinate and nicotinamide metabolism | 1 | 1/33 | 34/7858 | 0.133581 | 0.258814 | 7.003565 | ENSG00000105835 | NAMPT |  |  |  |  |  |  |
| hsa05340~Primary immunodeficiency | 1 | 1/33 | 35/7858 | 0.137236 | 0.261621 | 6.803463 | ENSG00000168685 | IL7R |  |  |  |  |  |  |
| hsa00350~Tyrosine metabolism | 1 | 1/33 | 36/7858 | 0.140875 | 0.261621 | 6.614478 | ENSG00000240972 | MIF |  |  |  |  |  |  |
| hsa05143~African trypanosomiasis | 1 | 1/33 | 36/7858 | 0.140875 | 0.261621 | 6.614478 | ENSG00000136244 | IL6 |  |  |  |  |  |  |
| hsa04217~Necroptosis | 2 | 2/33 | 158/7858 | 0.141782 | 0.261621 | 3.014193 | ENSG00000118503/ENSG00000055332 | TNFAIP3/EIF2AK2 | |  |  |  |  |  |
| hsa05216~Thyroid cancer | 1 | 1/33 | 37/7858 | 0.1445 | 0.263499 | 6.435708 | ENSG00000174775 | HRAS |  |  |  |  |  |  |
| hsa05332~Graft-versus-host disease | 1 | 1/33 | 38/7858 | 0.148109 | 0.266941 | 6.266348 | ENSG00000136244 | IL6 |  |  |  |  |  |  |
| hsa05225~Hepatocellular carcinoma | 2 | 2/33 | 165/7858 | 0.151954 | 0.270723 | 2.886318 | ENSG00000174775/ENSG00000146648 | HRAS/EGFR | |  |  |  |  |  |
| hsa05152~Tuberculosis | 2 | 2/33 | 175/7858 | 0.166736 | 0.293683 | 2.721385 | ENSG00000136244/ENSG00000162747 | IL6/FCGR3B | |  |  |  |  |  |
| hsa02010~ABC transporters | 1 | 1/33 | 44/7858 | 0.169459 | 0.295126 | 5.411846 | ENSG00000164825 | DEFB1 |  |  |  |  |  |  |
| hsa04672~Intestinal immune network for IgA production | 1 | 1/33 | 46/7858 | 0.17646 | 0.300564 | 5.176548 | ENSG00000136244 | IL6 |  |  |  |  |  |  |
| hsa04930~Type II diabetes mellitus | 1 | 1/33 | 46/7858 | 0.17646 | 0.300564 | 5.176548 | ENSG00000184557 | SOCS3 |  |  |  |  |  |  |
| hsa05144~Malaria | 1 | 1/33 | 49/7858 | 0.186854 | 0.314808 | 4.859617 | ENSG00000136244 | IL6 |  |  |  |  |  |  |
| hsa04913~Ovarian steroidogenesis | 1 | 1/33 | 51/7858 | 0.193712 | 0.322854 | 4.669043 | ENSG00000073756 | PTGS2 |  |  |  |  |  |  |
| hsa04510~Focal adhesion | 2 | 2/33 | 199/7858 | 0.203158 | 0.332992 | 2.393178 | ENSG00000174775/ENSG00000146648 | HRAS/EGFR | |  |  |  |  |  |
| hsa05205~Proteoglycans in cancer | 2 | 2/33 | 200/7858 | 0.204698 | 0.332992 | 2.381212 | ENSG00000174775/ENSG00000146648 | HRAS/EGFR | |  |  |  |  |  |
| hsa05203~Viral carcinogenesis | 2 | 2/33 | 201/7858 | 0.20624 | 0.332992 | 2.369365 | ENSG00000055332/ENSG00000174775 | EIF2AK2/HRAS | |  |  |  |  |  |
| hsa04923~Regulation of lipolysis in adipocytes | 1 | 1/33 | 56/7858 | 0.210614 | 0.336548 | 4.252165 | ENSG00000073756 | PTGS2 |  |  |  |  |  |  |
| hsa05134~Legionellosis | 1 | 1/33 | 57/7858 | 0.213953 | 0.338395 | 4.177565 | ENSG00000136244 | IL6 |  |  |  |  |  |  |
| hsa04730~Long-term depression | 1 | 1/33 | 59/7858 | 0.22059 | 0.343046 | 4.035953 | ENSG00000174775 | HRAS |  |  |  |  |  |  |
| hsa00590~Arachidonic acid metabolism | 1 | 1/33 | 60/7858 | 0.223888 | 0.343046 | 3.968687 | ENSG00000073756 | PTGS2 |  |  |  |  |  |  |
| hsa04213~Longevity regulating pathway - multiple species | 1 | 1/33 | 61/7858 | 0.227172 | 0.343046 | 3.903626 | ENSG00000174775 | HRAS |  |  |  |  |  |  |
| hsa04623~Cytosolic DNA-sensing pathway | 1 | 1/33 | 61/7858 | 0.227172 | 0.343046 | 3.903626 | ENSG00000136244 | IL6 |  |  |  |  |  |  |
| hsa04810~Regulation of actin cytoskeleton | 2 | 2/33 | 215/7858 | 0.227959 | 0.343046 | 2.215081 | ENSG00000174775/ENSG00000146648 | HRAS/EGFR | |  |  |  |  |  |
| hsa05321~Inflammatory bowel disease | 1 | 1/33 | 63/7858 | 0.2337 | 0.348303 | 3.779702 | ENSG00000136244 | IL6 |  |  |  |  |  |  |
| hsa04929~GnRH secretion | 1 | 1/33 | 64/7858 | 0.236944 | 0.349775 | 3.720644 | ENSG00000174775 | HRAS |  |  |  |  |  |  |
| hsa04720~Long-term potentiation | 1 | 1/33 | 66/7858 | 0.243393 | 0.352578 | 3.607897 | ENSG00000174775 | HRAS |  |  |  |  |  |  |
| hsa05221~Acute myeloid leukemia | 1 | 1/33 | 66/7858 | 0.243393 | 0.352578 | 3.607897 | ENSG00000174775 | HRAS |  |  |  |  |  |  |
| hsa04137~Mitophagy - animal | 1 | 1/33 | 68/7858 | 0.249788 | 0.355203 | 3.501783 | ENSG00000174775 | HRAS |  |  |  |  |  |  |
| hsa05211~Renal cell carcinoma | 1 | 1/33 | 68/7858 | 0.249788 | 0.355203 | 3.501783 | ENSG00000174775 | HRAS |  |  |  |  |  |  |
| hsa04920~Adipocytokine signaling pathway | 1 | 1/33 | 69/7858 | 0.252966 | 0.356453 | 3.451032 | ENSG00000184557 | SOCS3 |  |  |  |  |  |  |
| hsa04622~RIG-I-like receptor signaling pathway | 1 | 1/33 | 70/7858 | 0.256131 | 0.357661 | 3.401732 | ENSG00000187608 | ISG15 |  |  |  |  |  |  |
| hsa04520~Adherens junction | 1 | 1/33 | 71/7858 | 0.259283 | 0.35883 | 3.35382 | ENSG00000146648 | EGFR |  |  |  |  |  |  |
[truncated: 5,977 more chars]
